# Supplementary material for: Ribosomal Dysregulation in Metastatic Laryngeal Squamous Cell Carcinoma: Proteomic Insights and CX-5461’s Therapeutic Promise
Source: MDPI journal article supplement (doi:10.3390/toxics12050363), 2024-05-13

Figure 4A\_\_Oringin images

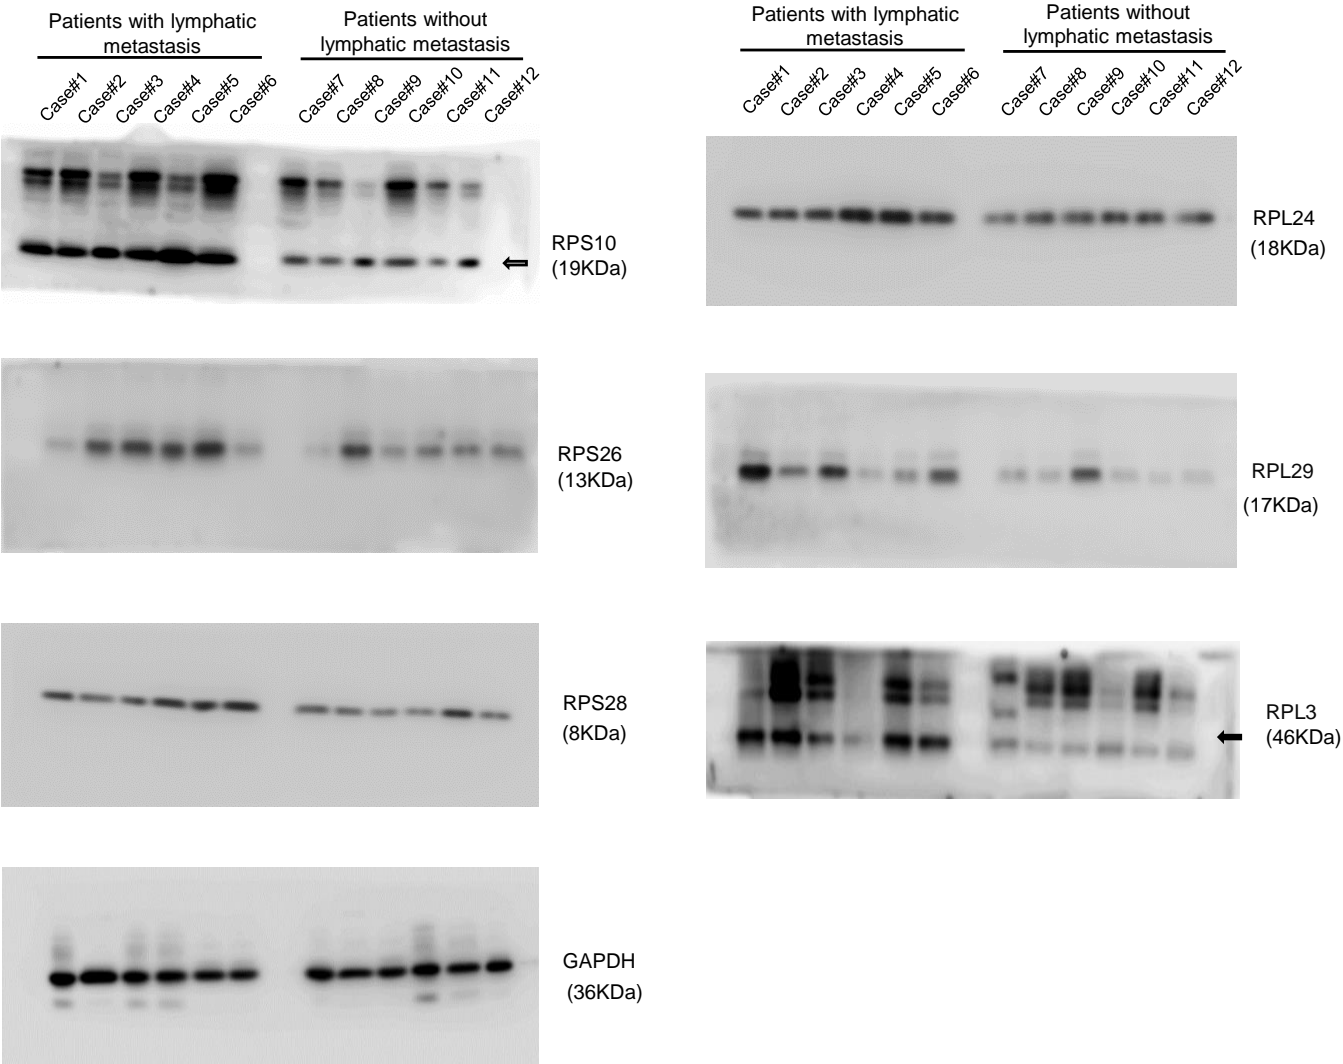

Figure 5C\_\_Oringin images

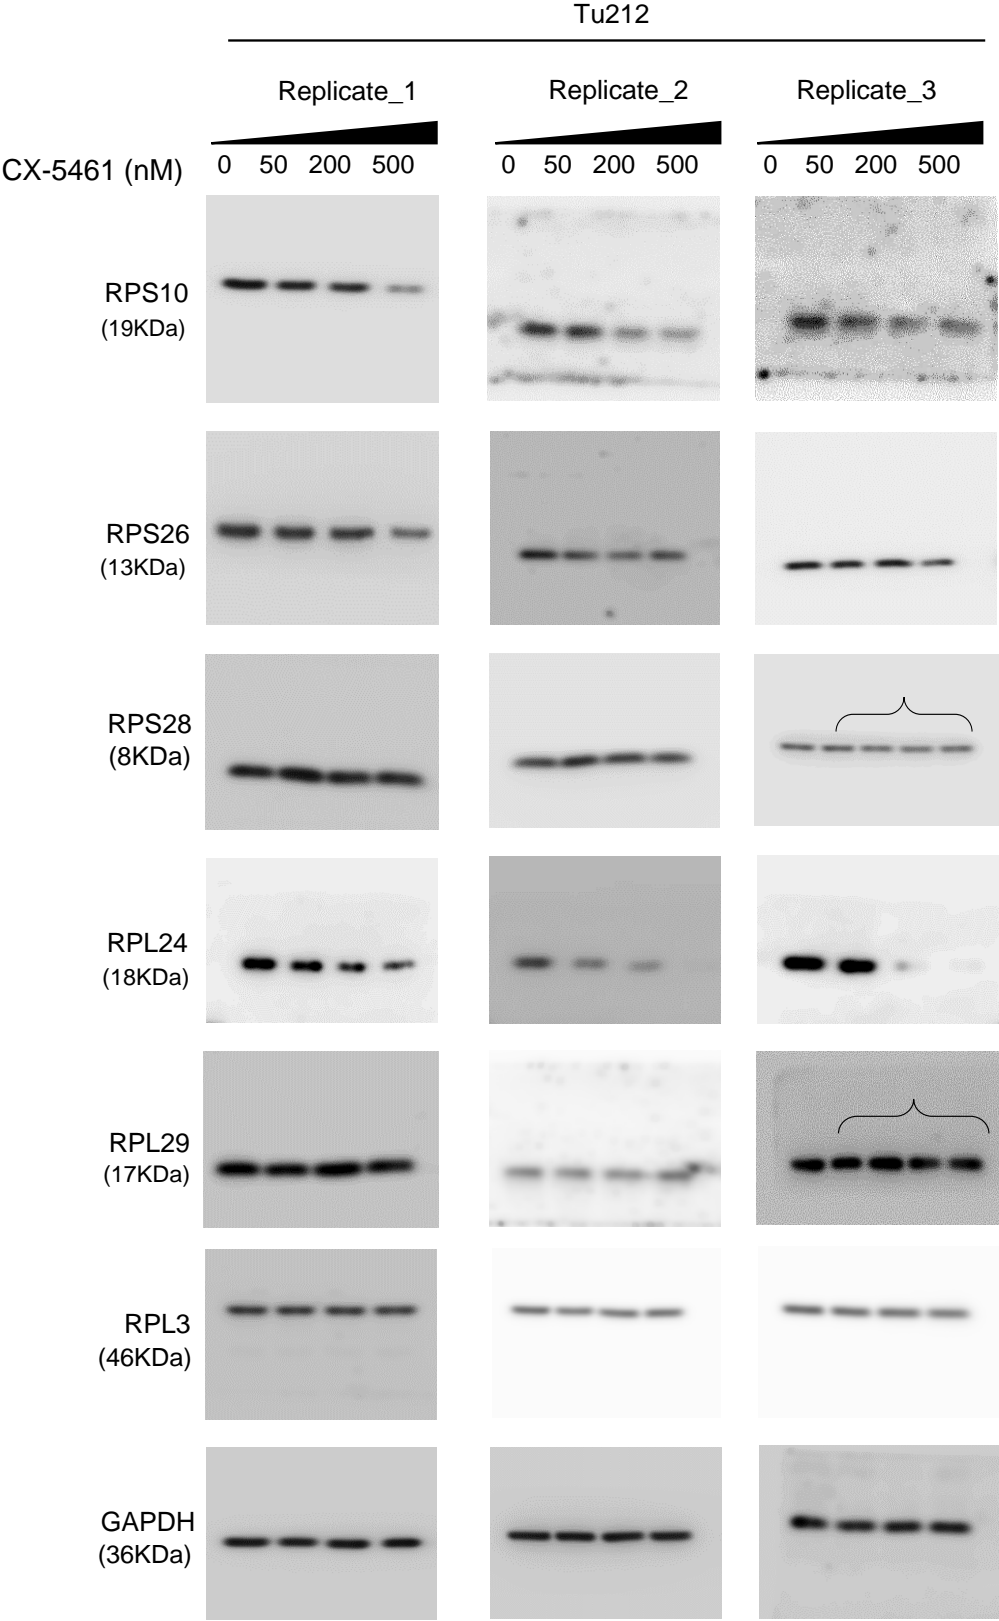

Figure 5D\_\_Oringin images

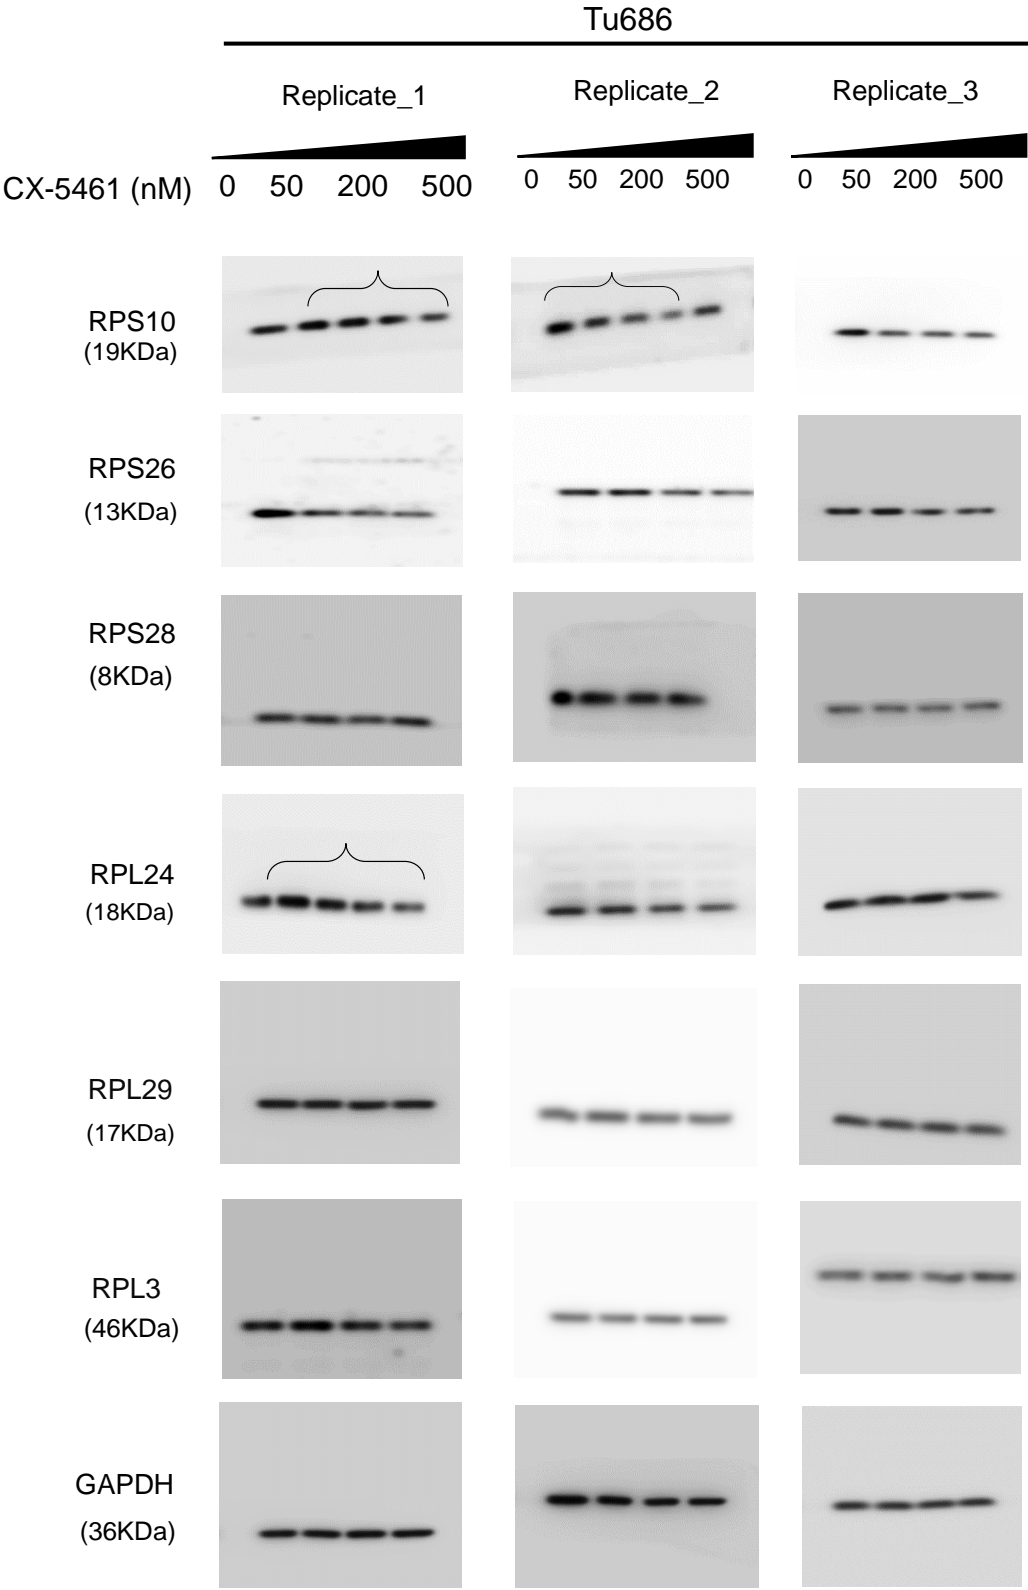

Figure 6D\_\_Oringin images

Tu212

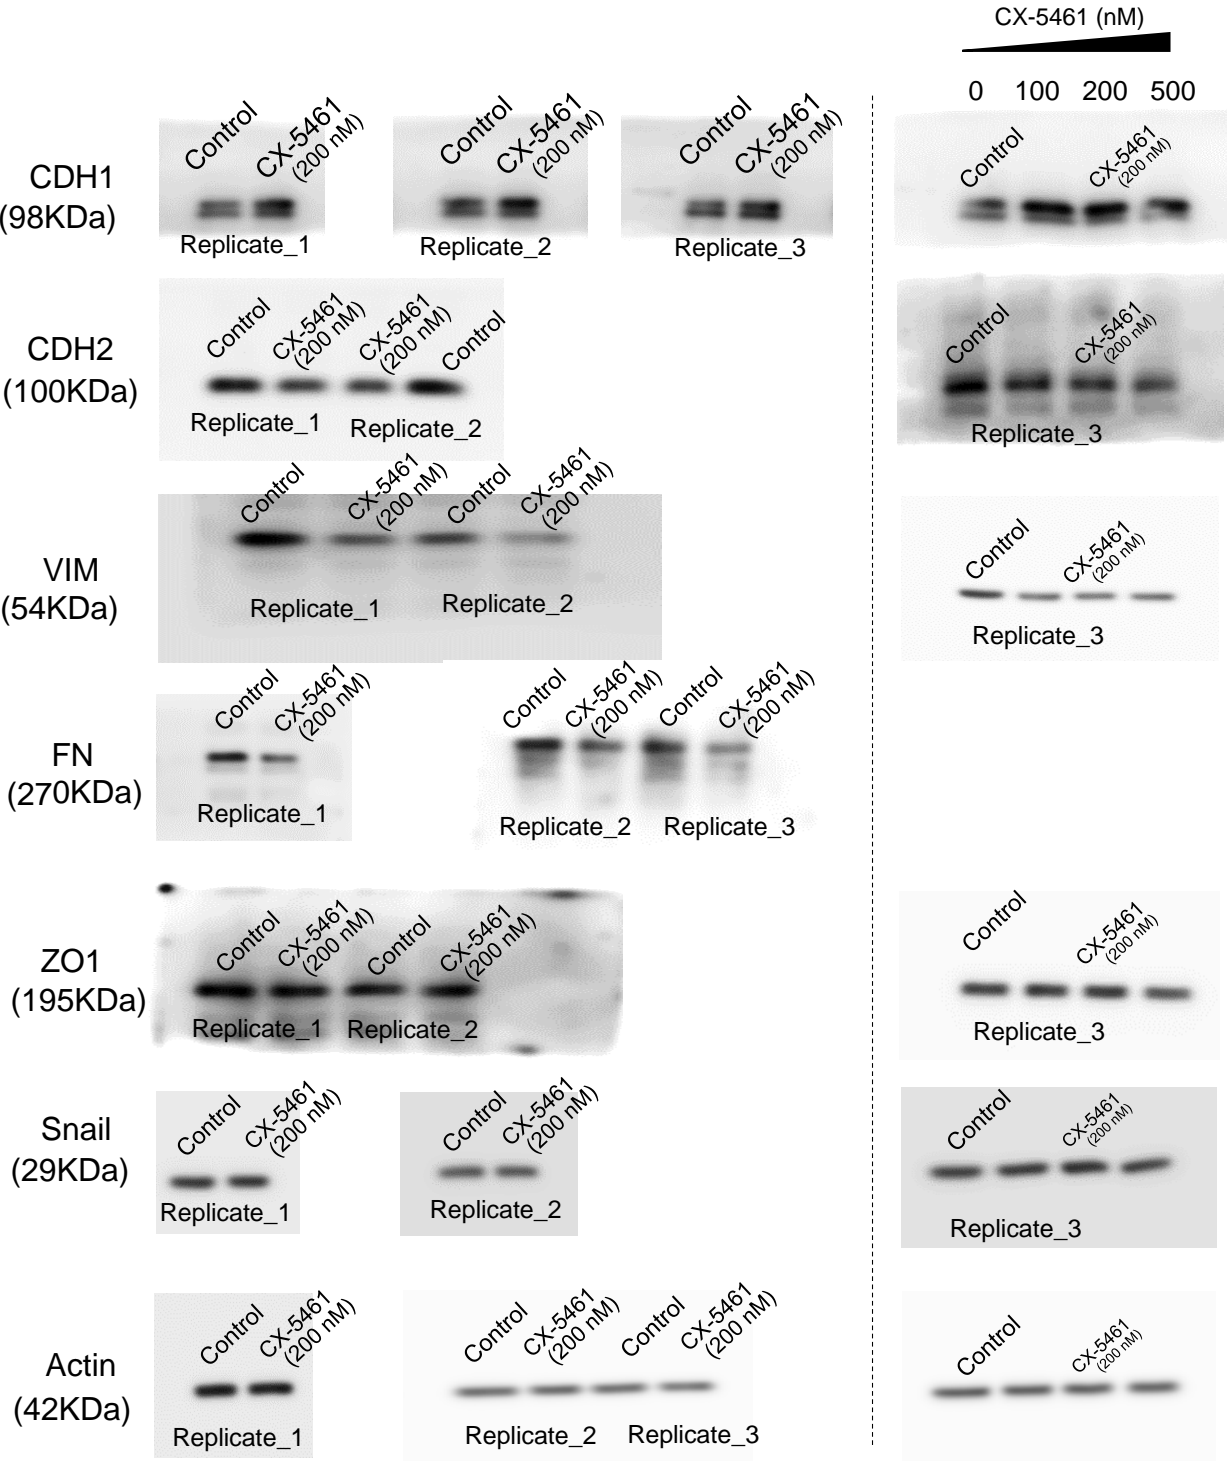

Figure 6D\_\_Oringin images

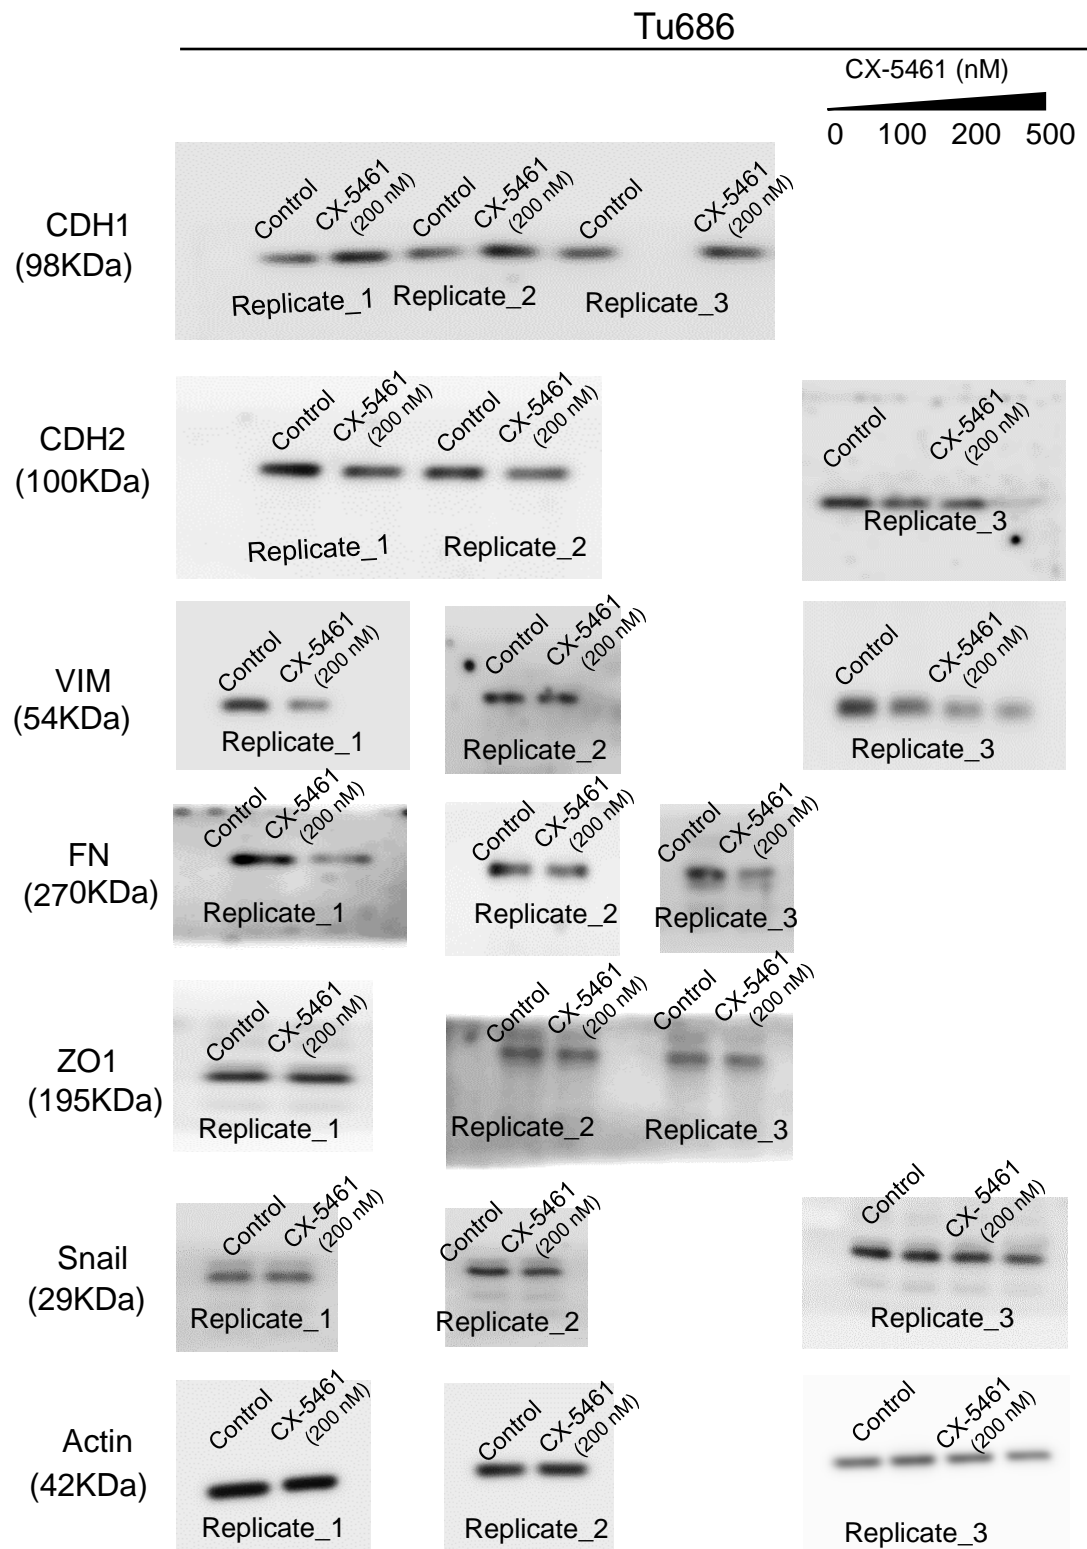

Supplement: s1 [file s1]
