# Supplementary material for: Ribosomal Dysregulation in Metastatic Laryngeal Squamous Cell Carcinoma: Proteomic Insights and CX-5461’s Therapeutic Promise
Source: Toxics. 2024 May 13;12(5):363. doi: 10.3390/toxics12050363 (PMC11126056; doi:10.3390/toxics12050363)
Supplement: Supplementary file 1 [file toxics-12-00363-s001.zip]

Archive with 7 entries (7 files):
- Supplementary Figures.pdf
- Supplementary images.pdf
- Table S1.xlsx
- Table S2.xlsx
- Table S3.xlsx
- Table S4.xlsx
- Table S5.xlsx
