# Supplementary material for: Ribosomal Dysregulation in Metastatic Laryngeal Squamous Cell Carcinoma: Proteomic Insights and CX-5461’s Therapeutic Promise
Source: Toxics. 2024 May 13;12(5):363. doi: 10.3390/toxics12050363 (PMC11126056; doi:10.3390/toxics12050363)
Supplement: Supplementary file 1 [file toxics-12-00363-s001.zip › Table S1.xlsx]

## Sheet: Table S1
Table S1 Distribution of samples in three TMT experiments
Groups	Labeling reagents	Sample_ID	Patients_ID
TMT_Group_1	TMTpro_126	P11	Patient_11
	TMTpro_127N	Pt11
	TMTpro_127C	P12	Patient_12
	TMTpro_128N	Pt12
	TMTpro_129N	P1	Patient_1
	TMTpro_129C	Pt1
	TMTpro_130N	P2	Patient_2
	TMTpro_130C	Pt2
	TMTpro_131N	P13	Patient_13
	TMTpro_131C	Pt13
	TMTpro_132N	P14	Patient_14
	TMTpro_132C	Pt14
	TMTpro_133N	P3	Patient_3
	TMTpro_133C	Pt3
	TMTpro_134N	P15	Patient_15
	TMTpro_134C	Pt15
	TMTpro_135N	MIX(Internal standard)
TMT_Group_2	TMTpro_128N	P16	Patient_16
	TMTpro_128C	Pt16
	TMTpro_129N	P17	Patient_17
	TMTpro_129C	Pt17
	TMTpro_130N	P4	Patient_4
	TMTpro_130C	Pt4
	TMTpro_131N	P5	Patient_5
	TMTpro_131C	Pt5
	TMTpro_132N	P6	Patient_6
	TMTpro_132C	Pt6
	TMTpro_133N	P18	Patient_18
	TMTpro_133C	Pt18
	TMTpro_134N	P19	Patient_19
	TMTpro_134C	Pt19
	TMTpro_135N	MIX(Internal standard)
TMT_Group_3	TMT_126	P20	Patient_20
	TMT_127N	Pt20
	TMT_127C	P7	Patient_7
	TMT_128N	Pt7
	TMT_128C	P8	Patient_8
	TMT_129N	Pt8
	TMT_129C	P9	Patient_9
	TMT_130N	Pt9
	TMT_130C	P10	Patient_10
	TMT_131N	Pt10
	TMT_131C	MIX(Internal standard)
