# Supplementary material for: Ribosomal Dysregulation in Metastatic Laryngeal Squamous Cell Carcinoma: Proteomic Insights and CX-5461’s Therapeutic Promise
Source: Toxics. 2024 May 13;12(5):363. doi: 10.3390/toxics12050363 (PMC11126056; doi:10.3390/toxics12050363)
Supplement: Supplementary file 1 [file toxics-12-00363-s001.zip › Table S2.xlsx]

## Sheet: Table S2
Table S2. List of q-PCR primers.
Primers	Sequence
β-actin-F	TGGCACCCAGCACAATGAA
β-actin-R	CTAAGTCATAGTCCGCCTAGAAGCA
RPS10-F	AAGAAGGATGTCCACATGCCTA
RPS10-R	GAAGGTAATCACGGAGATACTG
RPL24-F	AAGAAGGATGTCCACATGCCTA
RPL24-R	GAAGGTAATCACGGAGATACTG
pre-rRNA-F	GCCTTCTCTAGCGATCTGAGAG
pre-rRNA-R	CCATAACGGAGGCAGAGACA
