# Supplementary material for: Ribosomal Dysregulation in Metastatic Laryngeal Squamous Cell Carcinoma: Proteomic Insights and CX-5461’s Therapeutic Promise
Source: Toxics. 2024 May 13;12(5):363. doi: 10.3390/toxics12050363 (PMC11126056; doi:10.3390/toxics12050363)
Supplement: Supplementary file 1 [file toxics-12-00363-s001.zip › Table S3.xlsx]

## Sheet: Table S3
Table S3 Clinical data of patients in the TCGA-HNSC Larynx cohort and CPTAC-HNSC Larynx cohort.
Figure 1A						Figure 1B
Source	PATIENT_ID	overall_free_status	overall_survival	Lymphatic metastasis		Source	PATIENT_ID	progression_free_survival	progression_free_status	Lymphatic metastasis
CPTAC	C3N-00297	3.72055	0	NO		CPTAC	C3N-00297	3.72055	0	NO
CPTAC	C3N-00519	1.74795	0	NO		CPTAC	C3N-00519	1.74795	0	NO
CPTAC	C3N-01946	0.594521	0	NO		CPTAC	C3N-01946	0.59452	0	NO
CPTAC	C3N-04275	0.857534	0	NO		CPTAC	C3N-04275	0.85753	0	NO
CPTAC	C3N-04280	0.635616	0	NO		CPTAC	C3N-04280	0.63562	0	NO
CPTAC	C3N-00306	2.66575	0	NO		CPTAC	C3N-00306	2.66575	0	NO
CPTAC	C3N-00822	2.67945	1	NO		CPTAC	C3N-00822	2.67945	1	NO
CPTAC	C3N-01620	1.94521	0	NO		CPTAC	C3N-01620	1.94521	0	NO
CPTAC	C3N-01645	1.6	0	NO		CPTAC	C3N-01645	1.02466	1	NO
CPTAC	C3N-02279	1.13425	0	NO		CPTAC	C3N-02279	1.13425	0	NO
CPTAC	C3N-01340	2.76438	0	NO		CPTAC	C3N-01340	2.76438	0	NO
CPTAC	C3N-02275	1.69041	0	NO		CPTAC	C3N-02275	1.69041	0	NO
CPTAC	C3N-03012	0.747945	0	NO		CPTAC	C3N-03012	0.74795	0	NO
CPTAC	C3N-03781	2.07123	0	NO		CPTAC	C3N-03781	2.07123	0	NO
CPTAC	C3N-04276	0.775342	0	NO		CPTAC	C3N-04276	0.77534	0	NO
CPTAC	C3N-01338	1.5726	0	YES		CPTAC	C3N-01338	1.34795	1	YES
CPTAC	C3N-01945	0.0547945	0	YES		CPTAC	C3N-01945	0.05479	0	YES
CPTAC	C3N-00204	0.479452	1	YES		CPTAC	C3N-00204	0.47945	1	YES
CPTAC	C3N-01755	2.70411	0	YES		CPTAC	C3N-01755	2.70411	0	YES
CPTAC	C3N-03841	2.06301	1	YES		CPTAC	C3N-03841	0.28767	1	YES
CPTAC	C3N-03878	1.06849	0	YES		CPTAC	C3N-03878	1.06849	0	YES
CPTAC	C3N-01339	0.589041	1	YES		CPTAC	C3N-01339	0.58904	1	YES
CPTAC	C3L-01138	1.00548	0	YES		CPTAC	C3L-01138	1.00548	0	YES
CPTAC	C3N-00857	1.26849	0	YES		CPTAC	C3N-00857	1.26849	0	YES
CPTAC	C3N-02713	2.03836	0	YES		CPTAC	C3N-02713	2.03836	0	YES
CPTAC	C3N-03011	1.63836	1	YES		CPTAC	C3N-03011	1.08493	1	YES
CPTAC	C3N-03876	1.27397	1	YES		CPTAC	C3N-03876	1.27397	1	YES
CPTAC	C3N-01337	1.68767	0	YES		CPTAC	C3N-01337	1.68767	0	YES
CPTAC	C3N-03849	0.917808	0	YES		CPTAC	C3N-03849	0.72603	1	YES
CPTAC	C3N-01859	0.208219	0	YES		CPTAC	C3N-01859	0.20822	0	YES
CPTAC	C3N-01943	1.80548	0	YES		CPTAC	C3N-01943	1.80548	0	YES
CPTAC	C3N-01858	1.63836	0	YES		CPTAC	C3N-01858	0.54795	1	YES
TCGA	TCGA-BA-6869	1.76438	0	NO		TCGA	TCGA-BA-6869	1.76438	0	NO
TCGA	TCGA-BB-7870	5.52329	0	NO		TCGA	TCGA-BB-7870	5.52329	0	NO
TCGA	TCGA-CN-4722	4.06301	0	NO		TCGA	TCGA-CN-4722	4.06301	0	NO
TCGA	TCGA-CN-4723	4.65479	0	NO		TCGA	TCGA-CN-4723	4.65479	0	NO
TCGA	TCGA-CN-4727	4.27397	0	NO		TCGA	TCGA-CN-4727	4.27397	0	NO
TCGA	TCGA-CN-4738	1.19452	1	NO		TCGA	TCGA-CN-4738	1.19452	0	NO
TCGA	TCGA-CN-4739	3.81918	1	NO		TCGA	TCGA-CN-4739	3.56712	1	NO
TCGA	TCGA-CN-5355	3.50137	0	NO		TCGA	TCGA-CN-5355	3.50137	0	NO
TCGA	TCGA-CN-5356	3.86027	0	NO		TCGA	TCGA-CN-5356	3.86027	0	NO
TCGA	TCGA-CN-5360	5.94247	0	NO		TCGA	TCGA-CN-5360	5.94247	0	NO
TCGA	TCGA-CR-7364	3.93151	0	NO		TCGA	TCGA-CR-7364	3.93151	0	NO
TCGA	TCGA-CR-7398	0.427397	0	NO		TCGA	TCGA-CR-7398	0.427397	0	NO
TCGA	TCGA-CV-5432	10.7671	0	NO		TCGA	TCGA-CV-5432	10.7671	0	NO
TCGA	TCGA-CV-5443	7.6274	0	NO		TCGA	TCGA-CV-5443	7.6274	0	NO
TCGA	TCGA-CV-7242	3	0	NO		TCGA	TCGA-CV-7242	3	0	NO
TCGA	TCGA-CV-7245	2.18356	0	NO		TCGA	TCGA-CV-7245	2.18356	0	NO
TCGA	TCGA-CV-7247	1.58082	1	NO		TCGA	TCGA-CV-7247	1.58082	1	NO
TCGA	TCGA-CV-7250	7.94521	1	NO		TCGA	TCGA-CV-7250	0.30411	1	NO
TCGA	TCGA-CV-7261	4.14247	0	NO		TCGA	TCGA-CV-7261	4.14247	0	NO
TCGA	TCGA-CV-7421	0.00547945	1	NO		TCGA	TCGA-CV-7421	0.00547945	0	NO
TCGA	TCGA-CV-7430	1.35616	1	NO		TCGA	TCGA-CV-7430	1.35616	1	NO
TCGA	TCGA-CV-A45W	3.83014	1	NO		TCGA	TCGA-CV-A45W	3.83014	0	NO
TCGA	TCGA-CV-A45Y	7.40548	1	NO		TCGA	TCGA-CV-A45Y	6.35068	1	NO
TCGA	TCGA-CV-A45Z	4.01644	1	NO		TCGA	TCGA-CV-A45Z	4.01644	1	NO
TCGA	TCGA-CV-A6K1	1.87671	0	NO		TCGA	TCGA-CV-A6K1	1.09863	1	NO
TCGA	TCGA-D6-6517	0.8	0	NO		TCGA	TCGA-D6-6517	0.441096	1	NO
TCGA	TCGA-D6-6824	0.210959	0	NO		TCGA	TCGA-D6-6824	0.210959	0	NO
TCGA	TCGA-D6-8568	2.07945	0	NO		TCGA	TCGA-D6-8568	2.07945	0	NO
TCGA	TCGA-D6-A6ES	1.06575	0	NO		TCGA	TCGA-D6-A6ES	1.06575	0	NO
TCGA	TCGA-D6-A74Q	1.94521	0	NO		TCGA	TCGA-D6-A74Q	1.94521	0	NO
TCGA	TCGA-F7-8298	2.72603	0	NO		TCGA	TCGA-F7-8298	2.72603	0	NO
TCGA	TCGA-F7-A50I	0.252055	0	NO		TCGA	TCGA-F7-A50I	0.252055	0	NO
TCGA	TCGA-H7-A6C5	1.7589	0	NO		TCGA	TCGA-H7-A6C5	1.7589	0	NO
TCGA	TCGA-HD-7229	2.8137	0	NO		TCGA	TCGA-HD-7229	0.443836	1	NO
TCGA	TCGA-QK-A8ZB	1.48493	0	NO		TCGA	TCGA-QK-A8ZB	1.48493	0	NO
TCGA	TCGA-QK-AA3J	1.27671	0	NO		TCGA	TCGA-QK-AA3J	1.27671	0	NO
TCGA	TCGA-UF-A718	5.4	0	NO		TCGA	TCGA-UF-A718	5.4	0	NO
TCGA	TCGA-UF-A71D	4.00274	0	NO		TCGA	TCGA-UF-A71D	4.00274	0	NO
TCGA	TCGA-UF-A7J9	3.72055	0	NO		TCGA	TCGA-UF-A7J9	3.72055	0	NO
TCGA	TCGA-UF-A7JH	2.45479	0	NO		TCGA	TCGA-UF-A7JH	2.45479	0	NO
TCGA	TCGA-UF-A7JJ	1.50411	0	NO		TCGA	TCGA-UF-A7JJ	1.50411	0	NO
TCGA	TCGA-CN-6022	0.769863	1	YES		TCGA	TCGA-CN-6022	0.276712	1	YES
TCGA	TCGA-CN-A497	2.91781	0	YES		TCGA	TCGA-CN-A497	2.91781	0	YES
TCGA	TCGA-CN-A49B	2.47671	0	YES		TCGA	TCGA-CN-A49B	2.47671	0	YES
TCGA	TCGA-CR-7371	0.257534	1	YES		TCGA	TCGA-CR-7371	0.257534	0	YES
TCGA	TCGA-CV-5444	6.67671	0	YES		TCGA	TCGA-CV-5444	6.67671	0	YES
TCGA	TCGA-CV-7410	17.5808	1	YES		TCGA	TCGA-CV-7410	17.5808	1	YES
TCGA	TCGA-CV-7422	2.8411	1	YES		TCGA	TCGA-CV-7422	2.00822	1	YES
TCGA	TCGA-D6-A6EK	2.39726	0	YES		TCGA	TCGA-D6-A6EK	2.39726	0	YES
TCGA	TCGA-D6-A6EQ	1.00822	0	YES		TCGA	TCGA-D6-A6EQ	1.00822	0	YES
TCGA	TCGA-F7-7848	3.09863	0	YES		TCGA	TCGA-F7-7848	3.09863	0	YES
TCGA	TCGA-KU-A66S	1.11233	1	YES		TCGA	TCGA-KU-A66S	1.06575	1	YES
TCGA	TCGA-QK-A8Z8	0.468493	1	YES		TCGA	TCGA-QK-A8Z8	0.468493	1	YES
TCGA	TCGA-CV-A460	5.03562	1	YES		TCGA	TCGA-CV-A460	3.90411	1	YES
TCGA	TCGA-CN-5361	5.80822	1	YES		TCGA	TCGA-CN-5361	5.64932	1	YES
TCGA	TCGA-CV-5430	11.6192	0	YES		TCGA	TCGA-CV-5430	2.14521	1	YES
TCGA	TCGA-UF-A7JF	4.61918	0	YES		TCGA	TCGA-UF-A7JF	4.61918	0	YES
TCGA	TCGA-CN-4735	4.7589	0	YES		TCGA	TCGA-CN-4735	4.7589	0	YES
TCGA	TCGA-CN-6988	0.871233	0	YES		TCGA	TCGA-CN-6988	0.871233	0	YES
TCGA	TCGA-CN-6992	2.92055	0	YES		TCGA	TCGA-CN-6992	2.92055	0	YES
TCGA	TCGA-CN-A63T	0.616438	0	YES		TCGA	TCGA-CN-A63T	0.616438	0	YES
TCGA	TCGA-CN-A63U	2.6411	0	YES		TCGA	TCGA-CN-A63U	2.6411	0	YES
TCGA	TCGA-CN-A641	1.00548	0	YES		TCGA	TCGA-CN-A641	1.00548	0	YES
TCGA	TCGA-CN-A6V3	2.03288	0	YES		TCGA	TCGA-CN-A6V3	2.03288	0	YES
TCGA	TCGA-CR-6474	1.54521	1	YES		TCGA	TCGA-CR-6474	0.60274	1	YES
TCGA	TCGA-CV-5434	9.07945	1	YES		TCGA	TCGA-CV-5434	5.09315	1	YES
TCGA	TCGA-CV-5435	6.35342	1	YES		TCGA	TCGA-CV-5435	0.778082	1	YES
TCGA	TCGA-CV-5440	8.9589	0	YES		TCGA	TCGA-CV-5440	8.9589	0	YES
TCGA	TCGA-CV-5441	7.90685	0	YES		TCGA	TCGA-CV-5441	7.90685	0	YES
TCGA	TCGA-CV-7418	2.16164	1	YES		TCGA	TCGA-CV-7418	1.35342	1	YES
TCGA	TCGA-CV-7424	1.2411	1	YES		TCGA	TCGA-CV-7424	1.2411	1	YES
TCGA	TCGA-CV-7433	1.64658	1	YES		TCGA	TCGA-CV-7433	1.21918	1	YES
TCGA	TCGA-D6-6826	0.953425	1	YES		TCGA	TCGA-D6-6826	0.953425	0	YES
TCGA	TCGA-F7-A623	1.68767	0	YES		TCGA	TCGA-F7-A623	1.68767	0	YES
TCGA	TCGA-TN-A7HJ	1.10411	0	YES		TCGA	TCGA-TN-A7HJ	1.10411	0	YES
TCGA	TCGA-UF-A7JK	1.16164	1	YES		TCGA	TCGA-UF-A7JK	0.934247	1	YES
TCGA	TCGA-BA-5555	1.42466	0	YES		TCGA	TCGA-BA-5555	0.679452	1	YES
TCGA	TCGA-BB-4217	0.512329	0	YES		TCGA	TCGA-BB-4217	0.512329	0	YES
TCGA	TCGA-BB-7862	3.06027	0	YES		TCGA	TCGA-BB-7862	3.06027	0	YES
TCGA	TCGA-BB-7864	4.18356	0	YES		TCGA	TCGA-BB-7864	4.18356	0	YES
TCGA	TCGA-CN-6010	4.1726	0	YES		TCGA	TCGA-CN-6010	1.47945	1	YES
TCGA	TCGA-CN-6012	4	0	YES		TCGA	TCGA-CN-6012	4	0	YES
TCGA	TCGA-CN-6023	4.33973	0	YES		TCGA	TCGA-CN-6023	4.33973	0	YES
TCGA	TCGA-CN-6989	2.68493	1	YES		TCGA	TCGA-CN-6989	1.19452	1	YES
TCGA	TCGA-CN-6997	2.70685	1	YES		TCGA	TCGA-CN-6997	0.764384	1	YES
TCGA	TCGA-CN-A63W	1.03288	1	YES		TCGA	TCGA-CN-A63W	1.03288	0	YES
TCGA	TCGA-CR-7399	0.49589	0	YES		TCGA	TCGA-CR-7399	0.49589	0	YES
TCGA	TCGA-CV-5431	1.43014	1	YES		TCGA	TCGA-CV-5431	1.43014	0	YES
TCGA	TCGA-CV-6935	0.808219	1	YES		TCGA	TCGA-CV-6935	0.808219	1	YES
TCGA	TCGA-CV-7089	5.40274	1	YES		TCGA	TCGA-CV-7089	5.40274	0	YES
TCGA	TCGA-CV-7248	1.4274	1	YES		TCGA	TCGA-CV-7248	1.4274	0	YES
TCGA	TCGA-CV-7415	1.90411	1	YES		TCGA	TCGA-CV-7415	1.90411	1	YES
TCGA	TCGA-T3-A92M	1.14247	0	YES		TCGA	TCGA-T3-A92M	1.14247	1	YES
TCGA	TCGA-CN-5363	0.693151	1	YES		TCGA	TCGA-CN-5363	0.145205	1	YES
TCGA	TCGA-CV-5978	0.589041	1	YES		TCGA	TCGA-CV-5978	0.589041	1	YES
