# Supplementary material for: Ribosomal Dysregulation in Metastatic Laryngeal Squamous Cell Carcinoma: Proteomic Insights and CX-5461’s Therapeutic Promise
Source: Toxics. 2024 May 13;12(5):363. doi: 10.3390/toxics12050363 (PMC11126056; doi:10.3390/toxics12050363)
Supplement: Supplementary file 1 [file toxics-12-00363-s001.zip › Table S4.xlsx]

## Sheet: Proteome
Table S4 The proteome data in LSCC cohort
Protein expression values were subjected to upper-quartile normalization and log2 transformation, two-sample Student's t-test was conducted to calculate the P_value
Majority protein IDs	Protein names	Gene names	Mol. weight [kDa]	Sequence length	T1	T2	T3	T4	T5	T6	T7	T8	T9	T10	T11	T12	T13	T14	T15	T16	T17	T18	T19	T20	Pt1	Pt2	Pt3	Pt4	Pt5	Pt6	Pt7	Pt8	Pt9	Pt10	Pt11	Pt12	Pt13	Pt14	Pt15	Pt16	Pt17	Pt18	Pt19	Pt20	Ratio(LNM/NO)	P_value(LNM/NO)	Ratio(T/Pt)	P_value(T/Pt)
Q14210	Lymphocyte antigen 6D	LY6D	13.286	128	13.5203	15.5124	11.4519	13.1114	12.7307	14.7489	11.3195	12.2954	13.2632	11.2292	9.53839	10.8986	11.6385	11.3033	11.8888	13.0495	10.8897	11.6691	9.62963	10.725	13.1056	14.0236	11.7264	13.2076	10.2832	9.62963	10.4933	12.6163	14.11	11.6855	12.2409	10.3216	11.4325	13.7943	11.2392	10.7995	11.396	11.5728	14.3806	10.2953	3.47073	0.00505843	1.074	0.828416
P30405	Peptidyl-prolyl cis-trans isomerase F, mitochondrial	PPIF	22.04	207	19.9906	20.4968	19.7887	20.5723	19.937	20.4153	19.8907	19.4741	20.374	18.9635	18.9267	19.1942	19.2445	18.7337	19.4157	19.6122	19.3074	19.6576	18.9303	19.3791	19.1659	19.1441	19.1968	19.2731	19.1801	19.0292	19.5871	19.1432	19.004	19.0211	19.1927	19.5816	19.0813	19.3121	19.5199	19.4843	19.1448	19.1166	19.2771	19.0543	1.68198	0.000784585	1.31017	0.00522871
P29508	Serpin B3	SERPINB3	44.564	390	20.9883	19.9105	20.374	21.0658	21.1526	19.5306	19.9455	20.7068	19.833	19.1246	19.6202	19.1291	19.6332	20.0071	19.3051	19.5564	19.4624	19.6004	19.4898	19.408	19.8897	20.5524	20.275	19.6437	19.856	19.4784	19.3241	20.149	20.5092	19.7742	20.5742	19.9525	20.1091	19.6362	19.043	20.2958	19.8984	19.8954	20.8425	19.5069	1.6725	0.0051747	0.953881	0.699711
P62854	40S ribosomal protein S26	RPS26	13.015	115	16.3517	16.0701	15.9377	16.144	15.5207	16.076	16.142	15.8974	15.5239	15.445	15.0132	14.9878	15.5977	15.0417	14.7881	16.1742	15.1595	15.6082	14.8955	14.9163	14.9563	15.5234	15.5782	15.3805	15.1788	14.84	15.3843	15.2013	15.437	14.8149	15.0937	14.8066	14.7209	15.4078	15.7581	15.4388	14.6996	14.8598	15.9722	15.6644	1.61626	0.000703823	1.25589	0.0261108
P23588	Eukaryotic translation initiation factor 4B	EIF4B	69.15	611	19.3327	18.9428	18.079	18.8661	18.2061	18.4171	18.5387	18.5992	17.8179	18.0862	17.5314	17.8074	18.0595	17.5413	17.3159	18.7028	17.7035	18.0712	17.9278	17.9781	17.5256	17.7203	17.9749	17.7198	17.5553	17.6394	17.2994	17.6004	17.9877	17.0454	17.8151	17.8931	17.6873	17.5472	17.2657	17.4312	17.2207	18.4825	17.7994	16.8129	1.54187	0.00426322	1.48975	0.0002771
P46776	60S ribosomal protein L27a	RPL27A	16.561	148	19.4622	18.6156	18.5322	19.456	18.5302	18.7231	18.9667	18.3272	18.2342	18.2136	17.8506	18.248	18.3875	17.7125	18.1206	19.1316	17.9677	18.2096	17.4228	17.9423	18.0865	18.6934	18.6166	17.9643	17.7537	18.1485	17.6602	17.837	17.9238	17.5909	17.9167	17.4794	17.7266	18.0792	17.5674	17.953	17.8283	17.6858	18.2557	17.874	1.52286	0.00833362	1.38575	0.00189058
P43003	Excitatory amino acid transporter 1	SLC1A3	59.572	542	13.3831	12.8511	13.2712	13.2894	13.1039	14.1427	13.7064	13.5537	13.8009	13.1287	13.0228	12.7746	12.7492	12.4585	12.5767	12.738	12.6883	13.4758	13.0681	12.6913	13.5654	13.6809	13.2847	13.3992	12.9048	13.0161	12.6616	13.9453	13.7486	13.5059	13.8634	13.1183	13.2768	14.6812	12.5767	13.0979	13.2942	13.5919	14.8118	12.7239	1.51442	0.00097587	0.804567	0.0674848
P09234	U1 small nuclear ribonucleoprotein C	SNRPC	17.394	159	17.2299	17.3104	16.723	17.289	16.6269	16.7734	17.2897	16.948	16.2122	16.1636	15.4019	16.522	16.3658	16.3302	16.2585	17.211	16.2768	16.2632	15.8119	16.1484	15.5445	16.1367	16.614	15.7502	15.8208	16.0817	15.9867	15.8054	16.0306	15.523	16.0367	15.8541	16.0026	15.6557	15.5736	15.9475	15.9872	15.8337	15.9058	15.9332	1.51326	0.00817126	1.57637	1.35227e-05
Q9BPW9	Dehydrogenase/reductase SDR family member 9	DHRS9	35.227	319	17.4619	16.735	18.022	17.4948	18.4328	17.8144	18.0866	16.7756	17.435	17.3027	16.8717	16.5665	17.1394	17.1602	16.8308	17.5656	17.0866	16.797	16.8214	16.7781	16.9783	16.9527	18.363	16.6693	16.7473	16.9466	16.9939	16.8705	17.1643	17.1004	17.5507	17.3788	17.0752	17.08	17.0752	17.2772	16.8953	17.3009	16.8842	16.6742	1.50976	0.00692276	1.11728	0.27248
Q13242	Serine/arginine-rich splicing factor 9	SRSF9	25.542	221	16.2046	16.8897	15.5879	15.6069	16.5038	15.9841	16.0861	16.1243	16.556	15.7002	15.4477	15.6304	15.713	15.0074	15.5349	16.2168	15.2242	15.86	15.1273	15.8009	15.7529	15.6259	15.4291	15.5608	15.3971	15.6207	15.3259	15.4745	15.3663	15.3143	16.0949	15.7121	15.2687	15.6098	14.9441	15.8573	15.6848	15.2514	15.9158	15.3022	1.48257	0.00539566	1.2439	0.0158875
P42766	60S ribosomal protein L35	RPL35	14.551	123	18.3658	18.0984	17.9767	18.3302	18.0072	17.913	18.0874	17.8115	17.2375	17.5805	16.9092	17.8905	17.1008	16.7525	17.6452	17.9583	17.3519	17.7959	16.786	17.7358	17.0369	17.3362	17.9159	17.0927	17.0538	17.4681	16.9352	17.4485	17.2839	16.5392	17.2267	16.9408	17.1873	17.1886	17.0129	17.2268	17.1333	16.8491	17.4443	16.6899	1.46227	0.00794782	1.4302	0.000269565
O95197	Reticulon-3	RTN3	112.61	1032	14.1594	14.1071	14.4851	15.3737	14.5945	14.4238	13.691	14.3339	14.3176	14.9555	13.4554	13.9326	14.0893	14.5996	13.5575	14.1569	13.8219	13.7051	13.9766	13.6865	13.0145	13.5431	14.6032	13.5798	14.1034	13.2084	13.7344	13.301	13.8131	13.6083	13.2523	13.5956	14.2551	13.2293	15.0042	14.0664	13.4214	13.3905	13.3673	14.0459	1.46005	0.00736729	1.37965	0.00521708
Q9BWJ5	Splicing factor 3B subunit 5	SF3B5	10.135	86	15.9379	16.0933	15.4852	15.9254	15.7589	15.9568	15.9559	15.7524	15.4505	15.2305	14.8245	15.524	15.3089	14.9919	14.8903	15.7822	14.9215	15.9949	14.8105	15.1334	15.0076	15.3861	15.6674	15.1812	15.0064	15.1159	14.9398	15.266	15.2824	15.1941	15.4128	14.5277	14.92	15.5605	15.5829	15.1799	15.054	15.0258	15.604	15.0165	1.45043	0.00350163	1.22254	0.0182908
P55209	Nucleosome assembly protein 1-like 1	NAP1L1	45.374	391	19.086	19.2011	18.1188	18.3145	18.0471	19.164	18.6676	18.7752	17.8644	18.2136	18.067	18.0525	18.3502	17.7381	17.7142	18.2495	18.0355	18.4078	17.7346	17.7449	18.0163	18.1253	17.9347	18.2485	18.3451	17.8861	18.0506	18.349	18.3244	17.5753	18.1762	18.0265	18.1539	18.4408	17.739	18.5858	17.7835	17.477	18.5364	17.6699	1.44976	0.00771749	1.15277	0.116846
P47914	60S ribosomal protein L29	RPL29	17.752	159	18.5767	18.5011	18.0647	18.7367	18.2752	18.2976	18.1119	17.9687	17.9846	18.1547	17.8239	17.829	17.5581	17.4171	17.5581	18.3594	17.5428	17.7081	17.3214	18.2537	17.8147	18.1172	18.0062	17.8448	17.7887	17.7867	17.2806	17.7059	17.796	17.4375	18.0639	17.5441	17.5002	18.2632	17.0281	17.8275	17.3576	17.7118	18.0921	17.9152	1.44396	0.00106108	1.19588	0.0288276
P45880	Voltage-dependent anion-selective channel protein 2	VDAC2	31.566	294	19.7505	19.6254	19.2299	19.7737	19.3204	20.158	19.4685	19.8198	19.2453	18.8249	18.7927	18.9928	19.1557	18.7076	18.3012	19.6018	19.0597	19.1053	18.7414	19.4904	18.937	19.0845	19.0742	19.0108	18.9452	19.038	19.5274	18.8817	18.9588	18.6434	19.2431	18.835	18.5657	19.1726	19.9541	18.9832	18.8618	18.8212	18.9675	19.1235	1.44071	0.0064803	1.17026	0.0724705
P46783	40S ribosomal protein S10	RPS10	18.898	165	18.7546	18.1927	18.099	18.1454	18.1755	17.7802	18.1454	18.023	18.3404	18.1164	17.2799	17.7793	17.9785	17.3481	17.4446	17.7073	17.7413	18.2967	17.4979	17.5698	17.305	17.7952	18.5456	17.5301	17.3195	18.1171	17.4239	17.8863	17.9475	17.1521	17.2686	17.4204	17.1872	17.4724	17.6324	17.6037	17.8038	17.3662	17.9486	17.364	1.42692	0.00059634	1.24515	0.00972118
Q5VYY1	Ankyrin repeat domain-containing protein 22	ANKRD22	21.848	191	15.224	14.8596	14.4234	15.2505	14.8284	15.1632	15.1599	14.4406	14.9811	14.2302	14.273	14.1913	14.1042	14.5475	14.2546	14.3596	14.4891	14.2415	14.6288	14.3591	15.3007	15.1782	14.4083	15.1486	14.6466	14.6076	14.4839	14.8628	14.7691	14.5912	14.9341	14.3552	14.4104	15.1974	14.2683	14.45	14.5985	14.9255	15.6556	14.9389	1.42524	0.000902311	0.878996	0.127284
P62857	40S ribosomal protein S28	RPS28	7.8409	69	16.71	16.4236	15.7645	15.8866	15.3012	16.0852	16.3044	16.1695	16.1285	16.1354	15.6026	15.4542	15.5308	15.3946	15.2852	15.9353	15.2597	15.8039	15.7457	15.8065	15.6423	15.6968	15.8747	15.8564	15.6725	15.8207	15.226	15.4873	15.7622	15.0795	15.7547	15.2938	15.265	15.9363	15.1601	15.9431	14.9569	15.7809	16.2811	15.0935	1.4231	0.00213612	1.19515	0.0404259
Q658Y4	Protein FAM91A1	FAM91A1	93.908	838	18.2578	18.5359	17.2362	18.064	18.8475	18.141	17.8589	17.9035	18.1203	17.9231	17.059	17.502	17.3578	18.1464	17.8414	17.6648	17.3519	17.9173	17.3351	17.6294	17.2205	18.5687	17.1933	17.1717	17.2365	17.4845	17.0112	17.6692	17.6852	17.3635	17.163	17.1553	17.3178	16.9799	16.9656	17.399	17.6928	17.1243	17.1339	16.8919	1.42239	0.00785683	1.42728	0.000379399
Q15738	Sterol-4-alpha-carboxylate 3-dehydrogenase, decarboxylating	NSDHL	41.9	373	17.8117	17.6726	17.0737	17.6438	17.7449	18.1933	17.6832	17.9142	18.341	16.7284	16.9795	17.4241	17.0668	16.9571	17.4654	17.3294	16.9958	17.6077	16.8454	17.0802	17.7005	17.65	17.083	17.2032	16.7036	17.2538	17.0119	17.2454	17.4818	16.942	17.4951	17.1087	17.1829	17.6895	16.7459	16.8511	17.2144	17.6281	17.6594	16.9981	1.41965	0.00869992	1.13721	0.144674
Q9HCD6	Protein TANC2	TANC2	219.65	1990	16.8078	16.2454	15.9022	16.8424	16.5294	16.4198	16.5006	16.3901	16.7052	15.46	15.4735	16.0905	15.6961	16.2863	16.0875	15.917	15.7192	16.2772	15.5625	15.6467	16.0496	15.9524	15.9712	15.6371	15.3482	15.731	15.7862	16.0323	15.8901	15.8491	15.7762	15.5264	15.6663	15.7588	15.3725	15.2793	15.7171	16.701	16.0992	15.6968	1.41878	0.00654058	1.26219	0.00857789
P83731	60S ribosomal protein L24	RPL24	17.779	157	17.442	17.3306	16.8838	17.2579	16.8256	17.2351	17.0604	17.1001	17.3558	17.1392	16.8477	16.8115	16.6549	16.27	16.5045	17.3101	16.7026	16.9062	16.4196	16.4771	16.8781	16.8518	16.9966	16.9715	16.5925	17.3809	17.0423	16.5294	16.7681	16.0828	17.1147	16.7582	16.4345	17.1416	17.9107	17.0929	16.9548	16.2483	17.4102	16.872	1.38764	0.00059767	1.01759	0.836307
P40429	60S ribosomal protein L13a	RPL13A	23.577	203	17.3748	17.1943	16.9728	17.1926	16.6403	16.8511	16.7943	16.7929	16.4451	17.2172	16.3981	16.5593	16.6087	16.3823	16.4956	17.1069	16.3123	16.4542	15.9169	16.6825	16.4114	16.5173	16.7176	16.8711	16.7555	16.6464	16.451	16.7038	16.7881	16.1242	16.4883	16.3294	16.5939	16.8204	16.3056	17.0227	16.3836	16.6856	17.1665	16.3109	1.3716	0.00304778	1.08292	0.266467
P49207	60S ribosomal protein L34	RPL34	13.293	117	18.724	18.9258	18.0821	18.9544	18.832	18.7518	18.8519	18.5495	18.7089	18.2328	18.1759	18.6031	18.0466	17.9751	18.3837	18.5534	17.9281	18.5278	17.8013	18.0739	18.4664	18.3738	18.3208	18.0989	18.0534	18.7941	18.2613	18.1816	18.3306	17.7872	18.6849	17.7367	17.5716	18.4497	17.6443	18.1847	17.9112	17.7499	18.5416	18.3193	1.37023	0.00256915	1.19832	0.0265668
Q9H5Q4	Dimethyladenosine transferase 2, mitochondrial	TFB2M	45.348	396	16.8663	17.1419	16.6758	17.9413	17.4525	17.247	17.2022	16.9121	17.4354	17.0549	16.7031	17.1604	16.7102	16.4605	17.3968	16.6836	16.8156	16.3808	16.6787	16.4156	16.6954	16.4269	16.5502	16.4346	16.5813	16.8634	16.5643	16.5535	16.8088	16.3213	16.5832	16.6786	16.6173	16.4876	17.4075	16.4971	16.5035	16.8507	16.4267	17.0942	1.36833	0.0083443	1.24784	0.00502007
P39023	60S ribosomal protein L3	RPL3	46.108	403	20.0656	20.2773	19.442	20.261	19.7637	20.0116	20.1557	19.95	19.7418	19.9764	19.7055	19.6319	19.4285	19.3453	19.3357	19.9179	19.3267	19.8725	19.025	19.5476	20.127	19.6629	19.38	19.6509	19.4398	20.1189	19.1227	19.5852	19.6174	19.2076	20.127	19.3227	19.1654	19.996	19.0016	19.6737	19.5442	19.1672	19.8888	19.2623	1.36685	0.00138407	1.13761	0.103248
P12236	ADP/ATP translocase 3	SLC25A6	32.866	298	19.0312	19.1451	18.423	19.075	18.8154	19.0639	19.1029	19.2339	19.0352	18.4872	18.4343	18.6412	18.7766	18.0581	18.6522	18.8592	18.4914	18.3816	18.1424	18.4891	18.4676	18.4109	18.6465	18.6777	18.6308	18.5607	18.6534	18.3814	18.5961	18.3477	18.6243	18.4093	18.433	18.6636	19.0868	18.9404	18.4845	18.0752	18.9066	18.4442	1.36479	0.00144343	1.10566	0.127224
Q14739	Lamin-B receptor	LBR	70.702	615	16.8211	17.0874	16.7708	16.5376	17.1503	17.1966	17.0694	16.5956	17.0613	16.2264	16.0923	16.5882	16.8137	16.1956	16.5512	16.369	16.3872	16.1487	16.3973	16.5586	16.6811	16.3455	16.52	16.234	16.0192	16.9109	16.1636	16.5845	16.2352	15.8889	16.5799	16.2744	17.0318	16.513	15.8715	16.5217	16.7234	17.005	16.4257	16.2415	1.358	0.00216149	1.14265	0.084306
P84090	Enhancer of rudimentary homolog	ERH	12.259	104	18.2451	18.0369	17.7101	17.8669	17.8968	18.2855	17.9234	17.9732	18.0794	17.4997	17.1325	17.5032	17.7216	17.6275	17.4235	18.1207	17.3727	17.5966	17.1569	17.4842	17.2809	17.5979	17.8888	17.378	17.3822	17.3685	17.0955	17.3768	17.5361	17.0347	17.4975	17.3471	17.37	17.366	16.8841	17.612	17.378	17.0795	17.4097	17.0949	1.35449	0.00147544	1.30489	0.000161624
P14324	Farnesyl pyrophosphate synthase	FDPS	48.275	419	16.3579	16.6697	16.3106	16.5928	16.4974	16.7274	16.286	16.5211	16.7529	16.2319	15.8453	16.2129	16.2047	15.7543	15.8282	16.1378	15.9176	16.3238	16.1362	16.2112	16.0364	16.235	16.2977	15.9137	16.2203	16.3814	15.6569	16.1668	16.2865	16.0607	16.0264	16.0522	16.1156	16.1013	16.675	16.1378	15.9684	15.6106	16.4118	15.8329	1.35432	9.26881e-05	1.12243	0.0613012
Q9P0M9	39S ribosomal protein L27, mitochondrial	MRPL27	16.073	148	16.3108	16.8916	15.9558	15.9502	16.3402	16.5159	16.8295	16.5783	16.5335	16.3421	15.9059	16.3142	16.0575	15.701	16.1917	16.4702	15.9674	16.0099	15.5012	15.7909	17.0715	16.9805	16.0859	16.7028	16.1237	16.3326	16.3538	16.2244	16.2456	15.5657	16.6503	16.1483	15.7688	16.868	16.1041	16.5316	16.2284	15.7162	17.2657	15.9138	1.35078	0.00490453	0.909924	0.310498
P49406	39S ribosomal protein L19, mitochondrial	MRPL19	33.535	292	16.0536	16.6929	15.4171	15.9036	16.1214	16.2556	16.2062	15.951	15.8742	16.0054	15.6811	15.6924	15.6059	15.4463	15.579	16.387	15.7241	15.5121	15.0412	15.5115	15.9229	15.7182	15.3961	15.6531	15.5418	15.6383	16.1397	15.6541	15.8047	15.344	16.2138	15.7854	15.4983	15.9337	15.5603	15.9871	15.5859	14.9938	15.8474	15.5814	1.34728	0.00908532	1.10425	0.191283
O15118	Niemann-Pick C1 protein	NPC1	142.17	1278	15.2553	15.0144	14.7122	14.5622	14.9152	15.2073	14.6693	15.1135	14.571	14.6247	14.2582	14.517	14.8335	14.4173	14.0378	14.6745	14.2415	14.3345	14.6048	14.4638	14.2893	14.5221	14.6184	14.3345	14.4385	14.3625	14.5965	14.316	14.3726	14.5657	14.2097	14.317	14.5484	14.3216	14.5912	14.6745	14.6766	14.5647	14.4695	14.5749	1.34372	0.00136429	1.1354	0.0277988
Q9Y5K5	Ubiquitin carboxyl-terminal hydrolase isozyme L5	UCHL5	37.606	329	18.6002	18.9012	18.3612	18.2154	18.6792	18.7867	18.4072	18.4687	18.2973	18.4566	17.7453	18.0808	18.5594	18.2176	18.0131	18.0877	18.1352	18.1338	17.8908	18.1096	17.7486	18.2077	18.4254	18.1531	18.0095	18.046	17.8266	18.2138	18.2638	17.5555	17.8528	17.7993	17.652	17.9525	17.9908	18.2368	17.6526	17.7244	18.3661	17.7436	1.33796	0.000387937	1.26252	0.000530636
O75608	Acyl-protein thioesterase 1	LYPLA1	24.669	230	18.8191	18.6752	18.2516	18.2425	18.4778	18.6893	18.4032	18.7218	17.9163	18.4032	18.0673	18.2078	18.3646	17.8914	17.3398	18.4516	17.6919	18.2834	18.0722	18.0734	17.624	18.1502	18.5072	17.9636	18.3232	17.7898	18.0112	18.243	18.3968	17.7899	17.9359	17.8806	17.8888	18.2209	17.7244	18.5302	17.7489	17.2864	18.2281	17.623	1.3339	0.00711839	1.19654	0.0237049
P62910	60S ribosomal protein L32	RPL32	15.86	135	19.6507	19.7279	18.7994	19.5898	19.0437	19.5253	19.7067	19.3165	18.8924	18.8665	18.8293	18.8941	19.0503	18.7781	18.7123	19.048	18.9209	19.1692	18.7104	18.8912	18.6942	18.9564	18.6819	18.8474	18.785	19.3481	18.9739	18.8953	18.874	18.5634	18.8483	18.6622	18.7075	19.2139	18.9962	18.8144	18.7955	19.0786	18.9913	18.9813	1.3301	0.00491077	1.1653	0.0179602
Q8WX92	Negative elongation factor B	NELFB	65.697	580	18.4869	17.9803	18.3992	18.0419	17.7748	17.9427	18.3513	18.0367	18.3693	17.8564	17.335	17.537	17.8245	18.0444	17.5244	17.9472	17.539	17.4962	17.9529	17.9625	17.6532	18.6176	17.9359	18.9227	18.3551	17.3554	17.2897	17.7696	17.8249	17.6514	17.6214	17.7568	17.3307	18.3208	17.6873	18.2538	17.3588	17.4954	18.6379	17.5976	1.32649	0.00212114	1.03407	0.712204
P99999	Cytochrome c	CYCS	11.749	105	19.3281	18.6965	19.192	19.5237	19.1757	19.405	18.7457	18.8675	18.7178	18.5765	18.5638	18.5595	18.4335	18.3646	18.9301	18.854	18.7278	18.6669	18.2184	18.8754	18.4234	18.5903	19.1282	18.6319	18.8017	18.9681	19.8268	18.7587	18.6727	18.5142	18.8262	18.7628	18.7521	18.6274	19.8153	19.103	18.7195	18.4764	18.5258	19.1669	1.32267	0.00639378	0.977098	0.778199
P62750	60S ribosomal protein L23a	RPL23A	17.695	156	18.6877	18.5175	18.3461	18.7285	18.5139	18.4115	18.6047	18.4847	18.046	18.426	18.1374	18.1173	18.0841	17.5048	17.8581	18.6963	17.9907	18.1107	17.8756	18.3597	18.4595	18.1641	18.0436	18.0642	18.0773	18.3074	17.7569	18.1305	18.2784	17.7606	18.437	18.2902	18.1454	18.2419	17.7105	18.0654	17.8927	18.0207	18.2704	17.627	1.32242	0.0028643	1.13908	0.0447477
A4D1E9	GTP-binding protein 10	GTPBP10	42.932	387	14.6222	14.8644	14.2314	14.5647	13.9644	14.6562	14.7471	14.9582	14.2566	14.1376	14.2735	14.4138	14.2254	13.6788	14.0211	14.2545	14.0007	13.8587	14.1307	14.1295	14.1266	14.186	13.8838	14.2296	14.2628	14.3856	14.2012	14.0833	14.2483	14.2799	14.5361	14.2064	13.7665	14.3346	14.3017	14.4493	14.1082	13.869	14.258	13.9614	1.32101	0.00497246	1.0834	0.198031
P42677	40S ribosomal protein S27	RPS27	9.461	84	13.8816	14.1264	14.0704	14.4539	13.828	13.8858	13.918	13.9199	13.9216	13.3622	13.5689	13.3007	13.633	13.5578	13.2641	13.9643	13.6788	13.3285	13.3005	13.9499	13.6403	13.4111	14.111	13.7325	13.4934	13.5802	13.2913	13.7022	13.4741	13.0578	13.6368	13.437	14.1369	13.9628	13.852	13.5288	13.6788	13.8666	13.9871	13.3108	1.30327	0.00491705	1.07262	0.301403
Q9BY32	Inosine triphosphate pyrophosphatase	ITPA	21.445	194	19.1181	19.1769	18.6754	18.5119	19.1118	19.2935	18.9838	18.6134	18.6982	18.6643	17.9933	18.7988	18.8832	18.3314	18.8852	18.6	18.4388	18.5984	18.2218	18.3148	18.1034	18.5367	18.6953	18.3601	18.572	18.5353	18.0552	18.4008	19.1218	18.2798	18.3212	18.0736	18.3888	18.6295	18.1881	18.5443	18.6658	18.52	18.3995	17.772	1.29969	0.00920003	1.22054	0.00680786
Q96I25	Splicing factor 45	RBM17	44.961	401	16.4656	16.9166	16.4712	16.4058	16.1349	16.6465	16.4424	16.8482	16.1187	16.0758	15.769	16.2433	16.099	16.3784	15.8256	16.3936	16.123	15.9771	15.9105	16.1929	15.685	16.0638	16.5696	15.9289	15.7865	16.2528	15.7574	16.3734	16.2624	15.7206	15.9268	15.7287	15.5198	16.2587	16.7739	15.7105	16.1092	17.2199	16.0364	15.7393	1.28462	0.00571495	1.14929	0.0962006
Q14676	Mediator of DNA damage checkpoint protein 1	MDC1	226.66	2089	14.0978	14.2245	13.9138	13.9697	14.3115	13.8305	14.2462	13.8893	14.6048	14.0523	13.6496	14.0934	13.5762	13.3478	14.3809	13.6661	13.4614	13.7092	13.7283	13.9222	13.7873	13.7054	13.8157	14.0859	14.2051	14.2181	13.8139	13.6154	13.6635	13.6068	14.0136	13.4883	14.0624	13.8458	13.6615	14.1413	13.903	14.0035	13.8467	13.5681	1.2839	0.00858945	1.05791	0.359877
P49458	Signal recognition particle 9 kDa protein	SRP9	10.112	86	17.172	17.2027	17.1259	16.7617	17.0688	17.1991	16.9435	17.0339	16.5273	16.9297	16.5608	16.8577	16.7332	16.3772	16.7842	17.1011	16.3653	16.8901	16.1493	16.5618	16.6996	16.6363	17.3726	16.7432	16.6262	16.698	16.6849	17.2675	16.9858	16.4456	16.9627	16.4393	16.4992	16.9389	16.1918	16.932	16.5191	16.3718	17.102	16.2767	1.28197	0.00562316	1.07	0.332966
O60832	H/ACA ribonucleoprotein complex subunit 4	DKC1	57.673	514	18.2524	18.3733	17.8313	17.8999	18.0108	18.4566	18.1958	18.1362	18.2914	17.9085	17.6128	17.9315	17.7189	17.3616	17.9107	18.3001	17.6132	17.8132	17.5613	18.0002	17.8553	17.7571	17.9253	17.5974	17.5858	17.9141	17.0736	17.6431	17.7331	17.344	18.1572	17.7637	17.3693	18.0681	17.1027	17.8507	17.8243	17.2385	17.7135	17.1402	1.27746	0.00437851	1.25365	0.00193573
P11387	DNA topoisomerase 1	TOP1	90.725	765	19.3643	19.4881	19.1762	19.4982	19.6398	19.5625	19.3809	19.251	19.7662	18.7862	18.9649	19.2412	19.0563	18.6511	19.4101	19.1779	18.9415	19.0646	18.6938	19.1896	19.1733	19.0731	19.1131	18.7783	18.7036	19.4642	18.6934	18.8091	18.6861	18.6421	19.1464	18.9114	19.106	18.9467	18.6888	18.9144	19.1654	18.6327	18.8598	19.2911	1.27656	0.00672082	1.21021	0.00322365
P49368	T-complex protein 1 subunit gamma	CCT3	60.533	545	20.7345	20.9626	20.4401	20.5783	20.6236	20.467	20.2289	20.5067	20.5118	20.3092	20.1463	20.2286	20.3826	19.7868	19.8647	20.5284	20.1101	20.4618	19.9687	20.3704	20.0753	20.2844	20.1598	20.3455	20.062	19.7434	19.8278	20.3092	20.2201	20.0857	20.2258	20.1558	20.1975	20.2844	19.935	20.158	19.9247	19.9093	20.3103	19.9027	1.27582	0.00338691	1.1931	0.00183365
P62316	Small nuclear ribonucleoprotein Sm D2	SNRPD2	13.527	118	18.902	19.1404	18.6608	18.712	18.9932	19.2662	18.9424	18.8495	18.9411	18.42	18.4458	18.528	18.528	18.3543	18.674	19.0994	18.4263	18.5597	18.152	18.5871	18.6009	18.4642	18.9207	18.2861	18.2369	18.5409	18.3867	18.2031	18.2239	18.0025	18.8308	18.2623	18.205	18.6264	18.2652	18.4934	18.6611	17.9694	18.318	17.9369	1.27216	0.00507838	1.26348	0.000564027
Q8NAV1	Pre-mRNA-splicing factor 38A	PRPF38A	37.476	312	17.45	17.6625	17.3734	17.472	17.6007	17.603	17.6463	17.6989	17.3275	17.0905	17.0618	17.3273	17.3683	16.8927	16.8938	17.342	17.1734	17.3362	17.1387	17.0809	17.1432	17.9338	17.1842	17.285	17.0208	17.603	17.3218	17.3042	17.297	17.1877	17.3051	17.0722	17.547	17.2897	16.7996	17.147	17.2759	17.5783	17.2345	17.05	1.25785	0.000855365	1.03383	0.542006
Q15185	Prostaglandin E synthase 3	PTGES3	18.697	160	17.1217	17.6467	16.8358	16.9214	17.1359	17.1695	16.9845	17.1473	17.0553	16.8323	16.752	16.6647	16.8598	16.8615	16.4181	16.9042	16.5054	17.2213	16.4218	16.9373	16.8042	16.7736	16.8045	16.6463	16.6735	16.8333	16.5613	16.9863	16.8818	16.5559	16.9841	16.6916	16.6442	17.0324	16.6119	16.8551	16.6251	16.3688	17.0674	16.5208	1.25739	0.00751621	1.12797	0.0315137
Q99417	C-Myc-binding protein	MYCBP	11.967	103	17.898	18.0212	17.9653	17.6458	18.0489	18.1897	17.9974	17.9744	17.6878	17.9389	17.6818	17.7759	17.3706	17.0979	17.4833	18.0489	17.4423	17.9539	17.4034	17.8097	17.6669	17.5643	17.9472	17.454	17.6858	17.8131	17.105	17.6686	17.5713	17.2117	18.2264	17.7229	17.2961	17.7238	16.7211	17.9772	17.6315	16.9971	17.538	17.2613	1.25699	0.00634044	1.17496	0.0293877
P20042	Eukaryotic translation initiation factor 2 subunit 2	EIF2S2	38.388	333	18.7699	18.8052	17.9585	18.3889	18.4182	18.6008	18.3517	18.3077	18.5537	18.212	17.9065	18.3369	18.1479	17.8914	18.1801	18.2469	18.0394	18.4829	17.8313	18.0172	17.9915	18.0428	17.9383	17.9471	17.8313	18.2951	17.9969	17.9576	18.0001	17.4317	18.0335	18.026	17.9155	18.0289	17.8099	17.8916	17.9378	17.9655	18.1001	17.7761	1.2558	0.00572959	1.25396	7.1916e-05
Q15345	Leucine-rich repeat-containing protein 41	LRRC41	88.649	812	17.2394	16.713	16.3677	16.9241	16.585	16.749	16.7733	16.6235	16.5492	16.3535	16.1213	16.4804	16.3163	16.3977	16.2297	16.5242	16.1824	16.4403	16.2002	16.7158	16.0088	16.9551	16.6861	16.605	16.3461	16.143	16.0112	16.3917	16.5064	16.3643	16.1859	16.2731	16.3585	16.4823	16.4068	16.3971	16.188	16.3337	17.1837	16.4123	1.25437	0.00476442	1.08099	0.214696
P15880	40S ribosomal protein S2	RPS2	31.324	293	19.9401	19.8208	19.3213	19.7961	19.5587	19.7936	19.5266	19.5936	19.8833	19.4921	19.3787	19.5435	19.368	18.967	19.1486	19.568	19.2047	19.6705	19.0409	19.6927	19.5992	19.5187	19.3766	19.4109	19.3164	19.8732	18.9644	19.5802	19.6251	19.3665	19.5971	19.2544	19.4188	19.6644	19.0049	19.3797	19.3901	19.1426	19.5981	19.128	1.24345	0.00732679	1.07548	0.202607
P63241	Eukaryotic translation initiation factor 5A-1	EIF5A	16.832	154	20.5728	20.5728	20.0653	20.3324	20.3553	19.9461	20.295	20.0658	20.235	19.8995	19.7164	20.1157	19.8592	19.9377	19.7915	20.1113	19.7083	20.3324	19.5818	20.0627	19.903	20.1572	19.775	19.8022	19.821	19.996	19.5782	19.8361	19.95	19.4004	19.8592	19.7293	20.0187	19.7915	19.544	19.9543	19.7875	19.4867	20.0689	19.953	1.24169	0.00821843	1.19519	0.00177621
P49006	MARCKS-related protein	MARCKSL1	19.529	195	15.1873	15.1934	15.0706	15.19	15.2466	15.7267	14.9892	15.2721	15.4594	15.4638	14.6545	15.3368	15.0817	15.0022	14.8651	14.8025	14.5667	15.3372	15.1129	14.926	14.4032	14.5359	14.9932	14.6017	14.985	14.7056	14.4951	14.8166	14.6743	14.6927	14.5652	15.1705	15.2691	14.481	14.2966	14.8159	14.4176	14.6156	14.5795	14.5129	1.24086	0.00921551	1.35932	7.50983e-06
P36578	60S ribosomal protein L4	RPL4	47.697	427	19.4936	19.3334	19.3256	19.2167	19.4677	19.1738	19.5051	19.3698	19.293	19.1347	18.8603	19.3991	18.9569	18.8768	19.3907	19.1797	18.7954	19.1362	18.6402	18.991	19.0099	19.1911	19.3886	19.2718	19.1258	19.2311	18.827	18.9759	18.9445	18.827	19.0674	18.8673	18.7805	19.0407	18.61	19.074	19.0243	19.0717	19.2088	18.8088	1.2386	0.00285235	1.11705	0.0297705
Q96GC9	Vacuole membrane protein 1	VMP1	46.237	406	14.9821	15.3495	14.8083	14.9599	14.6726	15.1578	15.3252	15.3784	15.0738	14.5794	14.6254	14.7875	14.5179	14.9006	14.8776	14.6224	14.6494	14.7798	14.8804	14.617	15.2079	14.8547	14.6408	15.0297	14.7435	15.1834	15.0375	14.957	14.8693	14.5481	15.0696	14.9088	14.5765	15.1388	14.4262	14.7153	14.942	14.9749	15.0434	14.8101	1.23361	0.00674244	0.995415	0.93183
P06730	Eukaryotic translation initiation factor 4E	EIF4E	25.097	217	17.9042	18.4342	17.8304	17.8902	17.9408	18.3844	18.1133	17.7077	17.8971	18.2865	18.0458	17.6026	17.8912	17.5872	17.5343	17.8725	17.4906	17.6854	17.8644	17.914	18.0454	17.6058	17.8991	17.8178	17.7985	18.004	17.552	17.9943	17.9829	17.2925	18.2652	17.9929	17.9146	18.196	17.3922	17.8463	17.538	17.8891	18.4794	17.5283	1.22272	0.00933722	1.02963	0.638396
P62081	40S ribosomal protein S7	RPS7	22.127	194	20.8174	20.6721	20.6856	21.002	20.5825	20.7306	20.7115	20.6539	20.5839	20.5985	20.3776	20.6579	20.2067	19.8764	20.5762	20.8983	20.2269	20.531	20.2312	20.5607	20.7017	20.5762	20.5015	20.2148	20.1412	20.8399	19.946	20.3228	20.3592	20.251	20.6121	20.3095	20.3776	20.6121	19.8074	20.2897	20.3897	20.0458	20.5243	19.9615	1.22223	0.0097739	1.16462	0.0130542
Q8IYB3	Serine/arginine repetitive matrix protein 1	SRRM1	102.33	904	16.735	17.0006	16.68	16.592	16.7748	17.0234	17.0423	17.2151	16.9019	16.5844	16.6623	16.7262	16.3722	16.2205	16.7898	16.4254	16.4537	16.711	16.61	16.7009	16.9941	16.7446	16.5954	16.8336	16.6168	17.1249	16.126	16.5499	16.5959	16.361	16.9713	16.8064	16.7234	17.0889	16.3527	16.7043	16.6015	16.6218	16.9737	16.2109	1.22073	0.00491773	1.02188	0.708042
P61758	Prefoldin subunit 3	VBP1	22.626	197	16.4958	16.7578	16.1734	16.2264	16.6305	16.5827	16.3271	16.2219	16.4163	16.1838	15.994	16.3731	16.0946	15.9564	16.198	16.2659	16.0452	16.2593	15.9983	15.9594	16.0899	16.1054	16.2107	15.8022	15.7583	16.1517	15.8548	16.1432	16.1329	15.842	16.0786	16.0344	15.7355	16.1121	15.5702	16.075	16.2317	15.7693	15.898	15.633	1.22022	0.00229383	1.2282	0.000101036
P22307	Non-specific lipid-transfer protein	SCP2	58.993	547	18.242	18.2885	18.2169	17.9851	18.492	18.6793	18.2655	18.6642	18.1599	17.9891	17.9881	18.0602	18.1201	17.8368	18.0386	18.1542	17.9261	18.3578	17.7755	17.9234	18.201	18.3474	18.3182	18.1805	17.9296	18.0008	17.8862	18.2316	18.3239	18.0734	18.4256	18.1301	18.0084	18.373	17.5968	18.1944	18.1601	18.2337	18.4883	17.8357	1.21434	0.00807499	1.00781	0.881277
Q9NP77	RNA polymerase II subunit A C-terminal domain phosphatase SSU72	SSU72	22.574	194	17.6676	17.2264	17.258	17.586	17.3325	17.8054	17.6476	17.4683	17.3122	17.5339	17.3116	16.9092	17.4139	16.9124	16.9889	17.4994	17.1556	17.511	17.0916	17.2427	17.3316	17.071	17.2099	17.0063	16.8628	17.5613	16.9036	17.4589	17.4206	16.5147	17.3564	17.1483	17.8114	17.2884	18.0996	17.1524	17.278	16.9624	17.2956	16.4144	1.21434	0.00879886	1.09911	0.197676
P26639	Threonine--tRNA ligase, cytoplasmic	TARS	83.434	723	20.4286	20.8379	20.3777	20.7856	20.5694	20.3118	20.2694	20.7888	20.5697	20.8096	20.3227	20.5143	20.2102	20.6319	20.3777	20.1667	19.9737	20.3703	20.2165	20.1927	20.3005	20.188	20.2452	20.2263	20.2521	20.5558	20.0525	20.0818	20.0583	20.095	20.188	20.2621	20.1355	20.3067	19.5027	20.2769	20.1954	19.7898	20.4343	20.0256	1.21182	0.00727771	1.2122	0.000583764
P60842	Eukaryotic initiation factor 4A-I	EIF4A1	46.153	406	19.5645	19.6163	18.9327	19.5638	19.183	19.3821	19.3554	19.3277	19.5117	19.3151	18.9586	19.1533	19.0443	19.226	19.283	19.245	18.9899	19.2887	18.8622	19.03	19.1533	18.9655	18.9586	19.1012	18.9731	19.1885	18.8289	18.8717	19.0409	18.7793	19.1864	19.1575	18.9574	19.2417	18.6848	18.9568	19.132	19.0115	19.2289	18.963	1.20343	0.00403667	1.16686	0.00075436
O15371	Eukaryotic translation initiation factor 3 subunit D	EIF3D	63.972	548	19.9889	19.9202	19.6051	19.9273	19.6077	20.0092	19.7236	19.8236	19.6123	19.8207	19.5181	19.5373	19.6525	19.23	19.5043	19.8053	19.4239	19.5839	19.4977	19.6268	19.7125	19.8189	19.5327	19.8053	19.6543	19.7746	19.516	19.7652	19.7964	19.4252	19.8266	19.5348	19.6214	19.772	19.3334	19.7572	19.5601	19.7371	19.8752	19.2872	1.20238	0.00121158	1.01088	0.794298
O75934	Pre-mRNA-splicing factor SPF27	BCAS2	26.131	225	16.48	16.4556	16.48	16.3696	16.2364	16.5232	16.4285	16.431	16.0704	16.0492	15.8477	16.2098	16.273	16.363	16.0097	16.3515	16.0146	16.0626	15.8064	16.1063	15.9929	15.9986	16.3212	15.8689	15.7351	15.9564	15.8535	15.9173	15.9837	15.8458	16.058	15.9564	16.0835	15.961	15.5878	15.9384	16.1073	16.2959	15.9104	16.3119	1.1875	0.00751873	1.18446	0.000473529
P13639	Elongation factor 2	EEF2	95.337	858	21.4239	21.2828	21.2153	21.1965	21.3049	21.1379	21.2233	21.0931	21.1975	21.1799	20.9012	21.062	21.062	20.5963	21.1908	21.1727	20.7647	21.0614	20.7829	21.2591	21.1751	21.0969	21.2023	20.9407	20.719	21.7124	20.5251	21.1276	20.9663	20.7804	21.2695	20.9827	20.9609	21.1072	20.3502	20.9226	21.1727	20.6983	21.2726	20.5067	1.18115	0.00458518	1.09501	0.127665
Q14677	Clathrin interactor 1	CLINT1	68.259	625	17.5579	17.6734	17.709	17.2541	17.3494	17.6357	17.6324	17.7723	17.7204	17.7144	17.4446	17.4357	17.2424	17.0041	17.4547	17.4959	17.2478	17.4508	17.4913	17.5027	17.6425	17.7866	17.7866	17.8353	17.5469	17.6088	17.0916	17.6024	17.5846	17.081	17.9522	17.6184	17.4293	17.7303	16.9089	17.7538	17.4499	17.2864	18.0541	17.0177	1.16868	0.00728147	0.966669	0.563045
P46782	40S ribosomal protein S5	RPS5	22.876	204	19.0316	18.9785	18.6605	19.108	19.0638	18.8916	19.0846	18.9036	19.0416	18.9192	18.6716	18.9288	18.5767	18.5901	18.9288	18.9696	18.6249	18.8536	18.563	18.7718	18.9349	19.3084	18.6321	18.7158	18.705	18.7737	18.5218	18.7129	18.7589	18.3629	18.9444	18.6482	18.5742	18.821	18.5297	18.7829	18.5973	18.6757	18.948	18.5567	1.16509	0.00373323	1.09647	0.0367495
Q9UBQ5	Eukaryotic translation initiation factor 3 subunit K	EIF3K	25.059	218	18.2937	18.0949	18.2894	17.9235	18.0052	18.3483	18.2938	18.1988	17.8295	18.0553	17.852	17.8907	17.9675	17.7938	17.8907	17.9138	17.7771	18.1868	17.9399	18.046	17.8053	18.482	18.3698	18.0382	17.9796	17.9206	17.9495	18.0781	18.0563	17.7959	17.8495	17.7305	17.8611	18.1374	17.6082	17.9583	17.7542	18.6595	18.1978	17.7857	1.15463	0.00702717	1.02006	0.693032
P23396	40S ribosomal protein S3	RPS3	26.688	243	19.9846	20.0208	19.8276	20.1695	19.9606	19.7643	19.9484	20.0415	19.9354	19.861	19.8749	19.9915	19.5343	19.5125	19.7046	19.8009	19.6744	19.7766	19.7643	19.9386	20.1449	19.8448	19.8062	19.7543	19.6302	20.1584	19.4513	19.7304	19.7627	19.6075	20.0509	19.6297	19.5997	19.9948	19.3083	19.7121	20.0249	19.5062	19.8083	19.6075	1.144	0.00564818	1.07003	0.132469
O95163	Elongator complex protein 1	IKBKAP	150.25	1332	18.2471	18.1612	18.0052	18.2181	18.1806	18.0571	18.1213	18.2067	17.8565	18.165	17.8403	18.1819	17.8337	17.7895	17.8473	18.0187	18.0595	18.0134	18.0292	17.9989	18.0038	18.0913	17.9174	17.7713	17.8512	17.939	17.7873	17.9442	17.8719	18.1695	17.9068	18.1012	18.0901	17.857	18.0024	17.7276	17.9846	18.7194	17.7883	18.2423	1.11779	0.00898808	1.03758	0.373406
Q5VT25	Serine/threonine-protein kinase MRCK alpha	CDC42BPA	197.3	1732	14.2983	14.3336	14.2593	14.4854	14.4605	14.1561	14.4983	14.3829	14.5102	13.98	14.5889	14.5655	14.6994	14.4657	14.6191	14.3869	14.6212	14.3352	14.5398	14.6298	14.2224	14.2069	14.4258	14.333	14.6212	14.286	14.4737	14.2351	13.9654	14.3829	14.7876	14.8792	14.678	14.1526	14.1507	14.5271	14.6432	14.1921	14.0103	14.7726	0.865318	0.00497528	1.03063	0.546817
P54725	UV excision repair protein RAD23 homolog A	RAD23A	39.609	363	17.309	17.494	17.3333	17.121	16.8825	17.2998	17.0967	17.3801	17.2866	17.4194	17.472	17.6507	17.3384	17.4408	17.6618	17.4371	17.3857	17.3976	17.5936	17.5845	17.0934	17.4746	17.4709	17.6125	17.5744	17.4725	17.5976	17.5619	17.5788	18.0325	17.1263	17.6028	17.2619	17.2579	17.6528	17.6557	17.2975	17.9286	17.528	17.766	0.850276	0.00289938	0.902434	0.0364548
Q9Y485	DmX-like protein 1	DMXL1	337.83	3027	15.2935	15.39	15.5877	15.4502	15.5249	15.4618	15.7703	15.8221	15.4313	15.4754	16.0707	15.6757	15.6122	15.8296	15.9465	15.6633	15.5379	15.5662	15.8677	15.7893	16.0067	15.8345	15.6546	15.8292	15.7985	15.8222	15.3517	15.6854	15.7641	16.1263	15.8873	15.7773	15.9492	15.8248	15.4729	15.8315	15.8376	15.9908	15.8099	15.3861	0.849577	0.00619483	0.905182	0.0290482
O14657	Torsin-1B	TOR1B	37.978	336	16.3344	16.3265	16.7232	16.4171	16.8055	16.619	16.6681	16.629	16.4977	16.3851	16.7641	16.7468	16.652	17.0019	16.8492	16.5053	16.7552	16.8421	16.9635	16.6811	16.4154	16.4165	16.8378	16.4987	16.5165	16.369	16.5414	16.4936	16.481	17.1397	16.4918	16.6964	16.5326	16.4947	16.8973	16.5838	16.8387	16.2745	16.5233	17.001	0.849355	0.00397546	1.0397	0.407094
O43491	Band 4.1-like protein 2	EPB41L2	112.59	1005	18.4693	18.7562	19.013	18.7022	18.7199	18.9363	18.8627	18.733	18.7248	18.8956	19.0168	18.9885	19.5018	18.8648	18.9754	19.0112	19.1311	18.7951	18.9976	18.9383	18.9312	18.9885	19.0283	18.9252	18.9083	18.709	18.8251	18.839	19.3638	19.4051	18.7969	19.1665	19.1857	18.9808	18.8141	19.0889	18.9233	19.1966	18.5322	18.7689	0.846302	0.00608067	0.954494	0.32578
Q8NF91	Nesprin-1	SYNE1	1011.1	8797	18.21	18.17	18.7537	18.2449	18.3901	18.2034	18.4745	18.3735	18.4865	18.283	18.6228	18.5911	18.6527	18.9319	18.7432	18.26	18.692	18.2889	18.6752	18.5767	18.5718	18.7934	18.8467	18.7896	18.765	18.854	18.8642	18.5873	18.6667	18.8766	18.6006	18.6581	18.7809	18.5303	18.9626	18.5466	18.8256	18.7243	18.4832	18.8096	0.844112	0.00996001	0.843437	0.00015715
O95297	Myelin protein zero-like protein 1	MPZL1	29.082	269	15.0649	15.2915	15.0391	15.0763	15.1771	15.0285	15.0518	15.2826	14.9461	15.0535	15.7613	15.4821	15.0522	15.2245	15.489	15.1159	15.1171	15.4563	15.5165	15.2512	15.699	15.3308	15.0604	15.3576	15.3576	15.7205	14.7251	14.8805	15.0382	14.9109	15.6582	15.4427	15.2303	15.5377	14.8147	15.2493	15.854	15.4269	15.1697	14.8309	0.843541	0.00688769	0.972072	0.647928
P78559	Microtubule-associated protein 1A	MAP1A	305.48	2803	17.5262	16.9842	17.398	17.5784	17.5017	17.4953	17.8655	17.3096	17.527	17.2655	17.6501	17.8912	17.605	17.5194	17.7441	17.6783	17.8867	17.6033	17.7561	17.5864	17.4097	17.3257	17.273	17.3918	17.5764	17.393	17.8809	17.4576	17.6205	17.8509	17.5685	17.6303	17.8963	17.2821	17.7543	17.8268	17.5877	17.3849	17.0491	17.4822	0.8427	0.00817921	1.02563	0.611505
Q5VWC8	Very-long-chain (3R)-3-hydroxyacyl-CoA dehydratase 4	HACD4	27.52	232	14.6663	14.5202	14.9849	14.6113	14.4921	14.4773	14.8721	15.1091	14.7672	14.5934	15.1773	14.7267	15.079	14.9771	14.9414	14.7911	14.9405	15.0485	14.7627	15.1256	15.0152	14.6761	15.0673	14.9931	14.9187	15.0064	14.5505	14.937	14.7433	15.208	15.3731	15.0644	15.1954	15.0887	14.7489	15.1882	15.4367	14.949	14.9959	14.666	0.842302	0.00913044	0.896333	0.0347686
Q14254	Flotillin-2	FLOT2	47.064	428	17.84	17.9712	18.5102	18.0057	17.9617	18.1268	18.0862	18.2151	17.8357	18.1304	18.4616	18.1175	18.496	17.9515	18.4867	18.4808	18.4651	18.294	18.275	18.1778	18.3924	18.3848	18.6903	18.4856	18.4467	18.3006	18.6864	18.7512	18.4883	18.6471	18.3996	18.6276	18.5775	18.5392	18.2515	18.2621	18.5759	18.5501	18.2066	18.5632	0.839555	0.00952608	0.814005	2.70958e-05
P04275	von Willebrand factor	VWF	309.26	2813	19.5555	19.2648	20.0472	19.743	19.8008	19.6173	19.409	19.4975	19.68	19.5377	20.0571	19.7566	20.0627	20.0918	19.7597	19.8877	19.8845	19.58	19.9412	19.7585	20.0784	20.4635	19.9875	20.7768	20.1455	19.7146	20.0655	19.9976	20.5239	20.282	19.9407	20.1029	20.4195	20.0918	20.1847	19.5712	20.1008	20.1191	20.0457	20.2483	0.833526	0.00726127	0.759767	1.40034e-05
Q14558	Phosphoribosyl pyrophosphate synthase-associated protein 1	PRPSAP1	39.393	356	16.8795	17.027	17.027	16.8226	16.6868	17.0596	16.999	16.8428	16.6262	17.252	17.201	17.3635	16.8653	17.0769	17.5337	17.2055	16.9896	17.0217	17.4481	17.217	17.0796	16.838	17.137	17.2226	17.2977	17.0782	17.2291	17.3209	17.333	17.3412	17.1424	16.9441	17.0137	17.418	16.7723	17.1628	17.0691	17.6276	17.2272	16.9927	0.829339	0.0073567	0.929726	0.141399
Q16512	Serine/threonine-protein kinase N1	PKN1	103.93	942	16.3224	16.5116	16.6549	16.5083	16.5654	16.3258	16.8224	16.6938	16.8529	16.4087	16.6669	17.1387	16.9623	17.2349	16.6484	16.5468	17.0229	16.6328	16.6733	16.9288	16.67	16.4928	16.4985	16.5315	16.7976	17.1844	16.3545	16.6427	16.3963	16.7627	16.6756	16.779	17.1298	16.524	16.6353	17.0194	17.0096	17.0881	16.2516	16.6182	0.824189	0.0099868	1.00209	0.971036
Q04446	1,4-alpha-glucan-branching enzyme	GBE1	80.473	702	18.3822	18.3509	18.6647	18.4016	18.5797	18.2806	18.6284	18.4545	18.5603	18.7572	18.7129	18.6451	18.5884	19.2986	18.7413	18.7614	19.1903	18.5603	18.7851	18.5847	18.8942	18.6152	18.7675	18.6671	18.6658	18.731	19.2992	18.572	18.591	18.8018	18.8136	18.7259	18.9319	18.6868	19.1429	18.5513	18.796	18.5999	18.867	19.0182	0.823137	0.00805574	0.907194	0.0558128
Q9BQS8	FYVE and coiled-coil domain-containing protein 1	FYCO1	166.98	1478	16.8817	16.8353	17.134	16.9913	16.6985	16.7128	16.5985	16.7141	17.03	17.2402	17.0304	16.9527	17.0987	17.1796	17.2829	17.1535	17.6273	17.0082	17.2712	17.072	16.8507	16.8933	17.1466	17.0946	17.2835	16.8441	17.5592	17.1072	17.2258	17.2716	17.1322	17.2599	16.7149	16.9717	17.6757	17.1279	17.1212	17.1524	17.0246	17.5095	0.821307	0.00572421	0.918474	0.119739
P51570	Galactokinase	GALK1	42.272	392	17.1586	17.3844	17.1681	17.1297	17.1972	17.1469	17.1712	17.069	17.2414	17.4426	17.5803	17.2282	17.4682	17.7525	17.3524	17.578	17.2838	18.0641	17.3369	17.3748	17.6838	17.2569	17.0517	17.2693	17.3322	17.6189	17.9908	17.2039	17.2853	17.2403	17.6069	17.4189	17.4189	17.4825	17.2126	17.2192	17.3125	17.1277	17.4457	17.8695	0.817325	0.00402436	0.968645	0.555259
Q01831	DNA repair protein complementing XP-C cells	XPC	105.95	940	16.5343	16.5645	16.904	16.3463	16.4583	16.3789	16.8206	16.5609	16.6588	16.8327	16.8464	16.7674	17.0988	17.3272	16.9113	16.7492	16.7778	16.5421	17.0165	16.9675	17.4102	16.8844	16.8343	17.3512	17.2549	17.1757	17.0346	17.2724	17.4021	16.8639	17.2256	16.9795	16.838	17.3006	16.4667	17.4688	17.0475	16.9276	17.4527	16.8294	0.815364	0.00503325	0.785763	0.00015016
Q4J6C6	Prolyl endopeptidase-like	PREPL	83.926	727	16.24	16.73	16.7514	16.5236	16.4389	16.576	16.5313	16.8694	16.7862	16.67	16.9193	16.9363	16.7441	16.7071	16.7548	17.0413	17.3716	16.8416	16.9873	16.8278	16.9249	16.6659	16.8626	16.6433	16.7647	16.6824	17.2227	16.9677	16.982	16.6765	16.7308	16.6764	16.3959	16.9131	17.2063	16.8424	16.8088	16.5236	16.7161	16.9813	0.811445	0.00242468	0.967964	0.513011
Q5TEJ8	Protein THEMIS2	THEMIS2	72.048	643	16.89	16.796	16.9206	16.7566	16.8455	16.6721	16.7566	16.8854	16.7879	16.7951	17.1738	16.9118	17.1987	17.1044	17.0827	16.6267	17.1337	16.976	17.0852	17.8483	17.1924	17.0449	16.8243	17.1225	17.1704	17.8385	16.876	17.4249	17.1306	17.3468	17.0079	17.242	17.9497	16.9513	16.6186	17.2309	17.6086	17.2529	16.836	16.9836	0.810252	0.00713466	0.858378	0.0266484
P15309	Prostatic acid phosphatase	ACPP	44.566	386	14.2529	14.1688	14.5719	14.3121	14.4372	14.2655	14.2216	14.3475	14.341	14.6167	14.2504	14.6315	14.8881	15.0215	14.5558	14.8044	14.3605	14.3951	14.8479	14.8335	14.7478	15.0578	14.8607	14.8199	14.6031	15.4464	14.3475	14.962	14.8305	15.7055	14.6245	14.9279	14.4421	14.8384	14.3208	14.5144	15.1826	14.3216	15.0805	14.5675	0.809249	0.00463005	0.810076	0.0044922
Q12888	Tumor suppressor p53-binding protein 1	TP53BP1	213.57	1972	18.0378	17.8214	18.2277	18.159	18.2179	17.8882	18.3716	18.1899	18.0326	18.2711	18.1004	18.4929	18.0359	18.4945	18.6379	18.2201	18.7187	18.3197	18.3458	18.923	18.292	18.3552	18.1388	18.462	18.1144	18.0138	18.2357	18.4083	18.0241	18.6311	18.3718	18.4369	18.3613	18.3693	18.5821	18.0374	18.0856	18.6857	18.0691	18.1963	0.808222	0.00857009	0.987432	0.81424
P42229	Signal transducer and activator of transcription 5A	STAT5A	90.646	794	17.9734	18.0622	18.3438	18.2668	18.3189	17.8823	18.1139	18.0859	18.2889	18.4331	18.6266	18.2229	18.6146	18.5457	18.4926	18.2984	18.5347	18.2904	18.5684	18.7174	18.6879	18.4417	18.373	18.3466	18.4452	18.6634	18.6026	18.4024	18.2473	18.7251	18.5777	18.6282	18.8023	18.5576	18.1765	18.581	18.8933	18.5291	18.0995	18.4422	0.804258	0.0006963	0.884494	0.0144776
Q15811	Intersectin-1	ITSN1	195.42	1721	17.2289	17.0123	17.0243	17.5639	17.2943	17.1626	16.766	16.7091	16.8216	17.1204	17.1716	17.3599	17.3068	17.4944	17.2744	17.3609	17.2552	17.5397	17.3847	17.8819	17.4957	17.3941	17.2631	17.1332	17.0819	17.345	17.2356	18.0157	17.5018	17.8059	17.3696	17.3226	17.2336	17.2167	17.0293	16.9717	17.0374	17.8602	17.0103	17.1036	0.794099	0.00513754	0.942977	0.359409
Q96P48	Arf-GAP with Rho-GAP domain, ANK repeat and PH domain-containing protein 1	ARAP1	162.19	1450	16.945	16.8176	17.3927	17.3361	17.394	16.9944	17.0969	17.1011	17.2966	16.9667	17.2135	17.5807	17.6525	17.8916	17.5951	17.3461	17.4768	17.4705	17.0989	17.3593	17.1032	17.1952	17.4749	17.0658	17.0989	17.2326	17.3234	17.3828	17.2623	17.7374	17.2018	17.2588	17.3843	17.1265	17.0847	17.3788	17.7391	16.953	16.8569	17.6214	0.793119	0.0030162	1.01904	0.739044
Q9NTJ4	Alpha-mannosidase 2C1	MAN2C1	115.83	1040	17.233	17.0767	17.5605	17.6386	17.4049	16.8124	17.1903	17.0943	16.935	17.3788	17.5815	17.9392	17.4026	17.5619	17.7724	17.5194	17.6788	17.1882	17.7232	17.3164	17.0608	17.2024	17.7249	17.2771	17.4821	17.3257	17.2992	17.3312	17.7622	17.4781	17.3231	17.2876	17.2954	17.2173	17.2458	17.2564	17.3968	17.6115	17.0626	17.5088	0.792282	0.00679889	1.03022	0.586642
O15230	Laminin subunit alpha-5	LAMA5	399.73	3695	18.9738	18.8871	19.5964	19.3692	19.4773	19.1514	18.9803	19.2467	19.4816	19.5997	19.7951	19.4707	19.6645	19.4577	19.5882	19.5197	19.769	19.3387	20.0283	19.5159	19.7662	19.6087	19.7625	19.7412	19.7751	19.3347	19.723	19.768	19.7507	19.7754	19.3918	19.553	19.8532	19.5054	19.7662	19.429	19.915	19.6203	19.3715	19.678	0.790901	0.00512924	0.865208	0.0082635
Q9NZN3	EH domain-containing protein 3	EHD3	60.886	535	18.2671	17.8288	18.5065	18.4084	17.9234	18.3083	18.1378	18.0762	18.0806	18.0755	18.516	18.5394	18.5587	18.6963	18.3441	18.6221	18.8847	18.2844	18.2074	18.3755	18.798	18.6738	18.3964	18.6184	18.6405	18.5461	18.6564	18.7649	18.4619	18.6093	18.66	18.5971	18.7351	18.6646	18.2232	18.5026	18.8072	18.1821	18.6784	19.0084	0.789161	0.00175755	0.824073	0.000535407
O60504	Vinexin	SORBS3	75.34	671	18.4918	18.3715	18.605	18.409	18.8586	18.5625	19.1121	18.7423	18.7688	18.9864	19.1743	18.8742	19.4281	18.5617	18.9472	19.096	19.1207	18.8772	19.3997	18.9296	19.3958	19.3345	18.4909	19.448	19.2203	19.0163	18.9663	18.9916	19.3838	19.8353	19.2952	19.4399	19.4337	19.6846	19.123	19.161	19.2251	19.4579	19.1089	18.9723	0.784548	0.00636677	0.766628	0.00024248
Q14118	Dystroglycan	DAG1	97.44	895	17.3743	17.4082	17.6999	17.557	17.2008	17.365	17.4425	17.4912	17.4479	17.9385	18.1487	17.4633	17.8108	17.6999	17.5904	17.8816	18.4209	17.415	18.1385	17.8801	17.6753	17.6774	17.7605	18.2165	18.411	17.6168	18.6362	17.7531	18.053	17.9257	17.78	17.8677	17.6969	17.8806	18.8489	18.0223	17.6655	17.5148	17.7493	18.321	0.783281	0.00897738	0.820802	0.01166
Q13425	Beta-2-syntrophin	SNTB2	57.949	540	17.6715	17.6772	18.0256	17.8359	17.5918	17.9678	17.8645	17.6983	17.7222	18.2729	18.1687	18.0719	18.1407	18.7891	18.1942	18.0655	18.3297	17.7817	18.1048	18.2183	18.6342	18.1846	18.0335	18.3507	18.5287	17.9842	18.0642	17.9653	18.2607	18.4646	18.2851	18.2551	18.3468	18.1853	17.941	18.4081	18.1227	18.1366	17.8621	18.0874	0.78258	0.00319393	0.873315	0.0190435
P55268	Laminin subunit beta-2	LAMB2	195.98	1798	19.0007	18.8855	19.6006	19.3302	19.3979	19.1138	19.1156	19.2056	19.3473	19.7872	19.9271	19.3793	19.5614	19.5776	19.6404	19.5083	20.0043	19.2598	20.0089	19.4683	19.5398	19.8857	19.6979	19.9363	20.0272	19.2247	20.1479	19.6487	19.9296	19.8436	19.478	19.691	19.7384	19.6712	20.1998	19.4804	19.4947	20.0994	19.6513	19.9509	0.781823	0.00837862	0.80617	0.0016018
Q6ZNJ1	Neurobeachin-like protein 2	NBEAL2	302.51	2754	17.3552	17.3225	17.7941	17.4124	17.7328	17.5162	17.4358	17.5248	17.7757	17.516	17.9453	17.8105	17.5481	18.4283	18.0946	17.7464	17.7172	17.6204	18.1228	17.9332	17.9485	17.9059	17.9137	18.0723	17.9744	17.9719	17.8031	18.2979	18.28	18.3684	17.9701	17.9113	18.0122	18.1468	17.9465	17.8138	18.0031	18.2102	18.3143	18.2435	0.780172	0.00217174	0.791256	5.85623e-05
P33908	Mannosyl-oligosaccharide 1,2-alpha-mannosidase IA	MAN1A1	72.968	653	16.8078	16.6053	17.2757	16.6819	17.0496	16.9764	17.089	16.8288	16.8315	17.3992	17.8125	17.3822	17.2683	17.181	17.1328	16.7207	17.2207	17.2881	17.6538	17.4988	17.7501	17.0984	17.2606	17.34	17.4879	17.8439	17.085	17.2803	17.1872	17.9427	17.5035	17.4963	17.3224	17.508	17.1814	17.3833	17.4265	17.4134	17.1129	17.0328	0.778422	0.0094707	0.842281	0.0107742
P07225	Vitamin K-dependent protein S	PROS1	75.122	676	17.017	16.6996	17.356	17.0042	16.8398	16.9377	17.3027	16.8883	17.142	17.0964	17.2673	17.7077	17.2116	18.0894	17.5451	17.295	17.4317	17.2764	17.2756	16.8265	17.5688	17.2588	17.253	17.9144	17.8011	17.0926	17.4619	17.6888	17.5996	17.6196	17.201	17.3156	17.423	17.7348	17.3163	17.5109	17.2627	17.5978	17.4639	17.6931	0.776863	0.00887577	0.824505	0.00325424
Q14289	Protein-tyrosine kinase 2-beta	PTK2B	115.87	1009	16.113	16.1481	16.4185	16.4605	16.2164	16.0564	16.5122	16.2887	16.315	16.2553	17.0198	16.1997	16.3781	16.8609	16.5092	16.8784	16.3802	16.479	17.1547	16.7187	16.9012	16.3397	16.5118	16.8342	16.7592	16.8019	16.4951	16.5907	16.6309	16.6825	16.6529	16.6464	16.3481	16.6321	16.2052	16.7006	16.6926	16.3899	16.2935	16.7488	0.768726	0.0029477	0.917177	0.13442
P36871	Phosphoglucomutase-1	PGM1	61.448	562	18.6414	18.3502	18.5323	18.3852	18.4175	18.2925	18.4097	18.5977	18.3781	18.721	18.6665	18.6876	18.7326	19.0415	18.8776	18.9622	19.2937	18.7484	18.9881	18.5239	18.5575	18.2308	18.7364	18.4529	18.8199	18.7398	19.7176	18.6016	18.4531	18.6114	18.4543	18.476	18.556	18.3992	19.9356	18.6016	18.4128	19.0456	18.3406	19.502	0.768626	0.000268923	0.952746	0.565087
P36955	Pigment epithelium-derived factor	SERPINF1	46.312	418	18.4565	18.0935	19.0543	18.3882	18.213	18.3086	18.8071	18.5203	18.3532	18.874	19.2918	18.9822	19.02	18.5084	18.8074	18.6407	19.1719	18.5306	19.2817	18.7464	19.0381	18.7234	18.6685	18.9964	19.1752	18.922	19.1976	18.7742	18.8625	19.4069	18.812	19.2778	19.1272	18.8008	18.6376	18.9192	18.9874	19.2967	18.7244	19.1815	0.762466	0.00966848	0.827033	0.00623919
P35612	Beta-adducin	ADD2	80.853	726	12.3751	12.5156	12.2485	13.2463	12.5238	12.939	12.8066	12.6685	12.3342	12.5705	13.2417	12.5705	13.2684	12.6664	13.0083	13.5171	13.3039	13.0799	12.7876	12.8594	12.6821	13.0509	12.3638	12.7677	13.005	12.8178	13.2801	12.6277	12.5466	13.7357	12.2295	13.72	14.0145	12.8207	13.4479	12.7389	12.535	13.531	12.6781	13.7257	0.753921	0.00800105	0.876997	0.189587
Q9UBG3	Cornulin	CRNN	53.533	495	17.8107	17.2545	18.022	17.8117	18.3692	17.8028	17.3716	17.5124	18.1482	18.0768	18.2203	18.5336	18.0001	18.7008	18.2077	17.8227	18.1805	18.6136	17.9442	18.1625	21.2605	20.4111	18.3097	20.1492	18.0446	18.2235	18.4529	20.4301	20.5177	18.6586	19.3826	18.1976	18.3014	19.2902	18.4275	17.8475	18.0894	19.5948	21.909	18.0432	0.747109	0.00965595	0.451015	0.000260255
Q15119	[Pyruvate dehydrogenase (acetyl-transferring)] kinase isozyme 2, mitochondrial	PDK2	46.153	407	13.983	13.7383	13.9798	13.7846	13.6922	13.8027	13.9736	14.0369	13.8925	14.3323	14.8416	14.3504	14.387	14.135	14.5068	13.7962	14.4574	13.9925	14.7556	14.2009	14.8722	14.2817	13.8589	14.5859	14.4928	14.565	15.1478	14.471	14.4312	14.4017	14.4152	14.4114	14.6922	14.2237	14.2123	14.3251	15.0209	14.4414	14.0479	14.5377	0.74703	0.00224265	0.790125	0.00179743
O95865	N(G),N(G)-dimethylarginine dimethylaminohydrolase 2	DDAH2	29.644	285	16.2318	16.0824	16.4429	16.5143	16.1232	16.4625	16.2205	16.3839	16.3776	17.2075	17.0148	16.7027	16.9504	17.0085	16.8106	16.5027	16.7074	16.4033	17.2667	16.9726	16.6776	16.9382	16.5702	16.9968	17.0993	16.6619	16.8472	17.0296	17.2438	17.3534	16.5802	17.1108	17.1409	16.8079	17.1125	16.9739	17.1596	17.2552	16.6048	16.5388	0.742616	0.00396496	0.803405	0.00277778
Q7Z6L1	Tectonin beta-propeller repeat-containing protein 1	TECPR1	129.69	1165	12.7869	13.1271	13.586	13.3514	13.0574	13.388	13.2133	13.2962	13.6344	13.493	14.0284	13.586	13.6153	14.2107	13.9071	13.237	13.571	13.4327	14.0062	13.7053	14.2324	13.5346	13.6026	14.2659	14.1783	13.8445	14.441	14.1241	14.0522	13.7964	13.9566	13.9071	13.7817	14.3124	13.3742	14.0735	13.9391	14.3435	13.8413	14.6842	0.738881	0.00269403	0.705827	3.37188e-05
P54289	Voltage-dependent calcium channel subunit alpha-2/delta-1	CACNA2D1	124.57	1103	18.234	18.3866	18.7406	18.4676	18.4387	18.3209	18.8664	18.3864	18.5355	18.5921	18.9544	18.9925	19.0943	18.744	18.8543	18.9743	19.4502	18.5752	19.0528	18.7496	18.9536	18.7045	18.8953	19.2222	18.943	18.5793	19.5813	18.762	18.9136	19.0455	18.8045	18.8896	18.8377	18.8638	19.9846	18.7933	19.0584	19.1737	18.7777	19.6861	0.733416	0.000222438	0.810587	0.00667963
O15061	Synemin	SYNM	172.87	1565	17.3832	17.1345	17.7381	17.5186	17.5149	17.3044	17.431	17.4278	17.8715	18.0081	18.3235	17.6711	17.7272	18.1912	17.7693	17.4041	18.4776	17.8134	18.722	17.8241	17.6246	17.9212	17.9236	17.8525	19.463	17.788	19.1483	17.8959	17.7555	17.95	17.6115	18.2706	17.9236	17.6619	19.8017	18.007	17.7508	18.0448	17.2939	19.383	0.727418	0.00862308	0.762709	0.0382001
P12724	Eosinophil cationic protein	RNASE3	18.385	160	15.3103	15.2466	16.0081	15.6985	16.2507	15.6743	15.1618	15.2286	15.1297	15.2746	16.002	15.886	16.1482	16.6083	16.1398	15.5628	16.2791	15.5989	15.7807	15.6791	15.4285	15.4608	16.0081	15.5817	15.7648	15.5937	15.4849	15.6977	15.4031	15.8892	15.5865	15.5104	16.0597	15.5331	15.6773	15.6157	16.2914	16.2275	15.6502	15.8509	0.721882	0.00951354	1.01231	0.875446
P02549	Spectrin alpha chain, erythrocytic 1	SPTA1	280.01	2419	19.0011	18.6802	19.1771	19.1161	19.2854	19.2258	19.0009	19.0293	19.2956	19.305	19.8997	19.3252	19.6822	19.5988	19.6046	18.8315	20.236	19.2647	20.0472	19.4877	19.6885	19.5932	19.3252	19.8084	20.0217	19.9916	19.7334	20.0001	19.6433	21.0429	19.2311	20.6911	20.9468	19.6388	20.3242	19.2497	19.3116	21.3652	19.5702	20.5369	0.713951	0.00311701	0.645734	0.000548308
P05546	Heparin cofactor 2	SERPIND1	57.07	499	17.3779	17.2825	18.1736	17.6289	17.6355	17.6541	17.639	17.5151	17.5811	18.3781	18.4531	18.4656	18.169	18.4763	18.1249	17.4275	18.5948	17.7307	18.2374	18.0618	19.2276	18.5818	18.0461	19.0733	18.6937	18.4679	18.4851	18.7164	18.5408	18.9823	18.3692	18.744	18.4036	18.6153	17.9632	18.4204	18.8221	18.7271	18.2698	18.6892	0.713242	0.00619606	0.632181	1.92133e-06
P35573	Glycogen debranching enzyme	AGL	174.76	1532	19.2563	19.5727	19.8919	19.6872	19.7482	19.9488	19.3579	19.5393	19.7294	20.1362	20.1338	20.1026	19.8854	20.2883	20.1026	20.6971	20.6793	19.7249	20.3359	19.8055	19.8453	19.8207	20.1641	20.0005	19.8631	19.8289	20.8638	20.374	20.3205	20.2872	19.8519	20.0612	20.0515	19.9127	21.6253	19.8869	19.964	19.9357	19.8193	21.0465	0.712646	0.00199037	0.843815	0.084052
P11277	Spectrin beta chain, erythrocytic	SPTB	246.47	2137	19.4307	18.9907	19.5002	19.6637	19.7984	19.5417	19.2528	19.395	19.7109	19.6734	20.04	19.6771	19.9401	20.1347	20.0439	19.2893	21.1234	19.6535	20.1732	19.802	19.8502	19.9617	19.6182	19.9855	20.0486	20.1532	20.5921	20.068	19.774	20.9452	19.3419	20.7102	21.0643	19.82	21.02	19.4196	19.5919	21.3076	19.8688	21.1528	0.711048	0.00980456	0.720482	0.00868
Q8N3V7	Synaptopodin	SYNPO	99.462	929	13.9474	13.6112	13.7846	13.952	13.9411	13.7875	13.6876	14.1862	14.0935	14.0696	15.1819	14.4061	14.2215	13.9889	14.2582	14.1416	14.5642	14.5851	14.7438	14.0106	13.9474	14.0658	13.81	14.2018	14.3921	14.1446	15.1589	14.0754	14.0777	14.587	13.7365	14.1565	14.1062	13.5407	15.4127	13.9483	13.9558	14.5697	13.6228	14.7482	0.705087	0.00115681	0.962745	0.692975
P34913	Bifunctional epoxide hydrolase 2	EPHX2	62.615	555	15.7653	15.8245	16.4623	15.9421	16.1325	15.8873	15.4822	15.5997	15.8304	16.2115	16.6539	16.3957	16.2121	16.3805	16.4893	16.634	16.8391	15.6574	16.695	16.3034	17.1326	16.743	16.5089	16.9842	16.6564	16.1612	15.7814	16.2115	16.2021	15.9904	16.6073	16.1996	16.248	17.0786	16.4591	16.6564	16.4755	16.3316	16.8996	15.8983	0.701112	0.00176769	0.817122	0.0247024
Q9NPC4	Lactosylceramide 4-alpha-galactosyltransferase	A4GALT	40.499	353	14.7432	14.7235	15.6007	14.9555	15.0732	14.8039	15.1496	15.1027	15.2043	15.024	16.6259	15.6968	15.3935	15.881	15.4071	15.3034	15.1656	15.0806	15.9732	15.0016	15.1439	15.278	15.6794	15.5053	15.4553	15.5372	16.4445	15.1359	14.9309	15.0833	15.2739	15.3967	15.172	15.1077	15.359	15.1079	15.7149	16.3307	15.1786	16.6907	0.699894	0.00971523	0.882195	0.238228
Q86WV6	Stimulator of interferon genes protein	TMEM173	42.192	379	13.7137	13.3324	14.4279	13.1053	13.6202	13.2564	13.7603	13.8279	13.2123	14.0209	14.2911	13.9214	14.178	14.5037	13.8024	13.5923	14.1002	14.7645	14.1502	14.2141	13.8687	13.8423	14.7247	13.932	14.4798	14.414	14.2235	14.7368	14.4003	15.2503	14.281	14.2764	14.3299	14.2465	13.9365	14.929	15.1094	13.929	14.2511	14.2002	0.695408	0.00595801	0.717817	0.00114893
Q6UWY5	Olfactomedin-like protein 1	OLFML1	45.95	402	16.7009	16.6842	17.0689	16.9602	16.8169	16.8649	17.0143	16.7314	16.7263	17.3281	18.2608	17.0728	17.3497	17.5928	17.1285	17.0819	17.1719	17.0652	18.1126	17.3221	17.1986	17.3698	17.066	18.1166	17.6088	16.7898	17.5185	17.6087	17.9024	17.9099	17.0801	17.3307	17.1506	17.7471	18.029	17.5468	17.0819	17.6399	17.9542	17.8387	0.694363	0.0029864	0.77288	0.00605726
Q9NRN5	Olfactomedin-like protein 3	OLFML3	46.01	406	17.2772	16.7617	17.1933	17.2957	16.8029	16.8036	17.1052	17.0824	16.8309	17.2055	18.2598	17.2772	17.6379	17.8118	17.238	17.2108	17.5806	16.996	18.1918	17.4524	17.4499	17.4154	17.0963	17.816	17.455	16.9182	17.5377	17.5711	17.5639	17.8185	17.0376	17.5491	17.815	17.2142	17.0473	17.3085	17.0801	17.8061	17.6177	17.8656	0.692658	0.0022926	0.902233	0.209554
P07358	Complement component C8 beta chain	C8B	66.947	591	18.1483	17.6558	18.4842	18.402	17.8633	17.7252	18.1375	17.9778	18.0412	18.4562	19.1212	18.669	18.5843	19.1118	18.3802	17.8837	18.7973	18.4006	19.136	18.2255	19.1774	18.524	17.923	18.9023	18.5857	18.4297	18.9827	18.706	18.7187	18.9867	18.6131	18.5664	18.2376	18.6884	17.9526	18.7725	18.6044	18.9757	18.6029	18.6519	0.686903	0.00369358	0.829309	0.0350682
P02649	Apolipoprotein E	APOE	36.154	317	17.5875	17.6186	18.3512	17.8077	17.799	17.592	17.3558	18.0674	17.6816	18.1263	18.9222	18.0996	18.6289	18.6157	18.0996	17.8323	18.0362	18.2568	18.9469	17.9685	17.9267	17.9415	17.9061	18.0742	18.1631	18.0242	17.853	18.2059	18.2184	19.081	17.7055	18.1491	18.9382	17.7276	17.8449	18.3234	18.0339	19.1841	17.691	18.1356	0.686849	0.0032197	0.941688	0.535767
P0C0L4	Complement C4-A	C4A	192.78	1744	16.5964	16.3698	17.0558	16.965	16.7032	16.6752	16.5042	16.8129	16.5214	17.0217	17.3277	17.4488	17.2379	18.4201	17.3546	16.5044	17.2554	16.8124	17.6351	16.9897	17.8838	17.0018	16.7531	18.373	17.7911	16.9418	17.1435	17.9092	17.5055	17.5132	17.1522	17.3701	16.9245	17.3564	17.0972	16.8139	17.3483	17.4552	17.3011	17.4637	0.670796	0.00465457	0.78767	0.0204436
Q96IY4	Carboxypeptidase B2	CPB2	48.424	423	15.8424	15.6777	16.2888	15.9799	15.7067	15.7636	16.1912	15.8506	16.1205	16.5107	16.6493	16.9615	16.2983	17.5439	16.9061	15.597	16.3925	16.4998	16.8082	16.0522	16.3829	16.2495	16.0952	16.9748	16.6522	16.3237	16.2395	16.403	16.657	16.4511	16.1766	16.0961	16.174	16.4252	16.2676	16.3839	16.4724	16.6045	16.4468	16.7615	0.670052	0.00734587	0.913943	0.306407
P12110	Collagen alpha-2(VI) chain	COL6A2	108.58	1019	20.0076	19.6204	20.627	20.307	20.0871	19.8797	20.0894	20.1999	19.9425	21.0394	21.2716	20.6735	20.8302	20.5612	20.3652	20.4516	20.8592	20.1192	21.5482	21.1388	20.5383	20.6569	20.8723	20.5459	20.5404	20.4275	20.9102	20.6147	20.948	21.2819	20.2221	20.7012	21.1054	20.4166	20.3652	20.3593	20.6081	21.6357	20.2558	20.1316	0.65889	0.00508574	0.885203	0.224658
O96006	Zinc finger BED domain-containing protein 1	ZBED1	78.155	694	14.6158	15.0182	15.685	14.8699	14.8605	14.7145	15.5315	15.3484	14.5943	15.5826	16.0353	15.8154	15.8984	15.4054	16.2807	14.8967	15.5022	15.8131	16.3069	15.5001	15.7058	16.1051	15.4908	16.1675	16.7367	15.4502	16.0819	16.0828	15.3686	16.6054	15.1972	17.0475	15.4425	15.3465	15.9657	15.653	16.4548	16.1479	15.2453	15.2773	0.631415	0.00260887	0.724527	0.00974443
P00915	Carbonic anhydrase 1	CA1	28.87	261	19.4826	19.0526	19.5687	19.6205	19.883	20.1662	19.4236	19.7104	19.3799	20.0681	20.7548	19.8674	20.4979	20.6464	20.3562	19.2517	20.6196	19.7953	20.8261	20.3923	20.2925	20.1313	19.6042	20.1738	20.4424	20.5946	19.8686	20.6327	20.4867	21.7327	20.0717	21.0328	21.6157	20.6117	20.4676	19.724	19.9269	22.4968	20.1254	20.8973	0.630593	0.00274422	0.669745	0.00671814
P49747	Cartilage oligomeric matrix protein	COMP	82.86	757	14.5788	14.5701	14.9672	15.2149	14.8352	14.8456	14.7611	15.148	14.7666	15.3388	15.6401	15.4387	16.1289	15.6352	15.6254	14.9495	16.0355	15.2137	15.8419	15.3109	14.8512	15.1488	15.0488	15.4121	15.1268	14.8568	16.1196	14.8417	15.0369	15.5381	14.7826	15.4405	15.4004	14.7826	14.8279	15.1313	14.8978	15.8993	15.3241	15.8439	0.624449	0.000152502	1.01871	0.846555
Q9BXN1	Asporin	ASPN	43.417	380	18.347	18.6673	18.6977	18.6541	18.4766	18.4124	18.4865	18.4978	18.9112	18.9557	20.0447	18.8297	20.4792	19.073	18.7805	18.6662	19.1428	18.6558	19.7761	19.5396	19.3729	19.1088	18.6877	19.3631	20.2949	19.4186	19.0419	19.2831	19.2553	20.4533	19.0557	19.4352	19.5391	19.0604	19.0228	20.069	19.4748	19.3165	18.7526	19.4499	0.620673	0.00427303	0.748418	0.0152664
P09936	Ubiquitin carboxyl-terminal hydrolase isozyme L1	UCHL1	24.824	223	17.7157	16.2057	17.0989	16.5825	16.5082	16.3807	16.6601	16.3421	16.6004	17.034	17.0489	18.1561	17.7286	16.9587	17.8749	18.1891	17.8666	16.4437	17.5117	17.4184	16.9548	16.9968	17.0733	17.2729	17.5271	17.1507	17.3817	17.0092	17.5084	17.1977	16.751	17.2089	17.289	16.8641	17.5223	17.3593	17.4878	17.2598	16.8108	17.7772	0.571632	0.00235811	0.930518	0.511782
P02654	Apolipoprotein C-I	APOC1	9.3318	83	16.2357	16.0829	17.3284	16.5182	16.9469	16.8252	16.7106	16.8026	16.9433	17.2154	18.0084	17.8717	17.2179	18.178	18.5715	16.4002	17.4699	17.2767	18.0039	16.9453	18.2186	17.5873	17.0745	18.3099	18.153	17.9646	17.6352	17.9324	17.8072	18.4481	17.4503	17.5586	17.9875	17.3066	17.2804	17.2997	17.6504	18.3473	17.3082	18.128	0.561194	0.00278229	0.662153	0.001814
P27658	Collagen alpha-1(VIII) chain	COL8A1	73.363	744	16.3968	16.2794	16.6822	16.0991	17.0153	16.1225	17.0973	17.0745	16.6825	16.3587	18.4055	16.9632	18.2889	16.3883	17.4094	16.9381	16.9151	17.275	18.5275	17.2784	16.181	16.0743	16.7795	16.5736	16.6827	16.4905	16.1806	16.6012	16.8362	17.1963	16.3187	16.1972	16.8099	16.2895	15.9226	16.0177	16.6922	16.6485	16.0141	16.3826	0.55167	0.00398336	1.47983	0.00286861
P04004	Vitronectin	VTN	54.305	478	17.6021	17.4754	18.5858	17.5618	17.6318	17.55	18.4549	17.9515	17.7627	18.7579	20.106	19.3356	18.7367	20.1151	19.2839	17.3906	18.5123	18.35	20.1011	18.3909	18.3728	18.0678	18.589	19.3401	19.0447	18.6252	18.5199	18.7977	18.868	19.3417	18.0626	18.7161	17.8658	18.4953	17.9366	18.9893	18.6194	18.8915	18.6916	18.3758	0.466892	0.00352658	0.915262	0.571438
P62753	40S ribosomal protein S6	RPS6	28.68	249	18.2487	17.7995	17.7055	18.0085	17.7685	17.747	17.5113	17.5113	17.4193	17.2765	17.0625	17.3368	17.4945	17.3658	16.9813	17.8055	17.173	17.514	16.916	17.6256	17.0231	17.2797	17.6156	17.1722	17.0854	17.514	17.4764	17.6714	17.2594	17.131	17.1955	17.0214	17.3578	17.3368	17.1219	17.2872	17.0551	16.8305	17.4832	17.4085	1.29426	0.0100647	1.18694	0.0094922
Q9Y2E5	Epididymis-specific alpha-mannosidase	MAN2B2	113.98	1009	15.6913	15.767	16.469	15.4891	15.458	15.5695	15.5534	15.5437	15.4415	16.3501	16.4979	15.7808	15.8265	16.9076	16.118	16.1743	15.6794	16.2677	16.5324	16.4182	15.6538	15.9764	16.675	15.8604	16.4486	16.2474	16.1823	16.7096	16.8654	16.1149	16.2325	15.7547	15.9047	15.9245	15.0906	16.4365	15.8955	16.3091	15.7458	15.7293	0.713491	0.0100652	0.925905	0.423533
P98082	Disabled homolog 2	DAB2	82.447	770	18.309	17.9734	18.1664	18.0369	17.9828	17.7062	18.4759	18.4078	18.3521	17.9795	18.4157	18.3761	18.6151	18.8513	18.2525	18.2756	18.9116	18.1663	18.3771	18.3385	18.5221	18.8419	18.1163	18.1574	18.161	18.7004	18.6405	18.2213	18.1652	18.8202	18.5624	19.0149	19.0555	18.081	18.0819	18.4844	18.9405	18.5238	18.0403	18.6856	0.801624	0.0101563	0.875193	0.0631333
P61513	60S ribosomal protein L37a	RPL37A	10.275	92	17.194	17.2932	16.6762	17.0828	16.461	17.212	17.1421	16.8236	16.3917	16.6465	16.6939	16.21	16.7859	15.9761	16.0354	17.0945	16.0582	16.9315	15.7341	16.2196	16.1085	16.6473	16.5718	16.7249	16.5596	16.2907	16.6684	16.3861	16.5333	16.4516	16.4801	16.218	16.5171	17.0586	17.2713	16.9208	16.1911	15.8234	17.2705	17.1044	1.43237	0.0101765	1.03043	0.753755
P60866	40S ribosomal protein S20	RPS20	13.373	119	18.1926	17.8068	17.0784	17.6515	17.3607	17.4687	17.6142	17.4046	16.9249	17.2986	16.831	16.759	17.4218	16.6269	16.3932	17.5823	16.9154	17.4141	16.696	17.2547	16.6699	17.2352	16.6832	16.8737	16.8344	17.1078	16.8073	16.8815	16.8837	16.3685	16.8923	17.09	16.7542	16.824	16.7168	17.0579	16.8997	15.955	17.1728	16.4612	1.4051	0.0101806	1.34378	0.00106578
P18621	60S ribosomal protein L17	RPL17	21.397	184	19.7975	19.5602	18.8386	19.3882	19.0651	19.285	19.44	19.3683	19.1088	19.3144	19.0268	18.7412	19.0268	19.1303	18.7586	19.2685	18.8834	19.0962	18.9245	19.3079	19.2074	19.0474	18.6806	19.0601	19.1857	19.6366	18.6646	19.2879	19.2154	18.9397	19.1607	19.0093	19.3288	19.2288	18.6661	19.1363	19.1417	19.1008	19.4578	18.4806	1.23132	0.0102262	1.06047	0.343649
Q7Z392	Trafficking protein particle complex subunit 11	TRAPPC11	128.88	1133	15.5846	15.8738	16.2468	15.7864	15.6004	15.9229	16.0154	15.9508	15.882	16.2451	16.3208	16.058	16.0182	16.3417	16.072	15.9179	16.2139	16.0386	16.3465	16.267	16.4466	16.1042	16.1183	16.2941	16.6066	16.1934	15.7891	16.2968	16.2892	16.5117	16.4403	16.2062	16.3868	16.4086	16.0862	16.4555	16.2305	16.2836	16.1409	15.9324	0.84169	0.0102688	0.855048	0.00191185
Q8N3P4	Vacuolar protein sorting-associated protein 8 homolog	VPS8	161.75	1428	16.6964	16.5865	16.8212	16.7639	16.9024	16.6018	16.5646	16.8341	16.7207	16.9639	16.7252	17.1719	17.0371	16.8745	17.329	16.7263	17.12	16.7646	17.0247	16.9067	16.7522	16.7975	16.9586	16.6544	16.6142	16.549	16.9806	17.006	17.1387	17.0571	16.8298	16.8858	16.9537	16.6411	16.6567	16.5862	17.3076	16.8304	16.5027	16.8847	0.857109	0.0102742	1.0192	0.679646
P51884	Lumican	LUM	38.429	338	19.4694	19.4799	20.5925	19.717	19.6576	19.4304	19.8888	19.8257	19.7916	20.533	20.8732	20.054	21.1167	20.3307	20.1649	19.9249	20.5243	19.7049	21.0636	20.3705	20.8379	21.0353	20.3094	21.1488	21.0238	20.4931	20.1933	20.6076	20.9864	21.6998	20.828	20.9764	21.0224	20.9149	19.9204	20.7923	20.8284	21.219	20.4683	20.3667	0.671669	0.0103038	0.633783	7.93677e-05
P01019	Angiotensinogen	AGT	53.154	485	16.1621	16.4163	16.6345	16.1485	16.0495	16.0862	16.117	16.0221	15.8925	16.3621	16.4956	16.1942	17.0565	16.7656	16.895	16.229	16.4636	16.0332	16.8382	16.5491	16.9588	16.4994	16.7297	17.2028	17.4698	16.8415	16.9818	17.3023	17.5258	16.8198	16.498	16.989	16.5059	17.3538	16.6345	17.0999	16.5431	17.457	17.0938	16.7508	0.77759	0.010327	0.66327	2.42853e-06
Q9HD33	39S ribosomal protein L47, mitochondrial	MRPL47	29.45	250	16.5267	16.5655	16.2864	16.5053	16.6283	16.6164	16.7468	16.41	16.0643	16.1743	15.7606	16.5247	15.9454	15.8987	16.4765	16.6548	16.2107	15.8198	15.6808	15.6487	15.7177	16.8908	16.4892	15.9626	16.0073	15.7924	16.3464	15.8323	15.8859	15.382	15.8969	15.6632	15.734	16.0006	16.5408	16.1892	16.172	15.8235	15.9273	15.9792	1.31071	0.0106321	1.18556	0.0340079
Q8TBC4	NEDD8-activating enzyme E1 catalytic subunit	UBA3	51.852	463	17.8004	18.2856	17.9206	17.6967	17.6921	18.1165	18.0147	17.5691	17.9636	18.007	17.7666	17.6403	17.7843	17.4627	17.7186	17.686	17.69	17.8377	17.7446	17.4664	17.8357	17.7843	17.8425	17.7404	17.9802	18.1071	17.7844	17.6716	17.8686	17.6265	18.0759	17.7249	17.5087	17.8915	17.3018	17.649	17.7655	17.2634	17.8101	17.6545	1.17032	0.0106911	1.03443	0.47089
P11940	Polyadenylate-binding protein 1	PABPC1	70.67	636	19.7238	19.9913	19.3929	19.5554	19.6518	19.9163	19.6739	19.6909	19.7109	19.5564	19.3438	19.5461	19.2375	19.166	19.8026	19.4927	19.1761	19.6871	19.3858	19.5436	19.5774	19.4903	19.437	19.279	19.2123	19.8917	19.1613	19.3261	19.282	19.1679	19.5671	19.4119	19.3561	19.4903	18.8302	19.3464	19.4309	18.9844	19.596	19.1367	1.18775	0.0107157	1.15948	0.00606794
P62306	Small nuclear ribonucleoprotein F	SNRPF	9.7251	86	18.4889	18.5617	18.1806	17.9346	17.8523	18.8426	18.2592	18.3021	17.8869	17.3437	17.0373	17.6801	17.9348	16.8462	16.8875	18.4944	17.4455	17.7793	16.9187	18.1315	17.2976	17.6827	18.2115	17.3339	17.2244	17.2097	16.8326	17.7928	17.6943	17.0264	17.5234	17.4785	17.7111	17.3713	16.7306	17.6281	17.3433	16.9922	17.5324	16.4956	1.56886	0.0107502	1.39937	0.00472716
Q9Y5L4	Mitochondrial import inner membrane translocase subunit Tim13	TIMM13	10.5	95	17.5568	17.5308	17.1751	17.484	17.5184	17.3064	17.3634	16.9776	17.1384	17.2848	17.112	17.0385	17.1205	17.0211	17.3953	17.4268	16.9708	17.026	16.7635	16.9768	17.2745	17.0142	17.4268	17.1224	16.8558	16.9441	17.4145	16.9889	16.8032	16.6511	17.4946	16.9106	16.8725	17.2266	17.1289	17.2726	17.2376	16.6153	17.2558	17.1659	1.18791	0.011041	1.09093	0.107016
P02730	Band 3 anion transport protein	SLC4A1	101.79	911	18.3335	18.1781	18.3251	18.3232	18.068	18.3534	18.2243	18.3211	18.4642	18.5457	19.1909	18.3508	18.9034	18.8564	18.6475	17.9948	19.5535	18.2675	19.2667	18.6205	19.053	18.8873	18.2534	19.0258	19.3535	19.4798	19.1559	19.1331	18.7866	20.2948	18.4684	19.717	20.1951	18.993	19.65	18.4257	18.4285	20.5419	19.0111	20.0857	0.731267	0.0111552	0.612356	0.000249646
Q9HBL0	Tensin-1	TNS1	197.02	1839	18.8961	18.4833	18.8445	18.892	19.0139	18.6262	18.932	18.6955	18.7657	19.1051	19.243	19.1086	19.3892	18.9869	19.2943	18.7522	19.0582	18.7795	19.3976	18.9266	19.1932	19.0108	18.8607	19.1372	19.669	19.0346	19.2674	19.0802	19.1582	19.5468	18.9982	19.096	19.4744	19.2071	18.7321	18.9842	18.973	19.6399	18.7248	19.516	0.830354	0.0111879	0.867132	0.0184686
O95159	Zinc finger protein-like 1	ZFPL1	34.114	310	15.9428	15.7129	15.469	15.7805	15.712	15.6188	15.4735	15.6116	15.3432	15.8009	15.6022	15.5221	15.5002	15.389	15.2472	15.4144	15.5158	15.607	14.968	15.3382	15.0131	15.3745	15.2764	15.3607	15.5712	15.4312	15.9234	15.7222	15.9083	15.3413	15.2313	14.9656	15.2752	15.3522	15.4637	15.353	14.9099	15.0783	15.193	15.4931	1.17782	0.0112201	1.12241	0.0408091
Q99757	Thioredoxin, mitochondrial	TXN2	18.383	166	18.358	18.1299	18.3715	18.6856	18.3227	18.7461	18.1544	18.6647	17.519	18.3198	17.466	18.0706	18.1538	17.5359	17.821	18.4491	18.1924	17.9356	17.7968	17.5565	17.6296	18.0976	18.8249	17.8404	18.0533	17.5241	18.5533	18.135	18.0472	18.1865	17.8567	18.1716	18.1181	17.8039	18.607	18.476	17.7948	17.4158	18.1372	18.0003	1.34667	0.0112325	1.03441	0.686267
Q15848	Adiponectin	ADIPOQ	26.413	244	16.1206	15.9406	16.2561	15.8965	16.5398	16.0112	16.1884	16.1294	16.34	16.2376	16.3145	16.3427	16.2238	16.5922	16.7854	16.2853	16.6245	16.0455	16.7295	16.4542	16.4422	16.6221	16.416	16.702	16.2755	16.2636	16.79	16.5288	16.7871	16.8616	16.5276	16.4598	16.3162	16.7738	16.7775	16.4016	16.4426	16.9	16.5755	16.6756	0.827168	0.0112775	0.826977	0.00050028
Q14152	Eukaryotic translation initiation factor 3 subunit A	EIF3A	166.57	1382	20.5736	20.3804	20.1403	20.2686	20.3565	20.5761	20.1379	20.2834	20.5167	20.2529	19.9049	20.0824	20.1928	20.1551	20.2311	20.2944	19.9663	20.4073	19.8869	20.2427	20.2439	20.3061	20.0425	20.0106	19.8173	20.4073	19.7358	20.0771	20.1271	19.9059	20.2071	20.1551	20.0645	20.1511	19.5112	20.0374	20.3048	19.6267	20.131	19.8268	1.15847	0.0113018	1.15511	0.00426593
Q92785	Zinc finger protein ubi-d4	DPF2	44.155	391	17.2582	17.3175	17.4135	17.0271	17.0086	17.5477	17.657	17.4844	17.0064	17.0746	16.7343	17.1074	17.3159	16.509	16.7901	17.4597	16.9816	16.977	16.6039	16.8733	16.9879	17.0374	17.3048	17.1212	16.8051	16.9497	16.8682	17.0921	17.0507	16.8567	17.0355	17.3611	16.883	17.134	16.7286	17.0533	16.9091	16.7671	17.1343	16.9266	1.26952	0.0113078	1.077	0.191143
P07738	Bisphosphoglycerate mutase	BPGM	30.005	259	17.9435	17.3049	17.5492	17.8967	17.9503	17.6531	17.6867	17.6793	17.5405	18.0146	18.0267	17.6908	18.1683	18.0993	17.9758	17.7316	18.2359	18.3218	17.856	17.8734	17.7852	17.9	17.3041	18.0822	18.0124	17.8967	17.9719	17.9734	17.8444	18.5938	17.6356	18.2753	18.5315	17.9729	18.2159	18.0171	18.2494	18.9036	17.7935	18.5019	0.825823	0.0114254	0.862662	0.0392812
Q8N8V2	Guanylate-binding protein 7	GBP7	72.512	638	17.8789	17.5363	17.3919	17.3452	16.9786	18.0382	17.7058	17.0664	19.0307	16.8704	16.4152	17.0442	16.9279	16.4611	16.9714	17.466	17.2315	17.3241	16.8536	16.6887	18.6129	17.9938	16.9468	17.5603	17.1324	16.8644	16.7973	17.5805	17.4723	16.5292	17.5144	16.7111	17.3187	17.8067	16.6511	16.7185	16.9092	17.8017	18.4492	17.0501	1.56468	0.0114607	0.959457	0.753853
P02724	Glycophorin-A	GYPA	16.331	150	15.5539	15.5681	15.8036	15.8429	15.8697	15.9658	16.0756	16.0878	16.2557	16.6213	17.5461	16.1836	16.9529	16.3758	16.1455	15.77	17.3312	16.0497	17.5842	16.2983	16.8916	16.4797	15.9321	17.1753	17.6038	17.2792	16.8494	16.6906	16.8512	18.6963	16.4261	17.7109	18.0577	17.3913	17.3175	16.6121	16.5528	18.4138	16.9785	17.8296	0.633185	0.0115492	0.53854	0.000124183
P14555	Phospholipase A2, membrane associated	PLA2G2A	16.083	144	16.1446	15.9059	16.5309	15.9713	15.9049	15.6242	16.6457	15.7994	15.9772	16.1331	19.9024	17.2672	17.0383	16.6042	16.5953	15.746	16.7244	16.6257	17.919	16.6337	16.5237	16.3292	16.7257	16.5788	17.1317	16.6492	17.8818	16.4866	16.0891	16.6474	16.2585	15.7243	16.2644	16.1528	16.1462	18.7665	16.5955	15.8888	16.3066	17.1341	0.485683	0.0115773	0.979838	0.912909
P20674	Cytochrome c oxidase subunit 5A, mitochondrial	COX5A	16.762	150	18.0243	18.0143	17.9942	18.1896	18.0088	18.075	17.9846	18.0158	17.9187	17.9327	17.8521	17.9149	17.6516	17.7729	17.8948	18.0963	18.1475	17.6814	17.7311	17.8025	18.0686	18.0018	18.1527	17.9753	18.075	18.1122	18.9966	18.0862	17.9291	17.8962	18.2978	17.9426	17.7896	17.985	19.0585	18.5711	17.9553	18.2568	18.1169	18.3999	1.11828	0.0116373	0.841945	0.00505074
P31689	DnaJ homolog subfamily A member 1	DNAJA1	44.868	397	18.9888	19.489	18.647	19.308	18.8624	18.6887	18.6708	19.2522	18.5421	18.2328	18.267	18.4596	18.6155	18.493	18.1567	18.7593	18.626	18.7631	18.244	18.3323	18.54	18.3143	18.5771	18.3063	18.276	18.2692	18.209	18.4093	18.388	18.2719	18.6911	18.2913	18.4705	18.3593	18.3003	18.3063	18.6245	18.3722	18.3978	18.2285	1.31633	0.0116649	1.22244	0.00210726
Q92629	Delta-sarcoglycan	SGCD	32.071	289	13.7762	13.8195	13.8539	14.1851	13.8416	13.8117	14.2109	13.8008	13.9172	14.1377	14.9722	14.2026	14.7057	13.8879	14.316	14.0776	15.7886	13.8977	14.9021	14.147	15.229	14.3337	13.8129	14.7577	15.1819	13.921	15.4605	14.0884	14.1282	15.0363	14.7759	14.4605	14.7194	14.7154	15.1337	14.5075	14.2872	14.0473	14.0977	15.1211	0.680988	0.0117275	0.769409	0.0229646
P12004	Proliferating cell nuclear antigen	PCNA	28.768	261	17.9556	18.1478	17.2911	17.8027	17.7365	18.2444	17.6834	17.8829	17.8958	17.2838	17.009	17.8459	17.3644	17.4013	17.5136	17.3965	17.3352	17.4994	17.2425	17.7816	17.5345	17.5503	17.3076	17.307	17.1869	17.4015	16.9365	17.374	17.385	17.3079	17.4735	17.2063	17.2666	17.548	16.9337	17.1505	17.3956	17.7446	17.6224	17.0217	1.27762	0.0118935	1.21669	0.00277491
Q8TDH9	Biogenesis of lysosome-related organelles complex 1 subunit 5	BLOC1S5	21.609	187	14.8407	14.8281	14.9681	14.7718	14.7247	14.8272	14.8515	14.7811	14.8061	14.9614	14.7777	14.3507	14.9593	14.583	14.4648	14.87	14.5573	14.4928	14.6748	14.7811	14.8678	14.7197	14.8113	14.794	14.5449	15.061	14.6582	14.7536	14.6293	14.5213	14.9502	14.7812	15.0502	14.7261	15.4603	14.6163	15.0691	14.6231	15.4625	14.9633	1.13675	0.0119606	0.926878	0.130759
Q14061	Cytochrome c oxidase copper chaperone	COX17	6.9151	63	16.0641	15.7007	16.2384	16.1768	16.0435	15.694	15.7314	16.617	15.1291	15.9597	15.1349	15.383	15.782	15.3463	15.5507	16.1768	15.48	15.7028	14.8993	15.0092	14.9801	15.1415	16.1084	15.1048	15.8313	15.1657	16.769	15.457	15.384	14.528	15.0622	15.2231	15.3279	15.0622	17.0286	16.2508	15.0717	14.46	15.2926	15.475	1.40344	0.0122181	1.19316	0.164929
Q96BY9	Store-operated calcium entry-associated regulatory factor	SARAF	36.975	339	12.9085	12.8115	12.8804	13.0526	13.5424	12.5059	13.0871	13.1153	13.1888	12.9245	12.7154	12.742	12.4922	12.6089	13.095	12.6617	12.6083	12.7892	12.6764	12.8396	12.7981	13.1011	13.1465	12.7501	12.6407	12.577	12.6017	12.6975	12.5897	12.316	13.1927	12.6276	12.4592	12.7981	12.8357	13.0408	12.9267	12.6083	13.1636	12.575	1.21322	0.01228	1.06434	0.273293
Q8IWA5	Choline transporter-like protein 2	SLC44A2	80.123	706	13.8259	13.5528	14.671	13.8435	14.2573	13.9445	14.1022	14.3	14.2452	15.1099	15.9297	14.6147	14.4549	15.3538	14.508	14.3995	14.5549	14.402	15.4715	14.4479	14.7176	14.5765	15.05	15.3761	14.874	14.1337	14.8296	14.7291	15.2817	14.6842	14.9802	14.2675	14.0355	15.1646	14.4055	15.0269	14.6785	13.9648	15.2824	14.7743	0.646865	0.0123343	0.845473	0.140647
O94832	Unconventional myosin-Id	MYO1D	116.2	1006	18.4349	18.1373	18.8869	18.3626	18.2927	18.4574	18.5513	18.6311	18.3303	18.6216	18.621	18.5077	18.9277	19.0221	18.6974	18.6208	18.551	18.6127	18.6444	19.0693	18.5907	18.4797	18.6847	18.6226	18.5992	18.837	18.4223	18.7569	18.8039	18.6774	18.5546	18.7111	18.8788	18.6186	18.687	18.611	18.7061	18.9237	18.6924	18.353	0.836955	0.0125005	0.958249	0.332872
P62263	40S ribosomal protein S14	RPS14	16.273	151	19.0768	18.7801	18.1075	18.932	18.6676	18.6583	18.5672	18.4931	18.627	18.3707	17.7744	18.5673	18.0835	17.6291	18.5565	18.7354	18.0535	18.3307	17.7953	18.5488	18.122	18.4163	18.0808	18.048	17.806	18.4712	17.596	18.1465	18.1799	17.8121	18.3067	18.1716	17.8977	18.0959	17.602	18.0647	18.1525	17.2988	18.3001	17.4917	1.33843	0.0125618	1.33303	0.00072637
P32004	Neural cell adhesion molecule L1	L1CAM	140	1257	12.6243	12.3435	13.5264	12.9869	12.5687	12.2755	12.2587	12.1328	12.2373	13.3566	13.0484	13.4168	12.972	15.6406	13.8369	12.2882	13.8427	13.4991	13.2318	13.3342	12.9968	12.8544	13.2212	13.8724	13.1802	12.761	13.1722	13.7735	13.5568	13.6979	12.9326	13.1241	12.902	13.024	13.0695	12.8644	13.1549	12.8747	12.79	12.5336	0.543365	0.0126037	0.96812	0.817488
P63173	60S ribosomal protein L38	RPL38	8.2178	70	17.892	17.9046	17.7425	17.8636	18.0868	17.749	18.0888	17.8582	17.9791	17.8466	17.8279	18.0414	17.1629	17.1211	17.9343	17.5712	17.4305	17.7468	17.5723	17.721	17.843	17.7374	17.9309	17.5815	17.4925	18.1112	17.36	17.4801	17.5565	17.1605	17.835	17.6315	17.4394	17.8391	17.3834	17.5597	17.4517	17.5258	17.9357	17.2249	1.22111	0.0126216	1.1119	0.071331
P31949	Protein S100-A11	S100A11	11.74	105	20.2855	20.6856	19.9739	20.3992	20.242	20.5728	20.4085	20.2992	19.9986	19.4465	19.3231	20.2112	19.7493	19.692	19.8248	20.1786	19.6597	20.3371	19.5149	19.5681	19.7993	20.118	20.1811	19.8346	19.4385	19.4053	19.6402	19.9887	19.9124	19.4251	19.7889	19.4539	19.962	19.885	19.2249	19.5514	19.6052	19.7236	20.2226	19.8693	1.34286	0.0126642	1.20332	0.0188712
Q12797	Aspartyl/asparaginyl beta-hydroxylase	ASPH	85.862	758	19.902	20.05	19.7196	19.6974	19.4509	19.413	20.0111	19.9317	19.6011	19.2784	19.2965	19.5425	19.6872	19.3625	19.4515	19.3213	19.4904	19.497	19.3991	19.456	19.3003	19.3372	19.6663	19.6018	19.3719	19.2168	19.1452	19.0806	19.1779	19.3414	19.3597	19.2922	19.7903	19.2697	19.0436	19.497	19.9429	19.3325	19.1307	19.2517	1.19344	0.0126946	1.16512	0.00565567
Q14515	SPARC-like protein 1	SPARCL1	75.207	664	14.5048	14.2686	14.6516	14.5789	14.5481	14.1924	14.5818	14.6652	14.7714	14.3948	14.9536	14.8899	15.1486	15.085	14.3762	14.4868	14.8224	14.6831	15.0331	14.5241	14.8663	14.5399	14.6051	14.9257	15.3024	14.3195	14.9923	14.5005	14.5734	15.0041	14.4384	15.049	14.6017	14.7249	15.2847	14.9854	14.5436	14.8153	14.9364	15.3191	0.821025	0.0127527	0.896045	0.0847664
P13984	General transcription factor IIF subunit 2	GTF2F2	28.38	249	17.483	17.4852	17.4643	17.3028	17.547	17.4699	17.5364	17.5032	17.7945	17.0681	16.8516	17.2369	17.0614	17.0895	17.5474	17.7126	17.1249	17.1103	16.8723	17.1918	17.4308	17.2677	17.6762	17.0886	16.8959	17.6378	16.7353	17.1711	17.2694	16.752	17.3239	17.104	17.0339	17.0651	17.6246	17.1494	17.5059	16.8642	17.3817	16.8416	1.21889	0.0128019	1.09559	0.14596
P24043	Laminin subunit alpha-2	LAMA2	343.9	3122	18.2508	18.0595	19.0168	18.7886	18.5932	18.3933	18.3341	18.3049	18.7569	18.836	19.1728	18.6683	18.7306	19.3811	19.0148	19.0566	20.7597	18.5142	19.3091	18.8696	18.6026	19.0535	19.1538	19.2848	19.034	18.5803	20.1853	19.1707	19.5739	19.0797	18.7455	19.2073	19.3139	18.831	20.7292	18.557	18.7646	19.2528	18.8346	19.9484	0.653267	0.0128117	0.782082	0.0555917
Q9P2R3	Rabankyrin-5	ANKFY1	128.4	1169	17.0809	17.1489	17.4361	16.9697	17.2625	17.0737	17.1798	16.9775	17.0551	17.5518	17.5006	17.3659	17.2045	17.5955	17.6864	16.9889	17.3552	17.3673	17.5383	17.6579	17.4384	17.2967	17.6103	17.4044	17.5552	17.4509	17.2845	17.4793	17.4885	17.7448	17.4851	17.4343	17.5413	17.5383	16.8839	17.4315	17.6207	17.6723	17.5109	17.2255	0.839472	0.012941	0.898122	0.0268708
Q12979	Active breakpoint cluster region-related protein	ABR	97.597	859	17.8384	17.9071	17.7735	18.0643	17.8637	18.0199	18.19	17.6965	17.9745	17.8897	18.0434	18.2434	17.9908	18.0525	18.2601	17.992	18.3081	17.9623	18.0092	18.038	18.1876	17.9908	17.8624	17.8823	17.9292	17.7508	17.7139	17.9313	17.8303	17.9869	18.0386	18.0744	18.0963	17.8374	17.5625	17.8811	18.0211	18.2385	17.793	17.8958	0.889937	0.0132549	1.05749	0.120031
Q9BY44	Eukaryotic translation initiation factor 2A	EIF2A	64.989	585	18.7298	18.7757	17.6448	18.6951	17.6069	18.4384	18.096	18.3393	18.6203	17.8731	17.6016	17.7048	17.9983	17.6396	17.3345	18.5162	17.7924	17.7793	17.6648	18.0074	17.5937	17.9642	17.6481	17.9646	18.0355	17.5733	17.6079	17.7069	17.731	17.567	17.6269	17.6678	17.7718	18.0222	17.817	18.1951	17.4172	17.7306	18.2248	17.7245	1.39283	0.0132586	1.2003	0.0241836
P22105	Tenascin-X	TNXB	458.38	4244	19.8165	19.6595	20.5131	20.0378	20.2992	20.0173	19.9085	19.9957	20.357	20.8272	20.9697	20.2612	20.7665	20.7665	20.5948	20.0738	20.2303	20.2383	21.2309	20.7771	20.5999	21.2617	20.6954	21.8202	21.4927	21.0492	20.7308	21.1208	21.6302	21.5809	21.0171	21.6569	20.7973	21.5395	20.5883	21.007	20.6858	20.8834	21.1939	20.6019	0.733194	0.0133899	0.602652	2.14275e-06
Q02878	60S ribosomal protein L6	RPL6	32.728	288	19.3609	19.4333	18.6337	19.1272	18.705	18.9896	19.22	19.1049	19.3109	18.9492	19.0766	18.7994	18.5487	18.3997	18.5144	19.1942	18.5637	18.8471	18.3211	19.0501	19.2119	19.0192	18.8186	18.9026	18.6433	19.5409	18.2528	18.929	18.9322	18.4571	19.2676	18.8858	18.6687	19.1986	18.2953	19.0016	19.0611	18.1717	19.1877	18.3928	1.2763	0.0134365	1.0465	0.56297
P00488	Coagulation factor XIII A chain	F13A1	83.267	732	19.4114	19.3851	20.8088	19.4761	19.8106	19.5905	19.8144	19.434	19.6989	19.5193	20.3979	19.7855	20.657	20.1293	19.7668	19.6591	20.7251	20.1543	20.0457	20.6143	20.4128	21.3211	20.5434	20.4108	20.0362	20.2348	20.4129	20.5058	20.6703	21.1451	20.1421	20.7079	21.2342	20.455	20.3252	20.1502	21.7522	20.7044	20.1033	20.4906	0.707784	0.0134545	0.640071	8.46404e-05
Q6ZNB6	NF-X1-type zinc finger protein NFXL1	NFXL1	101.34	911	18.2751	18.3996	17.4457	18.0484	17.5499	17.9348	17.8497	17.9138	18.0118	17.7987	17.4782	18.1927	17.5307	16.9786	17.727	17.6652	17.1753	17.2689	17.929	17.1402	17.2883	17.3813	17.53	18.1613	17.3023	17.6801	17.6899	17.3062	17.3906	16.9567	17.7086	17.2296	17.0107	17.3347	17.1242	18.0214	17.1745	16.8125	18.1434	17.3524	1.33253	0.0136449	1.21902	0.0236987
P13995	Bifunctional methylenetetrahydrofolate dehydrogenase/cyclohydrolase, mitochondrial	MTHFD2	37.895	350	15.9611	16.454	15.4638	15.7599	15.3509	16.283	15.5953	15.8409	16.0329	15.9407	15.2734	15.8613	15.3499	14.9325	15.7426	15.1059	15.3909	15.5553	15.6792	15.7857	15.2864	15.4392	15.532	15.2008	15.3332	15.8566	15.118	15.2242	14.96	14.9451	15.4392	15.258	15.2073	15.3176	14.7437	15.5794	15.7626	15.1877	14.9016	15.0716	1.32005	0.0136478	1.31927	0.000535847
P62899	60S ribosomal protein L31	RPL31	14.463	125	17.6737	17.5048	16.7803	17.4895	16.8853	17.2667	17.4149	17.1574	17.0831	17.3011	16.877	16.8309	16.9148	16.3535	16.6683	17.278	17.1361	17.2041	16.8008	17.0749	17.0124	16.9472	16.7643	16.8117	16.7202	16.9588	16.8299	16.8004	16.972	16.787	16.9522	16.9195	16.8309	16.9765	17.3563	16.7916	16.7016	16.6637	17.4857	16.8132	1.26736	0.013691	1.13289	0.0420716
Q9UBP6	tRNA (guanine-N(7)-)-methyltransferase	METTL1	31.471	276	16.2807	16.5024	15.8679	16.6232	16.2929	16.5166	17.327	17.1812	16.7801	16.4397	15.644	16.404	15.6859	15.7998	15.9393	16.6469	16.1805	16.3759	15.4855	16.5158	17.841	17.6921	15.7927	17.4409	15.758	16.0196	16.0322	16.4658	16.5022	16.0625	16.952	15.9002	15.9416	17.1211	16.5599	15.9206	15.972	16.7125	18.5361	15.7624	1.42742	0.0137036	0.855715	0.292625
P62318	Small nuclear ribonucleoprotein Sm D3	SNRPD3	13.916	126	16.8506	17.1194	16.9662	16.8309	16.9108	17.1476	17.1468	17.0308	17.0341	16.6171	16.4588	17.0048	16.6692	16.4502	16.962	17.0347	16.4391	16.7646	16.2959	16.8385	16.6564	16.6897	17.1479	16.5316	16.4264	16.6529	16.1925	16.5116	16.5718	16.3134	16.8327	16.5674	16.5674	16.8175	15.9776	16.6335	16.8069	17.5547	16.6214	16.1743	1.20887	0.0137103	1.16168	0.0303106
P31947	14-3-3 protein sigma	SFN	27.774	248	22.7857	22.9052	21.0837	22.9822	22.395	22.4807	21.7429	21.7705	22.2509	20.5782	20.4851	21.1713	20.9813	20.9293	21.5084	21.4944	21.1893	22.6808	20.804	21.1481	21.6955	21.717	21.2534	21.1503	20.5476	20.8494	20.4488	21.5579	21.7114	20.953	21.465	20.8009	20.7927	21.6579	20.1529	20.6169	20.9309	21.178	21.7882	20.6934	1.8129	0.0137122	1.48484	0.0107291
Q86U42	Polyadenylate-binding protein 2	PABPN1	32.749	306	17.1817	17.4029	16.7591	16.4803	16.5194	17.378	17.091	17.1653	16.9065	16.3074	16.2005	16.5462	16.729	16.4674	16.2721	17.1188	16.3712	16.7152	16.0596	16.4479	16.2796	16.7209	16.8454	16.49	16.4792	16.4968	16.1181	16.68	16.5795	16.0585	16.6227	16.225	16.1832	16.551	16.1209	16.853	16.3481	16.2398	16.6991	16.2951	1.34386	0.0137437	1.19889	0.0182109
P10599	Thioredoxin	TXN	11.737	105	20.4475	21.3069	20.2635	21.663	20.4513	20.4334	20.5929	20.071	19.7623	19.644	19.5441	19.9123	19.6748	19.5936	19.9027	20.4513	19.7869	20.2895	19.6202	19.8757	20.1062	19.845	20.3637	19.9374	19.6626	19.4962	19.5098	20.2984	20.5681	19.7499	20.4824	19.7978	19.7054	20.1572	19.3149	19.7232	19.6946	19.8358	20.2775	19.488	1.51412	0.0138094	1.2005	0.0872276
Q16555	Dihydropyrimidinase-related protein 2	DPYSL2	62.293	572	20.1814	19.9933	20.6855	20.2544	20.2786	20.1327	20.5343	20.2728	20.3783	20.6506	20.6995	20.4147	20.5616	20.8427	20.5438	20.4786	20.6486	20.2466	20.7807	20.6159	20.8	20.8194	20.5691	20.74	20.7892	20.7892	20.3783	20.5652	20.9844	21.0538	21.056	20.8519	20.8628	20.7788	20.3038	20.7476	21.2267	20.8095	20.4893	20.4425	0.842595	0.0138208	0.816116	0.000349291
P83436	Conserved oligomeric Golgi complex subunit 7	COG7	86.343	770	17.3822	17.4033	17.7325	17.3189	17.2231	17.4457	17.5348	17.3614	17.289	17.8692	17.858	17.5995	17.5097	18.41	17.7635	17.5236	17.5814	17.5067	18.0243	17.8204	17.6009	17.5802	17.7615	17.69	18.0546	17.6588	17.8178	17.8336	17.5778	17.7377	17.6223	17.664	17.7401	17.5802	17.1366	18.0302	17.8155	17.3516	17.4247	17.7006	0.810175	0.0138816	0.958546	0.449063
Q92743	Serine protease HTRA1	HTRA1	51.286	480	14.7348	14.5381	14.2549	14.4601	14.2318	14.1158	14.7734	14.2282	14.2885	14.9564	15.0702	14.9297	14.7834	14.8499	14.7754	14.4013	14.3926	14.7608	15.1139	14.7081	14.2182	14.4619	14.2414	14.4107	14.5923	14.57	14.508	14.5448	14.4111	14.9397	14.3049	14.4899	14.2414	14.1894	14.313	14.6605	14.5018	14.974	14.8681	14.5725	0.800877	0.0138997	1.085	0.175152
P54803	Galactocerebrosidase	GALC	77.063	685	16.8235	16.5617	17.0733	16.8634	17.0194	16.6881	16.8027	16.7055	17.1456	17.0399	17.1111	16.9485	17.1228	17.3159	17.1135	16.9246	16.9616	17.107	17.0674	16.9835	16.9986	16.8432	17.0972	16.9561	17.3444	17.2292	17.4973	16.899	17.0767	17.0475	17.0965	16.8565	17.4923	16.994	17.2159	17.3639	17.2611	17.0786	16.757	17.2291	0.874619	0.0139603	0.902648	0.0229955
P62995	Transformer-2 protein homolog beta	TRA2B	33.665	288	16.8758	17.4079	16.0573	17.1281	16.2371	16.9481	17.0232	17.212	17.0737	16.1595	15.9555	16.2978	16.274	16.4358	16.216	16.9903	16.1081	16.3018	16.0638	16.6106	16.2862	16.1576	15.9641	16.4132	16.2902	16.5359	15.8424	16.4807	16.5016	16.184	16.5914	16.2783	16.1834	16.4488	16.5129	16.0765	16.2054	17.4281	16.556	15.6515	1.40144	0.0139919	1.1805	0.0756935
Q9BSD7	Cancer-related nucleoside-triphosphatase	NTPCR	20.713	190	14.3592	14.8432	13.9332	14.6412	14.3888	14.2088	14.6111	14.4975	14.2052	14.2865	13.9553	14.1028	14.3148	13.4706	14.0179	14.5575	14.1958	14.2735	13.8264	13.4343	13.8736	13.7205	14.1488	13.6658	13.645	14.0231	13.7369	13.6007	13.8755	13.9473	13.6712	13.6147	14.1056	13.5267	13.7849	13.638	14.0405	13.4996	13.7851	13.473	1.30368	0.0140279	1.35412	3.36532e-05
Q9BZE1	39S ribosomal protein L37, mitochondrial	MRPL37	48.117	423	18.1724	18.5553	18.0542	17.8829	18.3616	18.1718	18.0476	18.3127	18.3645	18.0273	17.9353	18.0591	18.0653	17.7355	18.0734	18.0599	17.7995	18.1326	17.891	18.1	18.0734	18.1724	18.0542	18.1881	18.0385	18.1868	18.2494	18.1222	18.2132	17.861	18.2195	18.0934	17.6848	18.3143	18.6077	18.4066	18.1373	17.7348	18.3255	18.2847	1.15657	0.0141168	0.960407	0.379716
P49356	Protein farnesyltransferase subunit beta	FNTB	48.773	437	15.1837	15.1541	14.7872	15.2771	14.8362	15.1493	15.2356	14.6475	14.846	14.7669	14.6914	14.6354	14.7687	14.6453	14.7734	14.8198	14.6118	14.8696	15.1022	14.3079	14.7365	14.8464	14.7785	14.738	14.6101	14.6384	14.5987	14.6267	14.7583	14.6734	14.6742	14.4215	14.6058	14.6957	14.191	14.6082	14.6802	14.7282	14.7678	14.6631	1.2023	0.0142546	1.15142	0.00326476
P08708	40S ribosomal protein S17	RPS17	15.55	135	18.5036	18.5952	18.2655	18.7565	18.427	18.4584	18.5151	18.4253	18.2123	18.334	18.2617	18.2531	17.9181	18.1944	18.2013	18.5181	18.1022	18.4354	18.1635	18.413	18.4021	18.5549	18.2438	18.1686	18.0515	18.3637	18.0767	18.3462	18.2859	17.9648	18.3953	18.1392	18.0092	18.4369	17.8966	18.1542	18.0492	17.9819	18.5348	17.8132	1.15122	0.0142825	1.11284	0.0221547
Q9UI09	NADH dehydrogenase [ubiquinone] 1 alpha subcomplex subunit 12	NDUFA12	17.114	145	16.1802	16.4509	16.5937	16.0957	16.5393	16.5246	16.4431	16.1735	16.3626	16.3874	16.6753	16.4973	16.3528	16.818	16.7946	16.8907	16.8777	16.2957	16.6451	16.3585	16.5392	16.3832	16.5946	16.3346	16.4258	16.7551	17.3142	16.3178	16.2732	16.1361	16.415	16.3699	16.4785	16.2617	17.4985	16.577	16.5031	16.3154	16.2791	16.809	0.84353	0.014289	0.978599	0.739031
Q01469	Fatty acid-binding protein, epidermal	FABP5	15.164	135	22.3676	22.3332	20.3217	21.9531	22.0172	21.6658	21.5804	22.2844	21.0199	19.5725	19.7379	19.8174	20.1981	20.2832	20.5397	20.6643	20.323	22.602	20.0861	20.2576	20.3344	22.1234	20.459	20.7328	19.9377	20.0432	20.0621	20.5024	20.9227	20.5087	20.2496	19.8378	20.2252	21.3995	19.9536	20.0105	20.1305	20.3383	21.7311	20.2059	2.08583	0.0142997	1.41014	0.0690884
Q6UXI7	Vitrin	VIT	73.929	678	14.718	14.5332	15.0979	15.246	15.38	15.0351	14.6846	14.7956	15.2259	15.8546	17.3034	15.7081	15.3798	15.3699	15.4657	15.0031	15.8617	15.6481	18.0523	15.6687	16.5911	16.2188	15.2769	15.9572	16.3102	15.6419	16.426	16.8095	16.8756	16.3725	16.159	16.2539	16.0588	16.7971	16.3763	16.1324	15.631	16.0777	16.1072	16.229	0.539998	0.0143399	0.609826	0.00157673
P00734	Prothrombin	F2	70.036	622	18.8004	18.4999	19.4573	19.0382	18.5645	18.8431	19.1348	18.8653	18.9207	19.1309	19.2994	19.7418	19.5962	20.6026	19.7846	18.6505	19.4453	18.9349	19.3108	19.1009	19.6202	19.1544	19.0721	20.1059	19.9081	19.5448	19.5823	19.7362	19.7634	19.8481	19.2343	19.5718	19.4859	19.7595	19.3288	19.7171	19.3658	20.0238	19.6361	19.5465	0.696788	0.0144078	0.75046	0.00234875
O95470	Sphingosine-1-phosphate lyase 1	SGPL1	63.523	568	16.4897	16.7626	16.4811	16.8696	16.7347	17.3515	16.8742	16.8983	16.5886	15.8246	15.9269	16.9745	16.1662	15.7795	16.2552	16.2235	16.0868	16.8038	15.7818	16.0881	16.4661	16.1254	16.5131	16.1196	15.812	16.2159	15.677	16.2406	16.1897	15.9733	16.5682	16.0875	16.0518	16.2876	15.7298	15.957	16.2868	15.8906	16.4202	15.8375	1.39364	0.0144506	1.25316	0.00858811
P16157	Ankyrin-1	ANK1	206.26	1881	18.2593	18.0079	18.2516	18.4236	18.8224	18.4039	18.1464	18.2579	18.3532	18.5711	18.9102	18.4212	18.8551	18.6702	18.7439	18.0517	19.372	18.4542	19.1254	18.6377	18.5826	18.6588	18.5581	18.8935	19.0996	19.0457	19.0983	19.14	18.8413	19.9187	18.2882	19.497	19.7576	18.7675	20.1683	18.3471	18.37	20.4103	18.7382	19.8438	0.771422	0.0145224	0.676291	0.00126071
P25098	Beta-adrenergic receptor kinase 1	ADRBK1	79.573	689	16.8069	16.7064	16.7808	16.9629	16.7732	16.7612	16.5416	16.8071	16.7844	16.6538	16.677	17.0526	16.9516	17.1269	16.9641	16.6857	16.8178	16.9232	16.9136	17.1892	16.7306	17.0178	16.8414	16.7386	16.8991	17.1688	16.9528	17.0612	16.9024	17.2542	16.6385	16.8538	16.9182	17.0326	16.8898	16.8379	16.8795	17.4841	16.928	16.729	0.887394	0.0147701	0.936976	0.109797
P04075	Fructose-bisphosphate aldolase A	ALDOA	39.42	364	20.6468	21.0164	20.6595	21.5267	20.9922	20.9566	20.6656	21.1545	20.6331	20.5329	20.3964	20.6784	20.5519	20.4829	20.6784	20.4681	20.7372	20.9005	20.316	20.5496	20.5034	20.5629	20.8757	20.7279	20.6356	20.429	21.4611	20.8081	20.6085	20.6085	20.4745	20.3804	20.547	20.905	21.8456	20.5758	20.2738	20.5337	20.9466	21.3996	1.23326	0.0148436	0.980803	0.800977
Q8WXG6	MAP kinase-activating death domain protein	MADD	183.3	1647	14.1598	13.6191	14.1661	14.0229	13.8844	14.1544	13.9357	13.7982	13.809	14.4565	14.2583	14.204	14.1489	14.4671	14.0937	13.8733	14.4599	14.5867	14.4354	14.2205	14.5338	14.2111	14.0873	14.1044	14.4192	14.3307	14.4336	14.4751	14.2683	14.7352	14.0897	14.4336	13.8898	14.0605	14.2072	14.1713	14.3357	14.8239	13.8506	14.5371	0.826934	0.0151123	0.893652	0.0554451
Q6YHU6	Thyroid adenoma-associated protein	THADA	219.6	1953	15.9286	16.3018	15.9711	16.2081	15.6567	16.2236	16.0775	16.1398	16.1376	16.1968	16.2302	16.3958	16.0989	16.1109	16.5568	16.1095	16.3419	16.2345	16.5723	16.3788	16.2942	16.0845	16.0129	16.1352	16.5737	16.3475	16.1765	16.6197	16.4581	16.7379	16.1109	16.3567	16.3325	16.1853	16.2622	16.559	16.2081	15.9622	16.0831	16.2131	0.85926	0.0152354	0.938156	0.176699
Q01968	Inositol polyphosphate 5-phosphatase OCRL-1	OCRL	104.2	901	15.6199	15.197	15.1347	15.1435	15.4714	15.7094	15.4963	15.3811	15.4757	15.5794	15.175	15.1532	15.2441	14.8426	15.3384	15.5779	14.9336	15.2567	15.1011	15.151	15.0623	14.8808	15.0589	14.915	14.9757	14.7764	14.7964	14.7655	14.8666	14.9303	15.136	15.2952	15.6172	14.9604	14.6888	15.3382	14.6237	14.5807	15.0971	14.891	1.18385	0.0154373	1.26251	9.29448e-05
P28702	Retinoic acid receptor RXR-beta	RXRB	56.921	533	15.9203	15.6311	15.6938	16.0513	15.7765	15.7471	15.481	15.8311	15.7465	16.3317	15.2033	15.6438	15.5427	15.498	15.8257	15.8174	15.4674	15.6337	15.5135	15.5553	15.3187	15.3549	15.9091	15.3461	15.3179	15.4121	15.4062	15.8247	15.7572	15.7097	15.3475	15.5937	15.7886	15.3834	15.8313	15.4868	15.4442	15.6462	15.3433	15.2187	1.19	0.0156157	1.12782	0.0211177
Q6NXG1	Epithelial splicing regulatory protein 1	ESRP1	75.585	681	16.9761	17.5102	16.3864	16.9056	16.587	17.1372	16.9208	16.8672	17.1459	16.4167	16.3882	16.6422	16.4397	16.5154	16.5261	16.9314	16.5121	16.8039	16.2983	16.4361	16.5636	16.8036	16.5854	16.5159	16.3038	16.0616	16.1893	16.6457	16.8565	16.101	16.6135	16.3864	16.3344	16.6899	16.122	16.3056	16.0413	15.9783	16.8694	16.3614	1.26224	0.0156335	1.23191	0.00329501
P67809	Nuclease-sensitive element-binding protein 1	YBX1	35.924	324	18.0125	17.4192	16.9308	17.8134	17.1411	17.6369	17.4947	17.397	16.9309	16.4346	15.8201	16.8968	16.9493	16.8802	16.8507	17.7263	16.3902	16.9251	16.1021	16.7274	16.1016	16.3502	16.8125	16.0362	15.8283	16.1076	16.0547	16.279	16.3575	16.0673	16.3502	16.3291	16.6548	16.389	15.8703	16.1093	15.6997	16.2098	16.3564	15.6336	1.50974	0.0157241	1.79513	8.74249e-07
P18754	Regulator of chromosome condensation	RCC1	44.969	421	17.9529	17.8498	17.5768	18.0672	17.1802	17.7218	17.6855	17.8814	17.4322	17.4159	17.2274	17.2464	17.8716	17.2007	16.9578	17.7677	17.1726	17.245	17.1642	17.5331	17.277	17.1839	17.3531	17.4241	17.3645	17.2569	17.0489	17.3476	17.3288	17.3387	17.4478	17.3156	17.4642	17.381	16.9959	17.4919	17.1932	17.3466	17.61	17.0604	1.26377	0.0157582	1.14552	0.0198864
Q5VYS8	Terminal uridylyltransferase 7	ZCCHC6	171.23	1495	15.6571	15.8305	15.2248	15.7967	15.5521	15.6121	15.4054	15.4531	15.7508	15.0168	15.1646	15.1986	15.2486	15.4328	15.1215	15.1353	15.1739	15.4787	15.3867	15.4617	15.1507	15.5256	15.2503	15.3156	15.2406	15.4645	15.151	15.3416	15.3416	15.1302	15.0732	15.1756	15.353	15.5193	15.1155	14.9919	15.0029	15.661	15.5677	15.1921	1.18896	0.0161743	1.09195	0.0736896
Q9BX66	Sorbin and SH3 domain-containing protein 1	SORBS1	142.51	1292	17.8866	17.4197	17.8633	17.5923	17.8847	17.9035	17.7623	17.6682	17.683	18.458	18.2557	18.0952	17.9263	17.9211	18.1043	17.9623	18.2955	17.9305	18.4394	17.9632	17.8565	19.9305	18.0585	18.2209	19.5392	18.3147	18.7568	17.8558	18.3321	18.7111	17.7437	18.0353	18.2678	17.9211	17.9389	18.0735	17.9557	18.0079	17.8676	18.7217	0.825202	0.0163684	0.782023	0.017028
P51888	Prolargin	PRELP	43.809	382	18.9666	19.4314	19.8337	19.3255	19.4001	19.1867	18.9159	19.1757	19.3822	20.4183	21.7419	19.6903	20.7438	20.0434	19.6936	19.3482	19.5523	19.6078	21.9556	20.2517	20.0038	20.002	19.899	21.0336	20.8651	20.2245	20.0712	20.6275	21.1004	21.297	20.4858	20.8376	20.2393	21.0412	19.5214	20.5568	19.8715	20.8189	20.7595	20.2197	0.551248	0.0164973	0.641465	0.00528652
P01031	Complement C5	C5	188.3	1676	18.9527	18.6305	19.8796	19.2217	19.1944	18.9362	19.2433	18.9227	19.0379	19.7504	19.97	19.6435	19.4183	20.47	19.5559	18.8147	20.0636	19.3078	20.0004	19.5609	20.0625	19.5993	19.5041	20.3883	19.9185	19.4402	19.6158	20.0303	19.9963	20.2421	19.5259	19.745	19.5592	19.9296	19.316	19.6006	19.6979	20.1321	19.8574	19.9029	0.705361	0.0164981	0.77138	0.00533842
P17987	T-complex protein 1 subunit alpha	TCP1	60.343	556	19.6469	19.7782	19.3964	19.7791	19.655	19.3897	19.2684	19.6277	19.3459	19.2706	19.2534	19.4173	19.3405	19.1779	19.2897	19.3612	19.3389	19.4676	19.3368	19.3572	19.3136	19.3945	19.4096	19.3209	19.1661	19.355	19.3121	19.3889	19.2838	19.4112	19.3288	19.3388	19.3577	19.4639	19.1635	19.1963	19.3779	19.6459	19.3779	19.3139	1.13426	0.0166316	1.05623	0.094833
Q8IZV5	Retinol dehydrogenase 10	RDH10	38.087	341	15.746	16.179	15.9477	15.4479	15.6268	16.2044	16.5975	15.4453	15.7838	15.3493	15.4967	15.2599	15.8866	15.4699	14.8628	15.5508	15.3805	15.2505	15.7383	15.3468	15.2288	15.6239	16.1973	16.07	16.0601	15.3006	15.3982	15.2138	15.4289	15.7317	15.9552	15.4924	16.319	15.4607	15.1922	16.1881	15.2407	16.4379	15.7083	15.0853	1.32731	0.0166691	0.973911	0.771318
P07900	Heat shock protein HSP 90-alpha	HSP90AA1	84.659	732	21.1136	21.9982	20.9802	21.434	20.9122	21.5405	21.1174	21.219	21.0255	20.7458	20.6	20.8712	21.044	20.6626	20.956	21.1988	20.8084	20.9122	20.6715	20.9562	20.6347	20.6111	20.8897	20.7354	20.7609	20.5294	20.4522	20.7721	20.6302	20.6204	20.8101	20.7088	20.6396	20.7465	20.469	20.7835	20.6407	20.7835	20.8427	20.4673	1.26624	0.0168238	1.28519	5.21277e-05
P19012	Keratin, type I cytoskeletal 15	KRT15	49.211	456	15.0023	15.443	15.4998	15.2043	15.5263	15.3288	15.0367	15.2452	15.6398	15.1184	15.7783	15.5222	17.0875	16.0011	16.0813	15.4134	15.7265	15.5671	15.8355	14.9771	15.912	15.5606	15.7189	18.023	15.9516	15.7191	17.0559	17.4192	15.6398	15.5137	15.8604	15.8823	15.9572	18.2794	15.3013	15.7563	15.9083	16.0507	16.1596	17.3114	0.709787	0.0168569	0.616723	0.00318964
Q15061	WD repeat-containing protein 43	WDR43	74.89	677	16.5038	16.5548	16.2163	16.4156	16.3546	16.3836	16.2404	16.3986	16.469	16.2237	15.9601	16.4801	16.0749	15.8991	16.4692	16.4612	15.8853	16.1763	15.9003	16.1774	16.1191	16.234	16.1539	16.0835	15.9145	16.1345	15.9266	16.079	16.0693	15.9195	15.9983	16.004	16.1539	16.176	15.6897	16.1699	16.2013	15.9628	16.14	15.9747	1.17092	0.0168859	1.15427	0.000924228
Q13469	Nuclear factor of activated T-cells, cytoplasmic 2	NFATC2	100.14	925	16.83	16.9541	17.0884	16.6902	17.2847	16.8858	16.7699	17.0681	17.0126	17.1487	17.131	16.9248	17.7478	18.1736	17.3649	16.9289	17.5245	16.9275	17.1688	17.6212	17.186	17.1242	17.029	17.2797	17.3352	17.8725	17.1161	17.5359	17.2439	17.5453	17.18	17.5258	17.5415	17.126	16.9881	17.3375	17.8332	17.6431	16.9342	17.2893	0.769475	0.0169952	0.8882	0.101225
Q99808	Equilibrative nucleoside transporter 1	SLC29A1	50.219	456	14.5144	15.3846	14.4555	14.7261	14.6079	14.4212	14.1661	15.1441	15.2586	14.5498	16.5428	15.4133	14.9973	15.2285	14.9823	14.7951	15.9745	14.6003	15.3179	15.203	14.7079	14.856	14.5818	15.0715	14.7846	14.638	15.0209	14.7157	14.9927	15.646	14.3418	14.8408	15.1984	14.6178	14.856	14.4908	16.4052	14.8145	14.6303	15.4905	0.667729	0.0170755	1.05636	0.633853
Q00059	Transcription factor A, mitochondrial	TFAM	29.096	246	16.8824	16.8207	16.8766	16.606	16.7625	16.7689	16.453	16.9082	16.796	16.8319	16.5485	16.4807	16.6932	16.0795	16.2145	17.122	16.3275	16.3321	16.3722	16.7616	16.6585	16.4798	16.8916	16.5814	16.4817	16.5714	16.6426	16.6812	16.5871	16.0978	16.7725	16.466	16.3532	16.6494	16.4414	16.7689	16.6901	16.4429	16.7669	16.2817	1.21204	0.0171617	1.04724	0.372782
Q9H9Q4	Non-homologous end-joining factor 1	NHEJ1	33.337	299	15.6761	15.8217	16.0106	15.8097	15.868	15.9839	15.8564	15.9002	15.852	15.7265	16.2575	15.8915	16.3042	15.8673	16.1381	16.0127	16.1688	15.6123	16.2229	16.001	16.1367	16.3779	15.8834	16.1373	16.1748	16.3014	16.8674	16.3493	15.999	16.1407	16.2667	16.1341	16.3575	16.2667	16.1258	16.2526	16.3296	16.3452	15.9205	16.8211	0.872281	0.0171865	0.806461	7.11442e-05
P16455	Methylated-DNA--protein-cysteine methyltransferase	MGMT	21.646	207	15.4885	15.0843	15.148	15.2206	15.2243	15.5055	14.8677	15.2624	15.5657	15.1581	14.7573	15.1672	15.0923	15.0343	14.4854	15.4788	14.7734	14.9512	14.6606	15.1325	15.0014	14.8628	15.0938	14.4273	14.8341	15.4529	14.6604	14.8225	14.9685	14.3641	15.3755	14.8439	14.6507	15.0139	14.5995	15.0403	14.9499	14.4847	14.8644	14.7163	1.23048	0.0172436	1.19049	0.00862209
P61353	60S ribosomal protein L27	RPL27	15.798	136	16.8305	17.0435	16.1788	16.8884	16.1	16.1724	16.4818	16.7607	16.1723	16.7753	16.3512	16.4617	16.2976	15.6982	15.7948	16.6495	16.1635	16.0324	15.8227	16.1991	16.6209	16.2749	16.259	16.3508	16.2309	16.9128	15.8984	16.2498	16.5378	16.424	16.6684	16.1065	16.1582	16.6399	16.3273	16.237	16.0665	16.2769	16.9025	15.6364	1.31339	0.0172535	1.00332	0.96583
Q969T9	WW domain-binding protein 2	WBP2	28.087	261	13.0896	12.8415	13.2302	12.4408	13.869	13.2734	12.7134	13.14	12.7734	13.5455	13.5185	13.6327	13.2255	13.8366	13.6801	13.3965	13.2445	13.1706	13.6074	13.5397	13.4982	13.3665	13.4982	13.4594	13.7179	13.5906	13.2743	13.7677	13.7476	13.3868	13.3369	13.4681	13.2565	13.4722	12.8564	13.6004	13.4374	13.2445	13.6151	13.1909	0.761267	0.0173376	0.900732	0.134254
Q9H5N1	Rab GTPase-binding effector protein 2	RABEP2	63.542	569	16.8115	16.8673	17.1169	16.8505	17.011	16.9912	16.9554	17.0516	17.3487	17.0532	17.3866	17.0873	17.1142	17.259	17.297	17.0441	16.978	17.1158	17.6152	17.1843	17.1939	17.115	17.0374	17.154	17.1185	17.3228	16.8682	17.2511	17.279	17.0744	17.2593	17.2895	17.1132	17.2385	16.7908	17.1662	17.1655	16.9375	17.1375	16.9137	0.869093	0.0174724	0.990087	0.795893
Q99832	T-complex protein 1 subunit eta	CCT7	59.366	543	20.372	20.5931	20.1762	20.5677	20.1341	20.1921	20.1391	20.3617	19.9464	19.9267	19.9229	20.0798	19.9913	20.2105	19.9715	20.2161	19.9414	20.1657	19.7821	19.8644	20.0143	20.0798	20.1043	20.0551	19.8228	20.0689	19.7911	20.1028	19.9845	19.8196	20.0412	19.9742	20.0705	20.0705	19.5694	19.9414	20.0328	20.1381	20.1475	19.9319	1.16988	0.0175953	1.10167	0.022945
Q9Y5Y7	Lymphatic vessel endothelial hyaluronic acid receptor 1	LYVE1	35.213	322	16.149	16.0554	16.636	15.9354	16.1523	16.0528	15.9652	15.9515	15.911	16.5963	17.1213	16.1221	16.1993	16.8796	16.2831	16.0805	16.9348	16.0826	17.1173	16.9209	16.7798	17.8356	17.1395	17.449	16.9182	16.9173	17.4047	17.4443	17.2772	17.8461	17.1732	17.2681	17.5006	17.3494	16.6114	17.0338	17.8054	16.9962	17.4675	16.8796	0.740375	0.0176795	0.536805	1.01513e-08
Q9Y580	RNA-binding protein 7	RBM7	30.503	266	16.001	15.8087	15.6832	16.0219	16.0101	16.3792	16.0399	15.8934	15.6494	15.5389	15.4847	16.0732	15.5825	15.1223	15.678	15.8048	15.374	15.9475	15.3013	15.4999	15.7664	15.678	15.6075	15.6531	15.4565	15.7845	15.1529	15.7334	15.8246	15.7839	15.9379	15.6442	15.6998	15.9056	15.1322	15.5349	15.4538	15.5916	15.6823	15.1324	1.24467	0.0177456	1.09955	0.125225
P01880	Ig delta chain C region	IGHD	47.499	430	16.7938	16.5117	18.0463	17.0368	16.9436	16.8741	16.9014	16.6131	17.1608	17.4503	17.818	17.614	17.1801	19.042	17.7446	16.8908	17.2914	16.9954	17.9844	18.9729	17.3223	17.1048	17.7398	17.7345	18.7728	17.587	17.545	17.3381	17.3675	17.7342	17.2724	18.2796	17.2059	17.634	17.6714	18.1217	17.1563	18.1134	17.6654	17.7946	0.607018	0.0177648	0.832341	0.156858
O60826	Coiled-coil domain-containing protein 22	CCDC22	70.755	627	16.2712	16.3344	16.2267	16.1656	16.0726	16.3031	16.0351	16.1768	16.3005	16.2875	16.3112	16.2881	16.3381	16.1992	16.2174	16.395	16.3043	16.5386	16.4043	16.3424	16.1914	16.4268	16.1637	16.3797	16.2626	16.3239	16.5491	16.6084	16.6557	16.4481	16.4195	16.5432	16.6958	16.368	16.2436	16.2744	16.4383	16.7125	16.2936	16.4553	0.922434	0.0179915	0.903072	0.0021666
P06733	Alpha-enolase	ENO1	47.168	434	22.1038	21.8099	21.7712	22.0357	21.8211	22.2475	21.784	22.0403	21.3717	21.2812	21.1109	21.6255	21.7369	21.6659	21.5509	21.3754	21.3614	21.8211	21.2932	21.603	21.3992	21.4742	21.6971	21.4457	21.2519	21.4457	21.2479	21.5868	21.4953	21.5232	21.5077	21.3532	21.5236	21.4742	20.8937	21.3914	21.4153	21.5175	21.505	21.1429	1.24162	0.0180077	1.19413	0.00244695
P10909	Clusterin	CLU	52.494	449	19.771	19.019	19.9736	19.4687	19.5671	19.1263	19.4709	19.2194	19.7203	19.9947	22.1066	20.6006	19.9585	20.6158	19.9619	19.0384	19.6029	19.9051	22.0447	20.1298	19.6781	19.7687	19.6628	20.003	20.1571	19.7076	20.0008	19.51	19.7286	20.3009	19.3723	19.7401	19.6356	19.4141	19.3377	20.0946	19.9401	20.2998	19.4134	19.8196	0.549685	0.0181557	1.13723	0.361446
P20774	Mimecan	OGN	33.922	298	18.7425	18.8359	19.6747	19.2672	19.0428	18.875	18.753	18.8344	19.0022	19.693	19.9598	18.9954	20.332	19.2978	19.501	19.195	19.3035	19.0744	20.2921	19.744	20.0685	20.2289	19.5433	20.0065	20.4451	19.6831	19.7756	20.0979	20.3542	20.5658	19.5401	19.9546	20.3027	20.0281	19.468	20.0635	19.7628	20.2077	19.5464	19.7013	0.708357	0.0182522	0.638863	1.74029e-05
Q16851	UTP--glucose-1-phosphate uridylyltransferase	UGP2	56.94	508	19.4747	19.4104	19.8888	19.4324	19.7891	19.3855	19.4155	19.5255	19.8278	19.8062	20.1277	19.891	19.7631	19.8694	19.7655	19.37	19.863	19.9647	20.0456	19.7018	19.6149	19.6194	20.1058	19.812	19.9566	19.9566	20.3627	19.8933	19.8331	20.1601	19.8463	19.9532	19.7891	19.6293	20.6785	20.0134	20.1163	19.6942	19.7633	20.2204	0.846395	0.0183528	0.84965	0.00561694
Q16570	Atypical chemokine receptor 1	ACKR1	35.552	336	13.5819	14.0883	14.8382	14.0095	13.8322	13.8805	13.7104	14.0956	14.2749	14.6301	14.9377	14.1362	15.5808	15.1742	13.9006	14.2619	14.9056	13.9382	15.1576	14.7038	15.8897	15.2941	14.7646	15.6823	15.7061	15.5054	15.2378	15.455	15.2895	15.9422	15.1565	15.4316	15.3634	15.8821	14.7042	15.5844	15.3327	15.4033	15.498	15.4732	0.67105	0.0183674	0.483668	1.37467e-08
Q96J01	THO complex subunit 3	THOC3	38.771	351	18.1738	18.3644	17.8461	17.7702	17.8769	18.3568	18.3121	17.9344	17.8933	17.6441	17.3844	18.0472	17.7852	17.2451	17.7293	18.1464	17.6498	17.8951	17.3655	17.6872	17.5122	18.2459	18.0851	17.8465	17.6109	17.6843	17.9238	17.8103	17.805	17.231	17.6533	17.578	17.9298	17.5917	17.9503	17.4831	17.6269	17.7589	18.1133	17.4672	1.25152	0.0184751	1.07921	0.232167
P15104	Glutamine synthetase	GLUL	42.064	373	17.6788	17.9853	17.3454	17.8663	18.6351	17.4818	17.5294	18.8935	17.9042	17.5736	17.6517	16.9603	17.5394	17.4891	16.9596	17.9162	17.4551	17.1513	17.4433	17.4979	17.0921	17.5953	17.4492	17.4316	17.6804	17.3386	17.4265	17.2873	17.3173	17.6349	17.3973	17.8412	18.5406	17.806	17.4791	17.7583	17.3695	17.854	17.4334	17.4774	1.39758	0.0185036	1.06244	0.494067
P61764	Syntaxin-binding protein 1	STXBP1	67.568	594	14.5658	14.0936	14.2018	14.3035	14.0379	13.833	14.5399	14.5834	14.5439	14.7824	15.0579	14.5453	14.5362	14.8354	14.3856	14.7972	14.9075	14.3421	14.6399	14.5516	14.2407	14.4331	14.4711	14.356	14.6981	14.4367	14.2133	14.3115	14.6784	14.7314	14.348	14.3236	13.9193	14.5362	14.8497	14.6947	14.8263	14.2844	14.0678	14.1782	0.805877	0.0185416	1.05282	0.410383
Q9H307	Pinin	PNN	81.627	717	17.485	17.8499	17.0476	17.1245	17.2706	17.9937	17.497	17.5105	17.771	16.8519	16.8606	17.1916	17.0213	16.6258	17.191	17.5951	17.1043	17.2639	16.771	17.0162	17.1223	16.9956	16.8614	16.9801	16.7622	17.1335	16.9578	17.0231	17.1517	16.705	17.3672	16.9991	16.7842	17.2075	17.6181	17.0515	17.005	16.5338	17.2309	17.1143	1.29783	0.0185944	1.16628	0.0305008
Q14156	Protein EFR3 homolog A	EFR3A	92.923	821	16.2643	16.2784	16.2169	16.2575	16.297	16.311	16.235	16.4038	16.2614	16.4817	16.1338	16.4176	16.0267	16.035	16.173	15.998	16.1709	16.3528	16.2921	15.9756	16.0707	16.7663	16.3079	16.037	16.016	16.0571	16.0785	16.006	16.1325	16.1592	16.0786	16.0315	16.2077	16.1043	15.7424	15.9719	16.1886	16.2186	15.9916	16.2833	1.10432	0.0186071	1.07672	0.0559018
P02647	Apolipoprotein A-I	APOA1	30.777	267	20.035	19.9036	21.4226	20.5685	20.4121	20.5078	20.3024	20.1504	20.4028	20.8975	20.8173	20.8275	21.2238	21.1952	20.8636	20.3524	20.688	20.847	20.9221	21.0059	21.3571	21.2947	21.1235	21.7177	21.3814	21.1098	20.6203	21.4639	21.6066	21.7815	21.0758	21.646	21.2809	20.7916	20.4874	21.1594	21.0507	22.2415	20.5962	20.7065	0.750535	0.0186361	0.679547	0.000209481
Q99961	Endophilin-A2	SH3GL1	41.489	368	17.459	16.7795	17.5933	17.9961	16.8245	16.9467	17.1934	17.0536	17.5456	16.4939	16.3817	16.6659	16.911	16.7297	16.7638	17.1555	16.8205	16.981	16.6694	16.7013	17.1243	16.934	16.8644	16.8205	16.4548	16.6904	16.3687	17.0896	17.0822	16.4593	16.9184	16.6971	17.0559	17.0323	16.3895	16.6766	16.7248	16.9765	17.2517	16.2138	1.32923	0.0186386	1.14237	0.0939097
Q9UMS6	Synaptopodin-2	SYNPO2	117.51	1093	16.1653	16.4582	16.551	16.6089	16.4128	16.4432	16.5065	16.401	16.2855	16.8411	16.9925	16.4128	16.7076	17.6338	16.5882	16.6671	18.4163	16.4912	17.9209	16.6758	17.2595	17.1675	16.7027	17.0913	18.2282	16.6174	18.328	17.5028	17.1546	17.4016	17.0561	17.1491	16.9197	17.4198	18.8526	16.6936	16.5165	17.1344	16.7749	17.7468	0.667449	0.0189347	0.694061	0.00769425
P51648	Fatty aldehyde dehydrogenase	ALDH3A2	54.847	485	19.2515	19.189	19.3798	19.4548	19.4548	19.1281	19.3199	19.1177	19.2256	18.8663	18.9062	19.0066	18.9812	18.9948	19.1301	19.3391	18.9215	19.1758	19.0543	19.075	19.2143	19.6235	19.428	19.3625	18.9897	18.9052	19.6274	19.391	19.1846	19.2043	19.2801	19.2562	19.0735	19.3404	19.3798	19.1797	18.9938	19.3283	19.4766	19.45	1.13311	0.0190321	0.910146	0.0281225
P07858	Cathepsin B	CTSB	37.821	339	18.4885	19.2619	18.2496	18.6374	18.5645	18.164	18.9384	19.083	18.4519	18.5553	18.2076	18.1294	18.0657	18.2325	18.1114	18.4893	18.6123	18.4931	18.1229	18.5763	18.4046	18.5074	18.3136	18.158	18.2024	18.2881	18.3098	18.1208	18.1556	18.139	18.7283	18.2814	18.2579	18.937	17.9098	18.5527	19.2236	18.2259	18.016	18.2259	1.26173	0.0192826	1.08965	0.232735
Q9BSW2	EF-hand calcium-binding domain-containing protein 4B	CRACR2A	83.192	731	12.6802	12.4501	12.4313	12.6016	12.1462	12.311	12.3954	12.6552	13.0278	13.944	13.5602	13.4907	13.0736	13.0921	13.014	13.2018	12.685	12.9518	13.1305	13.0648	12.5004	12.5365	12.5676	12.7907	13.228	13.1507	12.476	13.0482	12.9783	12.7243	12.5268	13.4423	12.9445	12.1416	12.9597	13.2876	12.9426	13.2018	12.7529	12.9082	0.725888	0.0192991	1.02807	0.753193
P50570	Dynamin-2	DNM2	98.063	870	18.3909	18.3812	18.3558	18.4132	18.5554	18.5425	18.4905	18.1727	18.3363	18.4916	18.5041	18.4477	18.5229	18.6615	18.6311	18.4549	18.5315	18.4105	18.5228	18.5717	18.2685	18.6681	18.5057	18.3869	18.456	18.7085	18.4741	18.6343	18.7873	18.8029	18.4701	18.5475	18.8624	18.4405	18.5433	18.3221	18.5186	19.1378	18.3987	18.3467	0.924744	0.0194504	0.936552	0.087056
O95456	Proteasome assembly chaperone 1	PSMG1	32.854	288	14.4115	14.8979	14.3676	14.3044	14.2475	14.6022	14.4581	14.3043	14.5807	14.471	14.1799	14.2433	14.2672	13.841	14.2221	14.7549	14.0882	14.3245	14.0407	14.2265	14.1384	14.1687	14.5137	14.2264	14.284	14.2694	13.7815	14.0919	14.1327	14.5979	14.3191	14.431	14.0641	14.3483	14.5796	14.6394	14.2428	14.9739	14.3983	14.1539	1.18563	0.0194851	1.01672	0.765201
P21810	Biglycan	BGN	41.654	368	20.3448	20.1808	20.9802	20.4425	20.2558	20.2137	20.3184	20.7492	20.2964	20.985	21.8128	20.6435	22.04	20.7247	20.6435	20.3453	20.7746	20.5183	22.0096	21.0746	20.6603	20.8779	20.6163	20.8825	21.6516	20.6726	20.6026	20.8854	21.0308	21.3443	20.6762	20.7171	21.175	20.5385	20.3577	21.3972	20.9263	20.9538	20.4014	20.694	0.668042	0.0195771	0.942538	0.570916
Q9UFC0	Leucine-rich repeat and WD repeat-containing protein 1	LRWD1	70.86	647	14.0078	13.9162	14.2727	14.04	13.9819	14.4453	14.0147	14.1311	14.0821	14.3621	14.811	14.1909	14.2752	14.3997	14.774	14.3827	14.4844	13.6976	14.5947	14.6488	14.4431	14.0106	14.1569	14.4453	14.728	14.7213	14.2662	14.8201	14.6118	15.2137	14.6562	14.6231	14.6255	14.35	14.7295	14.3987	14.4544	14.918	14.4327	14.3481	0.811967	0.0197487	0.828157	0.00481896
A0JLT2	Mediator of RNA polymerase II transcription subunit 19	MED19	26.273	244	16.5813	16.4596	16.2048	17.1538	16.8665	16.3775	16.4179	16.3018	16.4991	16.0689	16.1262	15.8318	16.3954	15.9328	15.6302	16.5887	16.1406	15.9766	16.5329	16.212	16.2593	16.2708	16.1602	16.1561	15.9151	16.2341	15.8988	16.4935	16.49	16.8727	16.3327	16.2284	16.6104	16.3342	17.8778	15.8454	16.102	17.4438	16.445	16.0839	1.28024	0.0199794	0.940954	0.525982
P31948	Stress-induced-phosphoprotein 1	STIP1	62.639	543	20.5303	20.5616	20.2358	21.0683	20.576	20.2125	20.1959	20.3304	20.5058	19.9645	19.9813	20.4033	20.0188	20.0953	20.1757	20.2671	20.1638	20.0939	20.1026	20.2342	20.1041	20.0623	20.3072	20.0939	20.0674	20.0651	19.8264	20.1905	20.1034	20.038	20.1241	20.0385	20.1915	20.0479	19.719	19.9938	20.0862	20.2052	20.177	19.9597	1.20121	0.0200098	1.16136	0.00220169
P04040	Catalase	CAT	59.755	527	19.0182	18.9549	19.9097	19.5055	19.9773	19.5264	19.1839	19.7008	19.5459	19.9485	20.4857	19.7153	19.6135	20.9065	20.5232	19.3201	20.3012	19.3691	20.3439	19.9785	19.8246	19.975	19.9235	19.8465	20.0708	20.0965	19.5768	20.0631	19.8499	21.2631	19.7293	20.3101	20.7677	20.1226	19.6525	19.6461	19.9057	21.9144	19.6013	20.3708	0.693229	0.0200321	0.793274	0.0657032
Q96FQ6	Protein S100-A16	S100A16	11.801	103	18.1435	18.6142	17.3912	18.5203	17.8402	17.8548	16.8328	17.8539	18.3983	16.4681	16.4015	17.649	17.5168	16.5024	16.3382	17.9297	17.1109	17.4524	16.932	16.821	17.2709	17.9945	17.1731	17.6532	16.7008	16.5401	16.86	18.2747	18.0789	16.6815	17.1225	17.0074	16.6544	17.6051	16.6951	16.5777	16.6212	17.4708	18.4369	16.841	1.65441	0.0204449	1.16116	0.31507
P46777	60S ribosomal protein L5	RPL5	34.362	297	19.5697	19.2168	19.4623	19.4885	19.5231	19.3162	19.4347	19.1883	19.2007	19.3408	18.97	19.2933	19.0211	19.4297	19.3384	19.4379	18.9684	19.2409	18.8869	19.1751	19.2325	19.3452	19.5669	19.1515	18.9333	19.4737	19.1414	18.9907	18.982	18.6771	19.0125	18.9846	19.1314	19.0573	18.8377	19.0807	19.2949	18.5787	19.3063	19.4031	1.14706	0.0207961	1.122	0.0260044
Q9NQC7	Ubiquitin carboxyl-terminal hydrolase CYLD	CYLD	107.31	956	16.9686	16.73	16.3846	17.0243	17.6798	16.6068	17.0458	16.6894	16.1167	16.0139	15.7954	16.2492	16.7499	16.1228	16.5697	16.4058	16.0452	16.4181	16.3192	16.0619	15.7787	16.3124	16.3469	16.151	16.0554	16.1006	16.2163	16.3841	16.1614	15.8981	16.2995	16.4107	16.1819	15.8873	15.7854	15.9871	15.8534	16.5211	16.5322	15.8771	1.36819	0.0209242	1.28593	0.00305968
Q00722	1-phosphatidylinositol 4,5-bisphosphate phosphodiesterase beta-2	PLCB2	134.02	1185	16.2976	16.2394	16.5972	16.2598	16.6885	15.9538	16.3513	16.3449	16.2678	16.2756	16.3365	16.7582	16.5525	16.6539	16.8762	16.328	16.7733	16.1504	16.5445	16.8137	16.6111	16.4954	16.6252	16.8408	16.5847	16.6743	16.1995	16.9649	16.8574	17.1041	16.3268	16.5672	16.6624	16.2831	18.0485	16.8164	17.1728	17.1867	16.5133	16.4579	0.840238	0.0211196	0.814236	0.0094683
P35749	Myosin-11	MYH11	227.34	1972	20.3407	20.1584	20.6581	20.6198	20.6323	20.5022	20.5254	20.6105	20.9535	22.0505	22.4692	21.0396	21.3148	20.8744	20.7243	20.8188	21.7505	20.8461	22.3184	21.418	21.0281	21.6773	20.7107	22.3184	22.9482	21.1642	20.7899	21.142	22.0505	22.4524	21.2977	21.7756	21.7756	21.954	20.9468	21.5697	21.3065	21.2784	20.8853	21.047	0.63628	0.0211856	0.719645	0.0224297
Q8WZA0	Protein LZIC	LZIC	21.494	190	16.9944	17.1425	17.0979	17.2961	17.1669	17.2635	17.1067	17.2698	16.8641	17.1298	16.8977	17.2327	16.8289	16.2278	16.8782	16.9613	16.894	17.1512	16.9812	16.9021	17.0352	16.9482	17.119	16.8462	16.8304	16.9399	16.7561	16.781	16.9644	16.9461	16.9921	16.9805	16.7849	17.0373	17.0448	16.8518	16.8208	16.5334	16.9583	16.6833	1.17909	0.0212472	1.08798	0.0570597
Q6P531	Gamma-glutamyltransferase 6	GGT6	50.509	493	12.8105	12.7797	12.9966	13.231	13.2773	12.5459	12.6356	13.1122	13.0442	12.8071	13.0683	13.3602	12.9441	13.2018	13.111	13.0649	13.2442	13.4953	12.9701	13.1754	13.0683	12.9152	13.0047	12.7524	12.8819	12.9316	13.1241	13.5217	13.442	13.2748	12.972	13.522	12.9532	12.8962	13.1571	12.8221	12.9316	13.4352	12.5641	13.3898	0.847025	0.0212994	0.976551	0.675712
P12821	Angiotensin-converting enzyme	ACE	149.71	1306	16.9407	17.2564	17.3997	17.1745	17.1258	17.0447	17.2554	17.2363	17.1917	17.6206	17.5912	17.3857	17.351	17.3192	17.5011	17.2275	17.5157	17.141	17.6352	17.567	18.0066	18.0827	17.4213	17.9617	17.5339	17.7875	17.7058	17.5926	17.6188	18.1273	17.7031	17.9165	17.9301	17.835	17.4502	17.5407	17.8182	17.6673	17.4508	17.6803	0.871217	0.0213052	0.748717	1.73538e-07
P05997	Collagen alpha-2(V) chain	COL5A2	144.91	1499	16.8348	15.844	16.3229	16.6856	16.1977	16.7219	16.3092	16.3703	15.9435	16.7649	17.447	16.8672	16.2162	17.3933	16.8776	16.5676	17.1648	16.7747	16.479	16.48	16.6199	16.2515	16.5344	16.1851	15.8918	16.3758	17.3689	16.4628	16.0075	16.3125	16.3278	15.9975	16.0492	16.3001	16.3519	15.5826	16.4909	16.3047	16.1639	15.6115	0.743673	0.0214366	1.27774	0.00901299
P52272	Heterogeneous nuclear ribonucleoprotein M	HNRNPM	77.515	730	20.1044	20.2051	19.6404	19.7718	19.9193	20.1214	20.1423	19.8858	20.2193	19.9208	19.5549	19.7408	19.9785	19.7209	19.8342	20.1776	19.6211	19.8583	19.5328	19.6937	20.1587	19.768	19.4881	19.5262	19.4037	20.2434	19.3916	19.6566	19.7325	19.6198	19.9668	19.7949	19.897	19.9107	19.4414	19.645	19.6973	19.7718	19.7603	19.5048	1.16615	0.0214928	1.11981	0.0300946
Q96AQ6	Pre-B-cell leukemia transcription factor-interacting protein 1	PBXIP1	80.642	731	17.1551	17.1486	17.6393	17.2367	17.3672	17.0752	17.4012	17.6998	17.408	17.1637	17.6208	17.3708	17.7017	17.8487	17.4839	17.3982	18.5401	17.5876	17.7042	17.3173	17.0687	17.6662	17.6971	17.4853	17.6503	17.4044	18.2864	17.3736	17.2288	17.4644	17.2054	17.5677	17.472	17.4052	18.7952	17.515	17.6663	17.6925	17.1412	18.6904	0.796722	0.0216793	0.913572	0.3116
P61289	Proteasome activator complex subunit 3	PSME3	29.506	254	17.0979	17.3587	17.1722	16.5373	17.1339	17.1273	17.4475	17.1874	17.2389	16.7311	16.8325	17.1101	16.64	16.5767	17.1758	16.6652	16.5111	17.0525	16.5984	16.9506	16.8104	17.0343	17.4817	17.2382	16.979	16.8191	16.5945	16.7342	16.775	16.7636	17.192	16.9176	16.5655	17.0384	16.4195	17.0627	16.9473	17.0768	17.2493	16.4288	1.22426	0.0217765	1.03587	0.57914
P13693	Translationally-controlled tumor protein	TPT1	19.595	172	18.5106	18.7866	18.173	18.7317	18.6607	18.4834	18.3669	18.6229	18.8847	18.1764	18.174	18.5145	18.0575	18.1901	18.4864	18.5378	18.3336	18.2084	18.0758	18.404	18.3463	18.2688	18.0776	18.0337	18.0213	18.4085	18.102	18.1514	18.1487	17.6629	18.204	18.2185	18.2947	18.2157	17.8539	18.0308	18.3076	18.013	18.1603	18.0688	1.18221	0.0218729	1.22223	0.000103656
Q8NEB9	Phosphatidylinositol 3-kinase catalytic subunit type 3	PIK3C3	101.55	887	17.9952	17.8266	18.0687	17.7867	17.9425	17.7772	17.8661	18.0305	17.9987	17.8621	17.908	18.0654	17.9833	18.099	17.9833	17.9571	18.1395	17.9282	18.0748	18.3582	17.8931	17.9071	18.1254	18.2919	18.1001	17.9005	17.8683	18.2152	18.1021	17.9384	17.8156	17.9656	18.2786	17.8983	18.4941	18.1092	18.368	18.16	18.0169	17.8576	0.911137	0.0220394	0.944254	0.122456
Q8N9N2	Activating signal cointegrator 1 complex subunit 1	ASCC1	45.509	400	13.7852	12.8629	12.5764	13.5207	13.2378	13.2045	12.8348	13.1639	13.5503	12.8423	12.4518	12.8271	12.16	12.4917	12.833	13.2889	12.5863	13.3115	12.6849	12.7918	12.8209	12.7597	12.5241	12.5863	12.7583	12.9734	12.5479	12.6401	12.6616	12.7217	12.9718	12.3617	12.4421	12.6766	12.1713	12.8482	12.8137	12.1236	12.6688	12.6552	1.33346	0.022052	1.2431	0.00552419
Q9Y285	Phenylalanine--tRNA ligase alpha subunit	FARSA	57.563	508	17.934	17.6048	17.4614	17.369	17.124	18.0546	17.5193	17.5553	17.9208	17.7213	17.675	17.4757	17.1921	17.4792	17.0926	17.2448	17.3858	17.4571	17.2356	17.384	17.6943	17.4722	17.0626	17.4417	17.5812	18.0637	17.275	17.3242	17.3891	17.2175	17.6965	17.4317	17.2969	17.6029	17.3676	17.5453	17.5168	17.2205	17.6979	17.2161	1.20103	0.0221211	1.02715	0.626352
P51572	B-cell receptor-associated protein 31	BCAP31	27.991	246	18.4089	18.4704	18.4379	18.6088	18.834	18.595	18.4005	18.5538	18.7167	18.3805	18.3529	18.3056	18.1455	18.5216	18.772	18.3751	18.2799	18.328	18.2082	18.2806	18.3306	18.3623	18.6387	18.2738	18.0964	18.1954	18.0726	18.3278	18.3315	18.1265	18.3708	18.2996	18.2806	18.4286	17.9002	18.1576	18.4467	18.0507	18.3461	18.1302	1.13581	0.0221593	1.14114	0.00159125
Q8TAA9	Vang-like protein 1	VANGL1	59.974	524	16.2645	16.7779	16.4704	16.33	16.9394	16.9436	17.0532	16.5935	16.8693	16.2531	15.7765	16.5675	16.4351	15.6337	16.6531	16.4679	16.0604	16.2753	16.4911	16.4744	16.5164	16.1609	16.7454	16.1232	15.8923	16.1864	15.4368	16.0344	16.2694	15.8194	16.6052	15.9007	16.4642	16.1787	16.8884	16.1149	16.6306	15.6129	16.1149	15.5804	1.28875	0.0221648	1.23347	0.0166834
P36957	Dihydrolipoyllysine-residue succinyltransferase component of 2-oxoglutarate dehydrogenase complex, mitochondrial	DLST	48.755	453	17.8287	17.8985	18.0515	17.6699	17.5828	17.8837	17.9045	17.8229	17.8691	18.1714	18.625	18.0822	17.9711	17.8172	17.9904	17.785	18.2426	17.9898	18.4281	18.247	18.1535	17.9701	18.1933	18.4106	18.3108	18.1305	18.707	18.4695	18.456	18.3278	18.2456	18.2001	18.0245	18.2549	18.6486	18.4216	18.211	18.3019	18.2467	18.2579	0.841158	0.0221718	0.809994	9.58031e-05
Q96HC4	PDZ and LIM domain protein 5	PDLIM5	63.944	596	18.7834	18.149	18.6146	18.7779	18.4835	18.9232	18.7091	18.6743	18.4998	18.4628	18.496	19.0913	18.6945	19.5135	19.1495	18.8274	19.4987	18.8637	18.7271	18.5593	18.8715	18.5131	18.6301	18.7027	18.7379	18.6115	19.7204	19.0223	18.8791	18.7791	18.4857	18.5448	18.5732	18.5583	19.8392	18.3255	18.3542	18.7886	18.832	19.889	0.793145	0.0221936	0.960607	0.651851
P05141	ADP/ATP translocase 2	SLC25A5	32.852	298	17.0841	17.6597	16.406	16.6341	17.0436	17.841	17.3863	17.3871	16.6402	16.3972	16.7247	16.5287	16.6886	16.0582	16.7097	16.9529	16.5184	16.6858	16.1921	16.796	16.5233	16.8328	16.4348	17.0006	16.8725	16.5564	17.2553	16.6389	16.9099	16.3878	16.8633	16.5866	17.0851	17.1722	17.0971	17.4023	16.6299	16.2602	17.2347	17.4392	1.37785	0.0223701	0.971029	0.746574
Q15428	Splicing factor 3A subunit 2	SF3A2	49.255	464	17.5314	17.7096	17.5059	17.2729	17.4002	17.5474	17.7793	17.7898	17.1216	17.4887	17.0445	17.0727	17.6559	17.4467	17.2037	17.4317	17.1811	17.2068	17.202	17.4234	17.1187	17.3091	17.4189	17.4246	17.4443	17.2641	17.0894	17.3832	17.3998	16.9243	17.3241	17.1041	16.7882	17.6043	17.0768	17.5422	17.0259	17.1821	17.5896	16.8168	1.17107	0.0224749	1.11668	0.0402778
P00739	Haptoglobin-related protein	HPR	39.029	348	15.781	15.3759	15.9279	15.6418	15.5075	15.5137	15.4308	15.5395	15.5678	16.1804	16.2386	15.83	16.0869	16.483	15.9425	15.405	15.7631	15.7327	16.4564	15.8491	17.0095	16.0336	15.5389	16.7241	17.136	16.0235	16.5326	16.8827	16.6988	16.3477	16.1193	16.4087	16.4863	16.3401	15.8423	16.5357	15.9422	16.4391	16.6348	15.8333	0.794389	0.0225631	0.677002	3.70683e-05
P49902	Cytosolic purine 5-nucleotidase	NT5C2	64.969	561	18.0871	17.5254	17.7563	17.97	18.0322	18.2395	17.5525	17.6027	17.2953	18.0894	17.5888	17.1885	17.9235	17.7273	17.1569	17.5803	17.4877	17.4786	17.507	17.4807	17.4963	17.451	17.6465	17.5462	17.4475	17.4055	17.4136	17.7597	17.7135	17.2276	17.4576	17.3812	17.4835	17.5026	17.4781	17.496	17.3387	17.3911	17.9471	17.2165	1.23379	0.0226978	1.12778	0.0337205
P23229	Integrin alpha-6	ITGA6	126.6	1130	19.3721	18.9102	19.068	19.4015	18.9711	18.9866	19.1244	19.3125	19.2052	20.1319	19.8374	19.5011	19.2259	19.8677	19.4572	19.6723	19.168	20.1005	19.7038	19.5552	19.2346	19.1508	18.952	19.491	19.4644	19.3178	18.9852	19.1893	19.4112	19.3708	19.1955	19.531	19.212	19.2513	19.1929	19.406	19.4034	19.3102	19.0533	19.0162	0.778859	0.0227263	1.12635	0.0644788
Q2M389	WASH complex subunit 7	KIAA1033	136.4	1173	17.5306	17.5913	17.7999	17.5822	17.7677	17.6338	17.6406	17.7555	17.6637	17.6189	17.7165	17.8794	17.6695	17.8866	18.102	17.5352	17.8044	18.0249	17.7192	17.7488	17.8467	17.7814	17.8726	17.8044	17.7117	17.6928	17.6617	17.7691	17.5089	18.1714	17.7612	17.8081	17.9297	17.7008	17.5441	17.7233	17.8521	17.9884	17.7104	17.909	0.901088	0.0229418	0.963358	0.266317
P82912	28S ribosomal protein S11, mitochondrial	MRPS11	20.616	194	13.0706	13.4087	12.4936	12.6902	12.4707	12.979	12.9697	13.1015	12.4921	12.8927	12.6837	12.2528	12.7099	11.3001	11.2783	12.979	12.7005	12.2122	12.7665	12.3872	12.7169	12.6837	12.2013	12.2001	12.1235	12.4707	13.2016	12.5646	12.6401	11.4429	13.1341	12.6363	12.5059	12.899	13.1828	12.9173	12.612	12.1235	13.1612	12.0515	1.44378	0.0229764	1.0129	0.907174
A0A0C4DH24		IGKV6-21	12.43	114	14.9389	14.7368	16.4526	15.3293	15.838	15.3668	15.1548	15.0906	15.456	15.4572	16.1878	15.6084	15.7041	16.6572	15.8346	15.1775	16.1402	15.3722	17.2171	16.0158	15.6515	15.2671	16.8517	15.7159	15.6386	15.782	16.4894	15.9162	15.9771	15.4352	15.9224	15.8457	15.8508	16.2	14.9856	15.1245	16.5707	16.2623	16.7007	16.459	0.655475	0.0231436	0.843501	0.18177
P35527	Keratin, type I cytoskeletal 9	KRT9	62.064	623	20.9196	20.3526	21.2777	20.3085	21.0021	20.5041	20.2291	20.1699	20.4828	20.5576	21.2216	21.3556	20.8652	21.6219	21.53	20.0959	20.5173	22.3509	21.091	20.8574	21.68	24.1296	21.1174	21.1935	20.9233	21.1255	21.7318	20.4999	20.31	21.2584	21.2083	21.2915	22.2567	21.1174	20.8422	20.9773	20.7359	23.1693	20.9443	21.1476	0.673498	0.0231584	0.698606	0.0364969
Q99848	Probable rRNA-processing protein EBP2	EBNA1BP2	34.852	306	15.8345	15.9156	15.3841	15.7812	16.1795	15.9971	15.953	16.4162	16.3417	15.5434	15.1073	15.6826	15.199	15.1336	15.4581	15.7248	16.1193	16.0044	15.2556	15.7997	15.1788	15.3771	15.4705	15.6863	15.4068	15.7798	15.237	15.8375	15.875	15.5777	15.5424	15.3812	15.376	15.4174	16.5002	15.477	15.4742	15.5028	15.9473	15.1324	1.30693	0.0232058	1.13498	0.112461
P16452	Erythrocyte membrane protein band 4.2	EPB42	77.008	691	16.2708	15.8959	16.2403	16.4396	16.9203	16.4797	16.1559	16.2033	16.2619	16.4678	16.9571	16.4732	16.7474	16.6889	16.7353	16.0685	17.3317	16.4231	16.8633	16.474	16.8681	16.6821	16.3147	16.7287	16.9986	17.0168	16.8174	16.9573	16.6777	17.8092	16.4583	17.4694	17.4075	16.7509	17.3933	16.1908	16.3967	17.6778	16.5948	17.7676	0.788556	0.023311	0.7351	0.00205411
Q16186	Proteasomal ubiquitin receptor ADRM1	ADRM1	42.153	407	17.1132	17.454	17.209	17.0969	16.9965	17.3854	17.1812	16.889	16.7851	16.7119	16.6265	16.9192	16.9555	16.7742	16.8098	17.2849	16.7682	16.9088	16.4971	16.761	16.4458	17.1887	17.5035	16.8647	16.8399	16.1625	16.933	16.7269	16.7472	16.9141	16.7105	16.6577	16.4165	16.9125	16.672	17.0969	16.6569	16.1084	17.1713	16.73	1.1906	0.0233554	1.13557	0.0594883
A0AVF1	Intraflagellar transport protein 56	TTC26	64.177	554	11.235	11.5352	12.086	11.6024	11.5297	11.765	11.6793	11.779	12.0183	12.0501	12.086	12.0089	11.7868	12.4441	11.9925	11.4602	12.2081	12.0525	12.3751	11.9296	11.9189	11.8789	12.1021	12.506	12.5147	12.255	13.0858	12.4984	12.0107	12.5251	12.0676	12.2219	12.7487	12.3238	12.8318	12.4506	12.0525	12.8823	12.1141	12.8338	0.808664	0.0235005	0.702259	2.16786e-05
O75348	V-type proton ATPase subunit G 1	ATP6V1G1	13.757	118	16.8689	16.636	16.9908	16.5048	17.2208	16.5831	16.6684	16.5695	16.8903	16.5416	16.1545	16.45	16.5913	16.9526	15.9962	16.9738	16.3495	16.3824	16.0592	16.3646	15.6798	16.5813	17.1934	16.2277	16.0812	15.7154	16.2928	16.0742	16.5887	15.6318	15.9934	16.219	16.2421	16.128	15.9264	16.5162	16.2564	15.6433	16.4235	15.7936	1.24834	0.0235772	1.34444	0.000565486
Q8IY18	Structural maintenance of chromosomes protein 5	SMC5	128.81	1101	13.2617	13.5047	13.2401	13.2885	13.0365	13.229	13.5196	13.6046	13.2186	13.5016	13.6107	13.5641	13.5548	13.6699	13.6735	13.4071	13.6616	13.4907	13.2127	13.3935	13.8063	13.2901	12.9953	13.878	13.3872	13.5471	13.9883	13.3595	13.2538	13.1108	13.5966	13.5503	13.2262	13.3933	13.9422	13.4071	13.7744	13.6616	13.6527	14.1534	0.880639	0.0235833	0.922409	0.158226
P62906	60S ribosomal protein L10a	RPL10A	24.831	217	19.5118	19.3749	19.5092	19.5263	19.3436	19.4916	19.5071	19.3409	19.3472	19.445	19.2748	19.326	19.1395	18.6541	19.3219	19.581	19.0498	19.4553	18.9579	19.4138	19.4755	19.3239	19.4351	19.2049	19.0117	19.5449	18.8324	19.2238	19.1631	18.8299	19.3402	19.1502	19.3192	19.43	18.8681	19.1276	19.3218	18.9912	19.4365	18.7956	1.16665	0.0236827	1.09986	0.0680882
Q16718	NADH dehydrogenase [ubiquinone] 1 alpha subcomplex subunit 5	NDUFA5	13.459	116	17.6865	17.8071	18.2987	17.932	17.5193	17.9512	17.9046	17.977	17.9551	18.229	18.3605	18.1123	18.0031	18.0259	18.1189	18.3176	18.4769	17.7775	18.5339	18.0974	18.2951	18.3477	18.4285	18.2444	18.2878	18.3372	19.2603	18.1412	18.0021	18.0335	18.2662	18.4702	18.0036	18.2718	19.2996	18.6103	18.3505	18.0828	18.1622	18.7419	0.837186	0.0237178	0.796853	0.00217908
P61088	Ubiquitin-conjugating enzyme E2 N	UBE2N	17.138	152	18.6948	18.4904	18.3097	18.7339	18.1703	18.4343	18.2299	18.2952	17.6805	18.1879	17.7689	17.9655	18.2803	18.1149	17.5651	18.4819	17.9396	18.2307	17.6797	17.9698	17.8389	17.8603	18.3325	17.7279	17.9688	18.0669	17.9813	18.0527	18.1118	17.9903	17.9095	17.8731	17.8783	17.9052	17.808	17.9731	17.8358	17.6861	17.8711	17.8231	1.25098	0.0237405	1.17808	0.00556589
Q8N6T3	ADP-ribosylation factor GTPase-activating protein 1	ARFGAP1	44.667	406	17.5041	17.2621	16.2399	17.2739	17.421	16.7842	17.2922	17.3796	17.2241	16.5635	16.6844	16.7407	16.8272	16.3346	16.6066	16.7892	16.8063	17.2621	16.4565	16.6353	16.6427	17.2875	16.1918	16.2869	16.3918	16.9733	16.3771	16.4348	16.4079	16.6875	16.8407	16.8908	16.7211	16.3998	16.1992	16.6037	16.7337	16.5606	16.4553	16.4265	1.30151	0.0238884	1.25593	0.00380219
Q96F85	CB1 cannabinoid receptor-interacting protein 1	CNRIP1	18.648	164	15.6162	15.8203	16.072	15.5054	15.7053	15.619	15.8447	15.8522	15.8863	16.5331	16.7287	15.7883	17.0626	16.5352	15.7548	15.7801	16.6802	15.7427	16.7383	16.1991	16.5158	16.517	16.0654	16.334	16.7335	16.5284	17.3477	15.9449	15.959	16.4179	16.5992	16.6781	16.3713	16.4946	16.0546	16.7144	17.0479	16.3582	15.9805	16.7537	0.729231	0.0239708	0.759128	0.00467571
Q15124	Phosphoglucomutase-like protein 5	PGM5	62.224	567	17.6703	17.7438	18.2299	18.1211	18.0823	18.0327	17.8404	18.0198	18.2857	18.6085	18.9697	18.1071	18.7886	18.0853	17.9946	18.0775	18.8802	18.1193	18.9025	18.5426	18.8061	18.7661	18.4414	19.2029	20.3629	18.7106	19.1292	18.8812	18.9796	19.0954	19.0558	19.057	18.7705	19.326	19.5018	18.5479	18.5736	18.8348	18.6849	19.2437	0.766679	0.0239929	0.597307	1.20938e-06
Q92918	Mitogen-activated protein kinase kinase kinase kinase 1	MAP4K1	91.295	833	14.0801	13.5756	14.7061	13.6853	14.3161	13.7953	13.8223	13.8688	14.2283	13.9759	14.504	14.0759	14.6869	15.4936	14.1811	13.8305	14.9071	14.6065	13.7528	15.3128	15.0503	14.1743	14.5857	15.3348	13.8872	13.9971	13.6374	15.3275	14.7354	14.4293	13.9688	13.9463	13.8174	14.7394	15.3602	13.6944	14.2334	14.0845	14.3493	13.7024	0.692681	0.0240831	0.944419	0.641861
P20851	C4b-binding protein beta chain	C4BPB	28.357	252	16.4183	16.0712	16.8886	16.4578	16.4755	16.1977	16.7286	16.2986	16.5913	16.1889	16.5139	17.4471	16.6985	18.1049	17.2692	16.0451	17.0214	16.8052	16.8394	16.4832	16.8602	16.5574	16.72	17.0361	16.8364	16.5362	16.7399	16.9116	16.803	16.9403	16.3978	16.4335	16.6247	16.6818	16.4547	16.4899	16.5421	17.1501	16.645	17.1945	0.711465	0.0242896	0.965571	0.685973
Q9H444	Charged multivesicular body protein 4b	CHMP4B	24.95	224	16.1049	16.056	16.3809	16.5393	16.1901	16.5026	15.7584	15.9964	16.381	15.74	16.2699	16.4706	16.1333	16.9577	16.8426	16.4227	16.843	16.8074	16.0386	16.276	15.8464	16.2682	16.821	15.9413	16.0649	15.8871	16.6033	16.2796	16.2479	16.1308	16.0152	16.1821	16.2256	16.107	17.0037	16.3256	15.9375	15.6862	16.448	16.5559	0.789371	0.0243178	1.07676	0.327682
Q9BY43	Charged multivesicular body protein 4a	CHMP4A	25.098	222	15.5761	15.2533	14.7651	15.7781	14.6771	14.8757	14.9409	15.2327	14.6831	14.6028	14.4195	14.4766	14.7117	14.5362	14.3791	15.3902	14.6464	14.899	14.3069	14.6258	14.4899	14.7978	14.5883	14.51	14.2437	14.2978	14.4063	14.748	14.5935	14.6154	14.3965	14.8591	14.8766	14.4218	15.0353	14.2905	14.4697	14.8162	14.8562	14.3905	1.31892	0.0243877	1.19222	0.0205383
Q86TU7	Histone-lysine N-methyltransferase setd3	SETD3	67.256	594	17.4781	17.2831	17.4279	17.5702	17.3815	17.7435	17.3146	17.3734	17.4573	17.4402	17.3295	17.3794	17.3336	16.9564	17.3897	17.221	17.2597	17.4163	17.4056	17.3038	17.4816	17.2536	17.3615	17.247	17.2143	17.4788	17.4924	17.3542	17.4445	17.0847	17.3683	17.3344	17.4972	17.3344	17.284	17.2623	17.4204	17.2689	17.2724	17.4486	1.10763	0.0246614	1.01964	0.50729
P03952	Plasma kallikrein	KLKB1	71.369	638	17.2742	17.0295	17.8464	17.3217	17.3449	17.2635	17.5403	17.3094	17.4664	17.6419	18.046	17.4104	17.909	17.9957	17.6878	17.1185	18.0016	17.3843	17.8385	17.6528	18.4637	17.7027	17.6223	18.4454	18.2163	17.7856	18.0097	18.1814	17.9124	17.9625	17.8917	17.6289	17.6965	17.9967	18.0969	18.024	18.0261	17.9099	17.8673	18.3258	0.811903	0.024772	0.740129	1.74515e-05
Q9BY42	Protein RTF2 homolog	RTFDC1	33.886	306	15.0843	15.4883	14.9335	15.2271	15.1663	15.4241	14.8354	14.8104	15.3905	14.6882	14.7084	14.7926	15.0471	14.7809	15.0012	14.94	14.6815	15.0225	14.6426	14.9568	14.7689	15.0653	14.8459	14.7113	14.5302	15.0306	14.6352	15.1195	14.9685	14.6903	14.9474	14.7874	14.6312	15.3378	14.3148	14.5654	14.6447	14.7746	15.122	14.6396	1.1871	0.025005	1.12862	0.0338236
Q01844	RNA-binding protein EWS	EWSR1	68.477	656	18.739	18.7996	18.7049	18.409	18.5213	18.7597	18.5279	18.5968	19.3149	18.2303	17.9762	18.3892	18.6466	17.9569	17.8764	19.1699	18.0891	18.3045	17.6648	18.4641	18.0156	18.2396	18.9093	18.1406	18.2011	18.3396	17.9427	18.0742	18.3161	17.5115	18.5744	18.2424	18.2337	18.183	17.4406	18.6264	18.2293	17.5417	18.2825	18.2109	1.32552	0.0251789	1.22629	0.0219805
P41236	Protein phosphatase inhibitor 2	PPP1R2	23.015	205	16.7537	16.8307	16.1059	16.2206	16.1797	17.4317	16.433	16.7397	17.1283	16.4449	15.8079	16.1527	16.6911	15.4657	15.926	16.8147	16.1271	16.2745	15.9539	16.4589	16.1228	16.0263	15.7042	16.0463	16.0823	16.1187	16.1315	15.8693	16.0502	15.8107	16.3073	16.2444	15.7983	16.0307	15.8686	16.1623	15.7926	16.3317	16.2551	15.8131	1.37514	0.0252728	1.29121	0.00249443
Q06265	Exosome complex component RRP45	EXOSC9	48.948	439	17.4359	17.0684	17.2443	17.4559	17.2105	17.4053	16.9247	16.9949	16.9763	16.5846	16.5033	16.8064	17.1346	16.7167	16.6246	17.3997	16.7208	17.0008	16.6424	16.7778	16.5333	16.7574	17.2023	16.5994	16.6001	16.5233	16.2687	16.7882	16.7372	17.1214	16.4413	16.6776	16.979	16.5205	17.386	16.7774	16.5942	16.5299	16.7215	16.4954	1.22888	0.0253771	1.20471	0.00588833
P42566	Epidermal growth factor receptor substrate 15	EPS15	98.655	896	18.3477	18.2499	18.612	18.4192	18.7116	18.5872	18.5471	18.4805	18.4947	18.489	18.7484	18.6729	18.5857	18.618	18.7405	18.4041	18.7521	18.4935	18.5665	18.7412	18.8712	18.906	18.7988	18.6344	18.5677	18.9839	18.5471	18.807	19.1059	18.9004	18.7105	18.7678	18.9484	18.6478	18.8503	18.7163	19.1047	18.6071	18.5872	18.6878	0.908518	0.0254967	0.855942	5.7646e-05
P47813	Eukaryotic translation initiation factor 1A, X-chromosomal	EIF1AX	16.46	144	13.5615	13.8631	11.5295	13.1586	13.3081	13.0564	13.2581	13.0554	11.9727	13.4355	12.5157	12.5512	12.6539	12.2114	12.2114	11.7618	12.0494	12.9922	12.6927	12.3817	12.8687	12.6839	11.5617	12.1784	13.1693	13.3382	12.4885	12.6228	12.8982	12.9575	13.0864	12.7556	11.8216	12.7915	11.9098	13.0227	12.0014	12.6927	13.0494	12.5212	1.53446	0.0255531	1.06441	0.619041
P08123	Collagen alpha-2(I) chain	COL1A2	129.31	1366	19.8629	18.8572	19.2314	19.3613	18.9269	18.246	19.8443	19.419	19.1938	19.5035	20.5804	19.9873	20.4903	19.115	18.8968	19.3288	20.4904	19.2388	20.5592	20.113	18.9717	18.8718	19.3573	19.1215	19.5421	18.9824	18.7739	19.0149	18.9251	19.7706	18.8446	19.3611	19.498	18.3781	18.6393	18.8747	19.0152	19.9588	18.6641	18.822	0.643777	0.0255826	1.40733	0.00655769
P02452	Collagen alpha-1(I) chain	COL1A1	138.91	1464	19.9656	18.9631	19.2261	19.1939	19.0902	18.4375	19.1714	19.0137	18.713	19.5388	20.754	19.6948	20.1269	18.9426	19.1539	19.0843	20.1963	19.1392	20.5477	19.6213	19.1358	19.0965	19.3237	19.1672	19.4517	18.9289	19.0921	19.3448	19.1672	20.1415	19.0602	19.2334	19.295	18.7746	18.5546	18.9208	18.9058	19.7809	18.8498	19.9824	0.662152	0.0258819	1.16341	0.188797
Q9NZN4	EH domain-containing protein 2	EHD2	61.161	543	19.4371	18.9429	19.8287	19.2254	19.1942	19.1019	19.276	19.5487	19.5056	19.8743	19.9532	19.4658	20.1232	19.3045	19.6179	19.5667	19.867	19.5097	20.3964	19.6083	19.7527	20.0035	19.5937	20.0358	20.2292	19.6639	19.9306	19.7916	20.3673	20.5346	19.8051	20.079	20.522	20.1281	19.7409	19.9825	20.0825	20.2125	19.7427	19.6997	0.785793	0.0259597	0.743539	0.000151935
P13716	Delta-aminolevulinic acid dehydratase	ALAD	36.294	330	17.993	18.1818	18.0604	17.952	17.9054	17.9879	18.0035	17.9991	17.826	18.479	18.8483	18.0422	18.4802	17.9848	17.9639	18.2547	18.6314	17.9678	19.2683	18.5994	18.6248	18.7103	18.1324	18.5981	18.5589	18.5142	18.2216	18.773	18.7602	19.1898	18.5367	18.6465	18.6834	18.8946	18.6086	18.3557	18.3655	19.5606	18.4371	18.5779	0.77632	0.0261698	0.74948	0.000560753
Q96D46	60S ribosomal export protein NMD3	NMD3	57.603	503	16.6925	16.2938	16.2051	16.7326	16.5849	16.7343	16.4708	16.7727	16.4728	16.3082	16.1835	16.6807	16.2091	15.9088	16.1943	16.653	16.2178	16.253	16.0887	16.4381	16.4048	16.2892	16.1398	16.3429	16.297	16.2446	16.0782	16.054	15.993	16.1657	16.2409	16.3922	16.3896	16.3434	15.8096	16.0887	16.1742	16.202	16.2591	16.1702	1.18432	0.0261934	1.14931	0.00410535
Q3ZCM7	Tubulin beta-8 chain	TUBB8	49.775	444	19.341	19.5091	18.8081	19.1304	18.2015	19.1283	19.1824	19.354	17.3625	18.4417	17.6464	18.3351	19.0663	17.7375	17.0139	19.0334	18.028	18.8246	17.7569	17.7459	17.1901	18.4308	18.4224	18.1857	18.4283	17.2939	18.2472	18.6027	18.4685	17.5214	17.7305	17.6878	17.4266	18.3439	18.1079	18.6488	17.2963	17.9842	18.4453	17.5092	1.65529	0.0264853	1.39842	0.0211656
Q13427	Peptidyl-prolyl cis-trans isomerase G	PPIG	88.616	754	17.2039	17.282	17.0625	16.8862	17.131	17.2111	17.3701	16.8179	16.4886	16.4631	16.3423	16.9361	16.9371	16.317	16.67	17.2273	16.2999	16.8081	16.1576	16.6116	16.4188	16.661	17.0161	16.7369	16.6078	16.6295	16.789	16.5806	16.7394	16.6578	16.6357	16.5098	16.6154	16.8963	16.2785	16.8313	16.4988	16.2669	17.1061	16.8512	1.28428	0.0265824	1.10561	0.142615
Q92643	GPI-anchor transamidase	PIGK	45.251	395	15.7876	15.691	15.1146	15.0392	15.2719	16.0655	15.7103	15.4571	15.8776	15.6023	15.3278	15.2035	15.6292	14.7506	15.0938	15.4398	15.492	15.4548	14.9343	14.8592	15.5258	15.9184	15.1368	15.1852	14.9949	15.7614	15.3237	14.6688	14.6106	15.0488	15.5413	15.4311	15.5875	15.3157	15.5531	15.2094	15.6485	15.7683	15.1054	15.2301	1.26858	0.026591	1.0438	0.58223
P68104	Elongation factor 1-alpha 1	EEF1A1	50.14	462	22.7483	23.2468	21.7416	22.3415	22.4701	22.9072	22.4212	22.4961	22.4212	22.4508	22.2156	22.3025	22.0311	21.6607	22.1351	22.5629	21.7381	22.5629	21.6301	22.3809	22.3025	22.0154	21.5523	21.8625	21.9798	22.5629	21.4494	22.0745	22.136	22.136	22.5711	22.4054	22.2734	22.2734	21.3281	22.4307	22.0441	21.6301	22.3074	21.6739	1.3218	0.0266692	1.20814	0.0341038
P04632	Calpain small subunit 1	CAPNS1	28.315	268	18.0866	18.4102	18.818	18.5214	18.5391	18.4092	18.4186	18.2966	18.6447	18.6729	18.7822	18.4704	18.6081	18.4516	18.8924	18.6114	18.5201	18.9597	18.973	18.7296	18.5848	18.7623	19.0739	18.823	18.8176	18.3733	18.4264	19.0634	18.9306	18.917	18.9714	18.9032	18.669	18.8206	18.2126	18.7279	18.6491	18.6379	18.9597	18.5152	0.859683	0.0267149	0.900528	0.044726
P62280	40S ribosomal protein S11	RPS11	18.431	158	17.2757	17.766	16.792	16.8057	16.5359	17.0985	17.3735	17.2907	17.2018	17.5323	17.317	16.7423	16.9022	16.3894	16.5602	16.8983	16.5668	17.0631	16.6218	17.0481	17.0996	16.9936	16.7195	17.2113	17.1232	17.665	16.6138	16.8964	17.0827	16.2483	17.3536	16.9193	16.3697	17.5665	16.6698	17.3505	16.8367	16.3567	17.7047	16.3917	1.28012	0.0269711	1.02131	0.814214
Q96FZ2	Embryonic stem cell-specific 5-hydroxymethylcytosine-binding protein	HMCES	40.574	354	16.5635	16.9074	15.8734	16.0942	16.25	16.5971	16.3913	16.5041	16.9483	15.8914	15.9257	16.1788	16.292	15.6759	16.3763	16.1329	15.8562	15.9362	16.2527	16.0677	16.024	16.0209	15.9997	16.5472	16.112	16.5817	15.5336	16.2479	16.3256	16.1212	16.0868	15.8221	16.5028	15.9925	15.5551	15.9891	15.7835	16.7926	16.0131	15.528	1.2593	0.0270243	1.11479	0.161721
O75937	DnaJ homolog subfamily C member 8	DNAJC8	29.841	253	18.2422	18.0206	18.1273	18.0877	18.2318	18.424	17.9712	18.0142	18.0384	18.0648	18.0346	18.1387	18.0719	17.5828	18.0288	17.9596	17.7729	18.117	17.6897	18.0254	17.9836	18.0313	18.2217	17.7912	17.7234	18.1897	17.4903	18.0352	17.9213	18.3089	18.1193	18.1139	18.003	17.9961	17.4685	18.1087	18.1557	17.5777	17.9685	17.7465	1.13294	0.0271652	1.06029	0.223539
Q9Y4C8	Probable RNA-binding protein 19	RBM19	107.33	960	15.3891	15.5606	15.4114	15.3255	15.8894	15.126	15.5319	15.4922	15.4855	15.4922	15.8077	15.9612	15.8152	15.0399	16.0578	15.8051	15.7167	15.5206	15.7709	15.7991	15.9648	15.2827	15.4732	15.2596	15.1806	15.6943	15.0189	15.2762	15.036	15.0274	15.6271	15.6112	15.6184	15.5941	14.976	15.1958	15.7949	15.2608	15.2353	14.943	0.835645	0.027201	1.18624	0.00934094
Q9Y6E0	Serine/threonine-protein kinase 24	STK24	49.307	443	17.3722	17.6082	17.4163	17.7455	17.9484	17.5602	17.4745	17.5735	17.8801	17.7049	17.2606	17.7399	17.283	17.4136	17.4645	17.7484	17.1226	17.5921	17.1596	17.2296	17.531	17.412	17.4724	17.4433	17.289	17.2038	16.995	17.3276	17.4745	17.1453	17.5038	17.2757	17.3238	17.4029	16.952	17.262	17.2573	17.0307	17.5243	17.7594	1.17038	0.0272393	1.13728	0.0109491
P02743	Serum amyloid P-component	APCS	25.387	223	19.1004	19.6248	19.454	19.1273	19.1465	18.9761	19.1855	18.7434	18.7901	19.7659	21.7	19.3945	20.4918	19.5438	18.9771	18.9072	19.6001	19.6592	21.7833	20.0299	20.0362	19.7677	19.2713	19.766	20.1666	19.8345	20.3941	19.8852	19.9406	19.9907	19.967	19.8297	19.5917	19.9837	19.1399	20.4475	20.0601	20.0005	19.4481	20.4572	0.567505	0.0272693	0.812886	0.154343
Q8IUL8	Cartilage intermediate layer protein 2	CILP2	126.29	1156	11.8814	11.8178	11.8178	13.2477	12.2135	11.9456	11.4927	11.5284	11.9624	11.4534	14.3081	12.6877	12.0237	12.9928	12.3065	11.7041	12.0394	12.5901	14.2979	12.3464	11.0291	11.5691	12.0237	11.1607	11.7041	11.5649	13.1683	11.8549	11.8335	12.1672	11.3442	11.4242	11.1359	11.5481	11.7609	11.3475	11.4983	11.6391	11.3475	13.3626	0.576905	0.0272765	1.52486	0.011305
P20337	Ras-related protein Rab-3B	RAB3B	24.758	219	13.3344	13.4547	13.3532	13.6262	13.5089	13.7905	14.0589	13.6719	13.3563	13.5191	14.0845	13.5975	14.7786	13.5801	13.8254	15.9356	13.9771	13.5127	13.6593	15.0779	14.3349	13.8487	13.2465	13.439	13.6998	13.7793	13.8227	13.4805	13.7265	14.2221	13.8831	14.192	14.2854	13.9296	13.5433	13.382	13.4463	13.6764	13.3905	14.0226	0.643735	0.0273483	1.08491	0.480198
Q9NPA8	Transcription and mRNA export factor ENY2	ENY2	11.528	101	17.4492	17.5159	17.5183	17.8194	17.6774	18.0355	17.9668	17.7077	17.4499	17.4424	17.3255	17.0773	17.4635	17.4142	17.5246	18.0451	17.3927	17.3698	17.1185	17.1808	17.8471	17.1188	17.2829	17.1232	17.1405	17.0549	16.8753	17.3235	17.5585	16.7203	17.4218	17.4672	17.43	17.109	17.112	17.1531	17.0863	16.9642	17.2357	17.0229	1.20333	0.0273543	1.25037	0.000478071
P17275	Transcription factor jun-B	JUNB	35.879	347	15.0073	13.998	13.394	14.18	14.3632	14.2112	14.4293	14.5704	14.5069	12.7717	12.4093	14.1977	13.019	12.8052	14.1065	14.0775	13.3566	14.1895	12.8903	13.4115	13.6988	14.2004	13.4267	13.2747	12.7231	13.3893	13.0043	13.3561	13.2338	13.0625	13.384	12.7522	13.4113	13.5945	12.5395	12.8228	13.7623	13.2382	13.2457	12.8828	1.62097	0.0275323	1.45861	0.0055991
P0C0L5	Complement C4-B	C4B	192.75	1744	21.175	20.7904	21.9938	21.1191	21.3538	21.1095	21.2918	21.3849	21.2714	21.5117	21.7116	21.6197	21.8421	21.9583	21.8665	20.922	21.7343	21.141	21.9698	21.7965	22.1461	21.5602	21.6197	22.0343	21.948	21.8486	21.3849	22.2086	22.0697	22.181	21.7518	22.2225	21.8193	21.7748	21.3428	21.6791	22.012	21.948	21.7798	21.5244	0.781297	0.0275593	0.776666	0.00100393
O75688	Protein phosphatase 1B	PPM1B	52.642	479	16.7622	16.7819	17.053	16.8896	17.1478	16.74	16.7488	16.6808	17.1928	17.0022	17.0382	16.9452	17.0916	17.0044	16.9209	17.1125	17.2955	16.9846	17.0699	17.1865	16.7562	16.9186	17.0319	16.9415	17.1248	16.6997	17.251	16.9055	16.85	16.9991	16.7092	17.1868	17.5816	17.0076	17.4041	16.974	17.2479	17.0051	16.8036	17.2279	0.891916	0.0277233	0.966677	0.454142
Q7Z4H8	KDEL motif-containing protein 2	KDELC2	58.572	507	16.6957	16.6295	17.0102	16.6156	16.4875	16.6354	17.2802	16.7266	16.6168	17.1601	17.3273	17.169	17.3177	16.9587	16.8825	17.0106	17.0681	16.6199	17.3476	16.8617	16.9543	16.9612	17.2314	17.3444	17.3924	17.1265	16.7723	17.0385	17.2304	17.6552	17.1238	17.2113	17.3814	17.0139	16.9829	17.2566	17.1977	17.3092	17.0146	16.9541	0.82899	0.0277687	0.848759	0.00432759
Q03001	Dystonin	DST	860.65	7570	18.9608	18.7168	19.0538	18.7233	19.2193	18.8103	18.8395	18.7426	19.2243	18.9078	18.9654	19.1449	18.8676	19.1684	19.8646	19.1483	19.0229	19.3044	19.2193	19.0287	18.9242	18.9668	19.1337	19.1587	19.0187	18.8051	19.3546	18.9457	19.0021	19.09	18.9668	19.0986	19.0128	18.9417	19.4134	19.0645	19.2825	18.8674	19.0326	19.5463	0.83879	0.02781	0.976258	0.636467
Q9Y5S1	Transient receptor potential cation channel subfamily V member 2	TRPV2	85.98	764	15.0542	14.9797	15.3024	14.8734	15.2151	14.8537	14.9358	15.2451	15.363	14.968	15.3493	15.464	15.1837	15.4763	15.4788	15.0399	15.6689	15.0783	14.9802	15.289	14.9797	15.0684	15.3405	15.2419	15.1157	15.1603	15.3924	15.2611	15.3308	15.5158	15.0428	15.2627	15.501	14.8831	15.3616	15.3701	15.3277	15.1995	15.1328	15.3795	0.85749	0.0279095	0.963635	0.410043
Q9NY12	H/ACA ribonucleoprotein complex subunit 1	GAR1	22.348	217	17.5827	17.3278	17.4287	17.0227	17.2074	17.7969	17.6995	17.4984	16.883	17.2968	16.7474	16.9864	17.2936	17.2711	16.9354	17.6604	16.9411	17.0534	16.7886	17.0772	16.8967	16.9946	17.4582	17.1035	17.1488	17.5395	16.8759	17.1241	17.2568	16.9277	16.9251	16.8485	17.1712	16.9969	17.9246	17.1974	17.2884	16.9527	17.1913	17.1879	1.23024	0.0281458	1.05295	0.419476
Q86UX2	Inter-alpha-trypsin inhibitor heavy chain H5	ITIH5	104.58	942	14.8528	14.6362	15.5265	15.1669	15.2518	15.0447	14.8241	14.9173	15.4374	16.2946	16.1822	15.1918	15.4423	15.6483	15.4645	15.6062	15.6663	15.4183	16.4763	15.4836	15.7144	15.9113	15.5572	15.8006	16.1686	15.4499	15.5653	15.7746	16.0206	16.1207	15.8672	16.0462	15.7384	15.822	15.8622	15.7609	15.4684	15.7701	15.3973	15.6867	0.725607	0.0282201	0.785389	0.00559157
O14841	5-oxoprolinase	OPLAH	137.46	1288	17.4985	17.7386	17.6238	17.8429	17.7131	17.7592	17.544	17.7375	17.7978	17.7696	17.8977	18.1292	17.7443	17.9306	17.8679	18.3793	17.7779	17.5397	17.9191	17.7613	17.971	17.6349	17.6888	17.8325	17.7773	17.5692	17.9857	17.7753	17.7048	17.9345	17.8692	17.9686	17.655	17.7984	17.7849	17.5686	17.6628	17.9259	17.7576	18.0726	0.875252	0.0282746	1.00119	0.975497
Q8N6Y2	Leucine-rich repeat-containing protein 17	LRRC17	51.799	441	12.3708	11.6583	11.9469	12.1172	11.8985	11.5017	12.0868	12.0964	12.0187	12.2838	12.6251	11.8853	12.5646	12.4337	11.9699	12.2609	12.154	11.9537	12.6921	12.4301	12.4775	12.467	12.4337	13.1646	12.3584	12.938	12.4301	12.6392	12.8957	12.9304	12.715	12.715	12.8658	13.2053	12.8736	12.0434	12.2427	12.7322	12.799	12.5174	0.812801	0.0282936	0.695064	3.67314e-06
P35611	Alpha-adducin	ADD1	80.954	737	17.7137	17.6724	18.0643	17.7098	17.7098	17.7432	17.5363	17.7625	17.7706	17.7617	17.8918	17.6744	18.3973	18.3645	17.7626	17.9142	17.7757	17.7098	18.0885	18.0565	17.8992	17.9459	18.0183	18.155	18.0275	17.8871	18.1616	18.0161	17.9967	18.2488	17.9013	18.1031	18.1532	17.8577	17.8219	17.9834	17.9007	18.4538	18.0064	18.1417	0.859103	0.0283191	0.882714	0.00592563
Q6P1N9	Putative deoxyribonuclease TATDN1	TATDN1	33.601	297	14.5766	15.3484	14.466	14.9386	14.6577	14.8706	14.7056	14.9911	14.6321	15.2455	14.4318	14.8932	14.5726	14.4406	14.6378	14.818	14.3063	14.7492	14.1866	14.6254	14.606	14.3326	14.4199	14.7505	14.9239	13.9846	14.2312	14.1869	14.2371	14.2797	14.5542	14.3941	14.4382	14.6455	14.8047	14.7564	13.9288	14.2065	14.9778	14.2917	1.21174	0.0284644	1.19512	0.00857946
Q96DI7	U5 small nuclear ribonucleoprotein 40 kDa protein	SNRNP40	39.31	357	17.1826	17.2676	17.2192	16.9499	17.3059	17.1031	17.2054	17.3156	17.0451	17.2471	17.2192	17.4863	17.2612	17.1452	17.6645	17.1586	17.5854	17.2443	17.2443	17.5253	17.4256	17.3236	17.3377	17.3727	17.3833	17.4229	17.3574	17.6199	17.5294	17.5134	17.3638	17.3397	17.3863	17.3661	17.5061	17.3822	17.4112	17.2973	17.3898	17.4794	0.88928	0.0285137	0.90651	0.00243922
Q13619	Cullin-4A	CUL4A	87.679	759	17.9819	17.8374	18.2599	17.5929	18.0806	18.1361	18.1263	17.9957	18.5166	18.0952	18.2783	18.6658	18.0501	18.2063	18.7037	18.1886	18.3909	18.1338	18.4946	18.0716	18.3041	18.2988	18.4178	18.4816	18.3926	18.0826	18.6568	18.2914	18.2442	18.4115	18.2282	18.2941	18.47	18.1736	18.9106	18.8084	18.2266	18.1361	18.4414	18.8699	0.837341	0.0285365	0.860536	0.0102519
P84098	60S ribosomal protein L19	RPL19	23.466	196	18.508	17.8542	17.9204	18.1131	18.0553	18.0404	17.5391	17.4533	17.8432	17.6367	17.1848	17.7793	17.4241	17.4026	17.8414	18.1757	17.1151	17.7329	16.4825	17.5802	17.3738	17.3489	17.7535	17.2708	17.0234	17.5882	18.3571	17.3661	17.3783	16.5278	17.338	17.0928	17.1326	17.1577	17.2762	17.231	17.1775	16.493	17.9951	18.0724	1.34213	0.0286276	1.2626	0.0230265
Q07507	Dermatopontin	DPT	24.005	201	17.2497	17.4863	17.8583	17.4287	17.3901	17.192	17.1966	17.283	17.1441	18.0742	18.0325	17.3645	18.1654	17.7033	17.7079	17.2655	17.9056	17.3586	18.3731	18.116	18.2265	17.9867	18.0772	18.1816	18.1571	17.9618	17.9925	18.3561	18.2393	18.7457	17.8335	18.1492	18.2458	18.1068	17.5397	17.8742	18.1969	18.6676	18.0445	17.9682	0.77435	0.0286542	0.700876	1.99584e-05
O14907	Tax1-binding protein 3	TAX1BP3	13.735	124	14.4116	14.0979	15.3075	13.9863	13.7334	14.2316	14.503	14.4667	14.8604	14.6808	14.5818	14.8294	14.6463	16.529	15.5065	14.4323	15.297	15.0399	14.51	14.7727	15.1017	14.3988	14.9053	15.7109	14.9487	14.4773	14.8023	14.8975	15.0844	15.1502	14.9077	14.71	14.1395	15.1029	14.7464	14.9055	14.8869	14.4028	15.084	14.914	0.665923	0.028771	0.905868	0.369548
P11171	Protein 4.1	EPB41	97.016	864	17.9449	17.9095	17.8976	17.9089	18.1544	18.0148	17.8828	18.0107	18.1076	18.2075	18.4552	18.2426	18.355	18.0064	18.3631	17.7408	18.5371	17.8765	18.5006	18.1851	18.143	18.2451	18.0169	18.4041	18.5959	18.327	18.5295	18.3394	18.1226	18.8458	17.9226	18.9591	18.8408	18.1493	18.6644	18.2781	17.9976	19.0432	18.3014	19.0165	0.857156	0.0289814	0.799933	0.00165339
P49961	Ectonucleoside triphosphate diphosphohydrolase 1	ENTPD1	57.964	510	18.5446	18.1057	19.0901	18.3595	18.6514	18.3092	18.735	18.453	18.1413	18.5092	19.0218	18.4789	19.3535	18.9953	18.8873	18.5088	18.6305	18.3975	18.7755	19.0003	18.7305	19.1768	18.9641	19.1932	19.0362	19.2324	18.8353	19.0165	19.1853	19.0679	18.6713	18.7321	19.1768	19.051	18.6261	18.7934	19.2264	19.4447	18.9263	18.8107	0.803825	0.0291582	0.785985	0.000394831
Q05707	Collagen alpha-1(XIV) chain	COL14A1	193.51	1796	20.2555	20.6469	21.6015	20.6946	20.7237	20.5039	20.4702	20.8006	20.9523	21.3441	22.0433	20.9582	21.2476	21.0009	20.9477	20.7165	22.0086	20.6946	21.712	21.5307	22.6152	22.0433	21.3181	22.1823	21.8452	21.9608	20.9466	22.1459	22.0253	22.6129	22.0702	22.1623	21.7394	22.3024	20.9263	21.5287	22.3898	21.7459	21.6742	21.5097	0.713683	0.0294661	0.556878	3.73309e-06
Q04637	Eukaryotic translation initiation factor 4 gamma 1	EIF4G1	175.49	1599	20.032	20.5208	19.6262	20.361	20.2769	20.5847	20.1701	20.0156	20.3425	19.7768	19.6086	20.2702	19.6711	19.7888	20.2054	19.9411	19.7052	20.1094	19.7112	19.7817	19.8802	19.8334	19.5988	19.6232	19.3934	19.8108	19.3371	19.61	19.6448	19.3584	19.6909	19.6618	19.6585	19.7188	19.2212	19.4814	19.6456	19.5537	19.7589	19.4699	1.22383	0.029904	1.34483	3.81493e-06
O95793	Double-stranded RNA-binding protein Staufen homolog 1	STAU1	63.182	577	18.1664	18.2757	17.677	18.1052	17.7326	18.3801	18.4213	18.0311	18.1038	17.465	17.4526	17.7732	17.7075	17.7341	18.0254	17.8506	17.8772	18.0199	17.509	17.6545	17.8466	17.7609	17.8761	17.5864	17.4136	17.7175	17.6842	17.5693	17.5219	17.3888	17.908	17.8131	17.7075	17.7953	18.5802	17.4735	17.678	17.6421	17.9991	17.745	1.21034	0.0300087	1.11941	0.0687385
P61247	40S ribosomal protein S3a	RPS3A	29.945	264	19.4756	19.1579	19.2411	19.721	19.1856	19.1982	19.314	19.0148	18.947	18.8129	18.5533	19.0516	18.7775	19.1803	18.812	19.2678	18.8175	19.0481	18.6663	19.2194	18.692	18.7332	19.3459	18.5547	18.6281	19.3908	18.7324	18.8048	18.6958	18.377	18.6246	18.8176	18.9473	18.7257	18.6663	18.5737	18.5694	18.5128	18.8825	18.8418	1.20367	0.0301194	1.24596	0.000563991
Q9UBX5	Fibulin-5	FBLN5	50.18	448	16.182	16.1966	17.0916	16.4192	16.5546	16.0662	16.3232	16.0637	15.8055	16.4473	16.4536	16.4661	18.1724	16.9932	16.5879	17.6121	16.8504	16.1349	16.3705	16.804	16.3849	16.7676	17.0371	16.7089	16.902	15.9567	17.0095	16.6858	16.4594	17.4376	16.5282	16.4812	16.3733	15.9169	16.1306	15.9543	16.2431	16.072	15.8702	17.1359	0.692773	0.0304079	1.05483	0.635409
Q9GZT3	SRA stem-loop-interacting RNA-binding protein, mitochondrial	SLIRP	12.349	109	17.2023	16.8632	16.4337	17.7286	16.9343	16.9969	16.62	16.7014	17.1239	16.8804	16.2763	16.7436	16.2589	16.7684	16.815	17.2445	16.4425	16.6953	16.1839	16.4607	16.1663	16.5684	16.5933	16.217	16.2545	15.9895	16.7377	16.1988	16.2084	15.8216	16.0398	16.2143	16.4148	16.1678	16.1135	16.2015	15.9641	16.4725	16.4231	16.3308	1.28303	0.0304589	1.4278	7.64884e-06
Q96EK7	Constitutive coactivator of peroxisome proliferator-activated receptor gamma	FAM120B	103.78	910	16.1008	16.0493	16.4332	16.1354	16.1725	16.3846	15.9879	16.2059	15.8446	16.3532	16.3508	16.4229	16.2883	16.4294	16.6061	16.1564	16.2446	16.3023	16.3124	16.2252	16.2513	16.17	16.5608	16.2758	16.5071	16.277	16.4079	16.2969	16.3142	16.43	16.2543	16.3573	16.4238	16.2634	16.3027	16.3996	16.0741	16.3933	16.3469	16.4269	0.890635	0.0305315	0.941887	0.0738083
O43399	Tumor protein D54	TPD52L2	22.237	206	18.2773	17.9902	17.269	18.1843	17.6954	17.324	17.5717	17.8551	18.019	17.4709	17.5675	17.6889	17.4492	16.8088	17.5804	17.1837	17.3869	17.5867	17.6551	17.4685	17.403	17.5451	17.284	17.5893	17.5926	17.4345	17.0942	17.3621	17.4082	17.237	17.3496	17.524	17.2416	17.3636	16.7665	17.6399	17.5056	17.2259	17.704	17.0362	1.25536	0.0307858	1.17795	0.0151471
P08572	Collagen alpha-2(IV) chain	COL4A2	167.55	1712	17.9907	17.6651	17.7836	17.7478	17.6606	17.3405	17.4227	17.613	17.8197	18.6219	18.7398	18.2165	18.2432	17.8651	17.5876	17.9235	18.6108	17.6879	18.62	18.139	17.7128	17.5781	18.0199	18.0623	18.1926	17.487	18.3814	17.8189	17.9159	17.7742	17.4295	17.9283	17.8638	17.6814	18.1019	17.8321	17.8787	18.1634	17.6284	17.9174	0.759545	0.0309234	1.0692	0.380738
Q7Z3D6	UPF0317 protein C14orf159, mitochondrial	C14orf159	66.436	616	16.7893	17.0116	17.306	16.9419	17.2212	16.851	17.0513	17.0113	16.9539	17.6369	17.5777	16.9392	17.4153	17.111	17.1804	17.2337	17.5677	17.2539	17.7492	17.3347	17.577	17.4121	17.2219	17.8196	17.8689	17.4775	18.2212	17.5907	17.4864	17.3578	17.6318	17.7821	17.6414	17.7868	18.3077	17.7761	17.4567	18.0196	17.6188	17.7658	0.835749	0.0310409	0.714926	2.21093e-06
Q9GZR2	RNA exonuclease 4	REXO4	46.671	422	15.0909	16.1152	13.9631	15.0253	14.5477	14.467	14.9828	14.8855	14.7571	13.8323	13.673	13.9578	14.5072	13.9728	14.1113	14.6864	14.1768	14.4951	14.5866	14.1782	13.6077	13.7432	13.7559	13.4673	13.6197	13.8198	13.8682	13.5448	13.6496	13.8078	14.3333	14.0842	13.7455	13.589	13.7673	13.7728	14.0773	12.8715	13.8036	13.6193	1.4461	0.0310959	1.70908	3.18332e-06
P38159	RNA-binding motif protein, X chromosome	RBMX	42.331	391	18.8676	19.0094	18.4991	18.4013	18.4666	18.9408	18.7411	18.6425	18.617	18.21	17.7859	18.3184	18.5441	18.2645	18.526	18.783	18.141	18.5096	18.0361	18.5853	18.0084	18.1666	18.5293	18.0959	18.1155	18.5041	17.8656	18.1264	18.1761	18.4373	18.5059	18.3917	18.2266	18.0624	18.0731	18.4666	18.1955	17.7647	18.1505	17.8593	1.22275	0.03119	1.23832	0.0008927
Q5U651	Ras-interacting protein 1	RASIP1	103.46	963	15.9211	15.9665	16.0244	16.0289	16.2783	15.9032	15.7571	16.1054	16.1117	15.8989	16.1438	15.9619	16.0716	16.6104	16.3129	16.174	16.2504	15.8443	16.2689	16.2311	16.4414	16.1779	16.0662	16.3729	16.2714	15.9382	16.5087	16.4149	16.3017	16.5758	16.3513	16.3366	16.3234	16.3163	16.0074	16.398	16.1687	16.4851	16.2728	16.6727	0.878194	0.0313291	0.854506	0.000605408
P11047	Laminin subunit gamma-1	LAMC1	177.6	1609	19.1836	18.7358	19.3448	19.1935	19.1653	18.7927	18.9032	19.0579	19.0096	19.544	19.515	19.5173	19.2472	19.0964	19.2065	19.1905	19.7899	19.0884	19.6705	19.2057	19.1373	19.3671	19.4718	19.2863	19.4118	18.8579	19.6295	19.1188	19.4299	19.4937	18.9322	19.0806	19.4479	19.12	19.8031	18.9563	19.3132	19.6227	18.9084	19.541	0.835274	0.0313739	0.950272	0.399978
Q00013	55 kDa erythrocyte membrane protein	MPP1	52.296	466	14.98	15.0887	15.0425	14.6402	14.5911	14.5956	14.8062	14.8302	14.7809	14.9192	15.301	15.403	15.1337	14.7074	15.0388	14.766	15.4534	14.6995	15.4183	14.9407	15.5975	15.2864	14.6443	15.2633	15.4192	15.5053	15.5707	15.2865	15.0383	15.8781	15.1085	15.4979	15.9082	15.0664	14.9668	15.3681	15.6156	15.6864	15.0768	16.0464	0.835828	0.0314155	0.739834	9.90852e-05
Q9ULC4	Malignant T-cell-amplified sequence 1	MCTS1	20.555	181	18.7553	18.9574	18.4651	19.0973	18.366	18.7337	18.7833	18.964	18.2743	18.6995	18.5907	18.3418	18.5081	18.3904	18.2091	18.6214	18.5645	18.7194	18.3711	18.4957	18.5986	18.7174	18.3579	18.3648	18.4412	18.6999	18.5514	18.4721	18.3775	18.5283	18.5891	18.5081	18.7225	18.7317	18.4195	18.469	18.6401	18.4299	18.4399	18.4103	1.17149	0.0314418	1.05113	0.247324
Q8N3F8	MICAL-like protein 1	MICALL1	93.44	863	16.3162	15.4849	16.0374	16.8602	16.179	16.0885	15.7791	16.4067	16.4206	15.4716	15.4591	15.6132	15.6114	15.5463	15.3188	16.3867	15.7234	16.2363	15.4931	15.5647	15.8233	15.8815	15.877	15.4081	15.3027	15.5682	15.347	15.6813	15.7848	15.3454	15.6604	15.6238	15.951	15.5059	16.2099	15.3837	15.5237	15.4769	15.5672	15.3032	1.32787	0.0315372	1.22146	0.0140262
Q15631	Translin	TSN	26.183	228	18.3347	18.3252	18.7393	18.0991	18.2679	18.3661	18.1028	18.3063	18.6334	18.7213	18.547	18.4419	19.0134	18.6383	18.6174	18.8038	18.3353	18.4457	18.9625	18.4912	18.1083	18.3234	18.6721	18.4685	18.6417	18.6999	18.0917	18.5271	18.7131	18.8395	18.2175	18.6491	18.9316	18.4481	18.3429	18.6717	18.5517	18.2398	18.6178	18.372	0.846712	0.031872	1.00227	0.966671
P57735	Ras-related protein Rab-25	RAB25	23.495	213	17.9152	17.1402	17.1776	17.4617	17.1134	17.5726	17.1712	17.3682	17.4997	17.3133	17.1409	17.3968	16.8443	16.9504	17.1598	17.2385	17.0666	16.9533	17.4864	17.1482	17.6234	17.4197	17.296	17.7774	17.3956	17.2403	17.2952	17.7131	17.745	16.8797	17.5956	17.2346	16.9087	17.6288	16.9629	17.2228	17.287	17.4116	18.1086	17.2794	1.17672	0.0322759	0.904161	0.112208
P07814	Bifunctional glutamate/proline--tRNA ligase	EPRS	170.59	1512	20.8328	20.9611	20.8036	20.9032	20.7182	21.2139	20.698	20.6455	20.4973	21.2769	20.7553	20.414	20.8612	20.4294	20.4532	20.7954	20.445	20.7657	20.6792	20.7383	20.5877	20.6848	20.593	20.5651	20.6349	20.9484	20.6236	20.6615	20.6929	20.507	20.7633	20.8612	20.7264	20.7343	20.2842	20.8404	20.5864	20.6012	20.5731	20.6803	1.16587	0.0323334	1.06206	0.167151
Q4ZHG4	Fibronectin type III domain-containing protein 1	FNDC1	205.56	1894	14.4065	13.7143	14.7463	14.2098	13.7771	14.0651	14.5486	14.3994	14.0087	14.0295	14.3673	14.5171	14.5496	15.3946	14.4286	14.1379	15.5147	14.7048	14.2376	14.2922	14.0856	14.5682	14.6075	14.7594	14.1705	14.272	14.5303	14.5354	14.6116	15.5287	14.1204	14.2857	15.014	14.0509	14.4499	14.3847	14.9854	14.2865	14.4306	14.5128	0.745415	0.0324221	0.928508	0.413023
Q9HCB6	Spondin-1	SPON1	90.973	807	16.7241	16.9207	16.9713	17.1119	17.2264	16.8864	16.661	16.865	17.0923	17.4924	17.3318	17.2875	17.1022	17.085	17.647	17.4064	18.012	16.7955	17.0859	17.2602	17.4837	17.2274	17.2159	17.1662	17.0757	17.2795	16.7828	16.9803	17.3039	17.593	17.5793	17.4572	17.2059	17.0178	16.9955	16.8534	17.3293	17.2849	16.9836	17.2112	0.808771	0.0324487	0.963883	0.554376
Q9H3H5	UDP-N-acetylglucosamine--dolichyl-phosphate N-acetylglucosaminephosphotransferase	DPAGT1	46.089	408	17.5161	16.9469	17.2603	16.4976	17.3682	16.4667	16.7643	16.5867	16.7134	17.6799	16.6169	16.5353	17.134	16.478	15.8813	16.5115	16.2546	16.6152	16.7631	16.9005	16.0811	16.4717	16.918	16.6248	16.9056	16.73	16.172	16.3574	16.318	15.978	16.1998	16.5568	17.1221	16.4707	16.7239	17.1565	16.4848	16.6689	16.5167	16.1659	1.32958	0.0324995	1.18378	0.0556826
Q2TBA0	Kelch-like protein 40	KLHL40	69.257	621	16.8009	16.7108	17.5221	17.0584	17.4243	17.1118	17.0322	17.0214	17.3173	17.2685	17.2484	17.3512	17.4656	18.5876	17.3762	17.1042	17.7617	16.9369	17.8577	17.484	17.2918	17.0626	17.7246	18.0644	17.9817	17.8286	19.0808	17.7572	17.6725	17.7534	17.1275	17.9161	17.6307	17.206	19.8223	17.6408	17.7175	18.822	17.5284	19.0987	0.762843	0.0325091	0.653234	0.00220071
Q9Y259	Choline/ethanolamine kinase	CHKB	45.271	395	13.6034	13.1902	14.4251	14.0606	14.2298	13.7989	13.4326	13.6318	13.526	14.1494	14.1735	14.1864	14.1897	14.5883	13.8274	14.0922	13.6779	14.4794	14.1923	14.1351	13.9533	13.6208	14.6171	13.6372	13.776	13.4544	14.1636	14.1594	13.945	14.263	14.2677	13.8225	13.8126	14.1897	13.252	13.9479	13.9071	13.6821	13.7258	14.183	0.784892	0.0326164	1.04282	0.58628
Q3YEC7	Rab-like protein 6	RABL6	79.548	729	16.4453	16.3958	16.7335	16.5149	16.8191	16.5475	16.8845	16.546	16.236	16.794	16.6681	17.1213	16.4509	17.1626	17.1637	16.5176	16.7182	16.8464	17.8665	16.8082	16.5944	16.5708	16.9563	16.4272	16.8537	16.3796	16.5809	16.6369	16.8021	16.6362	16.5336	16.7914	16.5014	16.4334	17.1882	16.5717	16.4558	16.4766	16.5288	17.3584	0.789671	0.0327378	1.07039	0.333071
Q9Y3C6	Peptidyl-prolyl cis-trans isomerase-like 1	PPIL1	18.237	166	18.1121	18.234	18.0189	18.5685	18.5624	18.9235	18.7487	18.4545	18.3098	18.2836	17.7715	18.0037	18.1072	17.5484	17.7193	18.6614	18.3338	18.6836	17.8808	18.016	17.6469	17.9813	18.2814	17.7787	17.9027	17.8226	18.2183	17.8426	17.7562	17.5876	17.7273	18.0155	17.7024	17.877	19.9879	18.1927	17.8894	17.4246	18.1066	18.1482	1.27371	0.0328	1.19134	0.085912
Q86UD1	Out at first protein homolog	OAF	30.688	273	14.6652	14.6361	14.6118	15.0147	15.0697	14.4471	14.8283	14.2326	14.6827	15.136	16.837	15.3871	14.6639	15.2834	15.0733	14.5442	14.6651	15.0467	16.7669	15.3694	14.8002	14.6988	14.524	14.6783	14.7164	14.5957	14.543	14.9238	14.9284	16.0063	14.6937	14.8927	15.2996	14.5672	15.1515	14.6705	14.6476	14.8154	15.2889	14.9284	0.645611	0.0328056	1.13252	0.299126
Q9Y3B4	Splicing factor 3B subunit 6	SF3B6	14.585	125	17.5016	17.6144	16.9299	17.0369	17.4231	17.5625	17.6654	17.9156	17.4004	16.8977	16.5042	17.6987	17.0964	16.0299	17.4936	17.6488	16.7559	17.0877	16.2503	16.2727	16.9349	16.9841	17.1316	16.722	16.6401	17.1914	16.4701	17.0279	17.4261	16.3654	17.32	16.7521	16.6731	16.9611	16.2515	17.1436	17.0029	16.5321	16.9031	16.2042	1.42494	0.032851	1.23748	0.0405007
O43172	U4/U6 small nuclear ribonucleoprotein Prp4	PRPF4	58.449	522	16.1391	15.7151	14.9649	15.6744	15.7521	15.2976	15.2702	15.6036	15.78	15.2532	14.8639	15.2801	15.3692	15.2455	15.0341	15.6183	14.8628	15.4665	14.4141	15.5685	14.9108	15.2881	15.1929	15.1332	15.0896	15.2071	14.8338	15.2839	15.4654	15.077	15.2259	15.3289	15.2391	15.1072	15.2455	15.2609	14.9991	14.3843	15.4995	14.8042	1.29478	0.0329097	1.1727	0.0361593
P41567	Eukaryotic translation initiation factor 1	EIF1	12.732	113	13.6388	13.5192	13.0571	12.6108	13.2461	13.6601	13.1163	12.8297	12.3488	13.1773	12.7099	12.5538	12.8742	12.6814	12.1184	13.002	12.5808	12.9465	13.2147	12.6794	12.4846	12.8151	13.1664	12.9356	13.2707	12.9573	12.8957	13.3741	13.3335	12.3951	12.6212	12.6721	12.4342	13.2729	12.4763	13.485	12.0304	13.0543	13.2599	12.5795	1.30523	0.0329452	1.03711	0.685296
Q99707	Methionine synthase	MTR	140.53	1265	11.6697	11.4027	11.8293	11.5091	11.4019	11.4019	11.6301	11.8256	12.3187	11.8002	12.5034	11.8646	11.6913	11.8449	12.21	11.4019	12.3376	11.7863	12.1875	12.1799	11.9957	11.9362	11.6913	11.8849	12.2457	12.1798	12.2433	11.8968	12.0352	12.2224	11.7836	12.6297	12.4802	11.8293	12.1523	11.8019	12.0157	12.8099	11.9295	12.4187	0.800058	0.0330571	0.82973	0.011991
Q15029	116 kDa U5 small nuclear ribonucleoprotein component	EFTUD2	109.43	972	19.4108	19.5732	19.5207	19.1872	19.3928	19.5807	19.563	19.4729	19.5271	19.0247	19.1619	19.2804	19.3124	18.9282	19.2551	19.4147	19.2188	19.3194	19.2311	19.4321	19.3124	19.3404	19.3217	19.3127	19.1614	19.6294	19.1338	19.1927	19.1927	19.2777	19.4021	19.3471	19.3991	19.5125	19.1988	19.2528	19.518	19.6365	19.2954	19.2994	1.12496	0.0330779	1.00245	0.946221
P61769	Beta-2-microglobulin	B2M	13.714	119	19.3305	19.4472	19.4494	18.804	19.6422	19.3658	19.4041	19.6305	18.3407	18.8732	18.591	18.7856	19.0509	19.0005	18.5856	18.9058	18.8665	19.4342	18.5605	18.8871	18.5601	19.171	19.3187	19.0276	19.2973	18.6041	18.6387	18.7593	18.691	18.8285	18.5309	18.8463	18.6781	18.7843	18.5545	19.1462	18.6401	19.0109	18.6285	18.4243	1.28521	0.0331296	1.1816	0.0280519
Q9NWT8	Aurora kinase A-interacting protein	AURKAIP1	22.354	199	15.9784	16.0361	15.9945	15.5242	16.4186	16.0775	16.0807	16.2676	16.5666	15.8913	15.6624	16.1303	15.0583	14.8261	16.6471	15.6921	15.7029	16.076	15.1723	15.2923	15.5899	15.5508	16.3716	15.2895	14.9594	15.7366	15.85	15.4817	15.5382	14.273	16.1212	14.8913	15.1481	15.7616	15.8318	15.4902	16.0672	15.1991	15.8122	15.5034	1.37322	0.0331689	1.25824	0.0370766
P08236	Beta-glucuronidase	GUSB	74.731	651	17.6311	17.4899	18.1625	17.5927	17.7683	17.4962	17.7227	17.4716	17.8648	18.4986	18.2561	17.8094	17.8373	18.7719	18.2267	18.1687	17.929	17.6345	18.0115	18.641	18.13	17.8378	18.0204	17.9534	18.3438	18.8109	17.5114	17.8968	18.0461	18.1081	18.2366	18.0285	18.3396	18.1581	17.327	18.7745	18.3645	18.0016	17.645	17.7008	0.779833	0.0332001	0.924975	0.352445
P28068	HLA class II histocompatibility antigen, DM beta chain	HLA-DMB	28.931	263	14.9017	14.5883	13.7903	13.2612	14.063	13.8229	13.927	13.4679	14.479	12.8744	13.2426	13.2426	13.9903	12.9485	13.0291	13.7391	13.8382	13.2649	13.4639	13.1967	13.5647	14.0588	13.5695	14.0439	13.9954	13.4376	14.0245	12.9908	12.8597	13.2428	13.5116	13.4401	13.5581	13.6181	13.902	14.417	13.6599	13.4335	14.3688	14.0148	1.43593	0.0332163	0.980099	0.853409
Q7Z6K3	Protein prenyltransferase alpha subunit repeat-containing protein 1	PTAR1	46.405	402	12.356	12.417	12.5523	12.2871	12.5883	12.2962	12.5419	12.5264	12.9275	12.6297	12.6094	12.7244	12.5644	13.1438	12.9922	12.311	13.2838	12.4718	12.8631	12.7682	12.781	12.1768	12.6094	12.5678	13.0051	12.5883	12.4493	12.7812	13.6545	12.9591	12.6094	12.7729	12.656	12.1489	13.0546	12.6029	12.8428	12.2266	12.5883	12.3014	0.834529	0.0335218	0.982078	0.795771
P15170	Eukaryotic peptide chain release factor GTP-binding subunit ERF3A	GSPT1	55.755	499	19.321	19.5407	19.1053	19.5721	19.4849	19.4362	19.2559	19.0173	19.2727	19.164	18.9514	19.2236	19.1527	19.0114	19.4428	19.2306	19.0573	19.296	18.9764	19.0274	19.0404	19.091	19.1703	18.7832	18.8351	18.918	18.97	19.034	18.8423	18.8903	19.0636	18.9288	18.9635	18.9357	18.8679	18.9354	18.9635	18.7103	19.0042	19.2328	1.13292	0.0335588	1.20411	7.38444e-06
Q9Y4P3	Transducin beta-like protein 2	TBL2	49.797	447	18.6669	17.3742	17.9407	18.0911	18.3187	18.0499	18.1627	17.7472	17.6784	18.2805	17.5041	17.6088	17.914	17.6514	17.7527	17.7881	17.6121	17.7617	17.861	17.974	17.1928	17.5009	17.5597	17.7303	18.0571	18.2836	17.2015	17.8669	17.8126	17.3567	17.1382	17.6584	17.7562	17.5561	17.3188	17.885	17.6377	17.1797	17.3171	17.4744	1.22116	0.0336844	1.24204	0.00301338
Q9BUL8	Programmed cell death protein 10	PDCD10	24.701	212	17.7283	18.2809	17.0914	17.2105	16.8169	18.0008	17.8639	17.9489	17.9005	17.3954	17.2373	17.036	17.4891	16.0876	16.3361	17.9922	17.2589	17.3574	17.1132	17.1036	17.6875	17.5455	16.676	17.3086	17.3856	17.4039	16.3967	17.6217	17.6632	16.7151	17.9795	17.35	17.022	17.9537	16.3978	17.725	17.1209	16.443	17.7628	16.2556	1.43654	0.0337332	1.10324	0.428874
P13591	Neural cell adhesion molecule 1	NCAM1	94.573	858	14.0028	13.8283	14.6032	14.1581	14.0277	13.8683	13.7065	13.9102	14.6934	14.4812	14.2268	14.1838	14.2284	15.3111	14.3947	14.6217	14.8965	14.0455	14.7962	14.3861	14.3224	14.0676	14.6011	14.6722	14.4815	14.0764	15.3151	14.5432	15.2118	14.7646	14.1069	14.342	14.5094	14.1285	16.2117	14.4151	15.8501	14.6684	14.0175	15.0206	0.767853	0.0337559	0.785793	0.0379415
Q9BRX8	Redox-regulatory protein FAM213A	FAM213A	25.764	229	17.4231	16.8976	16.8477	17.899	17.4007	17.1814	16.7745	17.1578	17.2442	16.6938	16.3803	16.7939	16.8594	16.1295	16.5673	17.1466	16.6167	17.592	16.655	16.8148	17.2202	17.1421	17.0249	16.7428	16.2774	16.2597	16.6359	17.0202	17.276	16.6106	16.8304	16.707	16.3737	17.4444	16.7626	16.4859	16.8179	17.1108	17.2171	16.3576	1.31623	0.0337768	1.10031	0.274646
Q9NV06	DDB1- and CUL4-associated factor 13	DCAF13	51.402	445	13.0503	13.2516	12.1767	12.3651	11.8944	12.9484	12.3575	12.0652	12.5109	11.8463	11.7357	11.7972	12.3642	11.7201	11.3983	12.7298	12.0403	12.4975	11.2973	11.9795	11.9158	12.112	11.946	11.7048	11.8151	12.0692	12.1054	11.9527	11.7681	12.1177	12.1669	11.8697	12.3302	12.086	12.1031	11.8151	11.7251	11.5823	12.218	12.079	1.40505	0.0338549	1.17056	0.0793849
P15502	Elastin	ELN	68.397	786	17.2692	16.7779	17.0592	17.1363	16.8827	16.9567	16.5177	16.3546	16.5775	17.6596	19.9135	17.3108	17.2894	17.2471	16.9233	16.6614	16.9118	17.649	19.6721	18.5024	16.903	17.0161	16.9345	16.9409	16.8244	16.8143	17.0534	16.6583	16.6946	17.3554	16.7817	16.9069	17.3821	16.8759	16.6949	16.7478	16.9254	17.4206	17.1498	17.4049	0.540011	0.0339751	1.30982	0.0865225
P42773	Cyclin-dependent kinase 4 inhibitor C	CDKN2C	18.127	168	12.9053	13.0986	13.1969	13.2611	13.4686	13.6238	12.9462	13.0676	13.1621	13.5065	13.7598	13.1969	13.3269	13.2752	13.3488	13.9739	13.4495	13.1837	14.0642	13.5542	13.9747	13.424	13.1269	13.023	13.3928	13.0493	13.4354	13.6629	13.6273	14.2438	13.7266	13.6285	13.7833	13.5987	13.995	13.2611	12.8757	13.4334	13.2565	13.4687	0.8181	0.0339786	0.913256	0.219622
Q92688	Acidic leucine-rich nuclear phosphoprotein 32 family member B	ANP32B	28.787	251	18.5534	18.8578	18.5508	18.4141	18.6971	18.8885	18.7431	18.6266	18.3184	17.8724	17.6413	18.4564	18.4085	18.1521	18.2838	18.7519	18.0498	18.3909	17.5454	18.3761	17.8534	17.8929	18.7103	17.657	17.7775	18.2725	17.5648	18.0619	18.0904	17.5534	18.1558	17.8984	17.9246	17.8917	17.462	18.1828	18.145	17.5032	17.8531	17.5467	1.27158	0.034198	1.39382	8.52873e-05
O15484	Calpain-5	CAPN5	73.168	640	16.4413	16.6741	16.5966	16.5047	16.7637	16.2625	16.4826	16.3517	16.6228	16.7279	16.9954	16.748	16.9403	16.2983	16.5928	16.4897	16.8721	16.88	16.8093	16.7766	17.0427	17.1565	16.9114	17.1101	16.9223	16.8357	16.637	17.1624	17.4844	16.8612	17.3416	17.0094	16.7816	17.1683	16.3753	16.85	17.0524	17.1273	16.9298	16.7966	0.872082	0.0341991	0.792079	4.35088e-05
P02008	Hemoglobin subunit zeta	HBZ	15.637	142	15.994	15.916	16.737	16.4449	16.3508	16.269	15.9968	15.8606	15.6831	16.6986	16.8037	16.3564	16.4483	17.0468	17.9201	16.0926	16.8522	15.9739	16.9795	16.3584	16.5956	16.5455	16.7637	17.0869	16.7249	16.7396	17.2001	17.0019	16.7737	16.8735	16.422	16.8677	16.8537	16.5915	18.6417	16.265	17.0912	17.3155	16.6878	17.1311	0.712963	0.0342079	0.722224	0.00578101
P17252	Protein kinase C alpha type	PRKCA	76.749	672	15.1518	15.3604	15.674	15.4294	15.3362	15.077	15.6423	15.4559	15.2444	15.7278	16.0231	15.4641	15.7221	15.5842	15.5435	15.3579	15.4787	15.5	15.8239	15.7814	15.674	15.7536	15.5412	15.7323	15.7404	15.5563	15.3065	15.4883	15.9209	15.2641	15.6171	15.6756	15.5271	15.5384	15.5883	15.665	15.9675	15.6017	15.4223	15.398	0.859773	0.034228	0.946034	0.234088
Q9Y6N5	Sulfide:quinone oxidoreductase, mitochondrial	SQRDL	49.96	450	19.7909	19.3428	19.7447	19.825	19.6803	19.8841	19.8051	19.5461	19.2014	19.5761	19.2193	19.3381	19.5815	19.6062	19.2414	19.6347	19.2727	19.7591	19.2194	19.3396	19.3879	19.3223	19.7536	19.405	19.4214	19.6686	19.1745	19.504	19.2926	19.436	19.434	19.4621	19.6229	19.6516	19.1408	19.5286	19.5124	19.1479	19.3745	19.3208	1.16347	0.0343425	1.07352	0.123587
O00478	Butyrophilin subfamily 3 member A3	BTN3A3	65.001	584	14.2263	14.3525	13.9229	13.744	13.9229	13.8558	14.0389	14.2577	14.1125	13.8188	13.7909	13.6393	13.8753	13.3992	13.6907	13.5726	14.2157	13.9523	14.0408	13.8011	14.2	13.7968	13.7909	14.2934	14.3062	13.7771	14.1863	14.0754	13.9927	13.8011	14.1803	13.7664	14.2998	13.8522	14.5115	13.7746	13.8452	14.3874	14.2958	13.9541	1.17079	0.0345325	0.905727	0.0741438
Q9BQE3	Tubulin alpha-1C chain	TUBA1C	49.895	449	19.7689	20.584	18.9772	19.5952	19.083	19.954	19.7373	19.8808	19.5924	18.4313	17.9895	19.3583	18.9143	18.4476	19.1635	19.1032	18.4402	20.4975	18.1725	18.7479	18.8903	19.0293	18.4409	19.0273	18.0907	18.1662	18.1959	18.8057	19.1333	18.0411	18.6775	18.1619	17.9362	19.1856	17.7439	18.0093	18.2018	17.9674	19.5373	18.2335	1.59876	0.0346001	1.67967	0.000609968
P48594	Serpin B4	SERPINB4	44.853	390	18.5559	16.9876	16.8963	18.8258	18.0202	16.8838	16.8897	18.055	17.3874	16.8134	16.7905	16.8046	16.8717	17.0129	17.0788	16.8486	17.0168	17.1964	16.8396	17.1936	16.9089	17.5652	16.9659	16.6898	16.8548	16.9558	16.8786	16.8959	17.2951	16.7255	17.4768	16.6982	17.3401	16.5921	16.4197	17.0569	17.1846	17.4175	16.9901	16.9484	1.48056	0.0346324	1.19372	0.103512
Q9NPF4	Probable tRNA N6-adenosine threonylcarbamoyltransferase	OSGEP	36.426	335	16.1246	16.4765	16.4781	16.8723	16.0937	16.8729	16.7611	16.519	16.4509	16.5499	16.3469	15.9723	16.2716	15.8703	15.8663	16.8933	16.1051	16.526	16.0818	16.255	16.3421	16.1197	16.4083	16.0893	16.1924	15.998	15.754	16.0555	16.1866	15.8004	16.4264	16.405	16.2587	16.341	15.676	16.1998	15.9606	15.8634	16.0065	16.0033	1.23204	0.0346611	1.20166	0.0047937
O95274	Ly6/PLAUR domain-containing protein 3	LYPD3	35.97	346	18.3907	18.5681	17.1753	18.3339	18.1808	18.317	17.8963	18.4899	18.181	17.0422	16.3327	17.4372	17.0488	17.546	17.7401	18.2834	17.2022	18.1338	17.1922	17.9605	18.7439	19.3615	17.6384	18.904	16.9379	16.9714	17.1039	18.6957	19.1031	17.3724	17.9303	16.9648	17.2901	19.2776	17.3327	16.6587	16.9477	17.9358	19.6923	17.0314	1.48436	0.0348038	0.918863	0.642214
Q63ZY3	KN motif and ankyrin repeat domain-containing protein 2	KANK2	91.173	851	17.4478	17.8492	17.395	17.7252	17.4506	17.4552	17.7515	17.5905	17.3961	17.7776	18.0645	17.4525	18.0626	17.6588	17.4181	17.8783	17.9888	17.9071	17.7056	17.8102	17.9094	17.7635	17.3975	18.0114	18.4789	17.5637	17.8292	17.7585	18.149	18.2535	18.1005	18.0369	17.8147	18.1139	17.3379	17.812	17.7683	17.6374	17.4947	17.7917	0.86407	0.0348147	0.893863	0.0569706
P48681	Nestin	NES	177.44	1621	18.6183	17.8936	18.1609	18.0607	18.1612	17.8687	18.161	18.1379	18.2419	18.0457	18.3434	18.5219	18.3549	18.2889	18.3594	18.0193	18.9726	18.17	18.6052	18.169	18.5018	18.6553	18.0502	18.6259	18.4986	18.0153	18.8342	18.261	18.3138	18.5529	18.3695	18.5921	18.4702	18.2177	19.0957	18.3101	18.1395	18.7076	18.1875	19.1374	0.843555	0.0348766	0.859104	0.0218288
Q86YS6	Ras-related protein Rab-43	RAB43	23.339	212	17.6552	16.5273	17.0713	17.8841	17.7554	16.8162	17.123	16.7567	16.6085	16.9769	16.0139	16.2871	17.6678	16.6116	16.4155	16.3557	16.5431	17.1863	16.4173	16.7458	15.774	16.2025	17.1331	16.1165	16.2686	16.3603	16.0223	16.3075	16.2124	16.7055	15.8038	16.2426	16.5466	15.818	16.2955	16.2707	16.3176	16.1235	15.914	16.1642	1.40742	0.0349478	1.55939	4.39541e-05
Q99959	Plakophilin-2	PKP2	97.414	881	16.3666	16.0718	16.6928	16.3175	16.4644	16.0834	16.4894	16.671	16.5699	17.5786	17.3142	17.2926	16.6438	16.7809	17.0222	16.8461	16.5361	16.6315	17.3251	16.7004	16.5783	16.692	16.94	17.1461	17.1068	16.5496	16.5447	16.453	16.4058	16.4661	16.9095	16.9716	16.1826	16.4815	16.4833	17.0853	16.7029	16.5052	16.5401	16.4957	0.769107	0.0349791	1.04097	0.601248
P62266	40S ribosomal protein S23	RPS23	15.807	143	18.4801	18.2161	17.9607	18.5133	18.1403	18.1862	17.9826	18.0118	17.9138	18.1358	17.746	17.9015	17.7183	17.2507	17.7615	18.3612	17.7856	18.2225	17.6467	18.2874	17.7842	17.9844	17.8996	17.6716	17.5479	17.8548	17.5871	17.8544	18.0623	17.7921	18.0622	17.888	17.6175	17.9497	17.7831	17.6926	17.6224	17.5584	17.8718	17.3255	1.2192	0.0351017	1.18151	0.00532011
P04003	C4b-binding protein alpha chain	C4BPA	67.033	597	19.7918	19.3798	20.6368	19.9439	19.7447	19.8655	20.2148	19.657	19.4903	19.766	19.9015	21.1442	20.2125	21.786	20.9445	19.4909	20.8082	20.5635	19.9487	19.6012	20.3217	20.0285	20.3308	20.7049	20.6246	19.8876	21.0203	20.6717	19.9957	20.2753	19.7602	19.9232	20.153	20.175	20.0791	19.93	20.28	19.7398	20.1853	21.1554	0.663852	0.0353145	0.921774	0.48939
P15259	Phosphoglycerate mutase 2	PGAM2	28.766	253	15.8843	15.7586	16.0095	15.4655	14.9838	16.2653	15.7393	15.7929	16.3	16.1414	16.2276	15.8797	16.0636	16.1102	15.9151	16.5971	17.2202	15.8829	16.2395	16.292	16.0681	15.9222	16.4716	16.502	16.5743	17.116	18.4006	16.5923	16.1537	16.507	15.9059	16.7891	16.2992	16.2907	19.4663	16.8742	16.4686	15.8559	16.555	18.2485	0.753287	0.0354513	0.609357	0.00352413
Q9BRJ2	39S ribosomal protein L45, mitochondrial	MRPL45	35.351	306	17.7254	17.755	17.4489	17.2507	16.9295	17.4703	17.5395	17.6586	17.1823	17.341	16.9665	17.1787	17.4742	17.058	17.2686	17.3835	17.2639	17.179	17.2723	17.0852	17.1949	17.3239	17.376	17.5764	17.5244	17.1021	17.5762	17.4132	17.5571	17.1328	17.3735	17.3097	17.0728	17.3232	17.2865	17.6326	17.0287	17.3297	17.4719	17.1052	1.16242	0.0354835	0.990356	0.835939
Q9BUR5	Apolipoprotein O	APOO	22.284	198	15.8042	15.8916	15.7437	15.3335	15.591	15.949	15.3029	15.4594	15.4342	15.6738	15.4074	15.5772	15.6375	15.2987	15.5782	15.346	15.5579	14.9863	15.3478	15.2673	14.9912	15.2342	15.6913	15.543	15.8631	15.2864	16.3308	15.4175	15.649	15.2761	15.2617	15.3959	15.1609	14.9957	16.0444	16.0184	15.4939	15.3829	15.3721	15.8009	1.16303	0.0355136	0.999241	0.990946
P09496	Clathrin light chain A	CLTA	27.076	248	16.798	16.2023	16.9821	16.2755	16.3827	16.2369	16.7742	16.2479	15.4317	16.4557	14.9571	15.95	16.3535	16.3217	15.5443	16.9217	15.7751	15.3222	15.4937	16.0016	14.8126	15.5238	16.7036	15.4176	15.6483	15.1245	15.2635	15.2922	15.5411	15.6559	15.0218	15.7332	16.7584	14.9468	15.6915	16.2284	16.073	15.007	15.1529	14.884	1.42861	0.03591	1.51297	0.00176031
P28290	Sperm-specific antigen 2	SSFA2	138.38	1259	17.2479	17.1938	16.769	17.3472	17.0775	17.187	17.476	17.3045	16.9691	16.7047	16.3924	17.238	16.837	16.8393	16.8011	17.1508	17.0752	17.0047	16.7376	16.6626	16.2427	16.7626	16.8899	16.556	16.3788	16.9176	16.4835	16.6081	16.7439	16.6375	16.3661	16.629	16.912	16.3597	17.4085	16.5095	17.0117	17.048	16.5808	16.3428	1.19231	0.0359775	1.25818	0.000730175
P80108	Phosphatidylinositol-glycan-specific phospholipase D	GPLD1	92.335	840	15.2793	15.2031	15.6564	15.3841	15.3422	15.4661	15.2588	15.0574	15.3316	15.9453	15.8404	15.5286	15.8017	16.054	15.6549	15.3717	16.0396	15.5709	15.562	15.184	16.5888	15.8719	15.5657	16.2844	16.3407	15.9434	15.7553	15.687	15.6584	16.1305	15.918	16.2418	15.9304	15.7445	16.0739	16.1972	15.9979	16.3459	15.7518	16.2501	0.830269	0.0360276	0.71337	3.69305e-06
Q8IXM3	39S ribosomal protein L41, mitochondrial	MRPL41	15.383	137	16.2147	16.4949	15.873	16.0945	15.9518	16.1415	16.3479	16.0262	15.994	15.9173	15.5267	16.2594	15.7423	15.3466	16.5574	16.136	15.5275	15.6054	15.5845	15.6387	15.7491	15.7731	16.1662	15.8445	15.6081	15.9382	16.0712	15.8493	15.8892	15.522	15.9831	15.7321	15.3749	15.776	15.7751	15.9475	15.6182	15.862	16.6716	15.5536	1.24239	0.0361198	1.08204	0.252467
Q96TA2	ATP-dependent zinc metalloprotease YME1L1	YME1L1	86.454	773	17.289	17.7135	16.9278	17.2543	17.4084	17.1532	17.2039	17.2606	17.8945	16.9425	16.9582	17.1108	16.8596	17.2274	17.1399	16.9014	16.8932	17.3344	16.8714	17.2295	17.0913	16.9526	16.892	16.8963	16.8647	17.2054	16.883	16.8778	16.9494	16.8866	17.1828	16.9775	16.6341	17.1011	16.7565	16.948	17.1855	16.8325	16.8609	16.8386	1.19101	0.0361391	1.17923	0.00155657
Q9ULA0	Aspartyl aminopeptidase	DNPEP	53.41	485	17.3759	17.5737	17.7839	17.3757	17.8993	17.4052	17.5507	17.5966	17.3907	18.012	17.9287	17.8967	17.8188	17.7395	18.2458	17.6666	17.4486	17.596	17.9566	17.9736	17.8967	17.5821	17.8015	17.907	17.9431	17.8891	17.9602	17.8272	17.8722	17.8071	17.8147	17.8645	17.6953	17.966	17.3613	17.914	17.9232	17.6511	17.7718	17.5235	0.852204	0.0363747	0.941577	0.201257
Q13683	Integrin alpha-7	ITGA7	128.95	1181	16.7538	16.4479	16.9158	16.8001	16.8362	16.6425	16.4577	16.7373	17.0319	17.133	17.4347	16.827	16.9171	17.1438	17.0171	16.5539	17.5312	16.7735	17.5283	16.9177	17.2492	17.2759	17.0992	17.8244	18.003	16.8765	17.881	17.142	17.4424	17.6795	17.295	17.2458	17.6187	17.3635	17.6306	17.1615	17.2005	17.9991	17.2052	17.9397	0.818576	0.0364088	0.689397	7.41485e-06
P02748	Complement component C9	C9	63.173	559	17.7043	17.3406	18.6699	17.8948	18.0364	17.5635	17.8233	17.9393	17.6331	18.6258	19.3236	18.5421	17.9279	19.5042	18.2846	17.5585	18.2435	18.0832	19.3209	18.1211	18.6129	18.0029	18.6071	19.2247	18.638	17.8215	18.2708	19.0091	18.7788	18.4909	18.2138	18.114	17.8506	18.8869	18.1613	18.3962	18.2478	18.475	18.9164	18.2135	0.674623	0.0364392	0.846999	0.150894
Q9NVS2	28S ribosomal protein S18a, mitochondrial	MRPS18A	22.184	196	12.0979	13.3733	12.1725	12.3306	12.5757	12.6355	12.6613	12.6913	12.1	12.669	12.4083	11.7826	12.2422	11.746	12.2335	12.8398	11.9626	12.1205	11.6768	12.4876	12.3285	12.3526	12.1916	12.4627	12.3569	12.4773	12.1884	12.3359	12.142	12.5749	12.5769	12.1075	11.9664	12.7854	12.8113	12.9622	12.3306	11.489	12.618	11.5979	1.30199	0.0365278	1.00525	0.951836
Q9NRF8	CTP synthase 2	CTPS2	65.677	586	17.475	17.9548	17.9738	17.4201	17.7508	17.856	17.6393	17.4977	17.6292	17.773	18.1742	17.9749	17.7396	17.8265	18.1636	17.5784	17.6243	17.8165	18.193	18.0358	17.9003	17.6879	18.0263	17.8835	18.1746	18.2171	18.0806	18.1519	18.2938	17.6096	17.9284	17.939	17.9722	17.8065	17.5268	17.8798	17.9984	18.055	17.6629	18.1077	0.861115	0.0365726	0.90734	0.0530011
Q6IC98	GRAM domain-containing protein 4	GRAMD4	66.407	578	15.9944	16.8443	15.9385	16.4749	16.3857	15.9664	16.0597	16.3919	16.2738	15.5608	15.8236	15.8824	15.6996	15.6674	15.6496	15.993	16.4653	16.046	15.5924	15.9149	15.9141	15.9934	16.2236	15.8007	15.434	15.8196	15.9133	16.0704	16.1219	15.8616	16.0597	15.9162	15.6496	15.9934	16.5069	15.5899	15.8564	16.1888	15.874	15.7195	1.24456	0.0366783	1.07615	0.266712
O75822	Eukaryotic translation initiation factor 3 subunit J	EIF3J	29.062	258	16.9312	16.6645	15.8135	16.9788	16.2082	16.6792	16.2462	16.4173	16.2454	15.7069	15.6171	16.6591	15.8254	15.6809	16.0217	16.0763	15.9242	16.4821	15.6971	15.982	15.9467	15.9409	15.7818	15.6852	15.7195	16.0395	16.4822	15.8473	15.8026	15.5761	15.8828	15.9157	15.6741	15.8634	15.3855	15.7274	15.6503	15.6882	16.0275	15.8623	1.3127	0.0366829	1.29049	0.00155466
P02461	Collagen alpha-1(III) chain	COL3A1	138.56	1466	19.1645	18.2724	19.1089	18.5911	18.6345	18.1731	19.41	18.8353	18.3101	18.7158	19.4565	19.4263	19.3685	18.7427	18.8819	18.5268	19.6808	18.5599	19.5633	19.254	18.4193	18.702	19.0199	18.739	18.8943	18.6788	19.1001	18.2289	18.3092	19.109	18.5509	18.8042	19.2646	18.2272	18.2896	18.1788	18.8674	18.7619	18.2689	19.1265	0.745103	0.0367157	1.19483	0.0553641
P14866	Heterogeneous nuclear ribonucleoprotein L	HNRNPL	64.132	589	20.224	20.3171	19.9805	20.2646	19.8591	20.3363	20.3362	20.3058	20.0782	19.7833	19.5321	19.8144	20.1919	19.6574	19.9533	20.5278	19.7307	20.0419	19.4285	19.8509	19.7842	20.3565	19.9869	19.6158	19.4529	19.8722	19.4971	19.6447	19.6292	19.5443	19.9045	19.8102	19.9581	19.7502	19.1982	19.7804	19.7378	19.7981	19.8126	19.4356	1.21052	0.0367227	1.21606	0.00244906
P16112	Aggrecan core protein	ACAN	261.33	2530	18.3469	17.6085	18.2073	18.3467	18.4467	18.2321	17.6987	17.784	18.2049	17.9558	21.7174	19.0779	17.8382	18.4189	18.6105	18.1651	18.4699	18.9726	21.8334	18.2198	18.6344	18.6595	18.4575	18.3928	18.3351	18.4432	20.3556	18.428	17.8621	18.9403	18.2117	17.9397	18.1462	18.505	18.4304	18.1283	18.4982	19.0477	18.302	19.3004	0.483229	0.0367717	1.0402	0.842531
Q66K14	TBC1 domain family member 9B	TBC1D9B	140.52	1250	16.9536	16.9775	17.3282	16.961	17.2803	16.9491	17.0232	17.1414	17.0252	17.2696	17.1358	17.2056	17.1814	17.1069	17.4493	17.0262	17.6229	17.4165	17.1863	17.2663	17.3347	17.1686	17.1239	17.1204	17.0616	17.1763	16.7508	17.1087	17.0422	17.2384	17.3089	17.2583	17.2323	17.1885	16.7726	17.0164	17.3042	17.0667	17.096	16.9194	0.889579	0.0368348	1.04309	0.273229
Q9UDY2	Tight junction protein ZO-2	TJP2	133.96	1190	18.7512	18.5609	18.1579	19.0411	18.5797	18.309	18.4937	18.5257	18.7849	18.4407	18.3743	18.4414	18.2463	18.1824	18.0985	18.5407	18.3067	18.4435	18.4812	18.469	18.7023	18.5678	18.3047	18.4518	18.4242	18.1003	17.9801	18.4377	18.5314	17.9734	18.8338	18.6721	18.4129	18.5068	18.2889	18.1964	18.285	18.871	18.6168	18.1307	1.15356	0.0368436	1.03314	0.543926
Q9Y3B7	39S ribosomal protein L11, mitochondrial	MRPL11	20.683	192	16.8079	16.9716	16.7388	16.8306	17.1093	16.8848	16.9563	16.9329	16.9814	16.6646	16.405	16.8056	16.5566	16.8458	16.8704	17.1045	16.7135	16.6649	16.4711	16.6983	16.9312	17.1192	16.7862	16.658	16.6232	16.7579	16.8868	16.6034	16.607	16.4173	16.7862	16.7669	16.5202	16.8486	16.6811	16.8546	16.5774	16.4605	16.8066	16.7327	1.12837	0.0369004	1.0566	0.171856
Q13347	Eukaryotic translation initiation factor 3 subunit I	EIF3I	36.501	325	19.7759	19.6589	19.0486	19.6093	19.4317	19.5848	19.1885	19.2374	18.7452	19.2392	18.9203	19.1258	19.0836	18.9504	19.0361	19.4766	19.0335	19.3396	18.8869	19.0371	19.1486	19.1486	19.2228	19.0441	18.8886	19.2191	18.8033	19.1804	19.1271	19.0558	19.1486	19.0103	18.8945	19.2616	18.8446	18.9667	19.0938	18.9044	19.3065	18.7393	1.19994	0.0369031	1.12508	0.0269147
Q6P158	Putative ATP-dependent RNA helicase DHX57	DHX57	155.6	1386	15.6232	15.7955	15.7736	15.7408	15.6883	15.782	15.7217	15.7733	15.9467	15.9854	15.4095	15.7774	15.4374	15.4875	16.1017	15.6599	15.6485	15.5875	15.5562	15.5243	15.47	15.4007	15.7405	15.4141	15.6195	15.801	15.8449	15.3365	15.698	15.9728	15.384	15.4641	15.4095	15.4166	16.2561	15.4981	15.7784	15.4907	15.4329	15.2291	1.12043	0.036916	1.08533	0.0960035
P04080	Cystatin-B	CSTB	11.139	98	19.6137	18.7675	18.7162	19.6525	19.5841	19.0498	18.7275	18.5447	19.8874	18.3769	18.3669	19.1605	18.3714	18.5523	18.8771	19.18	18.6205	18.5092	18.3514	18.45	20.8177	19.8737	19.0443	19.4488	18.4986	18.7478	18.3983	20.15	19.7776	18.2383	19.3673	18.356	18.4558	19.9768	18.2176	18.3129	18.6769	18.8871	21.196	18.3552	1.36425	0.037041	0.828244	0.241852
Q9Y385	Ubiquitin-conjugating enzyme E2 J1	UBE2J1	35.198	318	14.9931	14.8284	15.3485	14.8274	14.824	14.9846	14.8854	14.8277	14.8103	15.5882	15.5478	14.9548	15.1343	16.1835	15.3766	14.8562	15.1556	15.1234	15.2233	15.9271	15.887	15.3612	14.8715	15.2274	15.4194	16.5445	15.261	15.4506	15.3868	15.5582	15.4154	15.1603	15.1658	15.3067	14.8232	15.2431	15.4291	15.5778	15.2094	15.4769	0.781062	0.0370506	0.8593	0.0729462
P43155	Carnitine O-acetyltransferase	CRAT	70.857	626	17.4466	16.958	17.956	17.0974	17.4643	17.3118	17.7374	17.3025	17.3154	17.7986	17.7967	17.6561	17.3459	18.1593	17.7431	17.6563	18.7972	17.3072	17.9842	17.7228	17.7357	17.5943	18.3818	18.1507	17.9989	17.7369	19.3557	18.0383	17.8213	17.893	18.0135	17.9917	18.0996	17.6911	19.7434	18.3258	18.0707	17.5052	18.259	18.8522	0.769467	0.0371108	0.69011	0.00156369
P09651	Heterogeneous nuclear ribonucleoprotein A1	HNRNPA1	38.746	372	20.2851	20.1599	19.6314	19.9751	19.4609	20.3004	19.6536	19.624	19.3957	19.8794	19.2977	19.296	19.8338	19.478	19.413	20.1198	19.4456	19.5654	18.9185	19.6762	19.2549	19.3391	19.2255	19.3175	19.187	19.2612	18.884	19.4836	19.4251	19.3712	19.4382	19.5547	19.4181	19.2341	18.8536	19.3398	19.2679	19.0176	19.3281	19.0186	1.2589	0.0371603	1.32821	6.96057e-05
Q63HR2	Tensin-2	TNS2	152.58	1409	15.8586	15.7747	16.3554	15.9049	15.9297	15.8378	16.0948	15.9743	16.0585	16.5664	16.7886	16.0013	16.8422	15.9785	16.2226	16.0052	16.234	16.1087	16.7813	16.4404	16.6375	16.5671	16.3786	16.7583	16.9738	16.3572	16.3916	16.3861	16.8112	16.8728	16.3892	16.4887	16.5479	16.8301	16.213	16.7171	16.5259	16.3511	16.4885	16.1501	0.809571	0.0372777	0.782477	0.000354052
P62277	40S ribosomal protein S13	RPS13	17.222	151	18.2357	17.5609	18.2478	18.7897	17.8373	17.9275	17.7495	17.7014	18.2282	17.8428	17.2518	17.3868	17.9255	17.8744	17.2201	18.3867	17.6559	17.3355	17.4898	17.8825	17.2873	17.4928	18.136	17.7445	17.7331	17.19	17.3971	17.5863	17.5863	17.4084	17.2343	17.8535	17.9142	17.4744	17.3648	17.4192	17.2211	17.464	17.6461	17.4873	1.2934	0.0372855	1.22642	0.00871886
P22234	Multifunctional protein ADE2	PAICS	47.079	425	20.2074	20.3715	19.7272	20.0695	19.8435	20.4287	19.299	19.7423	20.3013	19.3667	19.2398	19.9866	19.4972	19.5466	19.5733	19.9752	19.5146	19.7539	19.2524	19.6145	19.5115	19.415	19.6136	19.3892	19.1858	19.2739	19.2924	19.7399	19.6688	19.6262	19.3857	19.27	19.5961	19.308	19.5673	19.2076	19.2777	19.4095	19.5997	19.3044	1.26602	0.0373542	1.26001	0.000803573
Q9Y4W6	AFG3-like protein 2	AFG3L2	88.583	797	18.0208	18.5972	17.9793	18.0368	18.1127	18.5471	18.1753	18.112	18.0098	17.9454	17.7971	17.8804	18.2467	17.7127	17.8509	18.0023	18.236	18.026	17.7572	17.9213	17.9747	17.9747	18.0931	18.2859	17.9156	18.0756	18.8148	17.9973	17.9378	17.7924	18.1188	17.9411	17.8447	18.1524	19.1071	18.2892	18.0977	17.8464	18.4513	18.394	1.15716	0.0375119	0.928587	0.244948
P63104	14-3-3 protein zeta/delta	YWHAZ	27.745	245	21.1805	21.5178	20.8048	21.428	20.734	21.365	20.8073	20.5562	21.1944	20.3215	20.1571	20.4164	20.9562	20.9238	20.5002	20.9711	20.262	21.1233	20.3098	20.5156	20.3063	20.5002	20.5695	20.3615	20.2765	20.3752	19.784	20.5032	20.5848	20.0714	20.2514	20.4042	20.3632	20.5398	19.8496	20.2999	20.2999	20.4987	20.5974	19.871	1.299	0.0376038	1.4014	5.83478e-05
P62314	Small nuclear ribonucleoprotein Sm D1	SNRPD1	13.281	119	14.9885	15.2476	14.6912	14.6401	14.5495	15.3	14.7057	14.8085	14.8597	14.5778	14.5285	14.6605	14.6248	13.967	14.3429	15.1943	14.3395	14.6976	14.2435	14.7377	14.6284	14.7537	14.7291	14.586	14.454	14.7647	14.565	14.5191	14.6939	15.0983	14.8281	14.6637	14.5331	14.7773	14.4421	14.7534	14.7245	14.1465	14.7301	14.6958	1.2339	0.0376363	1.02166	0.720085
Q14161	ARF GTPase-activating protein GIT2	GIT2	84.542	759	18.1034	17.9851	18.3355	18.1049	18.3586	17.8745	18.3031	18.0762	18.0698	18.2844	18.1481	18.3344	18.2392	18.3535	18.3293	18.1761	18.4431	18.194	18.2156	18.4472	18.179	18.3514	18.2976	18.0593	18.024	18.3945	17.959	18.1451	18.1225	18.2009	18.092	18.3293	18.6397	18.1352	17.9802	18.164	18.477	18.309	17.9474	18.0028	0.908466	0.038098	1.01981	0.600894
Q14145	Kelch-like ECH-associated protein 1	KEAP1	69.666	624	16.1258	16.979	15.8018	16.3863	16.0588	16.4287	16.649	16.1692	16.5346	15.7098	15.8055	15.9109	15.8603	15.7338	16.0261	16.4237	15.7074	16.5097	15.5739	15.7918	16.2097	16.0793	15.9767	16.0614	15.6064	15.9987	15.8692	15.9899	16.0385	15.9304	16.0972	15.8893	15.8603	16.1276	17.1149	15.7641	15.9217	15.8758	16.5524	16.079	1.27456	0.0382546	1.04044	0.609491
O14558	Heat shock protein beta-6	HSPB6	17.135	160	15.8657	15.8013	15.8171	15.9133	15.8075	15.7506	15.5791	15.7229	15.8753	16.1794	16.3163	15.784	15.8507	15.8518	15.7423	15.9571	16.6556	16.0208	16.5978	16.1119	16.333	15.914	15.9099	16.6648	16.4051	15.8862	17.5688	16.4289	16.4091	16.5539	16.4142	16.6545	16.0096	16.5324	17.6756	16.2266	15.8243	17.3697	16.1617	17.277	0.836473	0.0382863	0.68257	0.000349451
P51114	Fragile X mental retardation syndrome-related protein 1	FXR1	69.72	621	17.8964	18.7132	17.7446	18.3335	17.7989	18.7019	18.2419	17.9555	18.2621	17.4508	17.5578	17.8585	17.7277	17.9041	17.809	18.0817	17.8922	17.8638	17.584	17.6868	17.4824	17.5491	17.7567	17.5541	17.5347	17.4855	17.9421	17.4675	17.5332	17.4782	17.4824	17.595	17.8862	17.3842	18.0595	17.4391	17.5426	17.7311	17.5012	17.8356	1.24259	0.0383042	1.2668	0.00040054
Q9H223	EH domain-containing protein 4	EHD4	61.174	541	19.0202	18.4743	18.945	19.1092	18.688	18.6239	18.4981	18.9059	18.4677	18.5858	18.263	18.7295	18.7221	18.3374	18.4036	18.4608	18.6255	18.6811	18.4409	18.5834	18.5135	19.0257	18.9586	18.6587	18.5097	18.4593	18.5505	18.582	18.7187	18.9672	18.5117	18.4855	18.7811	18.7138	18.3978	18.5167	18.9095	18.7688	18.5515	18.507	1.15436	0.038612	0.982078	0.697025
P07332	Tyrosine-protein kinase Fes/Fps	FES	93.495	822	17.5556	17.4559	17.9453	17.6264	17.832	17.3471	17.5079	17.7478	18.0213	18.0688	17.9385	18.1713	17.8048	18.999	18.1869	17.5181	18.261	17.5536	17.9842	18.1464	17.8767	17.8394	17.8879	17.9351	17.8727	17.8278	17.8612	17.9297	17.759	18.5317	17.9427	18.0255	18.0037	17.7503	17.6378	17.9842	18.4568	18.3706	17.7817	18.1982	0.787002	0.038622	0.939494	0.376112
Q9NWU2	Glucose-induced degradation protein 8 homolog	GID8	26.748	228	16.1022	16.433	16.4108	16.3768	16.0866	16.4859	16.4683	16.6012	16.6968	15.9032	15.9404	16.1484	16.4364	16.1542	16.0334	16.2321	16.0231	16.1927	16.2531	16.1402	16.0618	16.3202	16.5614	16.2542	16.2602	16.0856	15.8884	16.4502	16.4238	15.8336	15.8179	16.1902	16.3062	16.3426	16.5971	16.2061	16.0107	16.629	16.5439	15.8534	1.14957	0.0387065	1.01685	0.75503
Q9Y4Z0	U6 snRNA-associated Sm-like protein LSm4	LSM4	15.35	139	16.7986	16.8928	16.9551	16.2688	16.6648	16.6947	16.6526	16.7988	17.2369	16.5913	16.2758	16.6369	16.475	16.3272	16.5243	17.0633	16.2748	16.4384	16.4054	16.6788	16.4741	16.5739	16.9508	16.6206	16.7062	16.4085	16.0688	16.3079	16.588	16.2541	16.6305	16.39	16.3364	16.5462	15.9643	16.7889	16.3316	16.3522	16.7178	16.1188	1.18546	0.0388763	1.12993	0.0394044
P18428	Lipopolysaccharide-binding protein	LBP	53.383	481	15.698	15.4948	16.5348	15.7332	15.7738	15.7134	15.8467	15.7865	15.3354	16.0098	16.733	15.7566	15.8909	16.257	15.9006	15.5122	16.494	15.9424	17.0118	16.4446	16.5522	16.1162	16.4493	16.8277	16.1936	15.9655	16.0438	16.6586	16.3809	16.3775	16.0326	16.2188	16.0425	17.1001	16.1487	16.2074	16.6461	16.7178	16.5416	16.418	0.756964	0.0390426	0.763934	0.00259211
P62241	40S ribosomal protein S8	RPS8	24.205	208	18.9089	18.9107	18.3856	18.7102	18.4037	18.6673	18.8905	18.5984	18.3793	18.6844	18.414	18.6035	18.4462	18.1427	18.4911	18.6174	18.5402	18.4408	18.3892	18.6428	18.4416	18.5751	18.3771	18.498	18.4758	18.5445	18.2193	18.5268	18.5113	18.5603	18.4988	18.4099	18.5034	18.5484	18.531	18.4603	18.3751	18.9531	18.7102	18.4093	1.13377	0.0392282	1.04021	0.309106
P02766	Transthyretin	TTR	15.887	147	17.1234	17.2202	17.7006	17.2209	17.5603	17.262	17.2456	17.0606	16.794	17.8277	17.7961	17.6646	17.6251	17.8233	17.7244	17.0448	17.641	17.4014	17.6619	17.379	18.0598	17.8056	17.5869	18.1856	18.086	18.0925	17.9137	18.2995	18.1641	18.2255	18.0286	18.2115	18.4194	17.7266	17.4487	17.7667	17.9412	18.673	17.5023	17.7995	0.826666	0.0392374	0.679252	1.27864e-06
O75787	Renin receptor	ATP6AP2	39.008	350	16.3165	16.5856	15.8235	16.345	16.666	16.5035	16.9669	16.8819	17.0417	15.8556	15.939	16.3085	15.9022	16.2442	16.5654	16.1378	16.3259	16.2089	15.7092	16.1967	16.2122	16.1845	15.7039	16.5381	15.6942	16.2728	15.6296	16.0551	16.1947	15.9837	16.2249	16.0397	15.8742	16.0568	17.636	15.6667	16.2089	16.4531	17.3115	15.5087	1.27002	0.0392775	1.11243	0.297213
Q9Y4G6	Talin-2	TLN2	271.61	2542	18.5007	18.0819	18.3905	18.307	18.4543	18.5058	18.5125	18.1847	18.8259	18.6474	18.6185	18.9713	18.9125	18.585	18.7149	18.3933	18.8161	18.2904	18.981	18.4363	18.4388	18.6228	18.5971	18.6884	18.6943	18.4861	19.1012	18.4516	18.6422	18.9419	18.2685	18.7387	19.152	18.4557	18.7725	18.6	18.595	19.2753	18.4924	19.1943	0.852128	0.0395424	0.898793	0.0782538
O95715	C-X-C motif chemokine 14	CXCL14	13.077	111	15.7662	14.5752	15.6951	16.0709	14.7448	15.0412	15.4568	15.4405	16.8815	14.7192	15.4314	17.1359	15.9731	15.9731	18.7765	16.5316	15.2601	17.2083	16.1719	15.1647	14.9549	14.5838	14.732	14.4204	14.3622	15.067	15.7096	14.86	14.69	14.3663	14.5101	14.6625	14.8445	14.4191	12.3023	15.1733	15.3804	14.6395	14.7643	16.099	0.527235	0.0395529	2.2561	0.000163794
Q2TAZ0	Autophagy-related protein 2 homolog A	ATG2A	212.86	1938	14.4592	14.2807	13.9628	14.8148	14.6292	14.2039	13.945	13.7007	14.0359	14.1371	13.9516	14.0919	13.9252	13.7005	13.9033	14.0559	13.934	14.1946	13.8222	14.0218	14.2097	14.069	13.8669	13.9239	13.6957	13.966	13.6812	13.9227	13.7617	14.5808	14.2509	14.0919	13.928	14.2653	13.7074	13.7984	14.0094	14.0708	13.9318	14.1245	1.19483	0.0400169	1.06859	0.245923
Q6ZMZ3	Nesprin-3	SYNE3	112.22	975	18.0351	17.8361	18.6597	18.2032	18.5004	17.9735	18.3294	18.1727	18.5194	18.3575	19.1731	18.3364	18.7569	18.3861	18.5164	18.2007	18.5004	18.2045	18.6802	18.5788	18.4355	18.5901	18.7234	18.91	18.6445	18.6589	18.3501	18.5386	18.7445	19.2866	18.5559	18.8083	18.9907	18.6008	18.2648	18.8331	18.9446	18.9173	18.4719	18.4648	0.826651	0.040036	0.817504	0.00205969
O43765	Small glutamine-rich tetratricopeptide repeat-containing protein alpha	SGTA	34.063	313	16.9263	16.8871	17.1378	16.9972	16.6629	17.3607	17.0345	16.7232	17.027	16.9742	16.8024	16.1384	16.9162	16.7365	16.4242	16.9586	16.8651	16.9065	16.9443	16.7266	16.7533	16.4025	16.6256	16.5497	16.5329	16.7315	16.653	16.8009	16.7258	16.1185	16.8185	16.9816	17.0887	17.4676	16.4896	16.4424	16.4883	16.8852	16.7384	16.6047	1.17381	0.0400842	1.11926	0.0651204
Q9HAS0	Protein Njmu-R1	C17orf75	44.621	396	15.5766	15.8403	15.803	15.5136	15.8044	15.611	15.9593	15.7081	16.0836	16.2628	16.2292	16.126	15.7004	15.9399	16.4594	15.7104	16.063	15.9854	16.2043	16.0496	15.6444	15.6682	15.862	15.6758	15.9479	15.9324	15.559	15.711	15.6453	15.8837	15.6784	16.0123	15.8965	15.8486	15.95	15.8731	15.9188	16.0791	15.6781	15.6462	0.852335	0.0402314	1.09124	0.0650454
P02538	Keratin, type II cytoskeletal 6A	KRT6A	60.044	564	24.1137	24.8139	22.2226	24.7225	24.208	23.8351	23.4899	22.7641	23.7956	21.5598	21.8112	22.5583	22.3	22.8452	23.0282	23.2354	22.3494	23.8351	22.0237	22.9667	22.4708	23.5284	22.0449	21.8739	21.8474	22.3066	21.3357	21.8208	22.4313	21.9169	22.3512	22.1862	22.114	22.3512	21.4588	21.8226	22.4538	22.7724	22.4538	21.5223	1.81151	0.0402565	1.95986	0.000251646
P05543	Thyroxine-binding globulin	SERPINA7	46.324	415	16.3337	16.0218	16.7946	16.5381	16.4601	16.3842	16.4757	16.4223	16.3246	17.2014	17.2531	16.4315	17.1229	18.0131	16.8541	16.2739	16.6745	16.4482	17.1867	16.8976	17.3277	16.8756	16.9694	17.7519	17.3134	17.0004	16.9218	17.5018	17.6647	17.6259	17.0875	16.7066	16.9552	17.2996	16.9944	17.2275	16.8418	17.4993	17.5726	16.8255	0.74747	0.0403298	0.710785	0.000392382
P08294	Extracellular superoxide dismutase [Cu-Zn]	SOD3	25.851	240	13.7885	14.2031	14.2489	14.1101	13.9738	13.9606	14.7686	14.4113	13.4773	14.6743	15.893	14.2234	14.9678	14.1453	14.1808	14.1835	14.6406	14.2273	15.8804	14.7729	14.0099	14.9218	14.3368	14.6507	15.0552	14.2231	14.3376	14.8332	15.5602	15.0676	14.5814	14.5197	14.8127	15.0735	14.7766	14.9808	14.1857	15.4424	15.1315	13.7438	0.683091	0.0404304	0.826084	0.118631
P50991	T-complex protein 1 subunit delta	CCT4	57.924	539	20.3053	20.296	19.9286	20.338	19.8946	20.1706	19.946	20.1919	19.5264	19.631	19.4912	19.7921	19.7309	19.4674	19.7341	20.2045	19.8871	19.9607	19.6047	19.8299	19.5775	19.8379	19.8299	19.6776	19.6424	19.5252	19.5468	19.8961	19.6753	19.551	19.607	19.5827	19.7724	19.5612	19.8115	19.6424	19.6346	19.5986	19.7544	19.7096	1.19134	0.0404505	1.16864	0.00193311
Q9BZG1	Ras-related protein Rab-34	RAB34	29.044	259	16.2427	15.9808	16.6133	16.5085	16.2054	16.6816	16.6699	16.4047	16.5719	16.4862	16.4283	17.0536	16.5683	17.4392	17.2052	16.1825	16.8065	16.4772	16.9082	16.4829	16.4798	16.5188	16.7577	16.2763	16.6115	16.2951	17.1578	16.4256	16.7286	16.8272	16.3484	16.5103	16.3966	16.636	16.8616	16.4439	16.4735	17.9785	16.134	16.6057	0.801797	0.0406048	0.981114	0.81823
Q13247	Serine/arginine-rich splicing factor 6	SRSF6	39.586	344	15.8693	16.3792	14.6688	16.006	15.6035	15.7396	15.649	16.1846	15.7094	15.2438	14.8366	15.3079	15.2918	13.8943	15.0128	16.2755	14.8362	15.8958	14.6548	15.3347	15.3138	15.0792	14.5046	14.5523	14.5032	14.761	14.522	15.1246	15.1106	14.4471	15.5942	15.3404	14.547	15.2988	14.2285	14.9757	14.9678	14.2427	14.7579	14.3269	1.48585	0.0406849	1.52603	0.000868109
O43464	Serine protease HTRA2, mitochondrial	HTRA2	48.84	458	17.3757	17.5981	18.2596	17.7668	17.6821	17.7884	17.741	17.8174	18.3244	17.9255	18.4894	17.7433	17.894	18.3758	18.002	17.7442	18.2191	18.0952	18.7798	18.0029	18.1385	17.6446	18.011	17.9567	17.9884	17.8897	17.9596	17.6498	17.8377	17.9695	17.9905	17.9514	17.8479	18.037	17.9442	17.5898	18.035	18.0009	17.7206	18.8652	0.80851	0.0407272	1.02089	0.757745
P23528	Cofilin-1	CFL1	18.502	166	21.0823	20.616	20.9406	21.6106	20.8473	20.5986	21.2009	20.9688	20.2203	20.3674	20.4751	20.4023	20.9406	20.4873	19.9945	20.6867	20.6612	20.7558	20.2609	20.3502	20.1636	20.5738	20.662	20.1846	20.3059	20.3943	20.2791	20.3386	20.3081	19.992	20.3376	20.4023	20.5882	20.1825	19.9137	20.4714	20.612	20.222	20.2271	20.1605	1.26913	0.0408052	1.28112	0.000670435
Q14160	Protein scribble homolog	SCRIB	174.91	1630	18.1845	18.5949	18.3837	18.921	19.2949	18.9864	18.6697	18.6166	19.1868	18.5027	18.4258	18.3416	18.43	18.8168	18.0903	17.988	18.4397	18.6255	18.5195	18.6424	18.5754	18.5342	18.5126	18.7625	18.3718	18.3788	18.3471	18.575	18.7119	18.6902	18.578	18.6868	18.5342	18.5623	20.0211	18.4283	18.4655	18.694	19.1524	18.4318	1.23299	0.0408845	0.954194	0.548614
P07197	Neurofilament medium polypeptide	NEFM	102.47	916	14.6109	14.5576	15.0929	15.5483	15.1161	14.6413	15.1491	15.0228	15.5184	15.4418	17.2366	15.2617	15.3495	15.3521	15.5183	14.802	15.0489	15.422	16.519	15.8985	14.9827	15.9549	15.6502	16.9515	16.4703	15.3226	15.3593	15.6097	17.1631	15.3647	15.5112	16.2055	15.1626	16.096	16.3013	15.3908	15.2341	14.9607	15.4731	15.2492	0.673179	0.0409275	0.776317	0.0751382
Q9NUQ8	ATP-binding cassette sub-family F member 3	ABCF3	79.744	709	17.5255	17.9386	17.0712	17.8427	17.5728	18.2079	17.59	17.7876	17.6266	17.4012	17.1928	17.5383	17.2825	16.8159	17.3877	17.5781	17.1993	17.9227	17.1326	17.4931	17.4292	18.0822	17.1014	16.9353	16.9719	17.3465	16.8584	17.3822	17.3655	17.2222	17.353	17.2681	17.3326	17.35	16.8908	17.0216	17.1569	17.2549	17.252	16.82	1.23293	0.0409726	1.21893	0.00595963
P60953	Cell division control protein 42 homolog	CDC42	21.258	191	17.5707	17.2818	17.5176	17.776	17.4645	17.4882	17.4485	17.6967	17.0056	17.6125	17.1515	17.2082	17.6332	17.2668	16.9319	17.5523	17.152	17.4734	17.1907	17.1746	16.9322	17.4248	17.5839	17.1253	17.2586	16.9403	16.9409	17.2185	17.2825	17.2213	17.0418	17.1966	17.1676	17.2093	17.2668	17.3148	17.0518	16.7946	17.3108	16.9618	1.1589	0.0410714	1.16282	0.00278457
P09917	Arachidonate 5-lipoxygenase	ALOX5	77.982	674	17.2077	17.4757	17.8137	17.3881	17.8782	17.3254	17.5658	17.6784	17.3681	17.6024	17.7156	17.5826	17.9371	18.5158	17.9822	17.6896	17.8826	17.436	17.4304	17.8059	17.8013	17.6531	17.8523	17.6854	17.7165	17.9044	17.6533	17.9364	17.7519	18.1154	17.6487	17.791	18.0054	17.719	17.5166	17.8687	18.404	17.7768	17.3847	17.7625	0.830794	0.041262	0.911743	0.114188
Q96JQ2	Calmin	CLMN	111.65	1002	16.5942	16.3304	17.1828	16.6483	16.4704	16.3598	16.4025	16.7763	17.1564	17.0131	17.3825	17.0727	16.7093	17.9537	16.9607	16.9244	16.6453	16.5284	17.0497	17.4553	16.9578	17.6157	17.2264	17.0497	17.6467	17.0285	16.9544	17.025	16.8732	17.6732	17.4378	16.9993	16.9204	16.8509	16.7531	17.9255	17.4431	16.8226	16.7927	17.102	0.771217	0.0412661	0.826969	0.0295546
Q12904	Aminoacyl tRNA synthase complex-interacting multifunctional protein 1	AIMP1	34.352	312	19.3648	19.1445	19.2809	19.4042	19.1792	19.6384	19.3195	19.4887	19.2807	19.3421	19.1817	19.301	18.951	18.6272	19.0745	19.4867	19.0501	19.5083	19.0588	19.1476	19.3079	19.167	19.2682	18.9996	18.9904	19.1234	18.8976	18.9827	19.05	18.6314	19.5066	19.2891	18.9833	19.1231	18.5046	19.2664	19.172	18.371	19.1133	18.9043	1.15316	0.0413875	1.15581	0.0132672
P10155	60 kDa SS-A/Ro ribonucleoprotein	TROVE2	60.67	538	18.338	18.3943	18.2706	18.1304	18.4462	18.5969	18.197	18.1836	18.5023	18.2793	18.2012	18.1573	18.1961	17.9586	18.3438	18.243	18.0998	18.3217	18.1533	18.3328	18.1948	18.1651	18.4179	18.1605	18.191	18.3331	18.0345	18.2003	18.2987	18.1773	18.2652	18.0827	18.4808	18.1385	17.9133	18.1946	18.3358	18.2021	18.1152	17.9909	1.09665	0.0414828	1.05169	0.116086
P61158	Actin-related protein 3	ACTR3	47.371	418	19.7692	20.0484	19.8713	19.7447	19.7909	19.955	20.1609	20.3248	19.6705	19.6165	19.7181	19.255	19.9515	19.6732	19.4674	19.944	19.7137	19.7492	19.5635	19.7721	19.9891	20.1308	19.6494	19.7747	19.4729	20.0692	19.1792	19.9376	19.9459	19.4233	20.1133	19.6014	19.8473	20.0256	18.965	19.5976	20.1498	19.6929	19.739	19.1579	1.16026	0.0415171	1.04601	0.494563
Q8IVD9	NudC domain-containing protein 3	NUDCD3	40.822	361	15.1572	14.7112	14.7285	14.889	14.3629	14.6272	15.1552	14.8226	15.0793	14.7028	15.1495	15.0785	15.1664	15.1884	15.0093	14.7994	15.0397	15.0476	15.0634	14.7345	15.3603	14.9828	14.8399	15.3063	15.2512	15.0634	15.1178	14.7613	14.7646	15.0687	14.7838	14.831	14.8328	14.8018	14.724	14.9398	15.0463	15.3977	15.0437	15.3209	0.868088	0.0418331	0.941949	0.232464
Q06828	Fibromodulin	FMOD	43.178	376	18.7175	18.1646	19.0763	18.9814	18.2691	17.7715	18.408	18.4877	18.4761	18.6692	19.8936	19.8402	18.6595	18.4588	18.7878	18.8877	18.8733	18.4161	20.5054	18.4449	18.9436	18.1828	18.8368	18.5999	18.6155	18.4143	19.1728	18.4459	18.3954	18.9175	18.4869	18.5867	18.7754	18.3855	17.8579	18.2009	18.7816	18.8074	18.3879	19.4064	0.671472	0.0418338	1.13239	0.282462
O43504	Ragulator complex protein LAMTOR5	LAMTOR5	9.6138	91	17.3776	17.4753	17.0736	17.3394	16.8279	17.3382	17.1493	17.569	17.2668	17.0154	16.709	16.5251	17.0482	17.0389	16.619	17.3332	17.0416	17.4441	17.0595	17.0497	16.6771	17.2836	16.6614	16.8829	17.0211	16.4608	16.9383	16.9691	16.9877	16.7228	16.9003	16.975	16.5854	17.1088	16.8441	17.29	16.5457	16.6776	17.1259	16.7154	1.1945	0.0418405	1.18624	0.00511026
P43403	Tyrosine-protein kinase ZAP-70	ZAP70	69.872	619	13.982	14.6439	14.5601	14.6834	14.7537	14.3817	13.9504	14.0577	14.529	14.2316	14.667	15.2023	15.2948	14.5907	14.3703	14.6139	15.0358	14.4955	14.3531	14.3672	14.9801	14.4564	14.4148	14.3786	14.5337	15.4343	14.6581	14.8755	14.2316	15.0282	14.8302	14.9875	15.3588	14.8813	14.5644	14.8252	14.9658	15.0818	14.1853	15.5716	0.800117	0.0421043	0.82705	0.025857
P22532	Small proline-rich protein 2D	SPRR2D	7.9053	72	19.4652	17.0695	16.6184	18.5051	18.7751	17.9153	17.729	16.133	18.0225	15.8024	16.4525	16.842	16.3555	17.1646	17.3674	17.1268	16.6478	16.2881	16.5314	16.6929	16.1989	16.8974	16.5311	16.3476	16.1851	16.2118	16.3953	15.9443	15.9013	16.2762	15.891	16.2818	16.342	16.2107	16.0855	15.9128	16.2261	16.3542	16.367	16.3705	1.81084	0.0422915	1.90356	0.000154636
Q9NUJ3	T-complex protein 11-like protein 1	TCP11L1	57.034	509	16.7799	16.5196	16.6829	16.6951	16.6798	16.3574	16.834	16.733	16.6281	16.6843	16.6274	16.8136	16.7061	17.0893	16.7664	16.6021	16.9138	16.9295	16.868	16.6876	16.6707	16.8285	16.5932	16.6807	16.7162	16.7718	16.4781	16.5311	16.6041	17.19	16.5822	16.6908	16.6793	16.5177	17.119	16.6553	16.9014	16.8497	16.5519	16.7378	0.906895	0.0423615	1.00865	0.821897
Q9H0F7	ADP-ribosylation factor-like protein 6	ARL6	21.097	186	14.6149	14.6973	14.9275	14.4458	14.7589	14.6951	14.9013	14.8781	15.0869	15.0726	15.2924	15.1884	15.0959	14.816	15.1097	15.3952	14.8318	14.7558	15.118	14.6686	15.0723	14.7901	14.9712	14.8601	15.1734	15.0819	14.5389	15.0905	15.3144	15.2334	15.174	15.1353	15.5262	14.8307	14.6988	15.232	15.0698	15.341	14.7979	14.559	0.858964	0.0424821	0.928492	0.192419
P30613	Pyruvate kinase PKLR	PKLR	61.829	574	14.9366	14.7984	14.7279	14.9331	14.9706	14.8949	15.016	14.966	15.2028	15.0732	15.7766	14.8019	15.2403	15.0286	15.0166	14.9791	15.2401	14.9214	15.4823	15.2344	15.4936	14.989	14.5518	15.3599	15.3421	15.383	15.4376	15.5181	15.3206	16.0462	15.1801	15.8807	15.91	15.1786	15.4374	15.1772	15.2118	16.2245	15.4481	15.9592	0.858463	0.0426198	0.76289	0.000584956
P00740	Coagulation factor IX	F9	51.778	461	16.5747	16.0615	16.9539	16.2595	16.6008	16.1368	16.5871	16.8634	16.4752	17.5886	17.2301	17.3834	17.1948	17.4086	17.6815	16.4164	16.7621	16.2861	17.3442	16.8187	16.9821	16.5731	16.7953	17.3969	17.7147	16.7666	17.0581	16.6941	17.0882	16.5569	16.4886	16.8858	16.6261	16.7401	16.5529	17.2633	16.9626	17.077	17.1526	17.3361	0.735889	0.0427883	0.930331	0.43911
P11172	Uridine 5-monophosphate synthase	UMPS	52.221	480	17.7158	18.0645	17.9914	18.0637	17.7454	17.638	17.7351	17.7908	17.8009	17.6619	17.4804	17.6764	17.7836	17.4987	17.8021	18	17.6547	17.5695	17.5932	17.5943	17.6335	17.4128	17.7052	17.5455	17.516	17.691	17.3312	17.9274	17.8409	17.7189	17.6663	17.8471	18.0773	17.5843	17.8387	17.4284	17.6555	17.8925	17.5328	17.2666	1.11378	0.0428033	1.06247	0.160596
Q9Y613	FH1/FH2 domain-containing protein 1	FHOD1	126.55	1164	16.4939	16.1584	16.4377	16.3976	16.2843	16.1556	16.2536	16.2875	16.1982	16.2177	16.3951	16.619	16.3141	16.316	16.3338	16.338	16.8983	17.2477	16.3191	16.4276	16.4114	16.6119	16.2998	16.4338	16.3505	16.6263	17.194	16.4716	16.4192	16.5865	16.3956	16.477	16.764	16.3991	17.5485	16.2242	16.7255	16.8239	16.4095	17.3502	0.85119	0.0428608	0.8577	0.0313447
P07585	Decorin	DCN	39.746	359	19.3924	19.3226	20.6381	19.7304	19.7739	19.3406	19.7125	19.6647	19.878	20.2308	20.4258	19.6885	20.7831	20.4553	19.5944	19.8451	20.3299	19.5605	20.9815	20.5415	20.7025	20.7173	20.2718	21.3034	20.5863	20.3782	20.2052	20.8368	21.1339	21.4558	20.6525	21.0892	20.8625	21.0556	20.1977	20.3519	20.3959	21.4271	20.6276	20.1978	0.73094	0.0429723	0.603753	1.4381e-05
Q02952	A-kinase anchor protein 12	AKAP12	191.48	1782	18.5783	18.6093	18.885	18.765	18.5954	18.9347	18.8905	18.5845	18.4664	19.0554	18.9082	18.6526	19.9276	19.0343	18.7891	18.9666	18.6276	19.5347	18.8705	19.1536	19.0343	19.5828	18.8365	19.0952	19.3288	19.0499	19.1855	18.8876	19.5988	19.4628	19.1012	19.5149	18.7891	19.2205	18.8042	19.4012	18.6545	19.4532	19.0023	18.9337	0.806625	0.0429891	0.837769	0.0157456
Q92520	Protein FAM3C	FAM3C	24.68	227	17.2152	17.2575	17.1279	16.7506	16.8125	17.0125	17.3137	17.1763	16.5576	17.2759	17.2499	16.6207	16.8027	16.5638	16.3127	16.7733	16.6269	16.7589	16.8928	17.229	16.8626	16.803	17.0643	17.0536	17.2553	17.2542	16.5856	16.5173	16.5411	16.526	17.1966	16.92	16.386	17.1216	17.2295	17.4003	16.8389	16.5149	17.2542	16.3483	1.20322	0.0430408	1.02303	0.746674
O94855	Protein transport protein Sec24D	SEC24D	113.01	1032	15.9982	15.9315	16.3083	15.9444	15.9473	15.7209	16.2192	15.9302	15.9041	16.5369	16.2952	16.2941	16.6038	16.1641	16.2699	15.918	16.3273	15.9875	16.515	16.2491	16.1404	15.9547	16.1667	16.0596	16.4164	16.3978	16.0137	16.1832	16.1401	16.7046	15.9418	16.3486	16.5704	15.8839	16.0861	16.3399	16.2014	16.019	15.7747	16.1249	0.859578	0.0430421	0.986124	0.791109
P05387	60S acidic ribosomal protein P2	RPLP2	11.665	115	19.3261	19.0974	19.1822	19.5213	19.3629	19.0393	19.1199	19.0249	18.9351	18.9339	18.7279	19.2232	18.7964	18.5486	19.2123	19.0946	18.7972	18.8472	18.8135	19.2958	18.9577	18.8313	19.154	18.9481	18.723	18.962	18.4751	18.8598	18.7512	18.7881	18.8447	19.0166	19.1107	18.8685	18.2799	18.7341	18.8899	18.888	18.9709	18.3213	1.16364	0.0430436	1.16979	0.00470083
Q15904	V-type proton ATPase subunit S1	ATP6AP1	52.025	470	15.8695	15.9734	15.7309	15.7473	15.1003	15.6589	15.8779	15.6259	15.6656	15.8537	15.5203	15.6267	15.4811	15.2169	15.4379	15.607	15.5887	15.5813	15.6944	15.4397	15.5677	15.6118	15.7758	15.6258	15.6185	15.5713	15.4366	15.3991	15.4976	15.4669	15.5242	15.3687	15.5135	15.5498	15.6696	15.4654	15.4886	15.9912	15.7347	15.7312	1.1415	0.043161	1.02418	0.557619
Q92665	28S ribosomal protein S31, mitochondrial	MRPS31	45.318	395	16.517	16.6624	16.0992	16.174	16.6491	16.2565	15.9912	16.3978	16.4037	15.9441	15.8421	16.4271	15.7479	15.5892	16.3664	16.2352	16.1602	16.1157	16.2212	15.6526	16.2978	16.3548	16.1875	15.9857	16.0635	16.447	17.1516	16.3122	15.9529	15.8099	16.5565	15.9041	15.6989	16.2819	16.5386	16.6134	16.2352	15.5971	16.263	17.3091	1.20893	0.0431662	0.929536	0.378801
Q9NZ09	Ubiquitin-associated protein 1	UBAP1	55.083	502	15.6349	15.3242	15.5648	15.8148	15.5543	15.1452	15.5918	15.3904	15.4754	14.8991	14.8938	15.3309	15.4941	15.5732	15.0448	14.9693	15.111	15.2478	15.1687	15.2108	14.977	15.2489	15.6021	15.4388	15.3157	15.2862	15.3185	15.8381	15.5211	15.0073	14.9372	15.1579	15.1694	15.1694	15.553	15.4583	14.9844	15.4491	15.4491	14.883	1.17695	0.0432721	1.02366	0.683377
Q14919	Dr1-associated corepressor	DRAP1	22.35	205	15.7742	15.6953	15.9395	16.3041	16.0177	15.8063	15.9238	15.6227	15.3161	15.4691	14.9861	15.2495	15.4857	15.6773	14.969	16.2602	15.4603	15.916	14.8119	15.4065	15.1617	15.2324	15.508	14.9397	15.1483	15.1111	15.0411	15.7118	15.6531	14.7289	15.3273	15.2137	15.3639	16.005	15.6626	15.4214	15.0002	14.3528	15.3496	14.9216	1.28753	0.0434604	1.28508	0.00597582
P42694	Probable helicase with zinc finger domain	HELZ	218.97	1942	14.2705	14.0366	14.7174	14.1486	14.28	14.2611	14.2088	14.2335	14.39	13.8695	14.5297	14.1153	14.6893	14.9418	14.3366	14.1064	14.6233	14.3893	14.5588	14.4479	14.5574	14.4957	14.2869	15.0909	14.6557	14.5295	14.3475	14.4774	14.1135	14.2916	14.6441	14.6642	14.0138	15.4413	14.2812	14.8266	14.4966	14.5515	14.8742	15.8129	0.85131	0.0435277	0.83226	0.0240833
P48357	Leptin receptor	LEPR	132.49	1165	10.5465	10.6016	11.3292	11.0551	10.8678	10.7691	11.0083	11.3234	10.8159	10.8159	11.5104	10.9361	11.3292	11.1616	11.43	10.726	11.1244	10.8678	11.634	11.1327	11.7455	11.3844	11.3292	12.0499	11.3172	11.4618	11.0461	11.297	11.3913	12.1395	11.3292	11.4533	11.6893	12.0604	11.6759	11.5647	11.4409	11.7405	11.6532	11.1327	0.828207	0.043567	0.709145	7.62255e-06
P41091	Eukaryotic translation initiation factor 2 subunit 3	EIF2S3	51.109	472	19.2364	19.3747	18.8236	18.7585	18.7324	19.0437	19.1702	19.0995	18.652	18.7674	18.734	18.8366	18.5608	18.6249	18.8869	18.6529	18.7414	19.0623	18.7098	18.8586	18.869	18.5664	18.792	18.7516	18.8285	19.0575	18.4787	18.6658	18.6546	18.4244	18.8087	18.5608	18.5774	18.7441	18.6647	18.8329	18.9754	18.3505	18.8353	18.2883	1.14791	0.0436619	1.13288	0.0112546
Q16740	ATP-dependent Clp protease proteolytic subunit, mitochondrial	CLPP	30.18	277	16.4401	16.6053	16.0931	16.1214	16.9181	16.445	16.4323	16.1244	16.5423	16.4707	16.3021	15.965	16.1011	15.9392	16.4226	16.4681	16.1782	16.0069	16.1756	16.4207	16.6666	16.3531	16.1854	16.2787	16.2874	16.6304	16.4426	16.0796	16.1092	16.0892	16.6172	16.4953	16.4314	16.4153	16.2403	16.4292	16.3856	16.1782	16.377	16.3566	1.1658	0.0436673	0.970089	0.523268
P15498	Proto-oncogene vav	VAV1	98.313	845	15.6532	15.6815	16.1601	15.4539	15.6402	15.5837	16.0637	15.6777	15.1401	15.5864	15.815	15.5946	16.1584	16.4463	15.7336	16.0445	16.0663	15.7267	15.6611	16.0894	15.8991	16.0287	15.8991	16.0869	15.9807	16.453	15.6486	16.1386	15.6871	15.8587	15.7669	15.9089	16.117	15.7579	16.9141	16.1974	16.458	15.8635	16.2676	15.8148	0.829588	0.0438493	0.847625	0.0184622
P37802	Transgelin-2	TAGLN2	22.391	199	21.4663	21.5011	21.0627	21.6017	21.2861	21.924	21.626	21.5906	21.0805	20.6745	20.6444	21.1478	21.332	20.5231	21.332	20.9791	20.9232	21.6971	20.6859	21.0506	20.7304	21.1312	21.2005	20.734	20.6666	20.8836	20.5312	21.0044	20.9104	21.0992	21.2005	21.0401	21.1206	21.0401	20.105	20.7468	20.7151	20.7614	20.8179	20.6457	1.27442	0.044024	1.27648	0.00208808
Q6JBY9	CapZ-interacting protein	RCSD1	44.503	416	12.6264	13.1752	14.3207	13.0401	13.7703	12.5863	12.986	13.0503	13.3278	13.0329	13.7758	13.3036	13.6435	14.6263	13.4932	13.5873	13.5873	12.9325	14.2579	13.5198	13.2813	13.8951	14.1125	13.4937	13.2779	14.1947	14.5582	13.7309	13.0697	13.0797	13.3587	13.6122	13.5603	13.7044	13.1113	13.3973	12.6993	13.5573	13.3612	14.3623	0.716428	0.0440314	0.908313	0.392861
O95292	Vesicle-associated membrane protein-associated protein B/C	VAPB	27.228	243	18.2798	18.5014	17.832	18.7912	18.2236	18.6044	18.2544	18.1278	18.3205	17.9364	17.7414	17.7805	18.073	18.7609	17.7657	18.1207	17.876	18.0357	17.9878	17.8762	17.6601	17.7338	17.9345	17.7288	18.0566	17.9187	18.44	17.7354	17.7898	17.542	18.002	18.0454	17.5493	18.073	18.3607	18.3216	17.3965	17.2942	17.8456	18.3125	1.21871	0.0440637	1.19536	0.0156739
P30711	Glutathione S-transferase theta-1	GSTT1	27.335	240	11.7737	11.8726	12.7271	12.1205	11.3233	12.0833	12.5131	12.7297	12.0018	11.9874	12.6958	12.0821	12.3861	12.5489	12.4168	12.3141	12.5228	12.4768	12.8642	12.2136	12.1156	13.4931	12.8053	12.9502	13.3776	13.0854	13.0903	13.5042	12.1262	13.1383	12.5289	12.5859	12.2883	12.4928	13.8832	12.3623	12.7465	12.3261	12.9368	12.5909	0.79066	0.0441098	0.688386	0.000438264
Q03169	Tumor necrosis factor alpha-induced protein 2	TNFAIP2	72.66	654	15.3017	15.4197	15.9331	15.4654	15.5342	15.4973	15.849	15.7127	15.3138	15.7209	15.7784	16.1113	15.4769	16.0127	16.1693	15.3958	15.9109	15.5593	15.8222	15.845	15.6633	15.8678	16.1774	15.9524	16.0021	15.6544	15.8209	15.8055	16.0248	16.2375	15.7909	15.8122	15.7836	15.8594	16.0136	16.236	15.8538	15.9742	15.7653	15.8116	0.850634	0.0443627	0.862228	0.00414798
P62308	Small nuclear ribonucleoprotein G	SNRPG	8.496	76	15.9741	16.6847	15.8118	16.0071	16.3933	16.6249	16.4227	16.3745	16.4875	15.8252	16.0475	16.0661	15.7225	15.2235	16.1858	16.2397	15.6763	16.3811	15.4137	16.1972	16.1638	15.9572	15.9916	15.8402	15.6917	16.0668	15.4898	16.1335	16.0702	15.5438	16.3913	16.2708	15.9882	16.2957	15.3381	16.1447	16.2197	15.1851	16.0359	15.4352	1.27039	0.0444343	1.12919	0.141979
P22570	NADPH:adrenodoxin oxidoreductase, mitochondrial	FDXR	53.836	491	17.5096	17.3748	17.9118	17.3781	17.4674	17.479	17.7648	17.7674	17.9552	17.2138	17.6339	17.8371	18.0232	18.1615	17.5668	18.0471	17.7262	17.5594	17.7129	17.7861	17.6372	17.6163	18.0852	17.741	17.7467	17.8549	18.0137	17.7683	17.7829	17.7348	18.0005	17.7852	17.9276	17.8176	17.6602	17.8027	17.8124	18.3453	17.7633	17.8118	0.856645	0.0444504	0.906521	0.0444219
A5PLL7	Transmembrane protein 189	TMEM189	31.135	270	12.3458	12.5136	12.0764	13.1035	12.2248	12.9957	11.9921	12.5128	12.3201	11.2152	11.0204	11.9849	11.7585	12.2563	12.6781	11.9179	11.3757	12.2733	11.4577	11.6333	10.9895	12.2752	12.3175	11.1877	10.6517	11.404	11.8951	11.6333	11.4598	11.8687	11.5665	10.78	11.6075	11.3865	11.0204	11.2601	11.404	11.7753	11.635	12.0464	1.40873	0.0444942	1.48926	0.000985403
Q9NS86	LanC-like protein 2	LANCL2	50.854	450	15.5064	15.4833	15.6575	16.1188	15.5384	15.8101	15.2356	15.1834	15.9004	15.6561	15.0277	15.9215	15.3055	15.2821	15.3698	15.4049	15.3573	15.3714	15.3536	15.1976	14.9747	15.0408	15.5825	15.0793	15.198	15.0607	15.2681	15.1317	15.3417	15.3232	14.9032	15.2785	15.4052	15.0667	15.8324	15.1862	15.0516	15.2826	15.1963	15.4397	1.18909	0.0445728	1.19079	0.00321921
Q9HCU5	Prolactin regulatory element-binding protein	PREB	45.468	417	16.7736	16.2895	16.7265	16.6795	16.7337	16.3206	16.6237	16.4742	16.4298	16.8663	16.8338	16.7061	16.4481	17.3136	16.9383	16.5268	16.9624	16.7759	16.6977	16.8649	16.8084	17.1127	16.6784	16.6031	16.7691	17.168	16.8482	16.4641	16.4613	17.1233	16.5535	16.5667	16.677	16.4169	16.484	16.6067	16.5236	16.6795	16.3748	16.9747	0.861539	0.0446238	1.00317	0.952898
Q9BQ39	ATP-dependent RNA helicase DDX50	DDX50	82.564	737	16.1597	16.1098	15.3741	16.5449	15.1593	16.1748	15.9015	16.2289	15.8514	14.9442	15.2404	15.0304	15.9484	14.7217	14.3091	16.2682	15.4889	15.6629	15.091	15.4045	15.3684	15.4061	15.2628	15.2202	14.9721	15.2163	15.4196	15.5373	15.4196	15.1412	15.3263	15.6071	15.3716	15.5339	16.2578	15.4226	15.4457	14.6274	15.5298	15.4763	1.44223	0.0446411	1.15077	0.184995
Q86U10	60 kDa lysophospholipase	ASPG	60.882	573	13.0357	12.9763	13.426	13.1523	13.4706	13.0776	12.6671	12.9811	13.6175	13.6595	13.5073	13.5616	13.8814	13.8022	13.0288	15.3111	13.4907	13.259	13.3601	13.6491	14.7218	14.0631	13.2285	14.3547	13.3523	13.4679	13.4851	14.8614	14.3836	13.8494	13.8427	13.8089	13.7202	14.5149	13.3869	12.789	13.3081	14.0574	15.163	13.4124	0.717602	0.0448135	0.735698	0.0211644
P32119	Peroxiredoxin-2	PRDX2	21.892	198	18.7387	18.56	18.4606	18.6402	18.476	18.9431	18.8113	18.9093	18.9649	18.7198	19.3195	18.9355	19.2585	19.0863	18.6932	18.5994	19.1802	18.3326	19.3941	19.1048	18.9688	18.9119	18.5353	19.0744	19.1726	19.2803	18.8879	19.0798	18.9757	20.1316	18.7031	19.5153	19.8207	19.1176	19.6429	18.8672	18.7604	20.5722	19.0014	19.5123	0.830458	0.0448961	0.773692	0.00792216
P83876	Thioredoxin-like protein 4A	TXNL4A	16.786	142	15.2244	15.1091	15.0269	15.5439	15.1717	15.1121	15.524	15.0957	15.1268	14.5631	14.4378	14.7972	14.9992	14.5617	15.0155	15.3475	14.7267	15.4183	14.6912	14.5796	14.9278	14.7314	14.8864	14.6317	14.601	14.8021	14.6505	14.5406	14.474	14.5535	15.0166	14.825	14.7691	14.9005	14.1776	14.6369	14.8996	14.9878	14.7115	15.0491	1.2246	0.0449689	1.20163	0.00464523
P34897	Serine hydroxymethyltransferase, mitochondrial	SHMT2	55.992	504	18.3984	18.0261	18.0123	17.8274	17.9226	17.9628	18.3075	18.1887	18.1863	18.2403	17.9421	18.0709	17.9153	17.7956	17.8219	17.9672	18.1251	17.6883	17.8749	18.213	18.0523	17.8462	18.049	18.0672	17.8803	18.3407	17.8059	18.0307	17.9451	17.7813	17.9409	18.0162	18.0625	18.0523	18.5972	18.1425	18.2098	17.8758	18.1137	17.7303	1.12179	0.0451689	0.998163	0.965884
Q13107	Ubiquitin carboxyl-terminal hydrolase 4	USP4	108.56	963	16.9683	16.8504	17.0485	17.2013	16.758	16.8416	16.7843	16.887	16.6493	16.8876	16.691	16.685	16.9405	16.7113	16.7354	16.899	16.7779	16.804	16.5584	16.7765	16.9589	16.9519	17.0574	16.8059	16.6934	16.8683	17.014	17.1646	17.1369	16.9064	17.0344	16.7546	16.8361	16.9275	16.6144	16.738	16.9156	16.836	17.0553	17.1284	1.09409	0.0451758	0.934887	0.0479433
P27169	Serum paraoxonase/arylesterase 1	PON1	39.731	355	16.4028	16.2866	17.0074	16.4279	16.3114	16.4294	16.4641	16.5609	16.4594	16.8536	16.8981	16.6551	16.8339	17.2682	16.5314	16.2336	17.047	16.67	17.5141	16.5675	17.9197	17.1352	16.7457	17.4487	17.3355	17.0594	17.1716	17.3117	17.2566	17.6217	17.1649	17.2877	16.949	17.4074	16.4889	17.2267	17.118	17.6094	16.8434	17.1404	0.811382	0.0452056	0.68732	7.91307e-06
Q08431	Lactadherin	MFGE8	43.104	387	17.5471	17.293	17.607	17.5617	17.3661	17.4112	17.4471	17.5246	17.2896	17.9773	20.0417	17.9667	17.5765	17.5974	17.7482	17.5592	17.7063	17.8209	20.0425	17.7968	17.6517	17.6008	17.5724	17.8472	17.8472	17.4551	18.5889	17.3849	17.8597	17.8769	17.5741	17.3776	17.7696	17.5221	17.8544	17.6228	17.8326	17.5659	17.5781	17.5545	0.622782	0.0457086	1.10744	0.42717
Q93100	Phosphorylase b kinase regulatory subunit beta	PHKB	124.88	1093	16.8398	17.2453	16.8743	16.852	17.431	17.0404	17.0942	16.9637	17.2395	17.2591	17.3507	17.164	17.0294	17.269	17.3432	17.1631	17.9014	17.1055	17.9273	17.1512	17.4807	17.1961	17.0411	17.0145	17.2612	17.1086	18.0675	17.1541	17.061	17.2777	17.2706	17.237	17.1491	17.1369	18.4487	16.9081	17.357	17.0343	16.9263	18.0192	0.837091	0.0460381	0.936098	0.400669
O94888	UBX domain-containing protein 7	UBXN7	54.862	489	16.567	16.9707	16.0336	16.5736	16.1082	17.1502	16.8642	16.547	16.2462	16.1694	15.9116	16.3969	16.4353	15.9423	16.1571	16.6274	16.2374	16.2367	16.0848	16.1994	15.9257	16.0912	16.0425	16.0345	15.9755	16.1989	16.0496	16.1401	16.149	16.1262	15.9653	16.0327	16.1754	16.1246	15.8907	16.0255	16.1211	16.3655	16.1729	15.8883	1.23123	0.0461701	1.22959	0.000690666
P16284	Platelet endothelial cell adhesion molecule	PECAM1	82.521	738	17.7344	17.5238	18.3913	17.9803	17.9354	17.5827	17.6758	17.7477	17.8834	17.7458	18.2129	17.9205	18.1304	18.3331	17.8254	17.8695	18.2835	17.6249	18.0298	18.2911	18.4199	18.225	18.1858	18.317	18.0506	18.751	18.6897	18.0192	17.9367	18.5364	18.1589	18.18	18.5507	18.2572	18.1885	18.0976	18.6916	18.3078	17.9942	18.6171	0.851418	0.046361	0.772359	5.28218e-05
Q86T03	Type 1 phosphatidylinositol 4,5-bisphosphate 4-phosphatase	TMEM55B	29.469	277	16.7057	17.0158	16.5651	16.8203	16.1505	17.0531	16.8135	16.6858	16.4987	16.8167	16.391	16.391	16.5223	16.5072	16.5112	16.9161	16.415	16.6334	16.4239	16.2698	16.4904	16.3636	16.4156	16.972	16.9899	16.4814	17.2293	16.6007	16.3803	15.9247	16.3942	16.4185	16.4694	16.5838	17.8099	16.9649	16.6266	17.4605	16.7342	17.1596	1.16027	0.0465329	0.921348	0.304562
P50579	Methionine aminopeptidase 2	METAP2	52.891	478	17.2314	17.4737	16.7304	17.0478	16.8588	17.4251	16.5441	16.8801	16.7176	17.4376	16.4207	16.8561	16.6109	16.42	16.8988	17.1058	16.5443	17.3383	16.2851	16.6576	16.8528	17.162	16.7962	16.4115	16.3808	16.5092	16.4576	16.8479	16.7472	16.8568	16.5893	16.4922	16.2018	16.7003	16.6186	16.6442	16.3606	16.4398	16.651	16.686	1.2491	0.0466893	1.19245	0.0117137
Q96KR1	Zinc finger RNA-binding protein	ZFR	117.01	1074	17.7499	18.2035	17.8549	17.5012	17.8836	18.1023	18.2071	18.0855	17.4257	17.672	17.4254	17.7753	17.6311	17.7342	17.6599	18.0078	17.458	17.8162	17.2548	17.5108	17.383	17.4237	17.7342	17.6297	17.6092	17.4525	17.4741	17.5946	17.4907	17.3058	17.5783	17.2483	17.3003	17.5327	18.0329	17.8088	17.4098	17.0874	17.7068	17.3675	1.182	0.0468079	1.18054	0.00400058
Q16853	Membrane primary amine oxidase	AOC3	84.621	763	18.9462	18.5132	19.2139	19.4761	19.2545	18.9489	18.833	18.6474	19.0492	19.9929	19.9805	18.9838	19.1164	19.5105	19.0622	19.1787	19.7173	19.4962	20.3933	19.598	19.4972	19.9262	19.0709	19.81	19.3193	19.1807	19.367	19.3444	19.87	21.0031	19.1915	19.7459	20.5679	20.1814	19.5163	18.962	19.1592	21.5124	19.2061	19.5776	0.749407	0.0472817	0.755316	0.0337959
Q9Y508	E3 ubiquitin-protein ligase RNF114	RNF114	25.694	228	12.7706	13.6588	12.6699	12.7144	12.827	12.6642	12.5206	12.5288	12.1187	12.3363	12.5179	12.2792	12.5255	12.2893	12.2606	12.3384	12.0461	13.0374	12.2244	11.7751	11.9383	12.4839	12.066	12.2893	12.5493	12.1132	12.7171	12.1314	11.9737	11.3945	12.2343	12.2106	12.1054	12.4464	12.9861	12.6545	12.2314	13.2396	12.366	12.2713	1.27593	0.0473045	1.13685	0.15138
O75116	Rho-associated protein kinase 2	ROCK2	160.9	1388	18.0943	18.1238	18.1185	17.8064	18.1192	17.9618	18.1086	17.9792	18.1641	18.3265	18.2163	18.3516	18.2285	17.9143	18.4143	18.0808	18.229	18.1971	18.3487	18.1668	18.1347	18.2072	18.2232	18.2009	18.229	18.084	17.9745	18.0116	18.1487	18.2672	18.2285	18.2369	18.199	18.147	17.7964	18.2189	18.3301	17.9412	18.053	18.2763	0.910986	0.0476959	1.00144	0.963743
P52735	Guanine nucleotide exchange factor VAV2	VAV2	101.29	878	14.3414	14.1391	14.5248	14.5681	14.6782	14.2813	14.7411	14.8293	14.278	14.682	14.7093	14.6862	14.4276	14.8519	14.9988	14.5448	14.4796	15.2406	14.7691	14.6364	14.838	14.2966	14.4704	14.4141	14.4816	14.7234	14.7999	14.5609	14.1908	14.5812	14.5292	14.5873	14.8763	14.3883	14.8046	14.4734	14.8684	14.5337	14.3198	14.6303	0.853748	0.047722	1.03669	0.484126
Q4G176	Acyl-CoA synthetase family member 3, mitochondrial	ACSF3	64.129	576	17.2729	17.6262	17.5643	17.6569	17.4263	17.3565	17.5244	17.6854	17.0306	17.1837	17.1502	17.092	17.3993	17.2077	17.2691	17.564	17.3832	17.1657	17.152	17.1655	17.1153	17.2748	17.6326	17.2082	17.0429	17.1178	17.5304	17.2059	17.0142	17.3751	17.1963	17.2691	17.1577	17.1472	17.5436	17.1379	17.2168	17.7162	17.1178	17.4632	1.13121	0.0478762	1.04946	0.283857
P02656	Apolipoprotein C-III	APOC3	10.852	99	12.7081	12.6297	13.6735	12.5635	12.476	12.6436	13.1338	12.9434	12.9704	13.6832	13.9493	13.685	13.9752	13.0256	13.3589	12.295	13.7625	12.8918	14.0165	13.256	14.9839	14.0413	13.2059	14.7177	14.7482	14.5169	14.8354	13.8935	13.8109	14.5266	13.9587	14.1522	15.0795	14.0271	13.42	14.0284	13.5903	15.0481	13.2288	14.934	0.71745	0.047962	0.481187	1.28392e-06
P62072	Mitochondrial import inner membrane translocase subunit Tim10	TIMM10	10.333	90	12.7437	12.9666	12.9756	12.6932	13.0175	12.6521	12.8069	12.9008	12.7043	12.7293	12.6619	12.6881	12.4927	12.0753	13.0797	12.8314	12.7233	12.6067	12.5723	12.5018	12.6881	12.5691	13.1086	12.5083	12.634	12.7486	13.2178	12.5159	12.4444	12.4565	12.8307	12.4388	12.6512	12.7921	12.64	13.0339	13.162	12.1461	12.2658	13.5244	1.14526	0.0479833	1.00163	0.979722
Q9BR39	Junctophilin-2	JPH2	74.221	696	15.6311	15.3638	16.0757	15.5884	15.508	15.3696	15.884	15.9151	16.0001	16.0864	16.2535	16.0363	15.8938	16.5728	16.0858	15.2805	17.1661	15.7185	16.4239	15.9204	16.027	16.027	16.1812	16.524	17.019	15.9392	17.4198	15.9226	15.7662	15.9695	15.7594	16.2773	16.2479	16.0324	17.7151	16.1292	15.7426	16.4323	16.3413	17.4431	0.761569	0.0481442	0.754137	0.0190906
P35556	Fibrillin-2	FBN2	314.77	2912	16.927	16.7977	17.3744	16.8404	16.851	16.7433	17.1203	16.5226	16.2757	18.0227	17.2659	17.2665	18.8201	16.7688	17.2853	18.3395	16.9301	17.0999	17.4198	17.624	16.1333	17.4113	17.4587	17.5716	17.2013	16.0908	18.1545	17.4649	17.3875	16.3612	16.3109	16.1565	16.2212	17.3284	17.729	17.0747	16.881	16.6583	17.4517	16.6862	0.690409	0.0482658	1.1713	0.24944
Q9UBB5	Methyl-CpG-binding domain protein 2	MBD2	43.254	411	17.6622	17.7542	17.2343	17.341	17.5377	17.5932	17.3596	17.2491	17.4942	17.1804	16.8604	17.2331	17.1911	17.4261	17.0194	17.6474	16.9571	17.315	16.7551	17.5883	17.2474	17.4628	17.3789	17.2743	17.0088	17.3972	17.4207	17.2547	17.279	17.2259	17.5675	17.1949	17.1644	17.3998	16.6389	17.4252	17.3044	16.8824	17.4407	17.1355	1.18205	0.0483292	1.04591	0.415996
Q8WVM7	Cohesin subunit SA-1	STAG1	144.43	1258	16.5335	16.5329	16.7368	16.6986	16.994	17.1529	16.7593	17.0242	17.2328	16.9832	16.6113	16.6928	16.6716	16.6275	16.0134	17.0281	16.8091	16.4965	16.5759	16.7229	16.7748	16.6009	16.8972	16.8043	16.7293	16.9591	16.667	16.7593	16.7261	16.8372	16.7662	16.7895	16.8593	16.7788	18.5187	16.7077	16.8627	16.6719	16.8017	16.7824	1.18093	0.0484126	0.920288	0.275279
P61313	60S ribosomal protein L15	RPL15	24.146	204	18.359	18.7194	17.8912	18.0442	17.566	18.1342	18.5411	18.4755	18.3155	18.3641	18.2724	17.8346	18.2575	17.8077	17.567	18.1967	17.7578	18.0232	17.8046	18.1017	18.3361	18.1558	17.8515	18.4273	18.3039	18.8414	17.7517	18.1727	18.2661	17.1406	18.5578	18.1314	17.7598	18.6163	17.8077	18.3995	18.1579	17.5896	18.787	17.497	1.21309	0.0485415	0.982221	0.833703
O15127	Secretory carrier-associated membrane protein 2	SCAMP2	36.648	329	14.3665	14.6422	14.5787	14.3645	14.286	14.4191	14.4467	14.7217	14.5048	14.8453	14.9778	14.7357	14.7129	14.3052	14.9733	14.456	14.7545	14.485	14.7696	14.969	15.2725	14.6948	14.4325	14.9767	14.9107	15.0054	14.4195	15.331	14.8167	15.0693	15.0728	15.0072	14.62	14.9686	14.4533	15.0009	15.0627	14.8314	15.1718	14.7177	0.87277	0.0487463	0.82585	0.00107198
Q86X10	Ral GTPase-activating protein subunit beta	RALGAPB	166.8	1494	15.519	15.4721	15.85	15.5212	15.8485	15.7773	15.5226	15.7667	15.5346	15.8744	15.8877	15.519	15.8484	16.076	15.6976	15.885	15.8736	15.771	15.6718	16.0469	15.6564	15.6732	15.9187	15.617	15.6558	16.3758	15.6249	15.9022	16.0911	16.1309	15.7796	15.9699	16.049	15.9254	16.0884	15.7698	16.0837	15.5338	15.4661	15.6799	0.895606	0.0488048	0.932122	0.140842
P19971	Thymidine phosphorylase	TYMP	49.955	482	19.1815	19.5333	18.856	19.1554	19.0922	19.1919	18.9951	19.3422	18.8587	18.5955	18.5016	18.4429	19.0011	18.7477	18.8188	18.7533	18.8808	19.6321	18.4652	18.6121	18.4808	18.7192	18.8335	18.5101	18.4955	18.9427	18.9113	18.7106	18.5955	18.365	18.6275	18.6873	18.872	18.5682	18.6059	18.503	18.9553	18.721	18.5341	18.8675	1.22655	0.0488794	1.19546	0.00450434
P62273	40S ribosomal protein S29	RPS29	6.6767	56	17.4312	17.5649	16.6591	17.5217	17.2101	17.6601	17.7021	17.2615	17.2192	17.2918	16.7154	17.8084	16.3501	17.2526	17.6177	17.154	16.1657	17.3571	15.9861	16.3589	16.64	16.9929	17.1337	16.3982	16.5323	17.3268	16.4893	16.5667	16.8638	16.0051	17.1366	16.1807	16.2699	16.5374	17.2098	17.0069	15.9833	15.9034	17.314	16.2262	1.39047	0.0489336	1.39333	0.00490492
P07355	Annexin A2	ANXA2	38.604	339	22.4789	22.1677	22.2001	22.6254	21.9521	22.4905	22.4328	22.4618	22.0322	21.6831	21.7167	22.2346	22.132	21.4761	21.6958	22.5759	21.6142	22.2916	21.7347	21.9687	21.902	22.2001	22.0077	22.015	21.7347	21.8015	21.4727	22.2153	22.2635	22.1008	22.0356	21.9275	21.9275	22.2001	21.4546	21.9521	22.015	21.8258	22.2125	21.386	1.23837	0.0490297	1.12175	0.100047
Q16775	Hydroxyacylglutathione hydrolase, mitochondrial	HAGH	33.805	308	16.983	17.2638	17.3692	17.0568	17.2992	17.0595	17.2614	17.2092	17.521	17.1568	17.3756	17.1614	17.0525	17.7335	18.035	17.1643	17.6233	17.3945	17.7382	17.2712	17.392	17.1964	17.584	17.1412	17.4395	17.7138	17.9489	17.3762	17.2608	17.3997	17.4157	17.2465	17.1721	17.3003	17.9869	17.5719	17.3807	17.6178	17.0371	17.9006	0.848533	0.049058	0.921701	0.179369
Q06203	Amidophosphoribosyltransferase	PPAT	57.398	517	17.026	17.6026	16.7592	17.1015	16.9325	17.2342	16.7158	16.7418	17.3043	17.0587	16.8024	17.1885	16.6338	16.4629	16.9921	17.0552	16.5365	16.8832	16.783	16.7122	16.8125	16.5515	16.6647	16.4525	16.497	16.9674	16.2192	16.574	16.6362	16.6015	16.7285	16.6875	16.3885	16.7433	16.7976	16.4691	16.735	16.6806	16.5401	16.412	1.18318	0.049136	1.24694	0.000106364
P29622	Kallistatin	SERPINA4	48.541	427	17.0196	17.1903	17.5471	17.1434	17.4697	17.2606	17.2139	17.3031	17.5337	18.07	18.1263	17.585	17.6591	17.676	17.8719	17.0014	17.7008	17.441	17.7967	17.6846	18.1254	17.9987	17.4112	17.8447	18.1915	18.0683	17.8694	17.8906	18.128	18.2052	17.816	17.9258	18.1799	17.6544	17.5146	17.958	18.1926	17.9392	17.5146	17.998	0.824077	0.0491404	0.754413	5.70408e-05
Q13315	Serine-protein kinase ATM	ATM	350.68	3056	17.1702	16.9861	17.2623	16.8512	17.1518	16.9346	17.0792	17.0022	17.17	17.6349	17.8455	17.277	17.5797	17.2065	17.1433	17.3647	17.3734	16.7859	17.6706	17.458	17.4829	17.2244	17.1325	17.5976	17.6875	17.8491	18.1551	17.2771	17.2521	17.3854	17.4851	17.6532	17.5402	17.4708	17.7874	17.9188	17.965	17.4082	17.3575	18.2965	0.843112	0.0492856	0.785144	0.000746133
P60981	Destrin	DSTN	18.506	165	19.3124	18.871	18.3872	19.5296	18.6818	18.9918	19.0263	19.0583	18.5711	19.1624	18.4695	18.4754	19.3726	18.4873	18.1311	18.915	18.5476	18.8174	18.7694	18.333	18.3611	18.7701	18.3118	18.4817	19.0422	18.1976	18.0986	18.4906	18.8934	18.4068	18.4387	18.2494	18.3302	18.4978	18.4139	18.4998	18.2876	17.9971	18.5515	18.105	1.25473	0.0492977	1.29618	0.000769574
P22792	Carboxypeptidase N subunit 2	CPN2	60.556	545	15.9536	15.695	17.2791	16.0882	16.35	16.1999	16.2278	16.1948	16.1058	16.7275	17.162	16.3962	16.7301	16.9599	16.3544	15.8874	16.9247	16.3558	17.2585	16.8948	18.1573	16.8311	16.9371	17.3194	17.2737	17.3553	17.0387	17.6906	17.4607	17.4969	17.3295	17.3215	16.9664	17.5528	16.3678	16.951	17.5174	17.6246	17.044	17.0396	0.752524	0.0493089	0.583786	1.46911e-06
Q14155	Rho guanine nucleotide exchange factor 7	ARHGEF7	90.011	803	18.4111	18.1036	18.6079	18.0398	18.4409	18.107	18.465	18.1557	18.1549	18.4047	18.321	18.6013	18.4752	18.4133	18.2181	18.3828	18.391	18.6623	18.4593	18.5491	18.2495	18.2927	18.4802	18.447	18.42	18.337	18.4165	18.5368	18.6615	18.3092	18.3233	18.4879	18.5872	18.397	17.9369	18.4452	18.292	18.391	18.3984	18.1266	0.896096	0.0493488	0.994063	0.874899
Q8WXA9	Splicing regulatory glutamine/lysine-rich protein 1	SREK1	59.38	508	17.3983	16.929	17.5125	17.5872	17.1469	17.3502	17.3441	17.2018	17.0935	16.5649	16.3626	16.825	17.6791	16.6637	16.4296	17.2089	16.6914	17.3097	16.7441	16.8271	16.7329	16.6957	17.1984	16.5813	16.4249	16.8551	16.4533	16.897	16.8592	17.224	16.8467	16.9075	17.0979	16.8452	16.5522	16.531	16.6703	17.5582	16.7836	16.583	1.26463	0.0494855	1.17171	0.0413251
Q9NY15	Stabilin-1	STAB1	275.48	2570	17.9469	17.7474	18.688	18.2221	18.9056	17.9081	18.0491	18.1261	18.1064	17.9339	18.5363	18.2119	18.593	19.1515	18.356	18.2444	18.6343	18.303	18.2801	18.3812	18.3601	19.1291	18.733	18.4608	18.0616	18.1074	18.6429	18.6665	18.4439	18.8737	18.2549	18.1548	18.5731	18.4159	18.8339	18.2791	19.0118	18.3549	18.1883	19.0055	0.808985	0.0495291	0.863759	0.0554906
Q9Y6U3	Adseverin	SCIN	80.488	715	18.0486	18.1552	18.9662	18.1585	18.3191	18.0308	18.4696	18.3422	18.4813	18.7913	19.7059	18.6279	18.5313	18.5945	18.544	18.0505	18.6143	18.467	19.8003	19.0872	21.0715	19.5765	19.052	20.1173	19.1286	18.7322	18.7838	20.2669	19.9376	19.2791	19.7751	18.9099	18.9781	20.0622	18.9213	18.997	18.9177	18.9879	20.5905	18.889	0.744322	0.0496582	0.551175	5.02181e-05
P46939	Utrophin	UTRN	394.46	3433	19.9199	19.996	20.4759	20.0468	20.5721	20.029	20.1157	20.1093	20.5274	20.6077	20.7129	20.4235	20.6557	20.3202	20.3821	20.2483	20.4942	20.1704	20.7321	20.4712	20.6424	20.6633	20.5646	20.7474	20.6445	20.4778	20.3941	20.7935	21.0923	20.6077	20.8151	20.6983	20.6633	20.7129	20.2765	20.7403	20.7789	20.5721	20.4107	20.3941	0.857913	0.0496593	0.821323	0.000260921
O95260	Arginyl-tRNA--protein transferase 1	ATE1	59.09	518	13.687	13.6566	13.978	14.0614	13.8618	13.892	13.3973	13.6786	13.8966	14.1991	14.7926	13.9135	14.1829	14.5336	14.0737	13.8499	13.9027	14.1502	13.9942	13.6432	13.8061	13.7744	14.2339	13.8108	13.7779	14.2529	13.8684	14.1235	14.7357	14.6034	13.7566	13.8318	13.8671	13.6566	14.0123	13.6294	14.097	14.2923	14.1502	14.0555	0.82771	0.0498671	0.966238	0.613314
Q6ZS81	WD repeat- and FYVE domain-containing protein 4	WDFY4	353.61	3184	16.2888	16.3166	16.4412	15.8292	16.4718	16.3541	16.0369	16.4543	15.9171	15.3893	15.6879	15.8931	15.9686	15.3551	15.6869	16.0194	16.3233	15.8554	15.6756	16.0855	16.3542	16.1193	16.0938	15.6264	15.5404	16.1844	16.0188	16.2535	15.6289	15.7015	16.2603	16.0437	16.2648	16.2126	15.6692	15.6613	16.3041	16.0647	15.6854	16.4716	1.22674	0.0498674	0.996226	0.957088
Q9H6S0	Probable ATP-dependent RNA helicase YTHDC2	YTHDC2	160.25	1430	17.128	17.4941	17.4613	17.3616	17.2885	17.4237	17.3396	17.4483	17.5185	17.326	17.4193	17.3391	17.2238	17.0547	17.4176	17.3052	17.3176	16.9845	17.0891	17.3482	17.4071	17.3765	17.5517	17.3733	17.0883	17.2839	16.8788	17.4079	17.5465	17.336	17.502	17.4577	17.5304	17.5304	16.979	17.2129	17.2851	17.5053	17.731	17.0476	1.09358	0.0498933	0.974583	0.533251
Q9NPY3	Complement component C1q receptor	CD93	68.559	652	15.8388	15.5666	16.5027	16.2072	15.8181	16.7919	15.8459	16.0491	15.7522	16.0511	16.7118	16.347	16.053	16.4213	16.4087	16.2549	16.4222	16.358	16.0706	16.1659	16.6923	16.0749	16.4527	16.4045	16.5605	16.014	16.58	16.1177	16.108	17.1137	16.2635	16.3018	16.7635	16.2509	16.1612	16.6195	15.9919	15.9856	16.4212	16.3928	0.824182	0.0500566	0.881686	0.0716535
P26373	60S ribosomal protein L13	RPL13	24.261	211	18.9102	18.9604	19.0599	19.3007	18.7311	18.7947	18.8939	18.8548	18.9891	18.8823	18.7908	18.8385	18.6915	18.8385	18.8765	19.014	18.7184	18.6616	18.6933	18.9466	19.0542	18.793	18.7676	18.9368	18.7684	19.0448	18.4818	18.7582	18.7257	18.9544	18.9624	18.815	18.5935	19.0416	18.4398	18.7851	18.8445	18.57	19.0268	18.6031	1.09483	0.0505739	1.05263	0.180197
Q9NR19	Acetyl-coenzyme A synthetase, cytoplasmic	ACSS2	78.579	701	17.973	17.8011	17.8705	17.6394	18.1907	17.9941	17.7782	17.8359	17.9113	18.1413	18.2498	18.6058	18.1412	18.0239	18.0502	17.6792	17.9952	17.7921	18.43	18.3669	18.3617	18.1326	18.0368	18.1168	18.3302	18.3066	18.2225	18.8216	18.8365	18.5149	18.2941	17.8755	18.1343	18.2852	17.8977	18.3302	18.1822	17.6105	18.4547	18.3534	0.858628	0.050721	0.851794	0.0107583
P04196	Histidine-rich glycoprotein	HRG	59.578	525	16.8322	16.8551	17.7758	17.3228	17.32	17.0234	17.2234	17.0771	17.1097	17.8703	17.798	17.5044	17.6604	18.3906	17.6192	17.0629	17.4312	17.1339	17.5831	17.5784	17.4155	17.4716	17.6568	18.6741	18.1029	17.2282	17.604	18.1004	18.2603	18.043	17.7276	17.7845	17.31	17.9714	17.2338	17.9699	17.4908	17.9376	17.6244	17.677	0.792659	0.0508134	0.781552	0.00529395
P46934	E3 ubiquitin-protein ligase NEDD4	NEDD4	149.11	1319	15.4727	15.057	15.1343	15.5463	15.3468	15.1178	15.1747	15.1299	15.3681	14.9393	15.2864	15.6415	15.4102	15.3217	15.5183	15.4632	15.5347	15.6525	15.1178	15.1391	15.3987	15.462	15.1997	15.1079	14.9541	15.2611	15.8551	15.3373	15.2546	15.4575	15.1005	15.1642	15.4758	15.2499	15.0058	15.1114	15.3971	15.2976	15.026	15.6	0.882782	0.0508608	1.02299	0.631836
P20292	Arachidonate 5-lipoxygenase-activating protein	ALOX5AP	18.157	161	14.1084	14.6587	13.7308	13.8195	13.6394	14.1047	13.9222	14.2573	14.8027	14.0717	13.9874	13.6385	13.9041	13.5792	13.4776	13.8832	13.9218	13.9591	13.7916	14.1307	13.8526	13.8402	13.6622	14.0287	13.7607	14.2955	14.0843	13.9016	13.9738	13.6267	13.9817	14.131	13.978	13.9943	13.7677	14.1967	14.1428	13.9903	13.7963	13.5911	1.21776	0.0509726	1.02784	0.645366
P19823	Inter-alpha-trypsin inhibitor heavy chain H2	ITIH2	106.46	946	19.3793	19.1143	19.7316	19.4873	19.2584	19.336	19.4341	19.5393	19.3171	20.3635	20.3984	19.5112	20.2744	19.5292	19.5956	19.3664	19.9688	19.5517	20.15	19.9409	20.3625	19.8403	19.4921	20.342	20.1059	19.8948	19.636	19.9306	20.1001	20.4226	19.9346	20.2357	20.0797	19.8186	19.7485	19.8627	20.0008	20.4398	19.6676	19.7612	0.794123	0.0511925	0.800272	0.00427939
Q99627	COP9 signalosome complex subunit 8	COPS8	23.225	209	14.2312	14.441	13.8615	13.8807	13.6017	13.8407	13.9176	14.1672	14.07	14.3578	14.4891	13.8017	14.9695	14.408	13.9147	14.2021	14.3546	14.0573	14.7237	14.3681	14.3966	14.2288	14.0036	14.6754	14.717	14.5945	14.6017	14.5521	14.6815	14.9807	14.6799	14.7208	14.156	14.7779	14.4176	14.6188	14.5186	14.7942	14.6601	14.4619	0.816801	0.0512482	0.768982	0.000197216
Q96JY6	PDZ and LIM domain protein 2	PDLIM2	37.458	352	14.9152	14.638	14.4825	14.9963	14.663	14.6834	14.6477	14.4873	15.2162	14.5857	15.002	14.8181	14.8122	15.0407	14.7745	15.3488	14.6558	14.8884	14.9745	15.0088	15.5362	15.1895	14.3016	15.2127	14.7313	14.8738	14.699	15.5454	15.4637	15.2059	15.3175	15.1164	15.1092	15.3203	14.2992	14.8573	14.8221	15.1696	15.9745	14.9346	0.870048	0.0513123	0.839711	0.0220939
Q13283	Ras GTPase-activating protein-binding protein 1	G3BP1	52.164	466	18.4895	18.889	18.1123	18.7103	18.471	18.7276	18.7136	18.6299	18.7484	18.2969	18.2287	18.4811	18.0836	18.1728	18.2689	18.7187	18.3055	18.767	18.084	18.443	18.566	18.5273	18.1876	18.4373	18.1297	18.2434	17.9725	18.3395	18.3897	18.4459	18.5477	18.153	18.2875	18.5098	18.85	18.1505	18.292	18.3263	18.5409	18.0121	1.16758	0.051509	1.08798	0.114924
O60760	Hematopoietic prostaglandin D synthase	HPGDS	23.344	199	13.7623	13.8216	14.2881	12.6685	12.9899	13.1763	13.2594	13.432	13.3692	13.5986	13.4091	14.4148	14.18	13.5861	13.5533	13.5779	14.5079	13.3437	14.0521	13.8408	13.4184	13.8242	14.2761	13.8928	13.8546	13.6989	13.4917	13.9616	14.1285	14.5945	13.1483	13.6796	13.9611	13.5249	13.1168	14.2618	14.2116	13.61	13.3779	13.325	0.752635	0.051679	0.916148	0.370573
Q13155	Aminoacyl tRNA synthase complex-interacting multifunctional protein 2	AIMP2	35.348	320	17.7239	17.554	17.3225	17.8235	17.4096	17.7541	17.6628	17.5003	17.6724	17.5915	17.5454	17.5072	17.5755	17.0612	17.3132	17.5363	17.4817	17.5511	17.5624	17.4008	17.5295	17.744	17.3315	17.4894	17.3575	17.3873	17.3362	17.3649	17.3812	17.2095	17.5559	17.6364	17.6504	17.5408	17.4998	17.3476	17.3933	17.572	17.7587	17.3415	1.10802	0.0520183	1.03965	0.279095
Q86UU1	Pleckstrin homology-like domain family B member 1	PHLDB1	151.16	1377	16.0707	15.933	16.2445	15.9442	16.2156	16.0027	16.7924	16.5	16.3529	16.2724	16.4461	16.4217	16.4047	17.0547	16.389	16.1325	16.614	16.5361	16.6456	16.1579	16.1077	16.2124	16.4012	16.3071	16.4198	16.1783	16.0678	15.962	16.4786	16.443	16.0492	16.2802	16.1728	15.9681	16.6403	16.3258	16.319	16.1325	16.0598	16.233	0.842412	0.052249	1.08568	0.127821
Q9BRA2	Thioredoxin domain-containing protein 17	TXNDC17	13.941	123	18.1685	17.7753	17.4417	17.2734	16.5266	16.7036	17.6081	17.2118	17.3729	16.6915	16.5328	16.7765	17.1913	17.0712	16.6406	17.0808	17.239	16.6982	16.9114	16.8704	17.0181	16.9262	17.4146	17.5008	17.4461	16.91	16.4666	17.3517	17.0488	16.6174	16.7996	16.7047	16.7447	16.8873	17.2237	17.0045	16.5002	18.7515	17.6357	16.3653	1.29784	0.0523008	1.01636	0.880825
Q5T8P6	RNA-binding protein 26	RBM26	113.6	1007	16.8856	17.214	16.7545	16.873	16.8139	17.0602	16.9784	17.0377	17.1075	16.6028	16.7292	16.9907	16.9161	16.282	16.6135	17.0472	16.7725	16.8088	16.4924	16.7407	16.7713	16.7689	16.5463	16.8296	16.744	16.9378	16.6934	16.616	16.478	16.5145	16.9018	16.8413	16.7242	16.6982	16.725	16.7319	16.9657	16.6026	16.8264	16.7095	1.14351	0.0523828	1.07527	0.0821949
Q5VTT5	Myomesin-3	MYOM3	162.19	1437	17.9525	17.8786	18.2333	18.043	18.1972	18.3391	17.7655	17.7365	18.1267	18.5411	18.4621	18.1136	18.3358	18.3378	18.177	18.0006	19.6697	18.2185	18.2981	18.7885	18.4416	18.2664	18.4932	18.0249	17.7613	17.8626	19.7341	18.5425	18.3255	18.956	18.2174	18.692	18.8303	18.3814	20.7052	17.4923	17.9051	18.5833	18.5258	19.8474	0.779803	0.0524597	0.801819	0.111091
Q8NFC6	Biorientation of chromosomes in cell division protein 1-like 1	BOD1L1	330.46	3051	12.4973	12.5685	12.4897	12.4804	12.9486	12.5708	12.533	12.6452	12.8013	12.6564	12.6798	12.9521	12.4361	13.0329	13.8842	13.2305	12.6793	12.6354	12.6882	12.8541	13.1083	12.4816	12.4176	12.7718	12.7638	12.9562	12.8275	12.7078	12.533	13.2018	12.789	12.7599	12.8021	12.5218	12.7773	12.983	12.9562	13.0148	12.5602	12.9337	0.818954	0.0525115	0.9793	0.736788
O43301	Heat shock 70 kDa protein 12A	HSPA12A	74.977	675	16.4776	16.3769	16.6532	16.9036	16.648	16.3071	16.7372	16.8216	16.7566	16.8734	17.5092	16.7673	17.2616	16.4776	16.9277	16.5408	16.7845	16.8163	17.291	16.7681	17.1218	16.8119	16.8095	17.0769	17.0808	17.1424	16.8435	16.9982	17.5519	17.3281	16.8287	17.0977	16.7477	17.2924	16.8805	16.6833	17.0186	17.2047	16.7385	16.7893	0.835721	0.0525477	0.860137	0.0147293
Q9UBN7	Histone deacetylase 6	HDAC6	131.42	1215	15.0968	15.0876	15.2432	15.1722	15.352	15.3212	15.0075	15.0391	15.0233	15.4129	15.3258	15.1532	15.3238	16.2601	15.3027	15.2888	15.2548	15.371	15.3649	15.3583	15.1644	15.1199	15.2362	15.1267	15.3539	15.6108	15.584	15.6212	15.7036	15.7579	15.1905	15.4029	15.5722	15.2076	15.7753	15.378	15.548	15.2055	15.0226	15.3807	0.855723	0.052572	0.926501	0.169303
P10915	Hyaluronan and proteoglycan link protein 1	HAPLN1	40.165	354	17.6388	17.5702	18.0087	17.8301	18.159	18.0942	17.1684	17.0789	17.6091	20.1478	22.3893	19.0457	17.9445	18.0812	18.155	17.7862	17.8972	19.1254	22.3405	19.3534	17.7086	17.9766	18.0751	18.0219	18.3792	17.8544	19.4998	18.0517	18.0042	17.8755	18.0106	17.8396	17.7332	17.7352	18.2756	18.0418	17.9161	17.8916	17.4614	17.6007	0.411417	0.0526578	1.48817	0.106702
Q8NF50	Dedicator of cytokinesis protein 8	DOCK8	238.53	2099	18.2677	18.308	18.6973	18.2488	18.7118	18.3278	18.4618	18.4688	18.6227	18.161	18.5687	18.3168	18.6076	19.2912	18.9772	18.3815	18.7304	18.3907	18.451	19.1719	18.97	18.6854	18.6787	18.4587	18.5117	19.5138	18.3272	19.0441	18.5848	18.4534	18.86	18.6493	18.7532	18.7745	18.2799	18.7039	19.1925	18.7681	18.4137	18.6815	0.83444	0.0527897	0.896835	0.108335
Q12874	Splicing factor 3A subunit 3	SF3A3	58.848	501	18.4675	18.5094	18.3589	18.3201	18.2917	18.7431	18.6799	18.3587	18.1086	17.9983	17.9368	18.3115	18.5037	17.3738	18.1222	18.7386	17.9224	18.2343	17.6745	18.0208	17.9196	18.0338	18.045	17.9582	17.9372	18.0062	17.5715	18.0295	17.8791	17.8586	18.1284	18.0497	18.2884	18.1323	17.4362	18.2439	17.9589	17.3088	18.0416	17.5058	1.23095	0.0528085	1.24581	0.00251555
Q9Y266	Nuclear migration protein nudC	NUDC	38.242	331	17.7608	17.8212	17.216	17.7687	17.7778	17.8357	17.6511	17.9634	17.7092	17.3859	18.0496	17.3203	17.4735	17.4273	17.2464	17.3233	17.4556	17.7987	17.2693	17.2621	17.4726	17.3623	17.1799	17.2639	17.3653	17.4492	17.2343	17.2352	17.3965	17.2074	17.8776	17.7793	17.2265	17.4849	17.1309	17.5299	17.601	16.7752	17.484	17.5377	1.16988	0.0528933	1.14561	0.0192655
Q13907	Isopentenyl-diphosphate Delta-isomerase 1	IDI1	26.319	227	16.8358	16.3777	16.7218	17.0819	17.1411	16.6391	15.6821	17.1725	16.351	16.1121	15.941	16.7298	16.131	16.387	16.4033	15.7877	15.9944	16.2879	16.3283	16.4554	15.8002	16.0064	16.5467	15.999	16.0857	16.4969	16.5543	16.1445	16.1429	15.6599	15.7281	15.8981	15.5905	15.7539	16.201	15.6065	15.7537	16.6841	16.2045	16.6814	1.28959	0.0530503	1.27556	0.00801084
O95433	Activator of 90 kDa heat shock protein ATPase homolog 1	AHSA1	38.274	338	18.8327	19.3219	18.5133	19.0872	18.7762	18.7389	18.7028	18.4155	19.1481	18.284	18.3832	18.5519	18.2607	18.3666	18.804	18.5865	18.4357	18.9818	18.2069	18.5703	18.7544	18.4444	18.4971	18.3451	18.2578	18.3462	18.2894	18.4188	18.2475	18.3054	18.6562	18.298	18.3503	18.5111	17.9267	18.2949	18.8074	17.9605	18.5632	18.3094	1.20354	0.0530797	1.20515	0.00318116
P08865	40S ribosomal protein SA	RPSA	32.854	295	20.5894	20.541	20.262	20.2656	20.3349	20.2949	20.7224	20.575	20.5334	20.5151	20.2117	20.673	19.955	20.1475	20.6551	20.1097	20.0504	20.4539	20.3566	20.0245	20.6482	20.3941	20.1643	20.3294	20.2656	20.9739	19.8932	20.1991	20.1941	19.8358	20.5341	20.266	20.0588	20.4261	19.3978	20.1148	20.5906	20.5906	20.363	19.9879	1.1484	0.0531043	1.07341	0.276969
Q92556	Engulfment and cell motility protein 1	ELMO1	83.829	727	17.388	17.2114	17.8407	17.26	17.7673	17.2191	17.3791	17.3324	17.1334	17.323	17.4943	17.5324	17.8309	17.8696	17.5033	17.5923	17.5845	17.3443	17.3295	17.7199	17.4729	17.6388	17.713	17.3543	17.4332	17.9102	17.4137	17.8642	17.6298	17.8723	17.3931	17.5995	17.938	17.5351	17.1579	17.5324	17.8719	17.3358	17.234	17.2805	0.873779	0.0533108	0.948504	0.31008
Q9Y6M9	NADH dehydrogenase [ubiquinone] 1 beta subcomplex subunit 9	NDUFB9	21.831	179	17.8687	18.6306	18.6202	18.1028	18.5851	18.5382	18.369	18.0692	18.1799	18.8729	18.9786	18.6065	18.2738	18.17	18.657	18.958	18.9562	18.5132	18.516	19.342	18.698	18.5827	18.9396	18.6559	18.8457	18.7699	19.4654	18.373	18.7366	18.4402	18.8409	18.6444	18.7253	18.6482	19.8225	18.9757	18.9227	18.1089	18.6343	19.0221	0.804708	0.053402	0.839611	0.0360865
Q96AT9	Ribulose-phosphate 3-epimerase	RPE	24.927	228	17.3732	17.3946	17.5985	17.5145	17.4666	17.2729	17.5319	17.5973	17.3695	17.5357	17.5432	17.5644	17.5587	17.6116	17.6533	17.5422	17.638	17.3983	17.5594	17.4585	17.7223	17.5878	17.6275	17.534	17.4556	17.4712	17.3973	17.3619	17.2669	17.6567	17.6391	17.6282	17.9293	17.5411	17.5938	17.4408	17.8566	17.6079	17.7101	17.7076	0.94128	0.0534815	0.947592	0.0770827
P62847	40S ribosomal protein S24	RPS24	15.423	133	16.0791	15.7473	15.3643	16.1949	16.0203	15.9571	15.8035	15.4955	14.8851	15.9025	15.5418	15.9238	15.6354	14.716	15.0044	15.7088	15.1971	15.8222	14.8184	15.2874	15.5133	15.2328	15.3769	14.9707	15.0312	15.8378	15.2452	15.6432	15.7603	15.2699	15.5978	15.5013	16.065	15.6766	15.108	14.9605	14.8656	14.6859	15.4481	15.3327	1.30083	0.0536005	1.14799	0.12588
P02745	Complement C1q subcomponent subunit A	C1QA	26.016	245	17.0823	16.8172	16.9701	17.225	16.9723	16.714	17.4896	16.9888	16.2524	16.9052	18.5405	17.2409	17.0292	17.3628	17.123	16.8029	17.2573	17.3535	18.7984	16.8351	17.5618	17.0626	16.8569	17.5723	17.3567	17.2375	17.6852	17.5217	17.5225	17.5232	17.4502	17.321	17.0823	17.5196	17.6308	17.2071	17.3618	17.439	17.3498	17.7814	0.710705	0.0538169	0.862057	0.131389
Q9BTT6	Leucine-rich repeat-containing protein 1	LRRC1	59.241	524	16.8319	17.1301	16.6435	17.0843	16.7175	17.2359	16.4925	16.9804	16.9568	16.8252	16.6909	16.7392	16.6417	16.214	16.5172	17.0307	16.3782	16.7582	16.7555	16.9597	16.8137	17.172	16.6635	16.82	16.7509	16.46	16.521	16.945	17.208	17.0816	16.8511	16.9123	16.5354	16.7323	16.289	16.7384	16.4881	16.654	17.1108	16.5856	1.16575	0.0538446	1.00872	0.877882
Q92917	G patch domain and KOW motifs-containing protein	GPKOW	52.228	476	17.033	17.1361	16.7557	16.5778	16.6799	16.4791	16.95	16.962	17.0964	16.4655	16.4083	16.897	16.59	16.1999	16.8469	16.8734	16.4681	16.5964	16.4202	16.6045	16.8253	17.4029	16.744	16.8458	16.077	16.6051	16.4408	16.5393	16.6462	16.2142	16.6076	16.4519	16.364	16.5349	16.3137	16.3291	16.7377	16.4865	17.5807	16.5579	1.16721	0.0538473	1.06201	0.388351
Q9UKU9	Angiopoietin-related protein 2	ANGPTL2	57.104	493	17.0913	16.3684	16.9024	16.7727	16.3103	16.3752	16.9645	16.5733	16.606	16.7086	16.7968	17.0913	16.7324	16.7298	17.2508	16.8365	17.6315	16.5565	17.1058	16.693	16.5733	16.904	16.972	16.5346	16.6489	16.8983	16.7592	16.4763	16.7991	17.024	16.6227	16.6046	17.041	16.3167	17.2694	16.364	16.9251	17.0078	16.3633	17.6213	0.82635	0.0539248	1.01295	0.85785
Q9NNX6	CD209 antigen	CD209	45.774	404	17.2231	17.0008	17.5687	17.4238	17.4143	17.5023	17.4474	17.3715	17.7961	17.2416	17.8841	17.5301	17.362	17.5104	17.6239	17.4312	17.9523	17.5319	17.3144	17.9111	18.0005	18.3098	17.8288	17.8429	17.4693	17.5663	17.5661	17.5281	17.4874	18.2573	17.7083	18.1044	18.1869	17.4388	17.4331	17.6039	19.1675	17.4389	17.4389	17.6607	0.866824	0.0541474	0.812345	0.0105555
Q7Z7G0	Target of Nesh-SH3	ABI3BP	117.89	1068	16.4913	16.5457	17.499	16.3913	16.5458	16.1458	16.2855	16.4712	16.9269	17.8261	17.8	16.7047	17.9113	16.7995	16.5952	16.9875	17.2677	16.5975	18.1129	17.5095	17.611	18.054	17.3595	18.1272	18.1643	17.5888	17.6905	17.9008	18.0459	18.3826	17.6957	17.6761	17.6202	18.3782	18.258	18.3228	18.107	17.2913	17.4716	17.5767	0.699441	0.0542442	0.537605	1.33111e-06
Q9Y303	Putative N-acetylglucosamine-6-phosphate deacetylase	AMDHD2	43.747	409	16.3028	16.2992	16.4589	16.3246	16.3157	15.9047	16.2276	16.5732	16.8342	16.8342	17.1305	16.5267	17.0011	16.1271	16.4888	16.2763	17.0241	16.5293	16.8542	17.1083	17.3556	16.5445	16.3455	16.6578	16.6615	16.7665	16.6548	17.6035	17.7057	17.356	17.3139	16.8838	17.0001	17.2358	16.8778	16.6327	17.226	17.5076	16.3388	16.5444	0.812741	0.0542932	0.755998	0.0022135
Q9NPH2	Inositol-3-phosphate synthase 1	ISYNA1	61.067	558	15.4732	15.4287	16.1311	15.4705	15.7684	15.9848	15.8238	16.1456	15.6041	16.0343	15.9437	15.9219	16.0245	16.0437	16.2378	16.1798	15.8795	15.7041	16.2202	15.8584	16.0464	15.843	16.167	16.4473	16.0738	16.1083	16.3704	16.0004	16.2993	16.1561	16.2851	16.0428	16.2461	16.2444	16.2511	16.0718	16.0651	16.3065	16.1475	16.2065	0.861598	0.0542955	0.826431	0.000137269
P10644	cAMP-dependent protein kinase type I-alpha regulatory subunit	PRKAR1A	42.981	381	17.587	17.6083	17.6427	17.3166	17.9362	17.4179	17.7305	17.9264	17.6994	17.9194	18.0721	18.0891	17.6826	17.9238	17.7681	17.3633	18.2491	18.0226	18.1321	17.704	17.9492	17.8052	17.8091	17.9064	18.0365	18.0108	18.4682	17.7001	17.6617	17.7069	17.7847	18.2185	17.7594	17.855	18.5539	18.0009	17.9616	17.8595	17.7646	18.4661	0.85725	0.0544763	0.88615	0.0432241
P35443	Thrombospondin-4	THBS4	105.87	961	17.4773	17.2713	17.2226	17.59	17.5947	17.3234	17.427	17.5534	17.6016	18.306	19.6175	17.7419	17.6156	17.4674	17.6502	17.4722	18.459	17.7793	19.9966	17.8295	17.9711	17.8186	17.3051	17.9744	17.9168	18.0622	19.1794	17.9428	17.9796	17.9778	17.6173	17.7288	17.7801	17.4377	18.2494	18.1445	17.7916	17.9453	17.9886	19.2307	0.647883	0.0546957	0.899844	0.440086
Q6FI81	Anamorsin	CIAPIN1	33.582	312	17.436	17.3333	16.9081	17.7227	17.026	17.3851	17.0888	16.9998	17.3745	16.6336	16.5245	17.2336	16.9181	16.6407	17.332	17.1461	16.8771	17.1883	16.607	16.5963	16.8109	16.7765	16.8288	16.5419	16.4178	16.7866	17.3034	16.5038	16.6536	16.311	16.7311	16.5253	16.434	16.5072	16.378	16.5967	16.6028	16.4185	16.9084	16.5611	1.21791	0.0549344	1.33672	4.52767e-05
P58546	Myotrophin	MTPN	12.895	118	19.1471	19.1934	18.9635	19.3064	19.1289	19.3991	19.3051	19.0501	18.8273	18.5539	18.9048	18.8755	18.9578	18.8396	18.3641	19.076	18.8005	19.3689	18.4432	18.7539	18.9728	18.9246	18.9635	18.648	18.6869	18.4879	18.5615	19.0988	19.1102	18.2481	18.7765	18.5601	18.5872	18.9676	18.2346	18.7476	18.4463	18.6215	19.0513	18.956	1.18843	0.0549911	1.17318	0.0133615
Q16610	Extracellular matrix protein 1	ECM1	60.673	540	18.3822	17.8404	18.2635	18.4159	18.2631	18.2202	18.1916	18.0129	18.1837	18.1695	18.3785	18.5892	18.2016	19.0595	18.2459	18.4974	18.2829	18.2892	18.3249	18.1289	19.0725	18.9389	18.135	18.7434	18.2244	18.2571	18.2778	19.4562	18.974	18.5378	18.2198	18.3325	18.6319	18.4817	18.4196	18.0275	18.1403	18.9525	19.7049	18.3983	0.867241	0.0549977	0.812678	0.0139059
Q01081	Splicing factor U2AF 35 kDa subunit	U2AF1	27.872	240	19.0432	19.4125	18.8127	18.4951	18.6793	19.1686	19.2089	19.192	18.2256	18.4249	18.0765	18.7672	18.8	18.6239	18.2489	19.094	18.2032	18.8467	17.918	18.5046	18.0755	18.5016	18.8041	18.3775	18.3057	18.2078	17.7648	18.4158	18.4042	17.9424	18.4013	18.1161	18.0861	18.6224	17.5319	18.8091	18.183	18.3473	18.4916	17.6012	1.28163	0.0551913	1.35454	0.00098829
O00499	Myc box-dependent-interacting protein 1	BIN1	64.699	593	18.0649	18.0954	18.46	18.5756	18.2662	17.8114	18.0804	18.1079	18.0393	18.1767	18.2168	18.3039	17.9508	19.8218	18.832	18.0554	20.3003	18.6886	18.7539	18.0653	18.2008	19.1425	18.5935	18.2005	18.4207	18.3193	20.2196	18.6679	18.2641	18.4901	18.0288	18.3324	18.3061	18.0067	20.2807	18.1594	18.3969	18.836	18.0673	20.1316	0.69203	0.0552466	0.858624	0.311348
P02790	Hemopexin	HPX	51.676	462	20.2438	19.9688	21.3541	20.6025	20.4937	20.2637	20.4687	20.2003	20.2023	20.9342	21.2297	20.548	20.9257	21.2198	20.7889	20.1776	20.8328	20.4402	21.2316	20.8493	21.4533	20.9456	21.0537	21.6865	21.6188	21.0134	21.0678	21.6341	21.8491	21.1276	21.2891	21.1123	20.9735	21.8692	20.4228	21.3289	21.2441	21.6545	21.3597	21.1016	0.783958	0.0554156	0.641049	6.37447e-06
Q9BTU6	Phosphatidylinositol 4-kinase type 2-alpha	PI4K2A	54.022	479	17.3018	17.0916	17.3237	17.2121	17.5905	17.3324	17.0969	17.1108	17.202	17.1187	17.3914	17.4819	17.3438	17.2138	17.9281	17.0413	17.4005	17.4753	17.3057	17.6688	17.5924	17.406	17.4879	17.3879	17.2078	17.6127	17.362	17.3244	17.258	17.9106	17.3981	17.5085	17.8635	17.2395	17.4344	17.162	17.8303	18.0068	17.4943	17.6881	0.87842	0.0555246	0.884419	0.0210681
Q08170	Serine/arginine-rich splicing factor 4	SRSF4	56.678	494	17.551	18.0346	16.5734	16.9735	17.6132	17.6948	17.6715	17.4437	17.3165	17.0857	16.8299	17.0701	17.0477	16.8167	16.8902	17.5049	16.9029	17.6132	16.7627	17.1912	17.3209	16.959	16.8349	17.0637	16.9335	17.4843	16.9522	16.9811	17.0892	17.0425	17.6682	17.0111	16.5838	17.2762	17.3348	17.144	17.1701	16.6742	17.2246	16.9067	1.25948	0.0555585	1.10698	0.171556
Q08378	Golgin subfamily A member 3	GOLGA3	167.35	1498	18.0713	18.1722	17.9446	18.1259	17.7459	18.0355	18.1125	17.979	17.9675	18.1398	18.0713	18.1667	18.1309	18.1354	18.0823	18.1944	17.9434	18.1976	18.099	18.2868	18.1193	18.2395	17.9466	18.0911	18.1614	18.0781	17.9149	17.9535	17.9024	17.8473	17.8747	18.1643	17.8894	17.9466	17.799	18.0429	17.8784	17.8206	17.9749	17.8563	0.932168	0.0556068	1.07552	0.0109108
O75489	NADH dehydrogenase [ubiquinone] iron-sulfur protein 3, mitochondrial	NDUFS3	30.241	264	17.5837	17.4754	17.8891	17.5476	17.5974	17.7816	17.6182	17.5126	18.1473	17.6954	17.6911	18.2047	17.5438	18.0371	18.2833	18.215	18.0984	17.4264	18.0227	17.7047	17.6438	17.7061	18.0981	17.9231	17.8567	17.9636	18.6367	17.7456	17.6961	17.733	17.7384	17.8281	18.0044	17.6682	19.0048	18.1046	17.9648	17.6394	17.707	18.1679	0.847982	0.0559222	0.90893	0.17598
Q9Y3E5	Peptidyl-tRNA hydrolase 2, mitochondrial	PTRH2	19.193	179	17.4014	17.2418	16.9317	17.0529	17.4288	17.0183	16.6449	16.6382	16.3004	17.1509	16.6939	17.0818	16.792	16.6966	16.6113	16.8556	16.7064	16.7281	16.3911	16.6533	16.4786	16.5661	16.8775	16.6571	16.6639	16.4214	16.9008	16.9023	16.6502	17.1465	16.4801	16.5315	16.3564	16.5849	16.2995	16.816	16.3895	16.3806	16.4556	16.4569	1.1974	0.056016	1.18938	0.00561531
Q86XP3	ATP-dependent RNA helicase DDX42	DDX42	102.97	938	18.2425	18.2966	18.0514	18.0692	17.9072	18.1658	18.1943	18.303	18.3374	18.3501	18.2522	18.4659	18.2522	18.2563	18.2321	18.2795	18.4586	18.1575	18.2633	18.5126	18.4603	18.1779	18.0291	18.229	18.3722	18.4176	18.0877	18.2284	18.4188	18.1623	18.4128	18.4076	18.1481	18.3312	18.0201	18.3572	18.2321	18.0932	18.2088	18.1181	0.919391	0.056304	1.00469	0.881793
Q96BJ3	Axin interactor, dorsalization-associated protein	AIDA	35.023	306	16.6639	16.8713	16.897	16.2874	16.4147	16.81	17.3533	17.0637	16.3522	16.5263	16.894	16.7708	17.315	16.7884	16.7848	16.743	17.1987	17.0115	17.0153	17.3995	17.0566	16.9177	16.6309	17.1822	17.0927	17.1468	16.5728	16.9254	16.7073	17.2342	17.0418	16.996	17.0076	16.9515	17.7759	16.95	17.2502	17.158	16.8058	16.4471	0.830404	0.0564425	0.911001	0.168834
P36269	Gamma-glutamyltransferase 5	GGT5	62.26	586	17.8158	17.6012	17.8724	17.9274	17.9479	17.5296	17.9659	17.688	17.6468	18.5151	18.1616	17.9482	18.5205	17.4481	18.0247	18.1726	18.3876	18.0344	18.123	18.2917	18.1178	18.404	18.0724	18.3202	18.1882	17.7979	17.8679	18.0619	18.4491	18.7698	18.0427	18.2467	18.5623	18.3724	18.174	18.1366	18.5638	18.2083	17.9782	17.8378	0.834944	0.0565237	0.854126	0.0155983
Q6P1M0	Long-chain fatty acid transport protein 4	SLC27A4	72.063	643	17.716	17.2394	16.7562	17.5516	17.5776	17.6651	17.4301	17.1192	17.5754	16.5895	16.8726	17.3912	16.6216	16.6853	17.1535	17.3117	16.9163	17.4404	16.6177	16.9876	17.3903	17.4493	16.7893	17.0215	16.6033	17.4501	16.8445	17.2645	17.2215	17.1079	17.1613	16.7346	17.0395	17.5226	16.8331	16.5493	17.0902	16.8571	17.2998	16.9833	1.25026	0.0565731	1.07195	0.353694
Q92796	Disks large homolog 3	DLG3	90.313	817	14.6593	14.5418	15.0624	14.7064	14.714	14.9017	14.5733	14.6903	14.5701	15.4289	15.5736	15.0224	14.8452	14.9658	15.418	14.7225	15.0038	14.4471	15.352	15.4076	15.4771	14.8588	14.8607	15.0901	15.3364	15.3687	15.0692	15.5233	15.4208	15.6819	15.4194	15.3678	15.3851	15.1805	15.0327	15.4139	15.3903	15.5104	15.0074	14.9883	0.817342	0.0565893	0.790686	0.000861418
Q15843	NEDD8	NEDD8	9.0714	81	16.4015	16.6835	16.3169	16.8258	16.4461	16.4601	16.2604	16.5844	16.3734	16.3144	15.8872	16.2512	16.1596	16.2263	16.5128	16.8788	16.1703	16.2367	15.8595	16.2777	15.8224	16.1404	16.6042	15.9328	15.8806	15.7386	15.9053	15.8442	16.0728	15.656	15.9344	16.1416	15.8994	15.744	16.0135	15.9337	15.9683	15.6552	15.9661	16.1184	1.16526	0.0566177	1.32661	3.49401e-06
Q03135	Caveolin-1	CAV1	20.471	178	19.1928	18.3147	18.8453	19.2208	19.2852	18.6647	18.9534	18.7542	19.5114	19.3392	19.5002	19.6461	19.2711	18.7301	19.4327	19.2285	19.2769	19.6873	19.4601	18.9138	19.4029	19.6385	19.2138	19.6596	19.3649	18.8264	19.4207	19.3135	19.9787	19.6417	19.2925	19.3412	19.5311	19.6629	19.0986	19.1368	19.3263	19.5144	19.2799	19.3567	0.808602	0.0569329	0.847554	0.0204866
Q96A33	Coiled-coil domain-containing protein 47	CCDC47	55.873	483	17.5257	17.3234	17.4707	17.274	17.2708	17.4663	17.4553	17.4421	16.9081	17.4992	17.0537	17.2894	17.4013	17.1734	17.3354	17.0413	16.9378	17.2224	17.4292	17.1715	16.99	17.1136	17.392	17.1784	17.2956	17.0746	17.1726	17.0235	17.0092	17.0071	16.9187	17.0974	17.2853	16.9628	17.1204	17.1896	17.166	17.2192	17.2181	17.1376	1.11573	0.0570435	1.11416	0.00346791
Q07020	60S ribosomal protein L18	RPL18	21.634	188	18.7598	19.0022	17.8881	18.7022	18.5452	18.7138	18.7911	18.4836	18.3505	18.7263	18.6866	18.4467	18.184	17.6244	18.2601	18.6719	18.0206	18.5031	18.1149	18.5424	18.6401	18.4319	18.1048	18.2345	18.1983	19.1042	18.4763	18.0548	18.2018	18.0205	18.8914	18.2903	17.747	18.7644	17.889	18.2952	18.2664	17.7156	18.5291	18.5631	1.22332	0.0570665	1.09425	0.253433
Q14314	Fibroleukin	FGL2	50.228	439	17.6216	17.8006	18.1992	17.3529	17.5631	17.3422	17.3363	17.7334	17.7213	18.1584	18.318	17.7586	18.2764	18.4426	18.1317	17.782	17.7273	17.3766	17.9042	18.0147	17.7671	17.9886	18.3141	17.9229	18.0386	17.9154	17.9203	17.9248	18.4397	17.9412	17.94	17.83	18.4928	17.7468	17.971	18.3615	18.1786	17.7657	17.5876	17.5	0.817738	0.057103	0.901695	0.133415
Q92615	La-related protein 4B	LARP4B	80.551	738	16.9106	16.3878	17.1664	17.0746	16.7996	17.4523	16.5337	17.0071	17.1413	16.4911	16.7108	16.2058	16.9817	16.4198	15.9675	16.4882	16.49	17.1973	16.613	16.7226	16.6863	16.8599	16.3101	16.424	16.2948	16.8764	16.5293	16.6107	16.7088	16.5819	16.7095	17.2385	16.9287	16.8126	16.4736	16.2717	16.675	16.8579	16.8138	16.6777	1.24554	0.0572383	1.05044	0.481948
Q9NUL3	Double-stranded RNA-binding protein Staufen homolog 2	STAU2	62.608	570	16.8516	17.0447	16.1636	16.6919	16.3808	17.1222	17.0099	16.8522	16.8278	16.3749	16.3814	16.4047	16.7195	16.3529	16.3638	16.8508	16.5468	16.6316	16.2113	16.4326	16.7891	16.6894	16.2524	16.5847	16.2359	16.4142	16.707	16.5924	16.5514	16.2358	16.5594	16.5816	16.4547	16.7327	16.6134	16.3127	16.2387	16.2252	16.8198	16.3835	1.18298	0.0572404	1.08076	0.161335
P15336	Cyclic AMP-dependent transcription factor ATF-2	ATF2	54.537	505	13.7134	13.9628	13.3897	12.9272	13.1038	13.8961	13.2768	13.1634	13.1278	13.1349	12.7146	13.1595	13.427	12.5091	12.685	13.7593	12.8398	13.4016	12.6075	13.0575	12.8489	13.0624	13.1689	12.951	13.2249	13.0438	13.0575	12.9128	12.7926	13.3908	13.1563	13.0835	13.2594	12.9348	12.3885	13.456	13.1094	12.3899	13.0891	13.0035	1.27764	0.0573006	1.13025	0.122024
O76041	Nebulette	NEBL	116.45	1014	13.0447	13.8004	13.28	12.9442	12.9926	12.891	13.2005	13.4599	13.6262	13.3168	13.8715	13.4318	13.17	13.7967	13.6924	13.5179	13.3756	12.9734	13.749	13.6698	13.6575	13.2691	13.1926	13.6634	13.5392	13.379	13.4285	13.8645	13.6458	14.1509	13.5657	13.7094	13.5401	13.759	13.1212	13.689	13.4791	13.3138	13.7177	13.4344	0.829787	0.0573087	0.891444	0.072568
Q16647	Prostacyclin synthase	PTGIS	57.103	500	17.5106	17.6149	19.527	17.809	17.9685	17.6463	17.6877	17.9583	18.1022	17.8989	18.5592	18.1476	18.6285	18.1676	18.7691	17.8182	19.0185	17.9063	18.7532	18.4518	19.0264	18.6866	19.5952	18.3863	18.498	18.6284	18.6597	18.5779	18.3029	19.7922	18.533	18.623	19.7888	18.2638	18.4023	19.5963	19.5476	19.2867	18.0583	18.6758	0.732212	0.0573324	0.637587	0.000533613
Q9NYK5	39S ribosomal protein L39, mitochondrial	MRPL39	38.711	338	18.0967	18.467	18.1401	17.7397	18.2995	18.1195	18.0848	18.0415	18.578	17.9888	17.9879	18.089	18.0228	17.6508	18.0414	18.0645	17.9987	18.0678	17.6938	18.0841	18.2438	18.4897	18.0512	18.1542	17.9968	18.2297	18.337	18.0781	18.0692	17.9716	18.2878	18.1342	18.1204	18.219	18.3944	18.3884	18.0904	18.096	18.2949	18.2444	1.13719	0.05762	0.912729	0.030465
P49748	Very long-chain specific acyl-CoA dehydrogenase, mitochondrial	ACADVL	70.389	655	19.8489	19.7448	20.3672	19.7323	19.8939	19.8247	20.1131	19.7776	20.0314	20.4048	20.5155	20.0722	20.0952	20.2288	20.0605	19.8442	20.3645	20.023	20.2875	20.2701	20.2428	20.2821	20.3612	20.5383	20.4487	20.2629	20.85	20.265	20.399	20.3147	20.4644	20.5038	20.3481	20.1255	20.7219	20.7044	20.3588	20.3792	20.3965	20.5697	0.869165	0.057655	0.783584	6.29838e-06
O00217	NADH dehydrogenase [ubiquinone] iron-sulfur protein 8, mitochondrial	NDUFS8	23.705	210	16.249	16.5174	16.4999	16.1042	16.2509	16.5518	16.5974	16.7854	16.3013	16.6312	17.017	16.3131	16.7832	16.6924	16.3089	17.0629	16.7752	16.3764	16.7832	16.5858	16.5209	16.5145	16.4442	16.748	16.6627	16.6275	17.6972	16.7049	16.8376	16.5912	16.6933	16.8555	16.6983	16.7051	17.8191	17.0882	16.7113	16.3327	16.6595	16.5654	0.858002	0.0577423	0.861833	0.0421076
Q8N201	Integrator complex subunit 1	INTS1	244.29	2190	17.3014	17.2729	17.3735	17.8246	17.4345	17.5186	17.462	17.3748	17.5883	17.006	17.1285	17.4981	17.289	17.0968	17.2504	17.38	17.2432	17.4147	17.003	17.159	17.1805	17.2326	17.3436	17.155	17.1489	17.157	17.1402	17.2611	17.2456	17.0202	17.0836	17.4134	17.5819	17.1705	17.5179	17.1306	17.2279	17.3223	17.155	17.4387	1.12459	0.057877	1.06043	0.138088
P18124	60S ribosomal protein L7	RPL7	29.225	248	19.6972	19.6891	19.4025	19.3991	19.442	18.807	19.683	19.5728	19.5011	19.424	19.5172	19.4081	19.1617	18.6649	19.1515	19.4629	18.9599	19.5487	18.7474	19.3627	19.7112	19.4467	19.22	19.4106	19.2589	20.2301	18.9061	19.4598	19.4789	19.3662	19.6891	19.2648	19.3585	19.7173	18.7781	19.5569	19.6074	18.6351	19.6024	18.9639	1.20023	0.0579459	0.963959	0.626724
Q05209	Tyrosine-protein phosphatase non-receptor type 12	PTPN12	88.105	780	16.0925	15.6789	15.6448	16.0592	16.1	15.7477	16.1419	15.8625	15.6191	15.2497	15.2833	15.9523	15.5486	15.7067	15.4915	15.5392	15.5352	15.9098	15.4096	15.5527	15.892	15.8356	15.5961	15.4431	15.3643	15.5534	15.3645	15.5527	15.5928	15.6655	15.6291	15.3327	15.7385	15.6218	15.1523	15.4462	15.6695	15.7671	15.5448	15.3398	1.17018	0.0580171	1.11048	0.0464773
P43487	Ran-specific GTPase-activating protein	RANBP1	23.31	201	19.2465	19.4239	18.9062	19.3704	19.0213	19.2917	18.9669	18.9052	19.1196	18.4193	18.5913	18.9934	18.8559	18.6024	18.6324	19.2629	18.7572	19.0241	18.5623	18.9704	18.7198	18.6296	18.7626	18.4797	18.4905	18.6796	18.6123	18.7777	18.9316	18.7438	18.7564	18.7786	18.8002	18.6504	18.3542	18.6463	18.623	18.6485	18.7559	18.7587	1.18254	0.0580551	1.20263	0.000565125
P39019	40S ribosomal protein S19	RPS19	16.06	145	19.3717	19.2496	18.9524	19.187	19.1733	19.1095	19.2135	19.1639	19.4425	19.1544	19.1823	19.2109	18.6278	18.7716	19.2453	19.1453	18.6561	19.1536	18.8889	19.2891	19.2432	19.0309	19.0511	18.9299	18.752	19.498	18.5733	18.7395	18.8642	18.3686	19.2021	18.8295	18.6848	19.171	18.1175	19.0309	19.2228	18.1363	19.1961	18.5684	1.13655	0.0580764	1.18833	0.0143122
Q9NYF8	Bcl-2-associated transcription factor 1	BCLAF1	106.12	920	17.7338	17.997	17.084	17.4558	17.3391	18.0336	17.6588	17.4202	17.5496	17.3224	16.9474	17.667	17.3485	17.296	17.5171	17.5359	17.0964	17.4731	16.9685	17.2551	17.1957	17.3055	17.1883	17.189	17.1446	17.545	17.3297	17.2823	17.4772	16.8485	17.5593	17.3468	16.9876	17.2257	17.1278	17.5075	17.0923	17.1955	17.4018	17.6166	1.18832	0.0583	1.11469	0.0575426
P05155	Plasma protease C1 inhibitor	SERPING1	55.154	500	17.8604	17.8493	18.6134	18.0731	17.9229	17.7842	18.0416	17.7774	17.7504	18.3844	18.6593	18.0875	18.1653	19.134	18.144	17.6673	18.3933	18.0323	18.7567	18.2704	19.1003	18.7005	18.39	19.3903	19.1295	18.4813	18.6233	19.1496	19.0359	19.0882	18.5196	18.6706	18.3662	19.0284	18.1019	18.7402	18.7524	19.1528	18.6763	18.4212	0.798137	0.0583445	0.6563	5.96199e-06
Q9BS26	Endoplasmic reticulum resident protein 44	ERP44	46.971	406	18.079	18.0089	17.6324	17.9928	17.6169	17.6444	17.8016	17.6687	17.2058	18.1303	17.7381	17.4344	17.6005	17.428	17.1865	17.6244	17.3207	17.8796	17.7101	17.6103	17.532	17.617	17.5611	17.597	17.8641	17.6124	17.2578	17.4562	17.4572	17.5625	17.5176	17.6895	17.6806	17.4887	17.3414	17.8599	17.4677	17.4618	17.5008	17.3553	1.16863	0.0583545	1.08797	0.0863375
Q9H488	GDP-fucose protein O-fucosyltransferase 1	POFUT1	43.955	388	16.9379	16.9672	16.603	16.6894	16.1477	16.7306	16.57	16.6051	16.932	16.4227	16.5025	16.4165	16.756	16.2448	15.9998	16.3775	16.5379	16.5573	16.6036	16.5034	16.549	16.4999	16.3743	16.4986	16.7623	16.753	16.7967	16.2591	16.4431	16.5314	16.4639	16.4659	16.3346	16.4537	16.5674	16.8076	16.7721	15.9916	16.2612	17.1904	1.1572	0.0584307	1.01147	0.839286
P50613	Cyclin-dependent kinase 7	CDK7	39.038	346	15.8635	15.993	15.6908	15.964	15.7623	15.8703	16.0232	15.898	16.1304	15.4337	15.354	15.7986	15.6944	15.2774	15.8106	16.0339	15.7393	15.7639	15.6059	15.6569	15.5422	15.8421	15.8255	16.0048	15.7181	15.869	15.7879	15.7293	15.7081	15.7596	15.6767	15.5677	15.6035	15.7376	15.2822	15.7701	16.1803	15.6003	15.9357	15.5805	1.14029	0.0584488	1.02253	0.629306
P20290	Transcription factor BTF3	BTF3	22.168	206	17.879	18.1644	17.2471	17.9931	17.4262	17.6938	17.685	17.8952	18.3232	17.5705	17.6361	17.6142	17.3922	17.3035	17.4633	17.8057	17.7036	17.5942	17.4766	17.5738	18.2584	17.7728	17.2957	17.8582	17.454	17.6977	17.6037	17.9911	18.2041	17.9932	18.1974	17.789	17.5858	18.2542	18.0262	17.4721	17.5501	17.9488	18.4378	17.3751	1.17399	0.0585327	0.891168	0.0929417
P27482	Calmodulin-like protein 3	CALML3	16.891	149	20.3224	20.6207	18.5026	19.7583	18.7845	19.8057	18.8184	19.6862	19.7612	18.1255	18.3336	18.9342	18.647	18.518	18.9163	18.7776	18.481	20.1793	18.298	18.8563	19.4259	19.3909	18.5924	19.2987	18.2377	18.4856	18.3306	19.4231	19.799	19.1392	18.9959	18.5409	18.3765	19.3891	18.1764	18.1968	18.4955	18.7949	20.0289	18.3382	1.54159	0.0585357	1.1757	0.27392
Q30201	Hereditary hemochromatosis protein	HFE	40.108	348	12.2597	12.3871	12.2694	12.4255	12.2811	11.7588	11.9723	12.3178	12.7475	12.3584	12.5362	12.377	12.3589	12.5037	12.5727	12.2156	12.8346	12.2019	12.5748	12.7427	13.1895	13.0777	12.3179	12.8521	12.5539	12.3236	12.6779	12.5146	12.4345	12.8925	12.7229	12.649	12.5727	13.3526	12.6584	12.3017	12.8261	12.6714	12.8521	13.1568	0.862124	0.0587832	0.787252	0.00035055
P01116	GTPase KRas	KRAS	21.656	189	17.5783	17.6932	17.365	17.434	16.8643	17.4654	17.0463	17.0951	17.0789	17.2472	17.6258	17.0351	17.6511	17.5792	17.228	17.8916	17.4977	17.5378	17.4497	17.6402	17.6705	17.6611	17.198	17.6616	17.5552	17.5303	17.6325	17.9139	17.4797	17.6361	17.7894	17.7749	17.3769	17.8044	17.3373	17.7519	17.8011	17.1588	17.7969	17.9887	0.854509	0.0588193	0.855141	0.00668782
P14735	Insulin-degrading enzyme	IDE	117.97	1019	19.4342	19.1439	19.4478	19.2263	19.4441	19.4846	18.9054	19.0332	19.3741	19.0512	19.0632	19.0045	19.1556	18.8423	18.9714	19.2726	18.9529	19.1119	19.2176	19.3045	19.1153	19.2447	19.2222	18.9839	18.9353	19.25	19.2038	19.1011	19.0771	19.0292	19.1295	19.1502	19.4202	19.0471	18.9412	18.9771	19.0851	19.2544	19.2024	19.1817	1.12102	0.0588437	1.03132	0.39753
P23297	Protein S100-A1	S100A1	10.546	94	16.0326	15.7641	16.7907	16.7065	16.1026	15.9174	16.0806	16.0646	16.5163	17.9151	17.3073	16.3557	16.6456	17.2858	16.4725	16.2216	18.532	16.3073	18.2478	17.1016	16.5733	16.571	16.7689	16.6981	17.5866	16.3785	18.3376	16.8508	16.5583	16.8926	16.154	17.8479	16.7427	16.3788	19.1807	17.6096	16.4079	17.0579	16.5724	18.3326	0.633465	0.0589166	0.780989	0.16612
P48739	Phosphatidylinositol transfer protein beta isoform	PITPNB	31.54	271	19.5132	19.5294	18.9978	19.5387	18.9938	19.5445	19.3308	19.4222	19.2461	19.0663	19.0308	18.6421	19.5019	18.7901	18.7403	19.3192	19.0685	19.6803	18.8947	18.8921	19.2566	19.1179	18.6295	18.8965	18.9078	19.2686	18.7196	19.2035	19.1666	18.8417	19.265	19.1557	19.1882	19.1467	18.5344	18.8453	19.1113	18.7233	19.1245	18.6602	1.1994	0.0589391	1.1479	0.0299336
Q96I15	Selenocysteine lyase	SCLY	48.148	445	15.8614	15.717	16.2757	16.1528	15.8279	16.008	15.7187	15.6884	15.6161	16.554	16.2217	15.6549	16.6214	16.421	15.9483	16.1819	16.246	16.4405	16.2369	16.0477	16.0188	16.1917	16.1343	15.9252	16.3476	16.3976	16.2774	16.4688	16.2089	16.5629	16.0428	16.4716	16.407	16.2278	16.2295	16.4603	16.0945	15.7007	16.0538	16.0219	0.835071	0.0589922	0.907427	0.107131
P49590	Probable histidine--tRNA ligase, mitochondrial	HARS2	56.888	506	13.9326	13.7501	13.9343	13.3444	13.7617	13.9959	13.9316	14.2282	13.7342	14.0471	13.4935	13.7475	13.6125	13.3505	13.8575	13.5539	14.0467	13.6388	13.5426	13.8224	14.1504	13.8074	14.0432	13.9436	13.7208	13.9436	14.0069	13.7229	13.7605	13.5678	13.9711	13.6395	13.8894	13.9796	14.2416	13.894	14.1179	13.7992	14.0721	13.631	1.14824	0.0590692	0.914584	0.0642416
Q9NNW7	Thioredoxin reductase 2, mitochondrial	TXNRD2	56.506	524	16.9287	17.1188	18.1737	17.1003	17.2354	17.2319	17.0757	17.2673	17.0115	17.5207	17.4684	17.2291	17.5434	17.4978	17.6726	17.7955	17.1671	17.4121	17.7049	17.9101	16.8951	17.2378	18.2844	17.6096	17.8309	16.9866	17.367	18.418	18.4695	17.9356	17.2869	17.4897	17.2642	17.042	17.5709	18.4903	17.1759	16.6313	17.0587	17.1896	0.827204	0.059128	0.92759	0.456771
Q7Z304	MAM domain-containing protein 2	MAMDC2	77.555	686	12.3203	11.8179	12.5685	12.3228	11.8226	12.1797	12.0814	12.0209	12.0083	12.9965	13.0216	12.0045	12.9781	12.9281	12.0045	12.4495	12.4152	12.5158	12.8738	12.3085	11.9736	12.5772	12.4804	12.1674	12.6978	12.205	13.1344	12.5844	12.8099	12.8009	12.6349	12.3606	12.3606	12.805	12.4867	12.8512	12.7261	12.2946	12.3417	12.3372	0.792188	0.0591954	0.901528	0.181405
Q8NC56	LEM domain-containing protein 2	LEMD2	56.974	503	16.7594	17.1381	16.2432	16.6981	16.1972	16.9933	16.8889	16.6444	16.6818	16.2777	16.1655	16.3777	16.5266	16.2174	16.1034	16.8688	16.2051	16.9383	16.0517	16.1981	16.3824	16.3109	16.2865	16.3856	16.2225	16.5736	16.5335	16.1097	16.2984	16.5241	16.6212	16.0089	16.2373	16.6248	16.5076	16.3393	16.0905	15.9581	16.6016	16.695	1.22007	0.0592482	1.10433	0.123529
Q7Z6B0	Coiled-coil domain-containing protein 91	CCDC91	49.971	441	13.3697	13.4794	13.6511	13.6896	13.4969	13.282	13.2259	13.3522	13.1894	13.765	13.3288	13.4995	13.5305	14.0282	13.901	13.7512	13.272	13.9834	13.6246	13.6747	13.2327	14.0609	13.5504	13.5263	13.5599	13.0494	13.6125	13.3912	13.2711	13.8919	13.1817	13.4045	13.2666	13.3109	13.383	13.608	13.3206	13.2987	13.6246	13.573	0.864976	0.0594007	1.07093	0.21149
Q92982	Ninjurin-1	NINJ1	16.345	152	13.8369	13.7736	13.7912	14.5836	15.1317	14.1046	13.7893	13.976	14.5882	13.6472	14.1438	13.6733	13.9554	13.2265	13.0201	13.6382	13.8808	14.1427	13.9344	13.7333	13.8369	14.3326	13.8567	14.0132	13.7358	13.381	13.7548	13.6472	13.7481	14.4155	14.1438	14.1528	14.6064	13.9771	14.0652	13.8276	14.1511	13.8587	14.0702	13.5961	1.30802	0.0597524	0.97942	0.808638
P28482	Mitogen-activated protein kinase 1	MAPK1	41.389	360	17.7581	18.6236	17.7098	18.3294	18.1386	17.5743	17.9658	17.9116	18.0991	17.8526	17.7335	17.8939	17.8185	17.7224	17.8981	17.6138	17.8169	17.6924	17.6737	17.9812	17.8357	18.7962	17.8185	17.8217	17.8146	17.7673	17.5879	18.0347	17.9369	17.751	17.7715	17.6543	17.8494	17.7683	17.4286	17.6406	17.9646	17.5531	18.0121	17.3188	1.15816	0.0600621	1.06002	0.341616
Q9NZJ4	Sacsin	SACS	521.12	4579	16.5337	15.6029	16.1974	15.9164	15.8658	15.6318	15.308	15.0993	15.5566	15.4554	16.4735	16.5242	16.1496	16.5883	15.9696	15.3107	17.3724	15.7149	16.4326	15.405	16.3318	16.6027	16.3223	16.3562	15.9803	17.2131	16.4287	17.4506	17.864	15.967	16.0692	16.4746	16.8714	16.0286	16.4062	15.6481	16.2096	17.0612	17.5935	16.3992	0.718297	0.0601158	0.655878	0.0021396
Q9NR31	GTP-binding protein SAR1a	SAR1A	22.367	198	16.8308	16.3051	16.4266	16.3884	16.1915	16.6829	16.3912	16.6533	16.3439	16.6155	16.2456	16.3338	16.5414	15.9555	15.9657	16.0778	16.2456	16.538	16.5441	16.4397	16.1521	16.5205	16.3253	16.4233	16.6237	16.6426	16.1569	16.1309	16.1432	16.3346	16.1013	16.4047	16.4643	16.1531	16.4538	16.4652	16.1867	16.1695	16.3575	16.1147	1.1441	0.0601258	1.04943	0.294266
Q92598	Heat shock protein 105 kDa	HSPH1	96.864	858	20.1117	20.9252	19.9991	20.4044	20.3324	20.1951	19.7905	19.8411	20.0431	19.4853	19.792	19.7999	19.6403	19.7781	20.2347	19.9085	19.816	20.1149	19.5961	19.6312	19.8155	19.6943	19.9376	19.6556	19.5994	19.6284	20.6531	19.8804	19.6792	19.8192	20.0152	19.7742	19.728	19.7963	19.8219	19.7772	19.816	19.7368	19.9455	20.3275	1.21556	0.0602499	1.08441	0.219948
Q96RN5	Mediator of RNA polymerase II transcription subunit 15	MED15	86.753	788	13.9887	14.1392	13.9459	14.2117	14.3071	14.1902	14.2297	14.2228	14.4133	14.3768	13.5121	13.8045	14.0282	14.6058	14.2079	14.2719	13.6603	13.8778	13.4336	14.118	13.7491	13.6914	13.8752	13.6935	13.7559	13.5334	13.4862	13.8471	13.9408	13.3127	13.8626	13.9956	13.7929	13.8286	13.6614	13.9221	13.7559	13.5064	13.7682	13.6999	1.18965	0.0602827	1.26868	7.47594e-05
P39060	Collagen alpha-1(XVIII) chain	COL18A1	178.19	1754	18.0825	18.0434	18.3451	18.3952	18.3001	17.9193	17.967	18.1866	17.9592	18.4501	18.3468	18.2795	18.2297	19.2447	18.496	18.3179	18.4625	18.0709	18.4361	18.1662	18.1584	18.2862	18.2584	18.3763	18.2971	17.9986	18.227	18.1284	18.6686	18.6958	18.3764	18.2231	18.3154	18.2803	18.0471	18.1844	18.3763	18.2942	18.1056	18.2003	0.846648	0.0603527	1.00699	0.894668
P62888	60S ribosomal protein L30	RPL30	12.784	115	19.4206	19.4137	18.5384	19.2469	19.4986	19.3906	19.6053	19.3557	19.1232	19.1396	19.0654	19.3134	18.8382	17.8784	19.2672	19.1675	18.7635	19.3553	18.8376	18.9266	19.2727	18.9777	18.9898	18.7467	18.5983	19.1804	18.548	18.9456	19.0272	18.6492	19.3134	18.9449	18.8716	19.2063	18.4963	18.7827	18.7597	18.4186	19.1304	18.3586	1.2587	0.0603736	1.18622	0.0307773
P51178	1-phosphatidylinositol 4,5-bisphosphate phosphodiesterase delta-1	PLCD1	85.664	756	11.2846	11.3514	11.587	11.7036	11.4512	11.008	11.3373	11.3373	11.053	11.9678	12.6604	11.3514	11.8585	10.9099	11.7786	12.0631	11.3429	11.8927	12.442	11.5775	12.0933	11.6844	11.5069	11.6836	11.6605	11.3731	11.5775	11.8119	12.0967	12.1813	11.9167	11.6023	11.737	11.8912	11.2296	11.6403	11.6181	11.8189	11.9541	11.3941	0.768657	0.0605216	0.916586	0.287615
Q99471	Prefoldin subunit 5	PFDN5	17.328	154	18.215	18.1803	17.5644	18.3411	18.3649	18.4377	18.2217	18.3463	18.359	17.8168	18.3135	17.915	17.7561	17.1066	17.7211	18.2184	17.8439	18.5341	17.5586	17.7589	18.0038	17.9579	17.6036	17.7917	17.7385	17.7404	17.5157	17.6698	17.7315	17.8406	17.949	18.292	18.0927	18.0673	17.9631	17.7555	17.7336	17.6489	17.8167	17.5061	1.24151	0.0606822	1.15489	0.0354284
P01024	Complement C3	C3	187.15	1663	21.7781	21.3796	23.1176	21.9715	22.1186	21.9057	22.15	21.9608	21.796	22.8036	23.0368	22.324	22.9331	22.9331	22.5768	21.7265	22.351	21.9537	23.0896	22.4223	23.0368	22.3906	22.7936	23.0896	22.7453	22.691	22.2386	23.0816	22.8036	23.5763	22.6893	23.1176	22.5328	22.8576	21.8251	22.9179	23.4701	23.1941	22.8476	22.3347	0.738901	0.0606834	0.709432	0.00207334
P09211	Glutathione S-transferase P	GSTP1	23.356	210	22.491	22.7957	21.8924	22.6543	22.4037	22.5541	22.5582	22.5582	22.3183	21.559	21.5641	22.2666	22.2666	21.4097	22.0058	23.0736	21.5935	22.2839	21.5019	21.7996	22.1436	21.7553	22.0299	21.8752	22.0637	21.9907	21.2148	22.1992	22.0806	21.7261	22.4115	21.9602	21.629	22.2011	20.8612	22.0637	21.6359	21.6359	22.446	21.3723	1.32131	0.0607079	1.24205	0.0311793
Q9NR50	Translation initiation factor eIF-2B subunit gamma	EIF2B3	50.24	452	17.6487	17.2312	17.3487	17.7159	17.3604	17.3507	17.23	17.067	16.9811	17.6239	17.0731	17.1908	17.4019	16.9367	16.8651	17.1556	17.2106	17.2251	17.1918	17.4044	16.7999	17.2365	17.3262	16.9385	17.0737	16.9963	16.8585	16.9818	17.0751	17.2676	16.9289	17.0911	17.1942	16.836	17.1623	17.0809	16.93	17.2585	16.9995	16.963	1.14096	0.0607458	1.15726	0.00148738
Q92608	Dedicator of cytokinesis protein 2	DOCK2	211.95	1830	18.2195	18.3225	19.0581	18.3046	18.9187	18.337	18.3016	18.4254	18.579	18.4621	18.6011	18.53	18.7686	19.2859	19.1349	18.4238	18.7822	18.4713	18.4479	19.3289	19.0172	18.6193	18.9743	18.4685	18.511	19.6027	18.4237	19.0498	18.6349	18.5828	18.7569	18.6104	19.0655	18.6894	18.2588	18.722	19.2607	18.6081	18.4298	18.6452	0.820946	0.0608896	0.925692	0.297604
P45974	Ubiquitin carboxyl-terminal hydrolase 5	USP5	95.785	858	19.8984	20.4464	20.1626	20.0528	20.1401	19.9004	20.0672	20.0572	20.3863	20.1228	20.1931	20.2432	20.0947	20.2631	20.8179	20.1981	20.167	20.2894	20.2843	20.3807	20.3861	20.2432	20.0413	20.3616	20.2522	20.5528	19.9465	20.2435	20.4265	20.4321	20.2551	20.3211	20.5311	20.3264	19.8719	20.0402	20.2738	20.4713	20.2254	20.1112	0.889019	0.0610024	0.961009	0.360013
Q7Z5R6	Amyloid beta A4 precursor protein-binding family B member 1-interacting protein	APBB1IP	73.182	666	15.1362	15.4791	15.9053	15.3843	15.1426	15.4105	15.5592	15.7115	15.2215	15.4937	15.6555	15.6095	15.5815	16.5088	15.8746	15.2167	16.2485	15.965	15.2623	15.5373	15.8831	16.2135	15.8086	15.8395	15.3605	15.2858	15.8344	16.3337	15.7264	15.7272	15.6768	15.588	15.7744	15.601	16.1508	15.1612	15.3196	15.4885	15.3904	15.7126	0.811373	0.0611296	0.933915	0.362354
P01008	Antithrombin-III	SERPINC1	52.602	464	19.2739	19.1307	20.1399	19.7614	19.8061	19.5735	19.4378	19.5241	20.1949	20.7993	20.2262	20.0557	20.1612	21.1131	20.5358	19.5212	19.9827	19.7576	20.5263	20.0005	20.5292	20.1379	20.1034	20.9732	20.7417	20.3132	19.761	20.8405	21.1128	20.8162	20.4615	20.6126	20.5228	20.5292	20.6432	20.5445	20.3199	21.0669	20.5445	20.0344	0.745437	0.0613466	0.680967	0.000281529
P05166	Propionyl-CoA carboxylase beta chain, mitochondrial	PCCB	58.215	539	17.398	17.3623	17.6317	17.5788	17.3845	17.4607	17.5769	17.5275	17.429	18.341	18.3923	17.61	17.8368	17.6901	17.6669	17.7449	17.6881	17.505	18.4313	17.8212	17.7067	17.7431	17.6683	17.9521	18.1335	17.8677	18.429	17.671	17.6611	18.0069	17.9474	18.1286	17.8731	18.0223	17.8721	18.3132	17.8354	18.0908	17.8187	18.371	0.829533	0.0613932	0.839881	0.00761321
Q96A35	39S ribosomal protein L24, mitochondrial	MRPL24	24.915	216	16.4244	16.0884	15.7597	15.8729	15.512	16.0186	15.7017	15.6047	15.218	14.9934	14.406	15.5239	15.7121	14.728	15.1823	16.3282	15.4754	15.2674	14.673	15.464	14.7542	15.2118	15.8079	14.8932	14.9245	14.8844	15.5556	15.5632	15.4312	15.3136	14.8801	15.0745	15.2743	14.725	15.9494	15.281	14.9575	14.8122	15.1258	15.061	1.35976	0.061454	1.25151	0.0290049
Q5T013	Putative hydroxypyruvate isomerase	HYI	30.405	277	16.3788	16.2819	16.4862	16.9331	16.8354	16.379	16.3653	16.5475	17.1925	17.1888	17.6887	16.6735	16.8607	16.9295	16.6393	16.4683	16.7104	16.9169	17.7982	17.9547	17.0219	18.0682	16.4115	16.8961	17.4392	17.2778	16.6843	17.358	17.4859	17.0023	17.0132	17.4066	16.8514	17.1007	16.6839	17.1012	16.8006	17.5903	16.8924	16.6571	0.755152	0.0615324	0.855181	0.115084
P17900	Ganglioside GM2 activator	GM2A	20.838	193	16.2972	16.2441	16.2949	16.7993	16.3308	17.0912	15.9737	16.8799	16.0419	15.9304	15.9887	15.8425	16.3349	15.8296	15.8801	16.8478	15.9437	16.2586	15.7624	15.9097	16.6387	16.539	16.1559	15.9389	15.8882	16.2128	16.6445	16.0726	16.1817	15.9676	16.4212	15.9675	16.1358	16.7211	15.5037	16.1789	16.1815	16.0099	16.3239	16.8982	1.25574	0.061637	0.996533	0.965781
Q9NT22	EMILIN-3	EMILIN3	82.646	766	14.5309	14.4612	14.76	15.1187	15.1298	14.5711	14.7021	14.2288	14.3653	14.6685	17.614	15.1608	15.0386	15.2277	14.9592	14.3301	14.6646	14.7744	16.5627	14.7867	13.9419	14.7457	15.0811	15.1783	15.2025	14.9942	16.0792	14.6546	14.6985	15.2343	14.3647	14.1815	14.4268	14.5979	14.9014	14.7434	14.7944	15.3205	14.5101	15.6309	0.633653	0.0616829	1.08573	0.575057
Q9NXU5	ADP-ribosylation factor-like protein 15	ARL15	22.876	204	14.5229	14.5292	14.6287	14.8689	14.4218	15.4128	14.5203	14.6435	14.5821	14.9008	15.1412	14.6109	14.7381	15.0781	14.933	15.1423	14.7429	14.7978	15.1051	14.9459	15.0966	14.8047	14.3384	14.8414	14.9825	14.7834	15.0446	15.0934	15.0716	15.3546	14.9733	15.142	15.1231	14.8512	14.6195	15.2978	14.7137	14.8739	14.9808	14.9019	0.858288	0.0617771	0.913125	0.105979
Q5TC12	ATP synthase mitochondrial F1 complex assembly factor 1	ATPAF1	36.436	328	16.0885	16.2532	17.2106	16.1434	16.5554	16.452	15.996	16.4513	15.9398	16.1675	15.9858	15.9581	16.0803	16.0258	15.96	16.4114	15.9383	16.2519	15.952	16.152	16.1365	16.1594	16.3441	16.2204	16.0976	16.0597	17.0002	16.5206	16.2445	16.2378	15.9406	16.0692	16.5067	16.2952	16.5542	15.9405	15.9996	16.8266	16.7035	16.3686	1.1927	0.0617991	0.924916	0.243993
Q96EL3	39S ribosomal protein L53, mitochondrial	MRPL53	12.107	112	15.4028	15.6846	14.5184	15.2972	14.7693	15.3066	15.8916	15.4111	14.6611	15.314	14.8714	15.1246	14.9306	14.1852	14.7677	15.2972	14.991	14.8703	15.0473	14.8295	15.0601	14.9332	14.7133	15.1656	14.9436	15.1737	15.3756	14.9302	14.9753	14.56	15.132	14.8014	14.7904	15.0064	16.6205	15.4621	14.5895	15.0473	15.4472	14.3996	1.26067	0.0620868	1.00155	0.987141
Q9BYD6	39S ribosomal protein L1, mitochondrial	MRPL1	36.908	325	15.9622	16.0094	15.7465	15.6481	15.9871	15.848	15.8324	15.8246	15.8383	15.6829	15.5253	15.7118	15.5317	15.4098	15.7799	15.7948	15.919	15.7154	15.4847	16.0299	15.8589	15.5636	15.7899	15.659	15.4847	15.8168	16.3388	15.7494	15.6991	15.3698	15.9597	15.781	15.5757	15.8413	16.7576	15.9425	15.7329	15.3788	15.9855	15.718	1.10783	0.06216	0.975302	0.659691
Q14624	Inter-alpha-trypsin inhibitor heavy chain H4	ITIH4	103.36	930	19.0174	18.7466	19.871	19.0223	18.9038	18.8818	18.9137	18.944	19.0112	19.3084	19.6584	19.0677	19.3879	19.7746	19.1338	18.657	19.3944	19.2405	19.9343	19.4506	20.3542	19.4657	19.4547	20.1641	19.7279	19.5592	19.695	20.0356	19.9864	20.3657	19.542	19.805	19.5955	20.2384	19.0072	19.6104	19.4041	20.4744	19.8353	19.8101	0.807814	0.0622555	0.664079	1.45759e-05
O15335	Chondroadherin	CHAD	40.475	359	15.8281	15.8772	15.9914	15.8823	16.4601	15.94	16.0185	15.912	16.0664	15.9397	18.9463	16.5173	15.8695	16.3069	16.2591	15.8277	16.1884	16.732	19.1537	15.9432	16.0997	17.585	15.9191	16.1884	16.3928	16.1248	18.3908	16.4147	16.1279	16.7301	15.8143	15.9417	16.7268	15.9593	16.8894	16.0628	16.1282	17.071	15.9096	17.1277	0.581216	0.0623458	0.934844	0.709023
O94760	N(G),N(G)-dimethylarginine dimethylaminohydrolase 1	DDAH1	31.121	285	17.3289	17.0823	18.3481	17.4286	17.53	17.6032	17.2284	17.2603	17.6159	19.1764	19.0537	18.0993	18.1171	17.9977	17.524	18.0718	17.692	17.7052	19.3633	18.4434	17.7686	17.7259	18.2968	18.2454	19.1796	17.7837	18.044	18.2104	18.4517	18.406	18.0084	18.853	17.8167	17.6956	18.1773	18.9065	18.0759	17.7596	17.8693	18.5939	0.684666	0.0624352	0.835126	0.148916
Q07954	Prolow-density lipoprotein receptor-related protein 1	LRP1	504.6	4544	19.9675	19.7642	20.4684	19.9178	20.1623	19.9144	20.4597	20.1761	19.9105	20.0505	20.3362	20.2515	20.5112	20.4442	20.1654	20.0353	20.4036	20.0142	20.2805	20.172	20.316	20.439	20.4746	20.4756	20.2382	20.223	20.126	20.2738	20.4597	20.5881	20.2149	20.3452	20.4807	20.239	20.1506	20.3011	20.7721	20.3089	20.1585	20.2223	0.88131	0.0624957	0.88879	0.00875647
Q9UHX1	Poly(U)-binding-splicing factor PUF60	PUF60	59.875	559	19.2467	19.5617	18.8492	19.216	18.8594	19.5168	19.2692	19.3667	19.5566	18.8705	19.0646	19.2018	19.0392	18.5028	18.9895	19.315	18.8702	19.0937	18.7545	19.1563	18.9971	18.9109	18.8328	18.8436	18.7586	19.1594	18.5659	18.8787	18.8836	18.6348	19.0787	19.4146	19.1343	18.9714	18.3863	18.9055	19.1537	18.9184	18.8784	18.4724	1.17489	0.0625605	1.16964	0.0102225
P62333	26S protease regulatory subunit 10B	PSMC6	44.172	389	18.262	18.7317	17.2685	18.0886	17.1921	18.6546	17.8303	17.7403	17.7572	17.5068	17.3855	17.6638	17.5077	17.0085	17.2676	17.8627	17.5545	18.3068	17.1907	17.1789	17.9454	17.5032	17.0923	17.3153	17.4664	17.9749	18.2144	17.4813	17.547	17.3578	18.0899	17.4689	17.0937	17.7754	17.4659	17.5975	17.1789	17.5896	17.9443	18.627	1.32919	0.0626718	1.04354	0.667443
P46779	60S ribosomal protein L28	RPL28	15.747	137	16.8803	17.238	16.3101	16.7856	16.9926	16.7639	17.2662	17.0248	16.468	17.0176	16.9859	16.3423	16.6343	16.489	16.2103	16.8295	16.6888	16.6856	16.5916	16.8584	16.9379	16.8542	16.3068	16.7778	16.6024	17.0887	16.4006	16.5928	16.712	16.5074	17.1321	16.7265	16.3364	17.0922	16.4332	16.765	16.8911	16.2757	16.9261	16.4079	1.18359	0.0627116	1.04595	0.476476
Q9NZ52	ADP-ribosylation factor-binding protein GGA3	GGA3	78.314	723	14.727	14.3657	14.6001	14.6575	15.0536	14.6465	14.708	14.555	14.8047	14.4476	14.8642	14.8246	14.7191	14.8191	14.8498	14.7131	15.0323	14.8265	14.7242	14.5982	14.6793	14.6216	14.7063	14.5053	14.3029	14.6621	14.5445	14.6931	15.0118	14.7938	14.6096	14.9278	14.8933	14.3481	15.0619	14.325	14.9088	14.7403	14.4227	14.3518	0.907187	0.0628007	1.05069	0.27566
O94906	Pre-mRNA-processing factor 6	PRPF6	106.92	941	18.0005	18.1634	17.6668	18.0266	18.0607	18.0511	18.045	17.9544	18.3049	17.6957	17.7639	17.9314	18.0465	17.4768	17.8873	18.1592	17.7803	17.6715	17.716	17.8227	17.6921	17.745	17.7696	17.7406	17.8114	17.785	17.5286	17.5946	17.621	17.6317	17.8773	17.9841	17.8552	17.9889	17.552	18.0639	17.7244	17.9339	17.6715	17.6502	1.12611	0.0629824	1.10971	0.012852
Q96EY5	Multivesicular body subunit 12A	MVB12A	28.783	273	13.7025	13.3549	13.434	13.6103	13.5123	13.4683	13.0077	13.6849	13.3333	13.1386	13.1223	13.3813	13.3887	13.2276	13.0416	13.365	13.0278	13.2454	13.3591	13.4016	13.4013	13.1899	13.767	13.2663	13.176	13.4058	13.7441	13.5737	13.459	13.3333	13.6481	13.1736	13.1223	13.449	12.6481	13.1225	13.5684	13.5167	13.393	13.6011	1.12397	0.0630492	0.97428	0.616403
P50402	Emerin	EMD	28.994	254	12.1623	12.9888	11.3579	10.9002	11.2565	12.0569	12.3215	12.363	12.4443	11.7733	11.3579	11.8458	11.5934	11.5287	11.799	11.6618	11.2305	11.4122	11.5779	11.4485	11.9007	11.4522	11.3162	11.9632	11.9632	12.3184	11.1263	11.526	11.5653	11.6522	12.3434	11.661	11.0589	11.9313	11.1853	12.6569	12.0242	11.0751	12.2018	11.7159	1.33505	0.0630494	1.01547	0.88502
Q9UK45	U6 snRNA-associated Sm-like protein LSm7	LSM7	11.602	103	14.7807	14.9376	14.691	14.3338	14.5168	14.5245	14.3496	14.888	15.1073	14.0954	14.2113	14.3732	14.7404	14.1107	14.2559	14.6859	14.1912	14.3528	14.6223	14.2646	14.4195	14.6598	14.5943	14.5398	14.8269	14.4594	14.1211	15.1483	15.0816	14.3722	14.5288	14.6489	14.5864	14.6213	14.8369	14.6645	14.3204	14.9961	14.7943	13.955	1.18233	0.0630954	0.928436	0.258346
P62304	Small nuclear ribonucleoprotein E	SNRPE	10.803	92	17.1494	17.3081	17.1553	17.0353	16.4692	17.2535	17.2616	17.2929	17.1609	16.7405	16.789	16.6844	16.8956	16.7885	16.6433	17.1982	16.9116	16.8373	16.9426	17.1125	16.7817	16.8373	17.0315	16.9436	16.8713	16.9762	16.8966	16.8691	17.0056	16.9693	16.952	17.1079	16.848	17.0016	17.1413	16.9887	16.9896	16.9286	16.9615	16.8834	1.1506	0.0633038	1.0226	0.58416
P27348	14-3-3 protein theta	YWHAQ	27.764	245	20.3802	20.6022	19.207	20.1559	19.3489	19.3675	19.8116	20.1179	19.0427	19.228	18.8008	19.0807	19.9361	18.7023	18.7563	20.0966	19.1814	19.4315	19.3367	19.3632	18.6305	19.1108	19.0859	19.2046	19.2689	18.4628	18.7504	19.2981	19.4991	19.0089	18.863	19.21	18.8038	18.9241	19.1598	19.387	18.3895	18.8323	19.5095	18.4435	1.37327	0.0633336	1.41936	0.00132302
Q9BXB4	Oxysterol-binding protein-related protein 11	OSBPL11	83.642	747	15.9092	15.8528	15.4991	16.0326	15.5655	15.6595	15.2479	15.6745	15.1636	15.569	15.3787	15.3592	15.5588	15.4001	15.1151	15.8129	15.4544	15.3573	15.3747	15.3072	15.5529	15.5572	15.3537	15.4424	15.5567	15.4468	15.4852	15.8415	15.7943	15.5629	15.44	15.4899	15.4345	15.5236	15.3875	15.366	15.3195	15.6757	15.398	15.4047	1.15311	0.0633736	1.00902	0.840297
Q8NDA8	Maestro heat-like repeat-containing protein family member 1	MROH1	181.25	1641	16.4682	16.5243	17.1929	16.4019	16.451	16.6773	16.3655	16.6004	16.6479	17.1418	16.9671	16.7271	17.1417	17.2824	16.8409	16.5332	16.6745	16.5654	17.0415	17.1653	16.9251	16.8077	16.8814	17.5476	17.4038	17.2308	16.6068	17.1088	16.8469	17.4555	16.9536	17.5169	17.207	16.8233	16.8112	17.5161	17.0888	18.1492	17.2577	16.4858	0.842768	0.0633963	0.778791	0.00231718
P08319	Alcohol dehydrogenase 4	ADH4	40.221	380	16.1912	16.1217	17.0007	16.5649	16.4581	16.3741	16.1995	16.4354	16.539	17.2096	17.0737	16.5342	16.6867	16.9237	16.6699	16.5249	16.567	16.6764	18.1367	17.0418	16.8287	16.81	17.0049	17.4418	17.0186	16.924	16.9877	17.3844	18.298	17.332	16.7452	17.6406	17.3034	17.9323	17.7038	17.2595	16.492	17.2324	18.0643	16.9759	0.771595	0.063515	0.672441	0.000363517
Q09028	Histone-binding protein RBBP4	RBBP4	47.655	425	18.7567	18.6723	18.721	19.0056	18.6962	19.1486	18.6074	18.7269	19.0888	18.0907	18.4246	18.5281	18.7203	18.0308	18.3319	19.1604	18.3197	18.5508	18.0515	18.6116	18.4689	18.6485	18.8278	18.3819	18.1999	18.1558	17.9321	18.5648	18.6419	18.543	18.4548	18.5539	18.5297	18.486	17.7524	18.3345	18.2709	18.2586	18.3524	18.3869	1.21291	0.0635552	1.16874	0.021759
O60235	Transmembrane protease serine 11D	TMPRSS11D	46.263	418	18.1456	17.136	17.4546	17.1689	17.4982	18.2385	17.5689	17.3103	17.4155	17.1938	17.4434	17.0384	17.2874	17.267	17.4817	17.2427	17.2287	17.1642	17.424	16.8508	17.6188	17.7833	17.4876	17.5432	17.4876	17.424	17.2942	17.3431	17.8039	17.5266	17.4974	17.3604	17.399	17.49	17.0494	17.3372	17.3382	17.5751	17.6836	17.3895	1.20596	0.0635583	0.937124	0.267077
Q15785	Mitochondrial import receptor subunit TOM34	TOMM34	34.559	309	17.829	18.1369	17.4362	18.2046	17.4513	17.9738	17.3068	17.7818	18.0456	17.8602	17.5291	17.5955	17.7107	17.4561	17.7028	17.7283	17.5745	17.5889	17.3563	17.6968	17.7692	17.4395	17.4438	17.5012	17.4554	17.7582	17.4206	17.6514	17.6377	17.8925	18.1151	17.6816	17.5795	17.6493	17.1832	17.6938	17.7116	17.5796	17.8803	17.4645	1.15566	0.0636482	1.0518	0.325346
P12111	Collagen alpha-3(VI) chain	COL6A3	343.67	3177	22.2811	22.5514	22.6344	22.1198	22.2876	22.1717	22.4614	22.5031	22.6835	23.1755	23.6809	22.8002	23.0808	22.0582	22.4378	22.6704	22.8134	22.3468	23.9307	23.1755	22.6344	22.6826	22.9069	22.6704	23.0907	22.8682	22.541	22.4614	23.0734	23.4455	22.8447	22.9802	23.6809	22.5514	22.2125	22.7742	23.1867	23.3351	22.4837	22.3509	0.751312	0.064072	0.904044	0.308149
Q9Y6D6	Brefeldin A-inhibited guanine nucleotide-exchange protein 1	ARFGEF1	208.76	1849	18.8733	19.0497	18.9871	18.7177	19.4656	19.1801	19.0056	18.9497	19.3276	19.1405	18.7332	19.0054	18.9796	18.9734	19.172	18.7137	18.6844	19.0847	18.8185	18.8141	18.6006	18.8062	19.1882	18.6588	18.7565	18.7794	18.7193	18.7003	18.7689	18.5239	18.7711	18.7535	18.7083	18.6177	18.4341	18.8171	18.7843	18.7565	18.6722	18.4862	1.12644	0.0641259	1.20466	4.40642e-05
P22897	Macrophage mannose receptor 1	MRC1	166.01	1456	18.5369	18.5805	19.4754	18.8577	19.1098	18.6152	18.9502	18.7233	19.1112	18.6324	19.5965	19.1437	19.1099	19.2603	18.7753	18.9031	19.6797	18.7263	19.0434	19.0753	19.6318	20.1798	19.652	19.6751	19.177	19.1945	19.7869	19.2805	19.2622	19.6344	19.512	19.2674	19.9073	19.548	19.4585	19.2197	20.3756	19.0087	19.2784	19.8045	0.828125	0.064187	0.684251	1.0781e-05
Q5BJD5	Transmembrane protein 41B	TMEM41B	32.513	291	15.1305	14.9921	14.4121	14.5496	14.6551	15.031	14.5292	14.854	14.821	14.0856	14.0595	14.6024	14.3882	14.2611	14.2806	15.0078	14.02	14.8183	13.7504	14.7055	14.297	14.5055	14.3511	14.3419	14.0094	14.3182	13.9057	14.4436	14.3707	13.8667	14.2268	14.1385	13.8048	14.964	13.8601	14.184	14.2145	13.6301	14.3976	13.6821	1.24542	0.0644767	1.2942	0.0020285
Q9Y2H1	Serine/threonine-protein kinase 38-like	STK38L	54.002	464	13.8214	13.8969	13.6141	13.9067	13.881	13.353	14.1809	14.3045	14.0891	13.5521	13.479	13.6759	13.6572	13.5358	13.2288	13.68	13.7177	13.7096	13.9633	13.7652	13.5568	13.6541	13.7782	13.4538	13.9912	14.0406	13.5764	13.5731	13.5011	13.4646	13.5329	13.4977	13.8697	13.5684	14.9069	13.6748	13.7621	14.1696	13.3933	13.5316	1.1637	0.0645847	1.01803	0.79462
P02458	Collagen alpha-1(II) chain	COL2A1	141.78	1487	16.1849	15.7001	16.1792	16.3854	16.8372	16.0906	15.5448	15.1012	15.5295	15.1855	20.2922	16.9876	16.1157	16.2825	16.0351	16.2519	16.0449	16.995	19.9588	15.0847	15.7433	16.1157	16.2332	15.746	16.0531	15.8789	18.3744	15.8321	14.85	15.8196	15.9863	15.572	16.0958	15.8656	16.0216	15.9111	16.0052	15.6447	15.7964	15.9487	0.456599	0.0646298	1.37998	0.178788
Q8NC51	Plasminogen activator inhibitor 1 RNA-binding protein	SERBP1	44.965	408	19.5189	19.3798	18.3741	19.2506	19.2739	19.4523	18.974	18.8692	19.3665	18.451	18.3546	19.3596	18.2811	18.0766	19.0792	19.1053	18.4013	19.3583	18.3404	18.617	18.9344	19.0961	18.5752	18.6875	18.1012	18.5455	18.6569	18.6721	18.8457	18.0136	19.0527	18.6507	18.1283	18.7831	18.301	18.6132	18.378	18.1244	19.282	19.46	1.31376	0.0647241	1.18847	0.0822678
Q99973	Telomerase protein component 1	TEP1	290.49	2627	17.3938	17.2274	17.9852	17.4306	17.7314	17.2648	17.5696	17.5169	17.4167	17.3284	17.6306	17.447	17.7805	17.7537	17.7627	17.3506	17.755	17.787	17.742	17.5771	17.5831	17.5462	17.6349	17.6997	17.6831	17.6689	17.7316	17.585	17.5182	17.909	17.667	17.8385	17.8993	17.5	17.7123	17.5446	17.9071	17.828	17.5145	18.0472	0.887535	0.0647421	0.914874	0.0349923
O15439	Multidrug resistance-associated protein 4	ABCC4	149.52	1325	14.8419	14.5667	15.1477	14.4614	14.9729	14.8619	14.9679	14.7379	15.1124	15.0037	14.9924	15.506	14.9511	15.1119	15.4635	15.0183	15.176	14.68	14.9279	14.9417	14.9758	14.7243	15.3068	14.8371	14.9831	14.9876	14.9195	14.9123	14.9079	15.5288	14.7414	14.9452	15.0259	14.6972	14.6987	15.2501	15.3626	14.999	14.5507	15.1083	0.864883	0.0647771	0.999334	0.99039
Q9Y2J8	Protein-arginine deiminase type-2	PADI2	75.563	665	18.534	18.3861	19.0247	19.0317	18.7868	18.7167	18.5011	18.5452	18.9129	19.1596	19.175	18.8118	18.7033	19.5709	18.9392	18.7352	21.4764	18.8791	19.4027	19.2654	18.9909	18.8774	19.2239	19.0734	19.414	18.7994	20.5042	19.1839	18.8083	19.3535	18.6333	19.1011	18.8827	18.8145	21.6502	19.1243	18.8446	19.193	18.7644	20.6469	0.689674	0.0649482	0.831452	0.243486
P25685	DnaJ homolog subfamily B member 1	DNAJB1	38.044	340	18.3754	18.8627	17.8186	18.8524	18.4595	18.5446	18.3975	18.3564	18.5991	17.7732	17.7164	18.3294	18.1401	17.8099	18.1143	18.7118	18.0227	18.41	17.8199	17.9861	18.3623	18.5789	17.9335	18.0483	17.953	17.8199	17.9906	18.244	18.1722	17.6189	18.3258	17.9849	17.8071	18.1753	17.7116	17.8096	17.8608	17.9989	18.34	18.3891	1.22935	0.0650972	1.14771	0.0532685
P16083	Ribosyldihydronicotinamide dehydrogenase [quinone]	NQO2	25.918	231	14.8605	15.1889	15.3685	14.9782	15.4354	15.1976	15.565	16.1097	15.0596	15.8264	16.0064	15.361	15.2225	16.5065	15.9021	15.9698	15.7655	15.1034	16.2283	15.3117	15.8609	15.7038	15.4463	15.2097	15.9948	15.1762	16.0576	15.9401	15.033	15.5778	15.8154	15.6269	15.8706	15.586	15.8275	16.0179	15.3113	15.2402	15.6165	15.5894	0.769101	0.0650995	0.948196	0.539835
Q12805	EGF-containing fibulin-like extracellular matrix protein 1	EFEMP1	54.64	493	18.3094	18.1299	18.5845	18.5681	18.7647	18.1862	18.8653	18.5001	18.2897	18.4709	18.4959	18.5152	19.1419	19.0615	18.3762	18.6855	18.9571	18.4625	18.7322	18.5001	18.2993	18.5955	18.7527	18.6337	18.8574	18.2938	18.6215	18.3388	18.4061	19.1357	18.2877	18.3885	18.4519	18.0466	19.9688	18.5204	18.9925	18.7146	18.0808	18.7919	0.855048	0.0651796	0.98006	0.800141
Q15181	Inorganic pyrophosphatase	PPA1	32.66	289	19.786	20.1056	19.885	19.8016	19.5762	20.0367	19.4951	20.1878	19.6678	20.0335	19.8275	19.7177	19.556	19.5697	19.7614	19.922	19.4631	19.8154	19.4972	19.7079	19.8882	19.7399	19.8075	19.5393	19.6302	19.6666	19.3891	19.8619	20.0392	19.7038	20.021	19.5911	19.3501	19.9027	19.0272	19.9689	19.6561	19.2857	19.764	19.2609	1.12798	0.0651922	1.08372	0.144798
Q9HA77	Probable cysteine--tRNA ligase, mitochondrial	CARS2	62.223	564	14.6564	14.9804	14.3501	14.8474	14.6993	14.8139	14.6365	14.3775	14.6736	14.241	14.2704	14.3638	14.1779	14.1052	14.5179	14.6822	14.5542	14.7009	14.4373	14.5324	14.4171	14.3556	14.3529	14.3053	14.1908	14.3825	14.3817	14.7068	14.4418	14.0752	14.5815	14.3501	14.42	14.2622	14.5954	14.404	14.3383	14.0637	14.5057	14.3168	1.14345	0.0653573	1.11617	0.0170093
Q9BXJ9	N-alpha-acetyltransferase 15, NatA auxiliary subunit	NAA15	101.27	866	18.6041	18.74	18.1637	18.2476	18.268	18.4415	18.5527	18.4143	18.1886	18.0501	18.0442	18.4646	17.9616	17.9921	18.3691	18.2963	18.1621	18.3936	17.9985	18.2032	18.3863	18.2234	18.1441	18.1445	18.0353	18.299	18.0735	18.3343	18.2349	17.8812	18.3331	18.0693	18.0366	18.3379	17.8435	17.9778	18.0597	18.3465	18.5575	17.9447	1.13174	0.0654847	1.0827	0.0838464
O75131	Copine-3	CPNE3	60.13	537	19.7815	19.7993	19.329	19.2711	19.1482	19.5858	19.8117	19.4537	19.1019	19.2146	19.4865	19.1323	19.347	19.2457	19.103	19.2736	19.1004	19.5103	19.2467	19.0688	19.1049	19.5623	19.0704	19.7987	19.2991	18.9717	19.1979	19.6384	19.53	18.9857	19.1764	18.9957	18.9957	19.8113	18.7933	19.2893	18.9907	18.9596	20.0577	19.3777	1.14731	0.0655304	1.04988	0.463205
P78539	Sushi repeat-containing protein SRPX	SRPX	51.571	464	13.192	12.6206	13.3443	13.3775	13.0076	12.8797	13.7093	13.541	14.1295	13.6204	16.105	14.0698	14.0674	13.7616	13.4708	12.7145	13.3317	13.3912	14.9989	14.0425	14.1435	14.0485	13.45	13.847	14.3116	13.3912	13.0366	13.6795	13.8704	13.1062	13.7111	13.2625	13.6019	13.6019	13.2208	15.4548	13.9166	13.3389	13.4626	13.6628	0.635891	0.0655895	0.974572	0.863712
Q96E52	Metalloendopeptidase OMA1, mitochondrial	OMA1	60.12	524	15.1259	14.86	15.4248	14.9418	15.0148	14.856	15.2679	15.8812	14.762	15.2871	15.0263	14.7537	15.0143	14.6528	15.1645	15.0402	14.9298	14.992	14.6643	14.8338	14.6925	14.8684	15.6996	15.6213	14.9581	14.5702	15.3866	14.8824	14.7244	14.845	15.068	14.8649	15.8714	14.788	15.4994	15.2669	14.9051	14.4678	15.7605	15.0661	1.1769	0.0658368	0.955509	0.565285
P68871	Hemoglobin subunit beta	HBB	15.998	147	23.2356	22.9537	23.3098	22.8206	22.9176	23.6213	23.3036	24.0143	22.967	23.8155	24.7131	23.6399	24.7131	23.3098	23.4004	22.8611	23.8176	22.8206	24.6176	24.2411	23.8514	23.4004	23.2356	24.6176	24.6176	24.6176	23.3036	23.8155	24.0143	25.1665	24.0618	24.3016	25.2807	24.7131	23.2356	24.2356	23.6213	24.6176	24.2356	24.0143	0.698574	0.0658733	0.662869	0.00447614
O14896	Interferon regulatory factor 6	IRF6	53.129	467	17.5356	18.3677	17.1476	18.6586	17.7124	18.2628	18.0685	18.3731	17.908	17.4415	17.3618	17.7835	17.1069	16.9043	18.4737	17.7482	17.3412	17.9364	17.2656	17.4391	17.7466	17.4626	17.1944	17.4388	17.1617	17.2782	17.1719	17.4608	17.6873	17.3547	17.8625	17.3112	17.094	17.7157	17.0092	17.1034	17.5224	17.4707	17.5931	17.1519	1.33009	0.0660416	1.27656	0.00781987
Q9NTN3	UDP-glucuronic acid/UDP-N-acetylgalactosamine transporter	SLC35D1	39.24	355	14.6151	14.4578	13.3049	14.9145	13.8801	13.7986	13.8956	14.4766	13.0442	13.5563	13.7016	13.4053	13.9628	13.0471	12.3476	13.8638	13.47	14.1133	13.7777	13.3197	13.5487	13.8956	13.2806	13.5713	13.232	14.1081	13.0442	13.9548	13.5779	14.3108	13.7826	13.5487	14.2871	13.83	13.2212	13.0071	13.2677	14.5079	13.651	12.8702	1.40785	0.0661123	1.08881	0.474723
P02462	Collagen alpha-1(IV) chain	COL4A1	160.61	1669	18.2319	17.9676	17.9836	18.092	18.1667	17.784	17.8167	18.0381	18.1312	18.5554	18.7364	18.4216	18.3145	17.9413	18.0471	18.2227	18.5949	17.9141	18.6296	18.2017	17.6445	18.1802	18.2147	18.1839	18.3477	17.639	18.4538	18.0481	18.1577	18.1792	17.5422	17.6921	17.8215	17.7268	18.0174	17.9724	17.6454	18.1527	17.824	17.5767	0.85519	0.0661496	1.17981	0.00988369
P08579	U2 small nuclear ribonucleoprotein B	SNRPB2	25.486	225	16.618	16.2434	15.7292	15.5104	15.396	15.815	16.0647	16.4948	15.2966	15.6931	15.363	15.6538	15.9512	14.9257	15.1997	15.9644	16.0013	15.503	15.0783	15.5519	15.3185	15.5681	15.6772	15.0849	16.1559	15.2178	15.5337	15.389	15.5206	15.4218	15.4554	15.441	15.6817	15.2414	15.3185	15.3608	15.1569	14.7345	15.0576	14.7733	1.28957	0.0663545	1.27212	0.00769127
P51608	Methyl-CpG-binding protein 2	MECP2	52.44	486	17.8185	18.0586	18.2182	17.7277	18.0494	17.8792	18.2511	18.1335	18.2886	18.773	18.673	17.8884	18.3962	18.992	18.186	18.2392	18.1027	18.2262	18.5656	18.6665	18.2967	17.9758	18.0208	18.5438	18.6758	18.5281	18.2456	18.6411	18.4931	18.2403	18.3979	18.541	18.0946	18.3143	18.5583	18.4893	17.9453	18.252	18.6068	17.8874	0.827144	0.0665199	0.945587	0.392982
P31151	Protein S100-A7	S100A7	11.471	101	20.2761	17.4697	17.1236	19.6655	19.5958	19.4307	17.3026	17.5244	19.6755	17.1633	17.1337	17.2255	17.1418	19.0803	17.7158	17.8171	18.013	17.9137	17.3567	16.9419	16.8444	17.4954	16.9313	17.0569	17.1669	17.3574	18.1791	17.0057	16.9739	17.0523	16.8927	16.8421	17.386	17.2513	17.5156	17.021	17.2997	17.4838	17.162	17.9165	1.85158	0.0666511	1.78589	0.00232799
P04114	Apolipoprotein B-100	APOB	515.6	4563	21.5598	21.5235	22.4417	21.637	22.1119	21.6712	21.8182	21.9657	21.8755	22.247	22.5251	22.0311	22.2537	22.0311	22.2198	22.1728	22.0824	21.5562	22.1433	22.2693	22.6743	22.4417	22.1878	22.9451	22.7085	22.5232	21.774	22.8535	22.8039	23.0548	23.0827	22.6743	22.8348	22.9068	21.7633	22.3989	22.8796	22.4851	22.6127	21.8899	0.844802	0.0667502	0.674585	1.01556e-05
Q9GZS1	DNA-directed RNA polymerase I subunit RPA49	POLR1E	47.26	419	15.7686	15.5239	14.9761	15.5803	15.6009	15.7261	15.4869	15.4806	15.1807	15.519	14.6547	15.3848	15.2107	15.8473	15.4061	15.3702	14.9527	15.3584	15.1716	15.0161	14.9431	14.954	15.2445	14.874	14.9605	15.1435	15.5826	14.9588	14.8118	15.451	14.9936	15.0372	14.9384	14.8041	16.1681	15.0607	15.258	14.9505	15.0841	15.5695	1.18678	0.0669018	1.16586	0.034131
Q13642	Four and a half LIM domains protein 1	FHL1	36.263	323	17.8956	17.8606	18.4729	17.3726	17.1101	17.4486	18.3719	18.1139	18.2739	18.4719	18.7754	18.1495	18.5488	18.7183	18.2192	17.963	19.1721	17.4785	18.1208	18.4635	18.5824	18.6706	19.1634	19.2568	20.1961	17.556	20.8471	19.0484	18.5584	18.5448	18.3313	18.235	18.4806	18.8751	22.0103	18.8892	17.6023	17.8345	19.0408	20.4167	0.746526	0.0671884	0.552129	0.00337553
Q14241	Transcription elongation factor B polypeptide 3	TCEB3	89.908	798	11.9072	11.7787	10.7951	12.1132	11.7473	12.3354	11.5074	11.5074	11.4445	11.4445	10.6638	11.3267	12.2179	10.8706	10.7951	12.3057	11.197	11.2207	10.504	10.8572	10.5999	10.9416	10.9416	10.3802	10.4568	10.679	10.7875	10.7875	10.5918	10.4221	10.9916	11.0404	10.9416	11.0751	11.7397	10.763	10.3802	10.3802	10.6457	10.9155	1.37765	0.0672274	1.57342	7.01654e-05
Q9NYM9	BET1-like protein	BET1L	12.388	111	17.1651	17.3502	16.4337	16.2527	16.4193	16.3041	16.8359	16.9461	16.2631	16.6832	16.5336	16.2482	16.4828	15.9058	15.9109	15.9644	16.3171	16.6842	16.815	16.6107	16.1551	16.3986	16.0047	16.3912	16.6903	16.8993	16.2034	16.7671	16.3851	16.7284	16.4685	16.2188	16.1533	16.6595	16.6274	16.3747	16.25	17.3906	16.423	16.2128	1.24666	0.0672714	1.02542	0.751462
O14727	Apoptotic protease-activating factor 1	APAF1	141.84	1248	16.4998	16.3646	16.7663	16.3962	16.7524	16.4644	16.4289	16.3818	16.4696	16.5293	16.5965	16.707	16.5536	17.1282	16.9105	16.4205	16.6371	16.7055	16.3716	16.648	16.5965	16.5974	16.7237	16.5786	16.5016	16.8133	16.4011	16.6895	16.3805	16.8307	16.6105	16.6215	16.7753	16.514	16.6442	16.6472	16.9692	16.648	16.3725	16.7266	0.893457	0.0674105	0.968952	0.424735
P59768	Guanine nucleotide-binding protein G(I)/G(S)/G(O) subunit gamma-2	GNG2	7.8501	71	14.0744	13.9136	14.6393	13.8265	13.8491	14.0571	14.3318	14.3254	13.672	14.1523	14.1942	14.3667	14.6174	16.5932	14.2879	14.0846	14.4016	14.1869	14.4427	14.4937	14.1873	14.808	14.7064	14.7735	14.7053	14.6726	14.8215	15.1952	15.1541	14.6985	13.9607	14.3038	14.6557	14.3692	14.7768	14.645	15.2473	14.7974	14.7974	14.4675	0.715607	0.0675594	0.778284	0.0215552
Q5T0W9	Protein FAM83B	FAM83B	114.8	1011	16.9749	16.772	16.0417	17.0157	15.9265	16.4756	15.808	15.853	17.4003	15.5219	15.1292	15.9142	16.4061	15.1683	15.4965	16.4527	15.7215	16.8483	15.5066	15.9022	15.5888	16.0706	15.511	15.5624	15.3093	15.4678	15.853	15.7809	15.9321	15.7248	15.6571	15.596	15.8402	15.907	15.596	15.2573	15.2548	15.8965	15.9126	15.7755	1.43834	0.0675688	1.35857	0.00654306
Q53H82	Beta-lactamase-like protein 2	LACTB2	32.805	288	17.7003	17.8531	17.464	17.0267	17.3896	17.7584	17.6333	17.2131	18.0299	17.5901	17.4209	17.5308	17.3804	17.3194	17.3884	17.1	17.2273	17.2498	17.5433	17.4587	17.2751	17.1833	17.3783	17.507	17.5822	17.779	17.2872	17.3959	17.4447	17.402	17.3416	17.3909	17.4155	17.3847	17.4812	17.5537	17.415	17.3193	17.4819	17.1096	1.15186	0.0677568	1.04065	0.380758
Q93084	Sarcoplasmic/endoplasmic reticulum calcium ATPase 3	ATP2A3	109.25	999	18.0394	17.9106	18.4292	18.1418	18.2872	17.9804	17.7841	17.7942	18.2165	19.7351	19.96	18.4873	18.432	18.6064	18.4913	18.038	18.5939	18.3161	19.7469	18.8059	18.5667	18.1723	18.4214	18.3476	19.0524	18.7443	19.4658	18.5187	18.3781	18.198	18.4389	18.9474	18.3788	18.4372	18.944	19.3354	18.4472	18.3372	18.0127	19.2974	0.699339	0.0677905	0.912413	0.440633
Q6V1X1	Dipeptidyl peptidase 8	DPP8	103.36	898	15.9034	16.3457	16.4931	16.2505	16.5732	16.8477	16.4027	16.3261	16.3768	16.0031	16.6296	16.8811	16.2077	17.084	17.5069	16.5933	16.8909	16.2758	16.8574	15.9055	16.7012	16.3554	16.4428	16.2653	16.5907	16.5546	17.9748	16.0799	16.0433	16.2053	16.729	16.3532	16.9804	16.4765	16.2041	16.3829	16.5857	16.4498	16.0208	18.4347	0.794987	0.067801	0.950136	0.65432
P50990	T-complex protein 1 subunit theta	CCT8	59.62	548	20.3202	20.1598	20.0284	20.4472	20.2511	20.0443	19.9	20.1907	20.2431	19.6596	19.8283	20.1254	19.782	19.7304	20.1102	20.1764	19.904	20.0725	19.7726	20.015	20.1153	19.8105	20.0972	19.8391	19.7969	19.7758	19.6317	19.7599	19.7536	19.6942	19.9484	19.6963	19.8824	19.9006	19.6705	19.7687	19.9728	19.8152	19.7586	20.0186	1.12721	0.0679127	1.1509	0.000950706
A5YKK6	CCR4-NOT transcription complex subunit 1	CNOT1	266.94	2376	18.7459	18.8624	18.8439	18.6288	18.6758	18.829	18.9449	19.0253	19.032	18.7052	18.8868	18.8384	18.8343	19.089	19.1773	18.8221	18.7581	19.0091	19.0444	19.0594	19.1574	18.817	18.76	18.8433	18.8358	19.0624	18.6542	18.8578	18.8269	18.7843	19.044	18.9121	18.9106	18.9285	18.499	18.8801	18.9993	18.9714	18.7855	18.735	0.918532	0.0679484	1.01914	0.567011
P55769	NHP2-like protein 1	NHP2L1	14.173	128	17.721	17.5772	17.2445	17.2186	17.1947	17.6558	17.3518	17.2014	17.1396	16.7097	16.6742	16.9032	17.6892	16.7134	16.9632	17.6974	16.8333	17.1365	16.5327	16.801	17.0647	17.1256	16.9192	17.1286	16.9305	16.8057	17.1174	16.7979	17.5191	16.5296	16.8336	16.6878	16.7983	17.089	16.591	17.1048	16.5298	16.6339	17.5622	17.2737	1.23715	0.0681206	1.14535	0.0769419
O76003	Glutaredoxin-3	GLRX3	37.432	335	19.59	19.4889	18.9292	19.6316	18.8972	19.6495	18.771	19.0212	19.6451	18.7894	18.7989	18.9647	18.9834	19.0247	18.5491	19.243	19.0007	19.1972	19.0312	18.9572	19.0956	18.9578	18.7715	18.8562	18.6928	18.9028	18.7416	18.907	19.1223	19.2444	19.225	19.1207	19.0172	19.1637	18.6332	18.6938	19.0293	19.0797	19.0028	18.7525	1.20273	0.068141	1.11548	0.0704966
A0A075B7B8		IGHV3OR16-12	12.874	117	17.492	17.1923	18.2874	17.5223	17.9658	17.6608	17.7166	17.1582	18.1451	17.6938	19.5673	17.6189	17.8613	18.6183	17.8573	17.3006	18.0992	17.3601	18.708	20.3958	18.4509	18.7249	18.1984	18.5745	18.4074	19.0328	17.7256	18.0153	17.7326	17.8587	18.4509	17.9848	18.13	18.6395	17.9931	18.0061	18.8642	18.9092	18.2105	17.6645	0.634965	0.0681885	0.830675	0.196043
Q8WUW1	Protein BRICK1	BRK1	8.7448	75	17.5796	17.3447	17.5599	17.3678	17.4314	17.2804	17.5513	17.6275	17.3283	17.3263	17.1641	17.3823	17.2389	17.2377	17.6767	17.3227	17.0599	17.5086	17.2372	17.2246	17.3022	17.3464	17.6849	17.4248	17.2124	17.1397	17.1537	17.4319	17.6747	17.2159	17.3659	17.0974	17.2682	17.2373	17.0513	17.3306	17.5233	17.4271	17.6472	17.0428	1.09767	0.0682679	1.03069	0.453086
Q7Z4I7	LIM and senescent cell antigen-like-containing domain protein 2	LIMS2	38.916	341	14.1632	13.5294	13.8573	13.7278	14.0153	13.7222	14.109	13.786	13.3931	14.4359	14.3788	14.6139	14.4865	15.7868	14.0586	14.0917	13.8602	13.8014	13.8263	13.9745	13.8335	14.5292	14.0265	14.9979	15.9472	13.6916	15.1567	13.7134	14.0834	14.2187	13.5651	13.4518	13.651	14.4324	14.1178	14.5915	13.9436	13.5836	14.1366	14.7183	0.750569	0.06828	0.908397	0.450036
P35236	Tyrosine-protein phosphatase non-receptor type 7	PTPN7	40.529	360	16.347	16.3333	16.9976	16.6443	17.6062	16.8113	16.5008	16.5968	17.059	16.7929	17.0979	16.6668	17.1866	17.3571	17.0305	17.6458	17.0178	16.7661	16.5779	17.5807	17.5875	16.9553	16.6905	16.6992	16.7741	17.3236	16.5711	17.1812	16.9851	17.3379	17.3862	17.1259	17.2504	17.2622	16.4936	16.831	16.6308	16.5353	16.7002	16.8229	0.79897	0.0683683	0.981888	0.820697
P04439	HLA class I histocompatibility antigen, A-3 alpha chain	HLA-A	40.84	365	19.2688	19.2599	19.2389	18.5573	19.3704	19.4274	19.4422	19.2681	18.1327	18.0905	17.9749	18.7074	18.8687	18.6485	18.6421	18.6655	18.6762	19.4507	17.9154	18.2364	18.2184	18.8097	19.2933	18.382	17.982	18.5711	18.4369	18.2991	18.0096	18.4334	17.8513	18.6346	18.6167	17.9963	18.4914	18.3487	18.8711	18.2462	18.1269	18.2277	1.34448	0.0684028	1.31931	0.00736141
Q8TEA7	TBC domain-containing protein kinase-like protein	TBCK	100.68	893	15.2344	15.2344	15.7212	15.5203	15.7561	15.3976	15.3297	15.4874	15.7557	15.3655	15.5945	15.5393	15.635	15.6478	15.6802	15.5024	15.531	15.8198	15.5996	15.6211	15.6911	15.5883	15.6507	15.6613	15.6547	15.4553	15.5664	15.6061	15.5766	15.6526	15.6102	15.7966	15.6703	15.6536	15.436	15.7444	15.9308	15.2308	15.5747	16.0659	0.909502	0.0685477	0.938119	0.0963843
P00325	Alcohol dehydrogenase 1B	ADH1B	39.835	375	18.056	17.9013	19.033	19.4889	19.2087	18.6259	18.2065	18.0516	18.4546	19.3113	20.1425	19.1092	18.8399	18.7722	18.6301	18.4961	18.6432	19.6404	19.9176	19.1945	19.3921	18.8595	19.1975	18.6056	19.7364	18.1493	19.0219	19.3476	20.0812	19.6461	19.1766	19.2176	19.3209	20.29	18.9433	19.4411	18.3133	19.8037	19.415	19.4621	0.704768	0.068666	0.765851	0.0427652
P55036	26S proteasome non-ATPase regulatory subunit 4	PSMD4	40.736	377	19.0361	19.3764	18.7128	19.2041	18.8163	19.2799	19.1456	19.1523	18.7065	18.898	18.7977	18.8039	18.9401	18.8378	18.8444	19.0869	18.8581	19.0384	18.7031	18.7924	19.167	18.9207	18.5489	18.7873	18.6607	18.9644	19.0702	18.8706	18.9744	18.6465	19.1298	18.9986	18.7418	19.0303	18.8946	18.8757	19.1765	18.9477	19.0855	18.9317	1.11925	0.0688752	1.02129	0.612495
P62424	60S ribosomal protein L7a	RPL7A	29.995	266	19.5079	19.3882	19.2712	19.4848	19.6296	19.2936	19.5966	19.3217	19.3778	19.4643	18.9854	19.702	18.894	18.9665	19.7322	19.4235	18.9895	19.3153	18.7168	19.3498	19.3232	19.1807	19.5815	19.1787	18.8971	19.4746	18.7585	19.0345	19.0358	18.8869	19.2485	18.9758	18.9945	19.1807	18.6621	19.098	19.2812	18.6605	19.3885	18.8052	1.16965	0.0690196	1.17953	0.00818113
P01871	Ig mu chain C region	IGHM	51.923	474	18.9694	18.361	19.4941	19.342	18.8566	19.2619	19.0499	18.5658	18.4117	19.6407	20.0419	18.9606	19.3781	20.0633	19.1703	18.9942	19.4952	18.6396	19.5326	19.6058	20.1435	19.1651	19.3188	20.2405	20.3687	19.2661	19.5888	19.6763	19.7118	20.0993	19.4191	19.3115	19.3046	19.8558	19.7023	20.2069	19.3786	19.874	19.4882	19.2752	0.76162	0.0690683	0.71796	0.0013224
Q96L46	Calpain small subunit 2	CAPNS2	27.66	248	16.7766	16.5498	16.6721	17.0774	16.9987	16.9251	16.5029	16.8678	16.8087	16.0771	16.3624	16.2896	16.2568	16.39	16.6776	16.5919	16.3937	17.0304	16.3299	16.6262	17.041	17.0822	17.0673	17.0268	16.3464	16.3226	16.1438	17.0662	16.9688	16.8465	17.2743	16.4944	16.3988	17.2432	16.5132	16.3226	16.3768	16.4577	17.5467	17.0926	1.17347	0.0691916	0.888006	0.131441
P62140	Serine/threonine-protein phosphatase PP1-beta catalytic subunit	PPP1CB	37.186	327	18.9005	19.2156	18.7441	18.5891	18.4472	18.8876	19.0067	18.8958	18.6069	18.5097	18.2226	18.6077	18.7695	18.6728	18.058	18.9618	18.532	18.8989	18.4193	18.3391	18.1244	18.715	18.7564	18.7057	18.7439	18.1082	18.6897	18.3413	18.4056	18.2373	18.3391	18.1728	18.0842	18.6761	18.5314	18.7161	18.2306	18.4937	18.8114	18.6312	1.17457	0.0694462	1.1396	0.0335712
P01137	Transforming growth factor beta-1	TGFB1	44.325	390	11.463	11.1011	12.2655	11.4633	11.4929	11.5268	11.2567	11.5012	11.7497	11.8188	11.5186	12.1994	11.7544	13.5839	12.4043	11.3865	11.8691	11.5268	11.8691	11.8826	12.1179	11.915	12.5624	11.6771	11.7914	12.4044	11.7677	11.5012	11.3777	12.3289	10.9923	11.8527	11.943	11.0767	11.7803	11.6771	12.1766	12.5635	11.6387	13.0447	0.739412	0.0695094	0.915233	0.445301
P01023	Alpha-2-macroglobulin	A2M	163.29	1474	21.3526	21.1512	22.4677	21.4594	21.6311	21.7601	21.4264	21.4122	21.5987	21.7911	22.0721	21.7972	21.865	22.3846	21.8416	21.2855	21.9689	21.4075	22.3648	22.1927	22.6282	21.9333	22.0721	22.9101	22.9101	22.2918	22.0315	22.5978	22.6705	22.5978	22.3044	22.8454	22.1043	22.7864	21.5126	22.5111	22.2918	22.6991	22.2918	22.109	0.805004	0.0695538	0.640183	4.412e-06
Q08AM6	Protein VAC14 homolog	VAC14	87.972	782	17.7404	17.8679	17.8237	17.6375	17.821	17.5962	17.8578	17.7925	17.917	17.7178	17.6199	17.6199	17.9018	17.4674	17.5781	17.4535	17.6977	17.9518	17.7094	17.5903	17.6532	18.116	17.7445	17.6423	17.6662	17.888	17.7878	17.6662	17.77	17.4951	17.6621	17.7192	17.9085	17.7349	17.4589	17.7491	18.0072	17.7831	17.6073	18.0367	1.08537	0.069613	0.97487	0.467349
O75533	Splicing factor 3B subunit 1	SF3B1	145.83	1304	19.7018	20.0199	19.3368	19.3766	19.6896	20.0171	19.7877	19.8758	19.9007	19.3892	19.3203	19.6727	19.5428	19.1865	19.5795	19.6896	19.338	19.8267	19.1452	19.6589	19.6702	19.6572	19.3643	19.4753	19.5006	19.677	19.146	19.5412	19.4492	19.3946	19.8772	19.5165	19.3352	19.6824	19.1207	19.4866	19.4727	19.2045	19.6896	19.298	1.15949	0.0696708	1.09037	0.0995617
Q9NXW2	DnaJ homolog subfamily B member 12	DNAJB12	41.859	375	16.2569	15.7705	16.0392	16.4311	16.4218	16.3771	16.1767	16.4915	16.1847	16.0007	15.6609	16.2419	15.5986	16.5803	16.3144	15.8549	15.7924	16.068	15.8075	15.86	15.9742	15.8073	16.5983	15.6968	15.7551	15.8527	15.8079	15.7516	15.7601	15.3152	15.7938	15.67	15.9942	15.7148	15.7018	15.5681	16.0021	16.0918	15.7671	15.7937	1.17865	0.0697851	1.21051	0.00272941
O76070	Gamma-synuclein	SNCG	13.331	127	10.2601	10.3797	11.3659	10.9744	10.9744	10.4823	10.7818	11.8564	11.0101	12.2073	12.7678	12.678	10.8766	10.73	11.051	10.9441	12.5412	11.1396	13.0766	11.3266	11.8397	12.1324	11.4506	12.246	11.9182	11.3072	11.9122	11.7133	12.3453	12.3453	12.2146	12.3016	11.4299	12.8807	11.4817	12.2704	11.4203	12.3052	12.3973	11.5862	0.622469	0.0698185	0.658058	0.00727233
P07919	Cytochrome b-c1 complex subunit 6, mitochondrial	UQCRH	10.739	91	15.5717	15.7659	15.6906	15.6392	15.793	15.7497	15.3152	15.8228	15.921	15.4937	15.149	15.598	15.3842	16.1	15.4921	15.5935	15.4584	15.2368	15.389	15.4531	15.2539	15.3805	15.8003	15.7604	15.7741	14.7918	16.5021	15.5907	15.3906	14.9312	15.2593	15.3634	14.8593	15.4126	16.8314	16.2863	14.8912	15.0942	15.6889	15.734	1.14146	0.0699137	1.03601	0.70317
O75431	Metaxin-2	MTX2	29.763	263	16.8276	17.2812	16.0735	16.7784	16.2728	16.8797	16.7614	16.8567	16.8722	16.5218	16.5148	16.6928	16.4344	15.9076	16.2642	16.7943	16.5598	16.6221	16.4576	16.28	16.6294	16.6382	16.1604	16.68	16.4751	16.5836	17.4281	16.377	16.4536	16.2978	16.9046	16.3976	16.5112	16.7084	16.5662	16.68	16.4457	16.4512	16.918	16.928	1.19728	0.0700328	0.980056	0.762117
P78406	mRNA export factor	RAE1	40.968	368	18.5558	18.5644	17.8465	18.4207	17.5096	18.344	18.2008	17.9896	17.9465	18.2232	18.0383	17.7164	18.0241	17.5434	17.6309	18.3283	18.3056	17.7897	17.7913	17.8115	18.2628	18.0353	17.9206	18.3083	17.9724	18.3875	18.6394	18.3606	18.1106	18.3052	18.3869	18.1256	18.0179	18.3591	18.9269	18.156	18.531	17.8753	18.2294	18.2419	1.19929	0.0703103	0.853459	0.0178836
Q9Y3R5	Protein dopey-2	DOPEY2	258.23	2298	16.6872	16.9956	17.0363	16.7622	17.1364	16.8861	16.9118	16.8618	17.1742	17.9324	17.6807	17.0865	17.0815	17.8007	17.3054	17.2925	16.7444	17.1	17.7391	17.5443	17.3169	17.3612	17.1999	17.3966	17.709	16.9301	16.9405	17.4607	17.6222	17.5253	17.0915	17.3304	17.0465	17.3904	17.2965	17.7679	17.1666	16.8773	17.3825	17.0698	0.812754	0.0703202	0.92908	0.298455
Q9GZX7	Single-stranded DNA cytosine deaminase	AICDA	23.953	198	11.6052	13.9062	12.6035	10.8845	11.3948	10.765	11.2052	10.9524	10.5525	12.4565	13.0693	11.9146	12.8117	12.0495	11.6324	11.4293	13.7457	11.5437	12.6612	13.8917	11.5425	13.7456	12.3249	13.6217	12.839	11.7682	13.3976	13.2589	13.1112	14.2061	11.8501	13.6956	13.5163	12.4526	13.8892	13.2842	15.7402	12.1526	12.4198	12.0637	0.557737	0.0703877	0.503393	0.00422203
Q96HY6	DDRGK domain-containing protein 1	DDRGK1	35.61	314	11.9478	12.0354	11.6874	11.1815	11.9587	11.508	11.7316	11.9288	12.1537	11.8587	11.7105	11.4239	11.574	11.1828	11.9199	11.8922	11.1009	11.6168	11.5669	11.6274	12.2253	11.4972	11.4972	11.6477	11.5669	12.6469	11.4117	11.6704	11.6899	11.6274	12.2138	12.0906	11.9814	11.6874	11.2569	11.8114	12.3899	11.404	11.5857	11.7316	1.17906	0.070492	0.93218	0.339606
P60985	Keratinocyte differentiation-associated protein	KRTDAP	11.05	99	16.9973	15.4852	14.6113	15.5818	16.8196	16.2711	14.9193	15.1595	16.1455	14.1098	14.7185	14.8452	14.828	15.089	15.7436	15.2616	14.9048	14.8601	14.9078	14.9126	14.7086	15.7775	14.4504	14.5613	14.5134	14.8685	15.074	15.0085	15.4451	14.7547	14.6361	14.7237	15.1053	14.6631	15.0138	14.4629	14.827	15.1265	14.8616	15.4987	1.51879	0.0706715	1.32368	0.0358354
Q9NX55	Huntingtin-interacting protein K	HYPK	13.651	121	17.0862	17.0622	14.7938	16.7664	16.0922	16.8689	16.1829	16.2915	16.9846	15.4814	15.595	16.5539	15.2418	14.8152	16.0495	16.6824	15.4156	16.7883	14.8339	15.1312	16.0975	15.9869	14.8841	15.2574	14.9394	15.2297	15.6411	15.4131	15.9243	14.9984	16.1234	15.6472	15.1967	15.9711	15.295	15.6174	15.065	15.152	16.174	15.9858	1.56952	0.0708486	1.41997	0.0185984
P51858	Hepatoma-derived growth factor	HDGF	26.788	240	20.1934	20.5011	19.904	20.0128	19.5777	20.0932	19.9531	20.275	19.9395	19.201	18.7597	20.1601	19.892	18.8498	19.3603	20.6618	19.2541	19.8694	18.7715	19.6124	18.9501	19.2164	19.8346	18.853	18.9852	19.2225	18.8049	19.2837	19.3033	19.0721	19.3059	19.3708	19.1461	18.992	18.6301	19.6534	19.1197	18.735	19.3032	18.3709	1.36221	0.0709401	1.55234	9.54309e-05
Q08495	Dematin	DMTN	45.514	405	15.408	15.0594	15.3094	15.2665	15.8821	15.6826	15.1944	15.3253	15.4124	15.6497	16.0658	15.4029	16.0318	15.7229	15.4732	15.5301	15.9683	15.1112	15.8138	15.4922	15.3813	15.4696	15.4054	15.6244	16.033	16.1911	16.2258	15.5528	15.594	16.5909	15.2968	16.6722	16.3349	15.6746	16.1358	15.4221	15.198	16.6845	15.5861	16.4285	0.845431	0.070958	0.79279	0.0135546
Q9GZN4	Brain-specific serine protease 4	PRSS22	33.731	317	14.6573	14.3386	15.0653	14.783	15.0244	15.452	15.0033	15.1983	15.7337	14.5232	14.4672	14.6708	14.864	15.1965	14.7957	14.711	14.5655	14.372	14.5604	14.6511	15.1646	15.1432	14.5121	14.9494	14.6623	14.7288	14.5427	15.1343	15.0601	14.8383	14.9369	15.2081	14.4419	15.0462	14.6998	14.6024	14.7181	15.3355	15.1186	14.4602	1.22474	0.0712232	0.977034	0.74562
P02042	Hemoglobin subunit delta	HBD	16.055	147	20.7015	19.9325	20.7228	20.8753	20.7227	21.3847	20.5028	20.7538	20.5965	21.0761	21.4458	20.8402	21.5189	21.3047	20.8491	20.2417	21.1441	20.757	21.3697	21.0894	20.8578	21.1797	20.6142	21.2091	21.3847	21.3433	20.6911	21.5748	21.2581	22.216	20.5712	21.7753	22.1607	21.243	20.9704	20.5172	20.6132	22.4275	20.8321	21.1648	0.795979	0.0712281	0.790721	0.0365612
Q01082	Spectrin beta chain, non-erythrocytic 1	SPTBN1	274.61	2364	21.4629	21.5492	21.7766	21.6256	21.5837	21.6051	21.4418	22.0125	21.7542	21.9385	21.968	21.6887	22.1581	21.7267	21.8582	22.1686	21.7146	21.4344	21.9119	21.9053	21.945	21.7427	21.7962	21.9119	21.8385	21.8882	21.4984	21.9241	22.1613	22.1081	22.1581	22.1316	21.8368	22.0766	21.3759	22.0439	21.938	21.8385	21.6256	21.626	0.883662	0.0713327	0.927199	0.126036
Q9UNX3	60S ribosomal protein L26-like 1	RPL26L1	17.256	145	15.6745	15.5873	14.5774	15.2351	14.4945	15.7595	15.6108	15.2497	15.4149	15.4161	15.1337	14.7593	14.8433	14.0216	14.4347	15.5283	14.8972	15.4916	14.6735	15.3171	15.4916	15.3926	14.7018	15.1177	14.6702	15.7459	14.658	14.9401	15.0378	14.2204	15.9291	14.6917	14.7514	15.532	14.1423	15.6627	15.145	13.7532	15.4568	14.4192	1.31216	0.0715078	1.09662	0.439356
Q15056	Eukaryotic translation initiation factor 4H	EIF4H	27.385	248	14.5657	14.7997	14.5344	16.0658	14.567	14.7837	15.0254	15.6073	14.4215	14.87	14.6761	15.1543	13.9897	14.4855	14.7385	15.3993	14.0147	14.0651	13.8136	14.4082	14.7954	14.3298	14.4139	14.4741	13.6437	13.9359	13.9347	14.4353	14.8919	13.4537	14.8453	14.0154	13.6932	14.4478	12.9045	13.3424	13.7601	14.3685	15.6523	13.4326	1.36561	0.0715877	1.47504	0.00588627
Q56VL3	OCIA domain-containing protein 2	OCIAD2	16.953	154	16.844	17.343	16.7038	16.9839	17.0707	16.8478	17.1656	17.3589	16.4523	16.589	16.119	16.771	16.5816	16.8095	17.2445	16.9196	16.2307	17.0943	15.8559	16.4719	16.1861	16.0326	16.7634	16.1531	16.375	16.5062	16.0391	16.3631	16.5323	16.4854	16.3717	16.1739	16.5131	16.16	16.2389	16.3479	16.5986	16.1733	16.1155	15.9783	1.25364	0.0717487	1.38268	5.3452e-05
P54760	Ephrin type-B receptor 4	EPHB4	108.27	987	16.3387	15.7704	16.5768	16.0787	16.2331	16.5015	16.2375	17.0062	16.66	16.4065	16.7421	16.7074	16.4173	16.5288	16.9311	16.6211	16.9328	16.4014	16.684	16.2817	16.3523	16.2704	16.571	16.614	16.8945	16.3031	16.7668	16.404	16.2698	16.7367	16.3704	16.6425	16.4933	16.3917	17.1646	16.4658	16.6175	16.0524	16.429	17.56	0.844495	0.0718989	0.955523	0.525021
Q15651	High mobility group nucleosome-binding domain-containing protein 3	HMGN3	10.666	99	14.9414	14.9166	13.9074	14.0561	13.7866	15.601	13.8232	14.1242	14.9078	13.7985	13.359	14.3818	14.692	12.8314	12.9093	15.3312	13.3086	13.6812	13.458	13.685	12.8314	13.3401	13.4925	12.9977	13.3917	12.9824	13.4102	13.4192	13.5771	12.9992	13.7733	14.4269	12.7063	13.2613	13.1817	13.9374	12.2071	13.9105	13.5145	12.3583	1.53955	0.071971	1.72797	0.00060225
B0I1T2	Unconventional myosin-Ig	MYO1G	116.44	1018	17.6456	17.2788	18.0193	17.5043	17.8629	17.6193	17.9298	17.32	17.9334	17.7058	17.6191	18.2137	17.7758	18.2218	18.0425	17.6971	17.8838	18.4821	17.4869	17.8364	17.888	17.8193	18.1922	17.6403	17.5694	18.2819	17.5389	17.6967	17.9341	17.6933	17.6398	17.6077	18.0694	17.7675	17.5561	17.7935	18.0975	17.931	17.5232	17.5381	0.8444	0.0720444	1.01046	0.861867
P55083	Microfibril-associated glycoprotein 4	MFAP4	28.648	255	17.6415	17.6588	18.7079	17.5492	17.5451	17.3726	16.9417	18.0286	17.261	19.7519	19.5568	18.0295	20.4494	18.7671	17.9778	17.8598	18.1878	17.5801	18.8357	18.4625	18.378	18.3746	18.6413	19.5782	20.6011	18.3812	18.895	18.678	19.1796	19.1573	18.6243	19.1972	18.3076	18.1183	18.6352	19.0712	19.0267	18.7096	18.3072	17.3158	0.605073	0.0720748	0.682717	0.0337574
P09661	U2 small nuclear ribonucleoprotein A	SNRPA1	28.415	255	16.5047	16.3525	16.0773	16.4597	16.1365	16.5086	16.3703	16.38	16.587	16.0816	15.9972	16.2891	16.0054	16.2512	16.4664	16.5494	15.8197	16.1664	15.6786	16.2377	16.0813	16.3769	16.1915	16.4819	16.3983	15.7966	15.8626	16.2943	16.2791	15.5721	16.1802	15.8387	15.7065	16.1765	16.131	16.3567	15.6049	16.1521	16.444	15.7541	1.14846	0.072103	1.11884	0.0659787
Q8IWA4	Mitofusin-1	MFN1	84.159	741	16.2242	16.152	16.3695	16.5233	16.2197	17.1333	16.3918	16.2747	16.3295	16.2	16.0389	16.43	15.966	15.9393	16.6804	16.263	15.9753	16.112	16.1397	16.0249	16.1041	15.9969	16.4196	16.1659	16.1985	16.0486	16.6317	15.8095	15.7947	15.9106	16.043	16.1131	16.1677	16.2265	15.9109	16.2347	16.0877	15.9201	16.1189	16.6615	1.16865	0.0721286	1.10281	0.0920071
Q96LD4	Tripartite motif-containing protein 47	TRIM47	69.531	638	14.4078	13.735	14.3368	13.7733	13.7387	14.0193	14.1082	14.1951	14.502	14.6159	14.4181	14.5286	14.1037	14.4534	14.6563	14.1117	14.3054	14.4996	14.6011	14.091	14.4716	14.2169	14.5627	14.639	14.3659	14.3751	14.1328	14.4419	14.542	14.3664	14.4383	14.2106	14.6066	14.2014	15.3411	14.4364	14.8157	14.4265	14.3006	14.9124	0.850445	0.0726158	0.852563	0.0155078
Q6UN15	Pre-mRNA 3-end-processing factor FIP1	FIP1L1	66.526	594	16.3428	16.6863	14.5901	15.5888	15.5022	16.5101	15.8712	16.0382	16.2585	15.1393	14.8533	16.2737	14.9831	14.5803	15.1818	16.2789	14.9042	15.2476	15.9226	14.8554	15.4693	15.2033	14.652	15.1988	15.0255	15.5221	14.8645	15.5046	15.6675	15.218	15.98	14.8366	14.8568	15.1662	14.4023	15.2675	14.9744	14.7679	15.2373	14.7008	1.45867	0.072662	1.37046	0.0132668
Q69YN4	Protein virilizer homolog	KIAA1429	202.02	1812	17.5509	17.7144	17.6139	17.6682	17.6497	17.5289	17.4523	17.44	17.5975	17.4944	17.4278	17.5499	17.4991	17.4923	17.4811	17.5654	17.4016	17.5811	17.3974	17.5987	17.4675	17.6057	17.4967	17.5557	17.4294	17.6473	17.3527	17.555	17.5254	17.7994	17.5619	17.5537	17.5648	17.6875	17.2818	17.4994	17.5392	17.5086	17.5495	17.4615	1.05087	0.0727129	1.00215	0.923435
Q9UN37	Vacuolar protein sorting-associated protein 4A	VPS4A	48.897	437	15.0597	15.2194	14.5982	14.9639	14.8571	14.8296	15.3506	15.1396	15.034	14.9977	15.0528	14.6703	15.0324	14.7598	14.3892	14.9494	15.0628	14.7108	14.9328	14.6334	14.9746	14.8277	14.6985	14.9551	15.0399	15.2854	15.0802	14.9016	14.7528	14.6977	15.1551	15.0927	14.7687	15.1291	15.6255	14.9902	15.0345	15.5149	15.3581	15.1118	1.13729	0.072722	0.909071	0.0820029
Q07666	KH domain-containing, RNA-binding, signal transduction-associated protein 1	KHDRBS1	48.227	443	19.8868	19.7139	19.7927	19.6513	19.7258	20.1881	19.8855	19.8285	19.5087	18.942	18.9107	19.6182	19.6473	19.3089	19.5668	19.8306	19.3073	19.6636	19.1645	19.5366	19.0354	19.3424	19.8868	19.0026	19.1689	19.1973	18.8613	19.2856	19.1712	19.0784	19.2866	19.384	19.6182	19.0511	18.7441	19.5195	19.2666	18.9893	19.0266	18.7496	1.1949	0.0728809	1.32006	0.00016413
P02794	Ferritin heavy chain	FTH1	21.225	183	20.1396	20.1845	20.3085	19.5465	20.0506	19.8996	20.3757	20.1054	20.0402	20.5401	20.4354	20.5623	20.3634	21.5397	20.2007	20.1286	20.4812	20.7466	19.6685	20.3895	19.9287	20.23	20.1284	20.6687	21.2185	19.9514	20.6096	20.332	21.2136	20.7184	21.1128	20.0307	22.3703	20.7629	20.0916	21.7755	20.3776	19.8761	20.5759	19.9967	0.794147	0.0731256	0.80488	0.0823785
Q14534	Squalene monooxygenase	SQLE	63.922	574	16.2473	16.5826	16.0304	16.297	16.122	16.4929	15.5955	16.1154	16.7313	15.722	16.015	16.4592	15.8096	16.3651	15.8607	15.3986	15.5562	15.7875	15.8033	15.9678	15.5804	15.6989	15.8507	16.3993	16.235	15.5773	15.6803	15.7818	15.8007	16.1234	15.6279	15.8242	15.463	15.7832	15.3819	16.1333	15.6431	16.2731	16.2212	16.0124	1.22378	0.0731815	1.14347	0.0721105
P53602	Diphosphomevalonate decarboxylase	MVD	43.404	400	16.0968	16.2332	16.4843	16.4449	15.7678	16.2697	16.2424	16.2567	15.9599	15.9404	16.0412	15.786	16.2729	15.8458	15.69	15.831	16.1072	15.9561	16.3764	15.8883	16.1531	16.0312	16.7727	16.3262	16.2851	16.0966	16.419	16.0676	16.0647	16.2258	16.1438	16.2866	16.003	16.2577	16.0085	16.0277	15.9809	16.719	16.4807	15.7415	1.14086	0.0732222	0.913814	0.101534
P84103	Serine/arginine-rich splicing factor 3	SRSF3	19.329	164	18.1628	18.0696	17.5411	17.2033	17.3603	17.9285	18.1489	18.0357	17.6089	17.2614	17.354	17.6912	17.6844	16.9527	17.3232	18.0071	17.273	17.5236	17.1411	17.4493	17.4724	17.3667	17.739	17.3129	17.2459	17.7466	16.9762	17.3636	17.4354	17.0586	17.575	17.1576	17.55	17.3296	16.9564	17.6689	17.7779	17.1357	17.4898	16.8777	1.22439	0.0732888	1.16814	0.0344608
Q13177	Serine/threonine-protein kinase PAK 2	PAK2	58.042	524	18.2052	17.9459	17.684	18.1904	17.8948	18.6401	18.1725	17.9437	18.3281	17.609	17.6059	18.0738	18.0587	17.6334	17.8479	18.013	17.8603	18.0038	17.588	17.7446	17.8168	18.4378	17.4723	17.7366	17.7268	17.8985	17.6405	17.789	17.6367	18.0144	17.9058	17.8744	17.9566	17.7154	17.4713	17.6321	17.7011	18.0229	17.6543	17.821	1.16346	0.0733519	1.11414	0.0533389
O14791	Apolipoprotein L1	APOL1	43.974	398	16.658	17.1269	17.1287	16.5666	16.9792	16.7503	16.867	17.1902	16.7959	16.9158	17.0639	17.3866	16.8323	17.4563	17.3369	16.7808	17.1056	16.9905	17.0935	16.8473	17.588	17.221	17.0804	17.4604	17.4295	17.2288	17.1772	17.5905	17.2905	17.5693	17.068	17.2497	17.1519	17.0794	16.9114	17.0922	17.4021	17.6678	17.0511	16.8737	0.875696	0.0734484	0.831891	0.00105813
Q13586	Stromal interaction molecule 1	STIM1	77.422	685	18.0162	18.0295	17.7041	17.9937	18.0722	18.2399	17.3695	17.717	17.5443	18.0285	17.6706	17.6898	17.4091	17.3213	17.577	18.0005	17.8367	17.9024	17.7089	17.5074	17.8374	18.1498	17.6792	17.6854	17.492	17.355	17.8656	18.0055	17.786	17.7285	17.8331	17.735	17.4734	17.8004	17.3477	17.5747	17.5189	17.2593	17.6416	17.9934	1.15599	0.0734772	1.05616	0.323031
Q13188	Serine/threonine-protein kinase 3	STK3	56.3	491	18.4661	18.1536	18.0516	17.9733	18.1178	18.0957	18.1299	17.9143	18.2855	17.6449	17.5284	17.8845	18.0364	18.2153	18.0385	17.8954	17.774	17.9588	18.0562	17.6292	17.7508	17.8885	17.9894	17.6335	17.8694	18.2352	18.0062	17.5254	17.5067	17.6923	17.6301	17.7392	18.113	17.6301	17.3512	17.7312	18.108	17.9393	17.6059	18.0757	1.13414	0.0736106	1.14189	0.013299
P62244	40S ribosomal protein S15a	RPS15A	14.839	130	18.6114	17.889	18.0293	18.664	18.2897	18.2272	18.2258	17.7485	17.9483	18.0578	17.7027	17.8882	18.1748	17.6623	17.7977	18.4387	17.8136	18.0006	17.7408	18.1393	17.7369	17.74	18.0609	17.6415	17.5491	17.9416	17.589	17.7988	17.6708	17.6625	17.5366	17.6098	18.2217	17.7199	18.5634	17.6107	17.7363	17.5703	17.8181	17.7228	1.17544	0.0736859	1.21205	0.00275276
P49327	Fatty acid synthase	FASN	273.42	2511	21.6937	21.7293	20.9009	21.2394	21.4172	21.1171	20.9661	21.5806	21.5126	21.0647	20.8393	21.9797	20.7429	20.5934	21.127	21.0365	20.672	20.8401	21.2645	21.1036	21.3915	21.2368	20.8647	21.1442	20.8401	20.8264	20.4085	21.2823	21.3335	21.2108	21.0091	20.8736	20.8496	21.3054	20.2361	20.645	20.8514	21.2187	21.8867	20.5554	1.23308	0.0736876	1.12704	0.160507
P05386	60S acidic ribosomal protein P1	RPLP1	11.514	114	15.3222	15.279	14.9138	15.2452	14.7394	15.1466	14.7292	14.9299	14.2919	15.213	14.7981	14.9237	14.6825	14.207	14.1091	15.1134	14.5305	14.8577	14.8265	14.9802	14.9693	14.9478	14.6382	14.8159	14.6936	15.0306	14.8505	15.1343	14.6818	15.3315	14.9679	14.8666	14.7375	15.0283	14.207	14.8656	14.7372	14.1451	15.2452	14.6905	1.21264	0.0737326	1.00885	0.901332
Q15814	Tubulin-specific chaperone C	TBCC	39.248	346	14.3303	13.815	13.9049	14.5265	14.3299	14.1528	13.4494	13.9137	13.3889	13.5211	13.218	13.9069	13.7605	13.6037	13.7438	13.9724	13.6062	13.7359	13.3045	13.6926	13.7034	13.2442	13.9235	13.2282	13.0952	13.0571	13.2718	14.0223	14.8493	13.666	13.5054	13.422	13.4419	13.7826	12.7341	13.2806	13.2806	13.1681	13.5077	13.5095	1.21318	0.0737641	1.239	0.0194528
Q86TI2	Dipeptidyl peptidase 9	DPP9	98.262	863	17.1263	17.3628	16.873	16.8217	16.8564	16.7796	17.4203	16.9832	16.8979	16.8509	16.821	16.8873	16.8787	16.6443	17.1	16.7737	16.8277	16.806	16.8095	16.8834	17.2267	16.8494	16.7892	16.8862	16.8784	17.9523	16.8908	16.9102	16.7417	16.6929	17.1677	16.801	16.9225	17.0008	16.5331	16.7947	17.3176	16.9268	16.7968	16.8204	1.11269	0.0737655	0.982968	0.756778
Q04756	Hepatocyte growth factor activator	HGFAC	70.681	655	13.2683	13.3704	13.8084	13.4188	13.4474	13.3704	13.8524	13.5558	13.4696	13.645	13.7595	13.4338	13.8604	13.9587	13.7636	13.2959	13.941	13.3203	15.1606	14.1389	14.1712	13.6888	13.5123	13.9746	14.1943	13.6741	14.399	14.2558	13.9242	14.1255	13.8159	14.1244	14.0108	14.0954	14.7948	13.9788	13.5591	14.4051	13.6537	14.4923	0.788604	0.0738494	0.784295	0.00658959
Q15847	Adipogenesis regulatory factor	ADIRF	7.8547	76	16.9946	16.5757	16.5045	16.7885	16.5643	16.5193	16.3252	16.421	16.3919	17.2534	17.5321	16.9786	16.623	16.5684	16.6872	16.7803	16.8794	16.9085	17.7057	16.6085	17.2719	17.6607	16.3519	17.0138	17.0203	16.6676	17.6123	17.0349	17.385	17.8509	17.2152	17.2531	16.8139	17.3741	16.2381	16.9227	16.4037	18.4752	17.3095	17.2239	0.816034	0.0741716	0.771402	0.0135407
P10643	Complement component C7	C7	93.517	843	18.1775	18.0784	19.3183	18.6683	18.5014	18.2228	18.644	18.3908	18.0999	19.0524	19.2909	19.0127	18.8466	20.1248	18.7055	18.1353	18.6874	18.4382	19.5976	18.6193	18.9405	18.7607	18.9222	19.8394	19.4169	18.5799	19.0625	19.1178	19.3706	18.9245	18.6684	18.5467	18.5346	19.3408	18.6456	19.004	18.6397	18.9183	19.1922	19.1623	0.742025	0.0743264	0.84161	0.0909912
P15144	Aminopeptidase N	ANPEP	109.54	967	19.8615	19.2373	19.4172	19.5507	19.1033	18.9933	19.9007	19.6199	19.3494	19.4208	20.0165	19.4966	19.7987	20.0848	19.4198	19.3472	19.7725	19.4342	19.7753	19.6537	20.0202	19.7441	19.3014	19.9898	19.9425	19.7619	19.5352	19.6838	19.8509	20.359	20.5317	19.8677	19.7587	19.8827	19.1343	20.0648	20.464	19.634	19.6961	19.3955	0.849967	0.0743597	0.830322	0.0137478
P62195	26S protease regulatory subunit 8	PSMC5	45.626	406	18.5796	18.7802	18.4466	18.556	18.3921	18.7243	18.3958	18.3865	18.6694	18.418	18.4159	18.3979	18.541	18.1144	18.2346	18.5113	18.5159	18.5438	18.3842	18.4618	18.5206	18.5341	18.3343	18.4514	18.3596	18.4991	18.5885	18.4618	18.602	18.5213	18.5657	18.5882	18.6702	18.5419	18.4341	18.3661	18.6392	18.3676	18.5178	18.5085	1.08882	0.0743701	0.979336	0.462784
P01009	Alpha-1-antitrypsin	SERPINA1	46.736	418	21.5939	21.543	22.9218	21.6635	21.8508	21.8739	21.5826	21.9788	21.9341	22.4106	22.6986	21.8795	22.2991	22.4868	22.3334	21.6095	22.1364	21.9538	23.2762	22.5025	22.8157	22.2308	22.2991	23.1874	22.7086	22.553	21.9964	23.3937	23.2505	22.9431	22.8157	22.6507	22.3334	24.1208	21.7021	22.935	22.7682	23.5109	23.1147	21.9964	0.767223	0.0744222	0.641774	0.000528915
Q8N5C6	S1 RNA-binding domain-containing protein 1	SRBD1	111.77	995	15.4053	14.9754	15.3246	15.1224	15.4224	15.1224	15.0783	15.0586	15.32	15.5347	15.4144	15.668	15.1399	15.6151	15.8285	14.9898	15.2476	15.2476	15.6453	15.5319	15.2934	15.2562	15.1333	15.2702	15.3847	15.8765	15.6256	15.3252	15.2289	15.479	15.2372	15.3129	15.4333	15.0254	14.7968	15.4018	15.7088	15.6258	15.1473	15.6439	0.87273	0.0745532	0.982337	0.746985
P27695	DNA-(apurinic or apyrimidinic site) lyase	APEX1	35.554	318	19.5454	20.0462	19.903	19.0363	19.457	20.9374	19.9027	19.9578	18.9394	19.0688	18.7168	18.8402	20.0926	19.0449	18.2466	19.8886	19.044	19.524	18.7787	19.6013	18.5996	19.3208	19.8094	18.9879	19.1286	18.8701	18.529	19.5256	19.4554	18.7376	19.1184	18.9709	18.9039	19.2501	18.1112	19.5291	18.6285	18.8348	19.1308	18.4229	1.4158	0.0746729	1.35222	0.0145344
P49915	GMP synthase [glutamine-hydrolyzing]	GMPS	76.715	693	19.2942	19.6814	18.9976	19.4304	18.96	19.0186	18.976	19.24	19.4678	18.6358	18.7595	18.9602	19.0433	18.9124	18.7475	19.4582	18.8801	18.7551	18.887	19.0592	18.9669	18.832	18.8093	18.7835	18.7613	18.8906	18.773	18.9523	18.9812	18.9287	18.8105	18.836	18.8739	18.9325	18.6053	18.7551	18.9445	19.0369	18.8535	18.9416	1.1679	0.0748938	1.14455	0.00610173
Q9UGT4	Sushi domain-containing protein 2	SUSD2	90.207	822	17.1925	17.347	17.3892	17.1418	17.0066	16.9249	16.6938	17.2401	16.9813	17.2891	17.4978	17.227	18.2604	17.0988	16.9294	17.3194	18.3314	16.8885	17.5274	17.3645	17.4691	18.0167	17.2853	18.0051	17.7343	17.1156	17.8615	17.6791	17.6391	18.0983	17.6088	17.217	18.3665	17.6619	17.4391	18.3125	17.8988	17.3389	17.3942	17.7779	0.79894	0.0753548	0.750824	0.00147138
P57081	tRNA (guanine-N(7)-)-methyltransferase non-catalytic subunit WDR4	WDR4	45.489	412	16.9728	17.0056	15.9469	16.9182	16.4364	15.9937	16.5429	16.1621	16.9238	17.1344	15.9447	16.5514	16.2687	15.8787	16.6288	16.9222	16.3218	16.1591	16.0354	15.9547	16.0266	15.8155	15.8283	15.8478	15.4899	16.0017	15.9023	15.881	15.8195	15.8705	15.9814	16.0523	16.1628	15.8072	16.405	15.837	15.9023	15.6393	16.5756	15.758	1.26324	0.0753863	1.41904	4.40153e-05
O95352	Ubiquitin-like modifier-activating enzyme ATG7	ATG7	77.959	703	17.3202	17.228	17.7885	17.4645	17.7662	17.5359	17.3246	17.3604	17.4282	17.7287	17.7441	17.5361	17.5523	17.8627	17.5741	17.4756	17.625	17.5413	17.7283	17.7176	17.7504	17.5984	17.7692	17.8522	17.877	17.6341	17.9179	17.8587	18.1277	17.9357	17.754	17.7699	17.7869	17.9164	18.594	17.8941	17.7772	17.8434	17.653	17.9539	0.906758	0.0754513	0.813319	2.29737e-05
Q9H6U8	Alpha-1,2-mannosyltransferase ALG9	ALG9	69.863	611	13.4329	12.6736	13.1466	13.5504	13.3833	13.3014	13.0625	12.9642	13.1885	14.1308	13.3715	12.8576	12.9174	12.8415	12.7072	13.0296	12.6956	13.4975	12.9002	13.1815	13.2741	12.6862	13.007	13.768	13.8626	13.7147	12.8761	12.8082	12.8706	13.1375	13.1845	13.1185	13.4014	12.9994	13.5399	13.2171	13.3157	12.9927	13.0581	12.8082	1.21712	0.0754891	0.972429	0.71492
P21980	Protein-glutamine gamma-glutamyltransferase 2	TGM2	77.328	687	18.24	18.4496	18.8869	18.4812	18.7362	18.2108	18.4223	18.5094	18.104	18.434	18.7084	18.2547	19.5394	19.1282	18.5005	18.2289	19.5239	18.4492	18.5975	18.7233	19.2883	18.7005	18.5804	18.7494	19.0315	18.7494	19.494	18.7919	18.5417	19.0745	18.5244	18.7101	19.0256	18.3655	19.2463	19.0068	19.9408	18.7944	18.327	19.3816	0.802197	0.0755012	0.80676	0.0201663
O00186	Syntaxin-binding protein 3	STXBP3	67.764	592	18.3155	18.4762	18.9244	18.5872	18.6505	18.7312	18.8095	18.6728	18.6174	18.9272	18.9147	18.6782	18.9375	18.713	18.8338	18.6896	18.9216	18.7491	19.0763	18.6273	18.9064	19.2325	18.9787	19.7479	19.102	18.9983	19.127	19.0953	19.0612	19.3088	19.0956	19.1868	19.2037	19.1293	19.0657	18.9815	18.9956	19.4551	19.0726	19.0415	0.905691	0.0755129	0.759626	5.24362e-08
Q9UJW0	Dynactin subunit 4	DCTN4	52.337	460	18.3975	18.2911	18.3036	18.6943	18.1305	18.1782	18.3976	18.4029	18.2048	18.4698	18.8663	18.4154	18.8485	18.0651	18.2849	18.3494	18.7807	18.494	18.9002	18.4413	18.4446	18.407	18.4041	18.5787	18.6896	18.3784	18.3273	19.1445	19.0374	18.5682	18.4603	18.7237	18.9829	18.6322	18.5802	18.4336	18.4697	18.8599	18.4349	18.4471	0.87202	0.0755825	0.898501	0.0519089
Q99615	DnaJ homolog subfamily C member 7	DNAJC7	56.44	494	18.6642	18.5498	18.1557	18.4916	18.4855	18.4831	18.06	18.2719	18.9934	17.8567	17.5358	18.3114	18.0185	18.1194	18.7378	18.3454	17.9957	18.3737	17.7107	18.0325	18.069	18.1346	18.2307	17.8374	17.6345	18.0482	17.7992	18.1477	18.0211	17.6617	18.0094	17.8243	17.8224	18.0248	17.7719	17.7726	17.9498	18.5564	18.2593	18.1207	1.21681	0.075641	1.20986	0.00609422
P35858	Insulin-like growth factor-binding protein complex acid labile subunit	IGFALS	66.034	605	15.5326	15.4994	15.272	15.2907	15.1767	15.5895	15.5198	15.3323	15.1129	15.8639	16.2324	15.3722	15.7084	15.45	15.3172	15.383	15.7024	15.6785	16.0474	15.5368	15.6227	15.9643	15.3831	15.8886	15.803	15.6118	15.6828	15.9756	15.7985	16.1363	15.3971	15.881	15.931	15.5489	15.7925	15.7812	15.9118	15.8266	15.3902	15.4276	0.856275	0.0757816	0.866439	0.0139354
Q9H2P0	Activity-dependent neuroprotector homeobox protein	ADNP	123.56	1102	14.4812	14.7225	14.2096	14.5683	14.0237	14.5717	14.5305	14.4074	14.4856	14.2554	14.0028	14.4836	14.4019	13.8127	14.5436	14.5568	14.2917	14.1013	13.9421	14.1067	14.1422	14.073	14.2997	14.2467	14.1246	14.078	13.7873	14.0235	14.009	14.1693	14.4277	13.933	13.9602	14.2589	14.0202	14.1976	14.0408	13.6261	14.2632	14.0066	1.14971	0.0759068	1.18146	0.00145757
Q9UI30	Multifunctional methyltransferase subunit TRM112-like protein	TRMT112	14.199	125	13.3642	13.2996	13.1235	13.431	13.3268	13.182	13.2907	13.1249	13.234	13.3262	13.2958	13.1808	13.1508	12.7272	13.0524	13.5131	13.0398	13.3177	12.8971	13.0708	13.4516	12.932	12.8834	13.2315	13.173	13.2235	13.2907	13.0511	13.1094	13.2748	13.1687	13.0916	13.4868	13.0397	13.5955	13.0666	13.1258	12.7354	13.8616	13.6237	1.10631	0.0762455	0.983915	0.752023
P12109	Collagen alpha-1(VI) chain	COL6A1	108.53	1028	21.2555	20.995	21.9945	21.2108	21.0632	20.9259	21.1676	21.4682	21.3378	22.5931	22.3743	21.6492	22.3743	21.43	21.2555	21.5171	21.8975	21.1458	22.9334	22.006	21.5365	21.8673	21.7752	21.953	22.0403	21.4411	21.8614	21.6622	22.2098	22.1189	21.5809	21.6243	22.2877	21.7752	21.6243	21.8422	21.7945	22.1649	21.622	21.2217	0.728426	0.0764713	0.888556	0.241376
Q9UHV9	Prefoldin subunit 2	PFDN2	16.648	154	17.9732	18.0037	17.6401	17.647	17.9271	17.994	17.6366	17.7357	18.1938	17.319	17.3998	17.8483	17.4508	17.2611	17.675	17.7714	17.671	17.9532	17.4327	17.6045	17.6618	17.4233	17.6689	17.2061	17.2017	17.3519	17.4579	17.3838	17.5183	17.3726	17.5782	17.5107	17.7008	17.3784	17.1409	17.2523	17.4537	17.3353	17.3308	17.3199	1.14891	0.0765257	1.22649	8.41252e-05
Q96SI9	Spermatid perinuclear RNA-binding protein	STRBP	73.652	672	17.1669	18.0186	17.4724	16.8721	17.2185	17.5071	17.5854	17.2442	16.9974	17.2081	16.9862	16.9268	17.0456	16.8899	17.2628	17.5719	16.8522	16.956	17.0605	17.349	17.0757	17.0472	17.49	17.5267	17.4603	16.6986	16.7392	17.5234	17.1757	16.7851	17.3162	17.02	16.7046	17.1813	16.8013	17.6237	16.5786	16.8574	17.3413	16.7677	1.18016	0.0766006	1.08967	0.226546
Q9UEY8	Gamma-adducin	ADD3	79.154	706	18.0188	18.4869	18.4885	17.8803	18.0319	18.1992	18.0888	18.4174	18.0009	18.3133	18.5219	18.0484	19.012	18.4423	18.0396	18.637	18.4068	17.9886	18.6006	18.5418	18.7066	18.6209	18.3498	18.8044	18.6785	18.3896	18.4813	18.6993	18.8595	18.8619	18.7813	18.8623	18.6275	18.7224	18.2839	18.7868	18.5715	18.8414	18.6319	18.4504	0.851861	0.076652	0.788778	7.14624e-05
Q6XZF7	Dynamin-binding protein	DNMBP	177.35	1577	14.4109	15.0979	14.6949	14.322	14.5001	14.3642	14.6787	14.6527	14.6129	14.4256	14.5231	14.8652	14.5138	14.991	14.9402	14.6684	14.8946	14.6866	14.8164	14.5753	14.6999	14.5626	14.7387	15.0944	14.762	14.5657	14.7448	14.9047	14.909	15.3495	14.64	14.7087	14.6605	14.7516	15.3288	14.8809	14.5416	14.9704	14.8497	14.5364	0.887947	0.0767548	0.902332	0.0451228
Q96CD0	F-box/LRR-repeat protein 8	FBXL8	40.516	374	14.379	14.2322	14.9724	14.6246	14.51	14.3632	14.5943	14.8335	14.7136	15.2433	15.1925	14.813	14.6609	14.6574	14.9559	14.678	14.7961	14.5517	15.2827	15.4438	15.3264	14.9276	14.7465	15.0067	15.3346	15.3994	14.5853	14.73	14.8223	15.2344	15.1515	15.2885	15.1834	15.1925	14.3302	15.0398	15.2964	15.2179	14.7192	15.0835	0.837051	0.0768829	0.837469	0.0125183
P41223	Protein BUD31 homolog	BUD31	17	144	16.5406	16.5313	16.6588	16.5013	16.4421	17.0396	16.7461	17.2262	16.6989	16.5623	16.4414	16.4632	16.848	16.45	16.5358	16.7146	16.3403	16.6099	16.0857	16.5206	16.5384	16.3483	16.4196	16.5409	16.4878	16.7431	16.4769	16.4229	16.3981	16.2939	16.7511	16.4783	16.1275	16.8148	16.5754	16.7154	16.7217	16.2259	16.5209	16.4902	1.14375	0.0769288	1.06679	0.180556
O00567	Nucleolar protein 56	NOP56	66.049	594	17.2693	17.7014	16.7353	17.3589	16.9571	17.9017	17.3653	17.5954	17.4636	16.8961	16.7332	16.7341	17.097	16.9389	16.6194	17.7362	17.0457	17.0641	17.0665	17.2973	16.7952	16.7462	16.7599	16.9865	17.0982	17.0445	16.8276	17.3558	17.255	16.7546	17.1213	16.8834	16.5041	17.2265	18.6831	17.3301	16.634	16.5896	17.3567	16.7775	1.22363	0.0770649	1.10369	0.293009
O95363	Phenylalanine--tRNA ligase, mitochondrial	FARS2	52.356	451	16.8115	16.4976	16.8439	16.3306	16.1482	16.4077	16.5985	16.6894	16.874	16.8772	17.0807	16.9274	16.8886	16.9295	17.1253	16.2799	17.0081	16.3422	17.0694	16.7601	17.2205	16.5412	16.7967	17.1848	17.473	16.9285	17.0516	16.743	16.7327	17.2309	17.0657	17.0107	17.248	17.0287	16.3754	17.1643	16.738	17.3934	17.0428	16.9713	0.850699	0.0771802	0.827845	0.00472081
P02765	Alpha-2-HS-glycoprotein	AHSG	39.34	367	18.5379	18.5312	19.1993	18.9092	18.6606	18.8438	18.6266	18.524	18.6258	19.086	19.0379	18.7804	19.7515	19.1441	18.7561	18.5963	19.0479	18.657	19.175	19.0511	19.0358	19.1016	18.9051	19.9002	19.4657	19.1997	19.3766	19.6761	19.6378	19.4943	19.0176	19.419	19.0266	19.217	19.5581	19.3348	19.0815	19.8255	19.3371	19.3747	0.84363	0.0772386	0.720895	1.16059e-05
O43660	Pleiotropic regulator 1	PLRG1	57.193	514	17.9413	18.0753	18.0371	18.0785	18.4505	18.1629	18.1229	17.8882	18.1996	17.8231	17.861	18.022	17.8361	17.8774	18.2062	18.0461	17.8795	18.0114	17.89	17.8914	18.3098	18.1863	18.1814	17.9827	17.7662	17.9462	17.5374	17.751	17.7781	17.843	18.0956	18.0371	17.8713	18.3735	18.1053	17.7899	18.1285	18.0071	18.4543	17.6543	1.09115	0.0773151	1.01753	0.703011
P23743	Diacylglycerol kinase alpha	DGKA	82.629	735	17.7436	17.8181	18.1673	17.5343	17.5645	17.5423	17.8219	17.8965	17.7865	18.3006	17.8756	17.7922	17.9533	18.3327	19.2275	17.6048	18.9404	17.9545	17.7971	18.1789	17.891	17.8338	18.2168	18.301	17.9681	17.7578	17.5451	18.5436	18.1139	17.7241	18.0547	17.9774	17.9234	18.0031	17.6281	17.8265	17.7557	17.9689	17.9573	17.6061	0.78559	0.0773304	1.04377	0.587103
P18583	Protein SON	SON	263.83	2426	17.8742	18.1176	17.2794	17.5027	17.8	17.5659	17.7789	17.8822	18.0175	17.3107	17.3207	17.619	17.5158	17.2095	17.5072	17.7534	17.432	17.8518	17.1887	17.5963	17.6315	17.7039	17.1288	17.5673	17.2678	17.8775	17.2492	17.6055	17.5187	17.3352	17.8596	17.5957	17.1288	17.7001	17.0479	17.6182	17.6472	16.9598	17.5329	17.1381	1.15947	0.0773427	1.10995	0.0896281
Q8TCT8	Signal peptide peptidase-like 2A	SPPL2A	58.143	520	14.0761	14.1233	14.8455	14.417	14.5952	15.1788	14.6485	14.8956	13.5975	13.875	13.6253	14.2547	14.0761	14.8937	13.5831	14.2765	14.3014	13.9076	13.6199	13.8956	13.483	13.9547	14.9036	13.8749	13.9501	13.4232	14.4558	13.9337	13.9643	13.9192	13.5944	13.7811	13.723	13.9466	14.3319	14.4343	13.9161	13.479	13.8562	13.9291	1.30303	0.0774242	1.22401	0.0375355
P22528	Cornifin-B	SPRR1B	9.8875	89	21.3941	20.3262	18.9729	21.585	20.8826	20.5553	19.8286	18.7545	20.9921	18.6862	18.4836	20.4629	18.6425	19.2483	20.1979	19.7075	19.6709	19.4523	19.4744	19.2612	18.8094	20.4015	19.0354	19.0757	19.2486	19.3102	18.969	19.0601	19.7743	19.1021	18.5964	18.3309	18.4624	18.8869	18.875	18.8916	19.2826	19.5894	19.258	19.1727	1.66741	0.0774889	1.64987	0.00368719
Q96SB3	Neurabin-2	PPP1R9B	89.333	817	16.6255	16.2633	16.9393	16.933	16.851	16.3241	16.7261	16.7305	17.036	16.0515	16.2046	16.3748	16.5799	16.549	16.2317	16.408	16.5112	16.7268	16.3966	16.3214	16.5307	16.5025	16.9282	16.322	16.2296	16.5857	16.1889	16.3319	16.4244	16.4129	16.2931	16.4852	16.8303	16.4095	16.0659	16.3061	16.6798	16.2174	16.3581	16.2223	1.16283	0.0776969	1.08899	0.125707
Q5VW36	Focadhesin	FOCAD	200.06	1801	15.8709	15.3153	15.6354	15.3212	15.5804	15.5743	15.5021	15.4717	15.4243	15.693	15.6894	15.6397	15.7738	16.3951	15.6194	15.6194	15.6476	15.4758	15.8687	15.5094	15.5981	15.56	15.7001	15.7682	15.9007	16.2692	15.6506	15.5813	16.1754	15.7652	15.6582	15.6734	15.6507	15.6569	15.4474	15.6621	15.689	15.8889	15.7231	15.8799	0.879655	0.0777497	0.924293	0.106882
P50225	Sulfotransferase 1A1	SULT1A1	34.165	295	17.2816	17.2415	17.7699	17.4828	17.6094	17.3762	17.2924	18.1263	18.0042	17.6001	17.8946	17.9666	17.7302	18.4585	17.9697	17.295	17.9693	17.4985	18.201	17.54	17.7041	17.6343	17.7563	17.9449	18.4406	18.0043	17.7777	18.0312	17.9958	18.4193	17.7943	18.0679	18.1999	18.0478	18.4807	18.032	18.3685	17.6046	17.8061	17.9772	0.82707	0.0779497	0.818486	0.00551221
Q92820	Gamma-glutamyl hydrolase	GGH	35.964	318	18.3994	19.06	18.9062	17.7709	18.0815	18.5402	18.9273	18.264	17.9887	18.5917	17.9559	18.5482	17.871	18.2017	18.3188	17.9109	17.887	17.947	18.0741	18.7135	18.0729	18.7738	18.3581	18.5223	18.7239	18.5756	17.404	18.2707	18.5183	18.3394	18.2137	18.0574	18.1842	18.6303	17.4859	18.6074	18.4499	18.437	19.1169	17.4225	1.23986	0.0779699	0.992877	0.939041
Q9BUQ8	Probable ATP-dependent RNA helicase DDX23	DDX23	95.581	820	18.1326	18.3176	17.8767	18.051	18.1707	18.1593	18.3347	18.2693	18.0628	17.7854	17.7965	18.1861	17.9432	17.7513	18.1021	18.2786	17.8553	17.8734	17.6865	18.102	17.9958	17.9921	17.8952	17.8694	17.9362	18.2132	17.895	17.9182	17.8544	17.7999	18.2234	17.941	17.78	17.993	17.9421	18.0823	18.1363	17.8706	17.8671	17.8522	1.11615	0.077976	1.05986	0.122628
O75947	ATP synthase subunit d, mitochondrial	ATP5H	18.491	161	18.6917	18.6021	19.0002	18.6252	19.3347	18.8441	18.6116	18.6458	18.3497	18.7771	18.4196	18.7952	18.5566	18.4638	18.2753	18.6329	18.9365	18.611	18.4766	18.323	18.4509	18.5866	19.1282	18.5999	18.5745	18.629	19.7727	18.7892	18.5529	18.2529	18.5659	18.6058	18.58	18.4767	20.001	19.0537	18.7304	18.2781	18.5627	19.2216	1.14802	0.0780012	0.918911	0.302116
Q53GS7	Nucleoporin GLE1	GLE1	79.835	698	15.6955	16.0197	15.5149	15.7802	16.2505	16.2237	16.0992	15.9212	15.8684	16.0975	15.3935	15.5771	15.8813	15.2933	15.6878	16.2203	15.7619	16.0337	15.2214	15.9831	15.6468	15.463	15.3515	15.8103	15.4446	15.8357	15.6422	15.397	15.3995	15.1495	15.6643	15.9179	15.9755	15.5771	16.576	15.6141	15.5493	15.1306	15.9675	15.6515	1.18241	0.0780861	1.13919	0.0685621
O94875	Sorbin and SH3 domain-containing protein 2	SORBS2	124.11	1100	15.3826	15.5429	15.3483	15.3487	15.3741	15.1465	15.6615	15.5251	15.5018	16.4003	16.0855	15.8381	15.9377	15.4327	15.5808	15.4598	16.1995	15.4433	16.2574	15.7362	15.8448	15.9327	15.5275	16.345	16.4267	15.6968	15.772	15.581	15.9003	16.7949	16.1639	16.396	15.7987	15.9085	15.9818	16.1081	15.725	15.6673	15.7002	15.9164	0.827073	0.0781183	0.812685	0.0078518
Q13618	Cullin-3	CUL3	88.929	768	18.9661	18.8933	19.029	19.0759	18.7198	19.0864	18.8242	18.7876	18.8549	19.1667	18.7108	18.8371	19.018	18.5718	18.8284	19.0376	18.8795	18.7264	18.7525	18.8405	18.8371	18.976	19.0125	19.0864	18.8589	18.8295	19.2674	18.9593	18.8721	18.8069	18.8831	18.8921	18.913	18.8455	19.2747	18.7622	18.8726	19.0694	19.0047	18.9732	1.08684	0.0781283	0.952958	0.141618
P08842	Steryl-sulfatase	STS	65.492	583	16.3135	16.3575	16.8949	16.0312	16.6396	16.4118	16.2766	16.5369	16.6428	16.4843	16.8959	16.4825	16.6433	16.4348	16.372	16.5491	16.8226	16.6079	16.8515	16.6998	16.9555	16.872	17.0256	16.7726	17.0869	16.982	17.7252	16.8249	16.6793	17.0436	17.1472	16.8674	16.875	16.769	16.97	17.075	17.1324	16.9639	16.6766	17.2341	0.884533	0.0781392	0.738934	5.21721e-07
Q9NVR2	Integrator complex subunit 10	INTS10	82.235	710	13.6294	13.2327	14.6931	14.3068	14.2123	14.8358	13.7482	13.704	13.7831	13.6827	13.6834	13.3896	13.3066	13.8247	13.3827	13.9564	13.384	14.3175	13.1444	13.761	14.701	13.275	14.3719	13.5464	13.0409	13.2237	13.7296	14.0367	13.9212	14.158	13.4554	13.7705	13.381	13.8414	14.3745	13.1323	13.4052	13.3087	13.8348	13.6867	1.29038	0.0783511	1.06376	0.544585
P23921	Ribonucleoside-diphosphate reductase large subunit	RRM1	90.069	792	18.7964	18.1272	18.1802	18.6021	18.4947	18.7422	18.0242	18.6684	18.3283	17.975	17.6674	18.4191	18.0476	18.4191	18.16	18.5014	18.0862	18.2802	17.9411	18.0666	18.1541	18.2423	18.3336	18.1278	17.872	17.8741	18.1018	18.1656	18.2729	18.0767	17.9897	17.8854	18.3421	18.207	18.3838	17.781	17.866	18.1095	18.3953	17.8684	1.17691	0.0784849	1.12811	0.0358174
P50281	Matrix metalloproteinase-14	MMP14	65.893	582	18.0448	17.4987	17.3139	17.4014	17.0525	17.2055	18.2016	17.9639	17.2096	16.8939	17.0168	17.4385	17.1941	16.7264	17.2472	17.0193	17.1884	17.6314	17.2448	17.0873	17.351	17.365	17.0421	17.1194	17.0402	17.4823	17.0551	16.7827	16.9202	17.1897	17.2854	17.0565	17.5018	17.1293	16.6933	16.8253	17.5137	17.7711	17.1468	17.2079	1.23043	0.079357	1.11348	0.147105
Q96II8	Leucine-rich repeat and calponin homology domain-containing protein 3	LRCH3	86.082	777	13.0848	12.8243	13.198	13.202	13.4618	13.4429	13.3691	12.9772	13.2479	13.1402	13.1925	13.5332	13.2565	13.6357	13.9897	13.176	13.2535	13.1249	13.2737	13.4925	13.0523	13.0523	13.4696	13.3274	13.552	13.3426	13.3972	13.7028	13.6136	13.9307	13.0741	13.3931	13.5538	13.162	13.6635	13.4061	13.1483	13.9313	13.0882	13.2937	0.871755	0.0795708	0.924073	0.178449
Q08257	Quinone oxidoreductase	CRYZ	35.206	329	18.5105	18.5006	18.5975	18.1814	18.0575	18.4467	18.5978	18.5967	18.1895	19.3624	19.1793	18.4643	18.6657	18.224	19.4342	18.7302	18.8246	18.6766	19.44	18.5875	19.4718	18.7642	18.3658	18.9746	19.1385	18.9849	18.9428	19.0716	19.1999	18.6811	18.9726	18.9591	18.8398	18.8972	18.5407	19.0451	19.1015	18.843	18.8309	18.8077	0.801855	0.0796825	0.836078	0.0191557
Q08345	Epithelial discoidin domain-containing receptor 1	DDR1	101.13	913	16.0508	16.1938	15.5791	16.7404	16.275	16.4681	16.8075	15.9133	16.5396	15.2643	15.0999	16.2821	15.1349	15.9053	16.3278	16.5721	15.4937	16.11	15.1434	15.3645	15.6909	16.6808	15.4605	15.2555	15.4447	15.1983	15.1331	15.6466	15.32	15.2954	15.5259	15.0857	14.8512	15.5173	14.8956	15.155	15.4063	14.9489	15.5014	15.5103	1.35643	0.0796853	1.50222	0.000461494
P62861	40S ribosomal protein S30	FAU	14.39	133	17.8577	16.5285	16.6629	17.0985	15.2823	17.2318	16.3817	15.8904	15.8351	16.9487	16.3455	15.4791	15.568	15.1615	14.9505	16.7462	15.5494	16.697	15.5901	17.2658	16.0163	16.0665	15.8668	15.5518	15.4867	16.5914	15.5019	16.9332	16.957	16.5114	16.4625	16.0818	16.0926	16.5502	16.0348	16.0113	15.8817	15.5833	16.9267	15.5558	1.5545	0.0798722	1.08699	0.57456
P46781	40S ribosomal protein S9	RPS9	22.591	194	18.3723	18.6351	18.2776	18.4993	18.5796	18.6467	18.7061	18.5434	18.8577	18.2957	18.4556	18.8283	17.9529	17.8989	18.8594	18.2904	18.0982	18.4477	18.1554	18.1994	18.7636	18.2665	18.4354	18.3412	18.1622	18.8971	18.4893	18.0481	18.2529	17.6307	18.6269	18.1162	18.0023	18.5952	17.7773	18.293	18.4317	17.5983	18.5048	18.3638	1.16695	0.0799287	1.1097	0.143627
Q14249	Endonuclease G, mitochondrial	ENDOG	32.62	297	15.9147	16.9503	16.3314	16.5563	16.0115	16.123	15.8085	16.1366	15.8258	16.0242	15.9807	15.9605	15.8456	15.5695	15.8066	15.6942	16.1806	15.959	16.0616	16.2125	16.2628	16.1979	16.6618	16.4104	15.8037	16.4719	17.0644	16.3418	16.3816	16.7705	16.674	16.3677	16.2432	16.2004	17.4178	16.5197	16.453	16.5247	16.5352	16.3808	1.18194	0.0799679	0.738921	0.000125237
A0A075B6S5		IGKV1-27	12.711	117	14.6084	14.4152	15.1972	14.7746	14.9971	14.7592	14.652	14.3557	14.3021	15.1357	16.1873	14.8368	14.9932	15.466	14.8024	14.5412	15.1491	14.2054	15.5808	15.2187	14.9768	14.592	14.8742	15.4961	15.5889	15.0851	15.0217	15.3896	15.1544	15.7676	15.9085	15.0625	15.2133	15.232	15.5307	15.1231	14.681	15.3585	15.4904	14.9485	0.769301	0.0800556	0.803387	0.022487
Q96FV2	Secernin-2	SCRN2	46.596	425	15.9672	16.0419	15.831	15.9024	15.9235	15.804	15.6065	15.6884	16.2783	16.4093	16.3759	16.0651	15.9077	16.1485	16.1047	15.9395	16.1145	15.8225	16.7572	16.4066	15.8971	16.3404	15.7366	16.1834	16.3436	16.4452	16.0661	16.3586	16.3096	16.4418	15.9308	16.3627	16.0788	15.8263	16.107	16.2685	16.1211	16.5042	15.9932	16.1327	0.859197	0.0803525	0.921694	0.148214
O43395	U4/U6 small nuclear ribonucleoprotein Prp3	PRPF3	77.528	683	18.0309	18.0512	17.0916	17.7705	17.5716	18.0032	17.6713	17.7191	17.9613	17.106	17.0394	17.7251	17.3556	17.0332	17.482	17.9799	17.3748	17.6639	16.9953	17.5015	17.3063	17.3213	17.0659	17.0571	16.9783	17.2528	17.0674	17.2269	17.1973	17.123	17.4424	17.4362	17.8879	17.138	16.8102	17.2578	16.9945	17.3615	17.164	17.0161	1.2164	0.0805022	1.27555	0.000749894
Q96C90	Protein phosphatase 1 regulatory subunit 14B	PPP1R14B	15.911	147	18.1028	17.9688	17.0569	18.5071	18.2447	17.938	18.0047	18.2372	16.6357	17.041	16.9667	17.9953	17.2052	16.8212	16.7462	17.9288	17.4492	18.0115	16.9812	16.902	16.8118	17.7039	17.3778	17.1414	16.8675	16.8258	17.2725	17.7047	17.9203	17.0063	16.9406	17.2145	17.0728	17.3933	17.6328	17.0092	16.8333	17.1378	17.5229	16.6682	1.38796	0.0805143	1.2608	0.0397364
Q9UPM8	AP-4 complex subunit epsilon-1	AP4E1	127.29	1137	13.4174	13.3837	14.0339	13.5477	13.2897	13.8006	13.6598	13.6511	14.1339	13.6797	13.529	13.9345	13.7483	14.6254	13.5039	14.5217	14.6844	13.8006	13.5618	13.8285	13.2563	13.632	14.4939	13.5211	13.5515	13.419	13.6958	13.6958	13.6171	14.2948	13.3748	13.6585	13.9702	13.5479	14.9398	13.855	13.6573	13.2748	13.2748	14.4451	0.80437	0.0806504	1.04103	0.672021
Q5VST9	Obscurin	OBSCN	868.47	7968	18.5468	18.226	18.7452	18.5061	18.5644	18.6723	18.4303	18.4368	18.7059	18.5121	18.7764	18.5699	18.6532	18.9982	18.6853	18.461	20.2242	18.5881	18.8189	18.6698	18.6196	18.6408	18.9386	18.4251	18.6111	18.6777	19.9084	18.9105	18.8289	18.8384	18.3137	18.6806	18.8996	18.4508	20.6833	18.3488	18.5556	19.0332	18.5385	19.8003	0.80669	0.0807012	0.873207	0.228059
P08697	Alpha-2-antiplasmin	SERPINF2	54.565	491	17.8743	17.7534	18.8638	17.9533	17.7353	17.8609	18.0156	17.9785	18.2369	18.4828	18.1563	18.4194	18.407	19.7462	18.5249	17.8515	18.7462	18.1976	18.3972	18.0166	18.684	18.265	18.3895	18.8462	18.5964	18.5661	18.3989	18.7161	18.9321	18.6402	18.2821	18.5046	18.5783	18.593	18.4837	18.54	18.4039	18.9982	18.5928	18.3239	0.773348	0.0810468	0.808954	0.0117989
Q9BUB7	Transmembrane protein 70, mitochondrial	TMEM70	28.969	260	14.4411	14.1363	14.304	13.9577	14.2291	14.466	14.5597	13.9838	14.685	14.3493	14.3888	14.5616	14.1073	13.3794	14.1749	13.7573	14.0341	13.9601	14.3427	13.9902	14.4338	13.8341	14.1044	14.3246	14.2234	14.9781	14.6668	13.957	13.8568	13.5214	14.4784	14.326	14.5522	14.5844	14.2914	14.3594	14.6225	14.5073	13.9908	14.1538	1.18226	0.0811183	0.934385	0.349845
Q01518	Adenylyl cyclase-associated protein 1	CAP1	51.901	475	20.8084	20.5537	20.8878	20.9145	21.1544	21.0137	20.8955	21.0368	20.5753	20.567	20.3884	20.6911	20.9441	21.0394	20.6532	20.444	20.5659	20.8833	20.3661	20.5828	20.5064	20.6456	20.9225	20.3297	20.374	20.6704	20.0532	20.579	20.5378	20.4328	20.667	20.4801	20.8497	20.4457	19.7683	20.5109	20.9041	20.1595	20.444	20.0982	1.13672	0.0814921	1.21362	0.00193892
P42574	Caspase-3	CASP3	31.608	277	15.8121	16.1018	15.9864	15.7311	15.9428	15.8746	15.6687	15.7189	15.4398	15.2876	15.387	15.2509	15.6479	15.5773	14.8402	16.2054	15.4125	15.5697	15.0372	15.9034	15.526	15.2084	15.6434	15.576	15.7048	15.3502	15.065	15.7346	15.893	15.6271	15.9394	15.6571	15.7298	15.6173	15.3214	15.5076	14.9535	15.3901	15.6889	15.2131	1.20852	0.081694	1.07358	0.304504
Q9Y295	Developmentally-regulated GTP-binding protein 1	DRG1	40.542	367	17.9079	17.8827	17.9342	18.2403	17.9593	18.1233	18.0533	18.1451	18.4259	17.9588	17.9739	17.621	17.8219	17.6818	17.955	18.2795	17.7455	18.3396	17.664	17.766	17.7797	18	17.9739	17.6797	17.718	17.6839	17.6591	17.769	17.769	17.5326	17.6834	17.9854	18.071	18.0386	17.6983	17.7476	17.6528	17.4424	17.8872	17.7675	1.13151	0.0817058	1.1463	0.0036648
Q8TEX9	Importin-4	IPO4	118.71	1081	18.012	17.9875	17.6935	17.71	18.0632	17.8038	17.9009	17.5275	17.6398	17.4062	17.5787	17.6117	17.6198	17.8426	17.8147	17.5062	17.5724	17.6484	17.54	17.5829	17.6062	17.5423	17.6209	17.6739	17.5294	17.6438	17.3565	17.5111	17.6167	17.7539	17.4704	17.6174	17.7139	17.7118	17.6912	17.4107	17.6773	17.9801	17.7953	17.678	1.10397	0.0817574	1.05194	0.164926
Q99549	M-phase phosphoprotein 8	MPHOSPH8	97.181	860	16.378	16.3193	15.5074	15.87	15.8982	16.266	15.8502	16.0582	15.6905	15.9023	15.5638	15.8764	16.0241	15.3971	15.5589	16.097	15.4895	15.7289	15.435	16.2007	15.5877	15.7601	15.3926	15.642	15.6624	15.8509	15.6459	15.9584	15.9623	15.67	16.0054	15.8049	15.6076	15.684	15.227	15.6165	15.3654	16.2442	16.0555	15.3979	1.17843	0.0818143	1.10845	0.103483
Q86UX7	Fermitin family homolog 3	FERMT3	75.952	667	17.9892	18.0192	18.2586	17.9952	18.3097	17.9316	18.1987	18.1112	18.0706	17.8075	18.2032	18.3196	18.2861	19.0303	18.3712	18.0388	18.3177	18.0601	17.896	18.168	18.3783	18.1946	18.1526	18.2277	18.0053	18.6604	17.8218	18.4441	18.1784	18.4914	18.1507	18.2964	18.4768	18.3567	17.8396	18.2535	18.7655	18.1497	18.2829	18.4032	0.870585	0.0818837	0.928282	0.178482
Q9BXM0	Periaxin	PRX	154.9	1461	16.6519	16.7115	17.3741	17.3876	17.1919	17.0378	16.8932	16.8412	16.8833	17.5999	18.3308	17.188	16.9455	17.9273	17.121	17.3876	16.9678	16.9519	17.7975	17.2865	17.5662	18.1809	17.6295	18.9796	17.9288	17.3677	17.6294	17.8346	19.0965	17.8649	17.5063	17.7457	17.0982	18.3854	18.0518	17.1776	17.3668	17.4413	17.8804	17.464	0.793807	0.081915	0.666202	0.000451529
P17677	Neuromodulin	GAP43	24.802	238	14.669	14.5713	14.6016	14.4222	14.9275	14.895	14.3598	14.9029	15.2799	15.4481	14.7337	14.8813	15.5997	15.5875	15.6483	14.6296	14.562	14.818	15.5888	15.386	14.5755	15.9977	14.9187	15.1316	15.8276	14.5498	14.384	15.1641	15.7861	15.5695	14.8334	14.9267	15.0019	14.7946	14.685	15.2085	14.501	15.224	14.6275	13.8691	0.792369	0.0821377	0.99778	0.983408
P41227	N-alpha-acetyltransferase 10	NAA10	26.458	235	16.3823	16.2984	15.7794	16.0121	16.0374	16.0972	16.0597	15.8981	16.2411	15.9252	15.7712	16.3561	15.8185	15.523	16.2023	15.8099	15.6709	15.9725	15.688	16.0589	16.1619	15.9719	15.8185	16.0985	16.0512	16.032	15.9803	15.6982	15.7801	15.3863	16.0118	15.7378	15.6962	16.0023	15.4811	15.8073	15.5135	16.2795	16.3491	16.0659	1.13755	0.0822075	1.05991	0.294916
Q13884	Beta-1-syntrophin	SNTB1	58.06	538	17.1008	16.863	17.4006	17.1944	17.3832	16.9132	17.2992	17.0524	17.2391	17.8955	17.6332	17.5186	17.4369	17.2249	17.3122	17.2045	18.7468	17.1852	18.1071	17.335	17.4823	17.495	17.8689	17.7109	17.7894	17.3512	18.5203	17.3001	17.5102	17.5817	17.2927	17.7994	17.9328	17.3364	18.8295	17.4572	17.349	17.2302	17.3605	17.9411	0.792076	0.0822486	0.838185	0.0660128
Q9Y383	Putative RNA-binding protein Luc7-like 2	LUC7L2	46.513	392	17.9832	17.8488	17.8523	17.7544	17.8638	18.1361	18.204	17.8122	17.6182	17.4383	17.3527	17.8744	17.7985	17.6448	17.8962	18.0123	17.4452	17.7513	17.2665	17.4972	17.3647	17.6427	18.0257	17.3465	17.3788	17.6806	17.3568	17.4401	17.7198	16.8058	17.4895	17.2883	17.401	17.4367	17.2135	17.5438	17.5519	16.9164	17.5868	17.3347	1.1465	0.0823044	1.2538	0.000318402
Q13576	Ras GTPase-activating-like protein IQGAP2	IQGAP2	180.58	1575	19.15	19.26	19.8798	19.3134	19.817	19.2659	19.2265	19.2009	19.6937	20.5786	20.3494	19.7158	19.7499	19.8581	19.896	19.3444	19.7809	19.442	20.4978	20.1512	19.8239	19.979	19.9405	19.8591	20.1965	20.1965	19.658	19.7997	19.9963	20.0725	19.7735	20.0522	20.3943	19.7373	19.7677	20.1733	20.4277	19.8784	19.4713	19.7641	0.790064	0.0823632	0.847032	0.0393596
Q15274	Nicotinate-nucleotide pyrophosphorylase [carboxylating]	QPRT	30.845	297	14.8838	14.5747	14.8044	14.6674	14.9841	14.6616	14.7516	14.6085	14.448	15.389	15.2279	15.0164	15.046	14.8901	15.3321	14.7706	14.6934	14.4883	15.3526	15.2563	15.5106	14.8854	14.7518	15.1216	15.306	15.4492	14.6212	15.2049	14.9718	15.3734	15.2687	15.6657	14.7871	15.0488	14.2342	15.4545	15.2864	15.2435	14.8312	14.5363	0.852602	0.0823999	0.879494	0.0883975
Q9UI26	Importin-11	IPO11	112.53	975	17.4952	17.1634	17.609	17.2763	17.2157	17.3529	17.2349	17.3	17.3087	17.5124	17.4976	17.6808	17.5582	17.179	17.545	17.2412	17.5558	17.3608	17.7351	17.4508	17.5725	17.59	17.6985	18.0492	17.9286	17.446	17.4893	17.8352	17.8045	17.9951	17.5034	17.8865	17.9822	17.6196	17.2013	17.5706	17.386	17.8518	17.9144	17.6541	0.911567	0.0824223	0.820572	8.08212e-05
Q15653	NF-kappa-B inhibitor beta	NFKBIB	37.771	356	14.54	14.6637	14.4199	14.8078	14.317	14.4495	13.881	13.8842	14.515	14.2873	13.8898	14.0114	14.223	14.4073	13.6037	14.6865	13.9417	14.4816	13.6963	14.1487	14.2067	14.1503	14.3769	13.8083	14.02	14.2544	14.5454	14.313	14.3031	14.4704	14.4874	14.054	13.6579	14.4404	13.6192	14.2289	13.8608	14.5429	14.1678	14.5401	1.20376	0.0827076	1.02838	0.69045
Q14978	Nucleolar and coiled-body phosphoprotein 1	NOLC1	73.602	699	18.4463	17.728	17.1002	17.5583	17.4532	18.0778	17.4706	17.4039	18.0233	16.8966	16.763	17.6528	17.2964	16.9648	17.3775	17.9898	17.2874	17.3431	16.7934	17.2129	16.81	17.2008	17.1851	17.0329	16.9816	17.1417	16.8109	17.0395	17.1377	16.3283	17.1686	17.3195	16.8188	16.8204	16.8006	17.2493	16.7216	16.327	17.2279	16.689	1.27253	0.0827544	1.41559	0.000147812
Q86TD4	Sarcalumenin	SRL	54.43	473	17.4907	17.5453	17.5059	17.2231	16.989	16.9013	17.313	17.4045	17.3338	18.013	18.2464	17.8121	17.4958	17.6154	17.4247	17.4917	19.0132	17.2261	17.3876	17.577	17.4939	17.4798	18.0762	17.1171	17.3442	17.0628	19.364	18.3743	18.4096	18.3096	17.5662	18.1599	17.4173	17.6944	20.6455	17.0408	16.9595	17.1135	17.4054	19.0587	0.780758	0.0828525	0.782315	0.136962
O95810	Serum deprivation-response protein	SDPR	47.173	425	16.951	17.1564	17.2487	17.2315	17.3947	17.0991	16.7012	16.8224	17.194	17.4436	17.5824	17.0553	17.2372	17.8828	17.208	17.2225	17.3757	16.9455	17.7041	17.2255	17.7188	17.5364	17.2278	18.1296	17.7909	17.1662	18.0102	17.6551	17.8166	18.0465	18.0056	17.6464	17.0682	18.2117	17.3812	17.3994	16.9511	17.9981	17.876	17.6411	0.858794	0.0828968	0.742382	0.000186217
Q01581	Hydroxymethylglutaryl-CoA synthase, cytoplasmic	HMGCS1	57.293	520	16.6682	16.8066	16.2717	16.9652	17.0759	17.1261	16.7797	17.3215	17.1346	16.0828	16.8724	16.9646	16.5927	16.4292	16.5339	16.4055	16.244	16.3472	16.7063	16.4862	17.5467	16.8576	16.4722	17.0414	16.6296	16.4802	16.3526	17.1351	17.2921	16.6723	16.7513	16.6571	16.6189	17.2349	16.204	16.5071	16.3968	16.8941	17.5588	16.1626	1.20167	0.082934	0.944377	0.495947
P52565	Rho GDP-dissociation inhibitor 1	ARHGDIA	23.207	204	18.878	18.994	19.3283	18.7592	19.2664	18.6353	19.2691	19.0155	18.9819	19.1653	19.0823	19.3062	19.1966	19.3034	19.4572	19.0306	18.9389	19.3386	19.1167	19.1456	19.0172	18.971	19.3415	19.2098	19.4196	19.262	18.4616	19.064	19.1715	18.8524	19.0725	19.1919	19.0007	19.172	18.6014	19.2082	19.1147	18.6988	19.2798	18.5497	0.893581	0.0829479	1.05515	0.317758
P05452	Tetranectin	CLEC3B	22.537	202	15.7033	15.5526	16.1642	15.4592	15.2559	15.5518	16.3125	16.0099	15.3034	16.5637	17.1163	16.2131	16.3788	15.6489	15.7319	15.5518	16.6805	15.9272	17.2098	15.7928	16.3832	16.437	15.9838	16.9986	17.1676	16.2409	16.0547	16.5483	16.9995	17.131	16.2749	16.5297	16.4186	16.895	16.1857	16.5646	16.3202	16.2731	16.4443	16.3619	0.738442	0.0829977	0.705031	0.00161913
O00487	26S proteasome non-ATPase regulatory subunit 14	PSMD14	34.577	310	16.4924	16.6588	16.2229	16.4211	16.17	16.4441	16.1135	16.0499	16.0118	16.2346	16.0603	16.1282	16.2722	15.8728	16.2102	16.2655	16.0414	16.1875	16.0386	16.2875	16.0842	16.0852	16.1699	16.2053	16.2074	16.427	16.036	16.4044	16.3827	16.229	16.2142	16.1553	16.1089	16.2879	16.0717	16.2443	16.2009	15.9513	16.2827	16.1759	1.1061	0.0830122	1.00902	0.797791
P00746	Complement factor D	CFD	27.033	253	16.8539	17.0021	17.9715	17.2013	17.0709	17.012	17.1688	17.1874	17.0183	17.6943	18.2991	17.3959	17.8673	17.3726	17.1732	17.0506	17.3975	17.1718	18.4925	17.4463	17.5288	17.906	17.7251	18.2334	18.143	17.1563	17.8428	18.2824	18.2519	17.9066	17.4333	17.8656	17.3612	18.2381	18.0356	17.8465	17.2504	17.963	18.171	17.6943	0.785336	0.0832588	0.732346	0.00109329
Q8WUP2	Filamin-binding LIM protein 1	FBLIM1	40.669	373	15.2242	14.7864	14.4879	15.0732	14.2417	14.5016	15.3093	14.8573	14.5176	14.1686	14.0257	14.0862	14.6977	15.1811	14.5868	14.0492	14.2904	14.6761	14.3313	14.0517	14.2365	14.0862	14.0002	14.3268	14.2213	14.3937	13.8771	13.6871	13.9405	14.28	14.107	13.8284	14.2365	13.9109	14.0888	14.0459	14.3579	15.0534	14.2743	14.0341	1.24761	0.0836865	1.32672	0.000830218
P00450	Ceruloplasmin	CP	122.2	1065	20.7576	20.3582	21.9481	21.0515	21.0098	20.706	20.8967	20.756	20.7259	21.4531	21.2932	21.0966	21.5396	22.1114	21.2359	20.6988	21.523	20.8877	21.3642	21.3347	21.7945	21.3606	21.8801	22.2658	21.8105	21.2291	21.3347	22.003	21.7675	21.8858	21.5586	21.6835	21.2932	21.8585	20.7973	21.8319	21.77	22.0503	21.6624	21.4802	0.788842	0.0837778	0.693284	0.000137559
Q8WZ42	Titin	TTN	3816	34350	23.4208	23.7655	23.9827	23.5203	23.8841	23.587	23.5605	24.3252	24.829	23.7472	24.2303	24.655	24.2303	23.5472	24.655	23.6686	25.3606	23.587	24.4795	24.3252	24.2303	23.1299	24.655	23.6686	23.6686	24.2637	24.829	24.3252	23.9601	23.9601	24.655	24.655	23.9827	24.2303	24.655	23.6686	24.4795	24.0744	23.6686	24.829	0.751759	0.0837778	0.92571	0.486923
P22626	Heterogeneous nuclear ribonucleoproteins A2/B1	HNRNPA2B1	37.429	353	21.2657	21.2494	20.5376	20.7391	20.6839	21.3144	21.2852	21.2678	21.2852	20.8545	20.5506	21.226	20.9226	20.1497	21.0176	21.2714	20.4675	20.8232	20.1694	20.9534	20.761	20.7433	20.5455	20.5315	20.5696	21.3273	20.1343	20.5229	20.5614	20.301	21.5055	20.612	20.3744	20.7788	19.6437	21.5345	20.8232	19.7998	20.5451	20.2037	1.22533	0.0838075	1.24038	0.0295272
Q8NHP6	Motile sperm domain-containing protein 2	MOSPD2	59.745	518	16.9862	16.9153	16.6805	16.8235	16.9327	17.0115	16.817	16.999	16.8646	16.2737	16.4925	16.7451	16.5063	17.0538	16.7046	16.7086	16.786	16.6673	16.2969	16.6119	16.6557	16.5647	16.6905	16.4136	16.3824	16.5673	16.3643	16.4873	16.599	16.6693	16.5235	16.44	16.9506	16.4185	16.2597	16.4393	16.6152	16.4248	16.5196	16.5337	1.12749	0.0838364	1.16303	0.000883284
P35542	Serum amyloid A-4 protein	SAA4	14.746	130	17.9604	17.4646	18.3662	17.8569	17.7938	17.5851	17.4958	17.5508	17.9495	17.9897	18.1521	18.1949	17.7749	18.7185	18.2449	17.5116	18.1091	17.7172	18.3901	17.8401	18.8734	18.1509	18.371	18.5722	18.6129	18.1847	18.0895	18.5812	18.2559	18.4241	17.9141	18.0168	18.1677	18.1937	17.8862	18.1363	18.3252	18.9122	18.2934	18.0752	0.832725	0.0839009	0.774579	0.000697644
Q14315	Filamin-C	FLNC	291.02	2725	20.5453	20.1646	20.845	20.6407	20.4689	20.2553	20.5277	20.5631	20.7965	20.59	21.0288	20.8019	20.6248	20.706	20.8019	20.5843	22.9456	20.4304	20.7297	21.0797	20.9902	20.9363	21.0647	21.1601	21.8258	20.7079	22.3989	21.3365	21.0186	21.1873	21.0034	21.1955	21.038	20.7944	23.1066	20.3757	20.682	20.7934	20.6682	22.2576	0.740418	0.0840925	0.721698	0.0214624
Q9Y679	Ancient ubiquitous protein 1	AUP1	45.786	410	16.4731	16.2434	15.8497	16.2397	16.2279	16.3539	16.2711	16.4127	16.341	15.9414	15.8296	16.0848	15.9639	16.2816	16.1196	16.2397	16.1587	16.1992	16.0736	16.0207	16.0468	16.0148	15.8869	16.0686	16.0873	15.667	15.8654	15.9783	15.9881	16.1938	15.9524	16.3673	16.3298	15.9849	15.5686	15.9505	16.0602	15.7193	15.8898	15.8798	1.10056	0.084153	1.14178	0.00258321
P52564	Dual specificity mitogen-activated protein kinase kinase 6	MAP2K6	37.492	334	15.5353	16.1326	16.739	15.8079	16.1293	16.259	16.0025	16.3046	16.2107	16.6717	16.5191	16.3883	16.7049	15.8447	16.463	16.9224	16.3406	16.1697	16.4885	16.6514	16.6112	16.2246	16.448	16.5461	16.5832	16.8071	16.7586	16.4053	16.3757	16.3512	16.6658	16.8472	16.5041	16.7166	16.5902	16.5998	16.5959	16.3901	16.5555	16.8793	0.829318	0.0841543	0.835939	0.00535967
O43570	Carbonic anhydrase 12	CA12	39.45	354	15.2111	15.6055	15.1297	15.4788	15.5379	15.3093	15.184	15.9304	15.6646	15.299	15.3243	15.0259	14.9701	15.59	15.1976	15.1964	15.2829	15.4492	15.2846	15.2252	15.7132	15.6136	14.9073	15.7582	15.5556	15.7903	15.6348	15.6473	15.4276	15.6	15.4798	15.4533	15.4732	15.9602	15.7761	15.4465	15.8223	15.125	15.8897	15.7312	1.13322	0.0843685	0.843566	0.00280219
Q9H0E2	Toll-interacting protein	TOLLIP	30.281	274	16.9212	16.7137	16.9434	16.8265	16.7425	16.5692	16.5481	16.7458	16.2124	17.2536	16.904	16.785	17.0354	16.8975	16.7843	16.977	17.1121	16.6956	17.3981	16.8663	18.0153	17.2763	16.8926	17.3753	17.0656	16.9508	17.2028	17.4963	17.5247	17.587	16.8784	17.2161	17.1785	17.2049	16.9569	17.0296	17.09	17.3668	17.3892	17.3946	0.871832	0.0843838	0.753662	2.28903e-05
Q9GZT9	Egl nine homolog 1	EGLN1	46.02	426	16.808	17.0697	16.5153	16.8513	16.6116	17.254	16.8841	15.9792	17.2021	16.4732	16.0599	16.5876	16.5528	16.2546	16.409	16.9506	16.4822	16.9247	16.4538	16.1918	16.4991	16.4574	16.6855	16.3119	16.3353	16.322	17.1673	16.4913	16.3835	16.4133	16.4693	16.3	15.9799	16.6625	17.3212	16.3111	16.0925	16.0833	16.8179	16.7126	1.21263	0.0843906	1.09805	0.227699
Q9Y262	Eukaryotic translation initiation factor 3 subunit L	EIF3L	66.726	564	18.5065	18.4658	18.6041	18.7469	18.7884	18.7158	18.5374	18.437	18.787	18.6107	18.6097	18.6293	18.4849	18.3001	18.5496	18.4819	18.5295	18.6687	18.5392	18.4192	18.5184	18.4557	18.7355	18.4558	18.3426	18.6911	18.4509	18.4361	18.4234	18.404	18.6123	18.5615	18.8158	18.6058	18.3799	18.3227	18.5583	18.574	18.4741	18.4915	1.07086	0.084564	1.03895	0.184785
Q8IZ83	Aldehyde dehydrogenase family 16 member A1	ALDH16A1	85.126	802	17.6317	17.6828	17.8581	17.5066	17.97	17.8682	17.541	17.6633	17.6768	17.6449	17.7605	17.8169	17.6654	18.3224	18.0182	17.9519	17.6288	18.0532	17.5639	17.8413	17.6151	17.7815	17.9713	17.6383	17.6713	17.8511	17.5658	17.8345	17.8661	18.2654	17.5875	17.6579	17.7305	17.6084	17.6061	17.6299	17.7938	17.4311	17.6822	17.6164	0.896319	0.0846932	1.0447	0.307736
P20936	Ras GTPase-activating protein 1	RASA1	116.4	1047	12.168	11.7088	12.14	12.0821	12.0203	12.0821	12.0992	11.7874	12.8084	12.2774	12.2579	11.989	12.1871	12.7663	12.4734	12.4881	12.1901	12.1596	12.3429	12.4583	12.0418	12.1183	12.1491	11.95	12.3123	11.9303	12.1888	12.0331	12.1888	12.1888	11.9445	12.2455	12.8761	12.2183	12.2378	12.0616	11.9052	12.54	12.3123	12.6541	0.862191	0.0847418	1.0136	0.816463
P23284	Peptidyl-prolyl cis-trans isomerase B	PPIB	23.742	216	20.2697	19.3072	19.9944	19.8369	19.6564	19.7979	20.0344	19.7749	19.2322	19.8771	19.7556	19.3793	19.5081	18.7775	18.8278	19.8178	19.667	19.6594	19.4787	19.9733	19.3521	19.5244	19.625	19.0495	19.4961	19.6192	18.8926	19.1697	19.2612	19.1799	19.3865	19.6948	19.6221	19.0823	19.0596	19.6706	19.289	18.5473	18.93	18.9231	1.22575	0.0847745	1.28568	0.00226641
Q86XA9	HEAT repeat-containing protein 5A	HEATR5A	222	2040	15.4894	15.8582	15.9013	15.6025	15.3759	15.6425	15.8549	15.802	15.5166	15.7204	15.8293	15.6349	15.7823	16.2427	15.8008	15.7763	15.7594	15.6916	15.8875	15.7637	15.6192	16.0655	15.8867	15.733	15.6545	15.7308	16.0711	15.6681	15.6257	16.0971	15.6741	15.7591	15.8304	15.6977	15.8317	15.8465	15.8567	16.138	15.7014	15.9649	0.90722	0.0851574	0.948674	0.177054
Q8N335	Glycerol-3-phosphate dehydrogenase 1-like protein	GPD1L	38.418	351	17.6007	17.7869	18.2438	17.6716	18.0493	18.0472	18.2192	18.3092	17.8723	18.4739	18.7879	17.9816	18.2289	18.0825	18.2465	18.3266	18.4044	17.7386	18.7214	18.2238	18.3692	18.4282	18.2775	18.6034	18.7197	18.2625	18.7688	18.2714	18.2931	18.3036	18.4762	18.5015	18.0652	18.4582	18.6492	18.6124	18.3621	18.4091	18.4378	18.9988	0.842761	0.085171	0.805203	0.000849826
Q8WWQ0	PH-interacting protein	PHIP	206.69	1821	16.1466	16.4058	15.8844	16.8714	17.3863	16.6834	16.2169	16.3231	15.9614	16.2501	16.3515	15.9152	16.1492	15.9002	16.0481	16.3432	16.0982	16.6823	15.4647	15.9501	15.9803	16.1917	15.9256	15.4419	15.4536	15.7925	16.2803	16.4334	16.3941	15.7543	16.0122	16.2283	16.0443	15.8684	17.2559	15.326	15.8825	15.5338	15.5887	16.0887	1.25064	0.0851735	1.21233	0.0479504
P40227	T-complex protein 1 subunit zeta	CCT6A	58.024	531	19.625	19.5426	19.2257	19.7717	19.402	19.3755	19.1927	19.4717	19.445	19.0008	19.116	19.5426	19.1506	19.1531	19.2209	19.402	19.1596	19.436	19.0045	19.2629	19.3185	19.1688	19.1456	19.0643	19.0027	19.1019	18.7234	19.2509	19.2038	19.3243	19.2231	19.155	19.2786	19.1232	18.8062	18.9815	19.2794	19.1952	19.1574	18.9607	1.11764	0.0853513	1.15014	0.00150845
Q8IWV7	E3 ubiquitin-protein ligase UBR1	UBR1	200.21	1749	16.5858	16.527	17.0948	16.4542	16.8766	16.6508	16.992	16.9318	16.8062	17.347	17.4241	17.3614	16.8854	16.801	17.3096	16.5704	17.2497	16.7867	17.2925	16.9384	17.151	17.0061	17.2191	17.0992	17.2798	17.2686	17.2481	17.8668	17.2211	16.9035	17.1943	17.1284	17.191	17.0286	17.6332	17.0656	17.4491	17.2182	16.8608	17.27	0.849508	0.0853887	0.828819	0.00310892
P83111	Serine beta-lactamase-like protein LACTB, mitochondrial	LACTB	60.693	547	17.6462	18.3832	18.1623	17.6574	17.9887	18.2313	18.4863	18.4135	17.9059	18.0772	18.4565	18.0915	18.1381	18.7909	18.236	17.8428	18.8416	18.5765	18.2313	18.2505	18.6907	18.3079	18.1391	18.3968	18.422	18.6566	19.3142	18.466	18.427	18.5135	18.6038	18.4892	18.8739	18.4552	18.9908	18.9063	19.2506	18.3615	18.2657	18.8211	0.84068	0.0856116	0.759327	0.00038729
P02679	Fibrinogen gamma chain	FGG	51.511	453	22.3113	21.3035	24.0605	21.7752	21.5443	22.142	21.7838	21.6323	22.4925	22.0396	22.3457	22.8777	22.3113	23.8334	22.9504	21.6867	23.7208	22.7495	22.2921	22.2313	23.3181	22.0119	23.6343	24.1399	22.6611	22.3924	22.5309	23.0956	22.5309	23.5095	22.2366	22.7165	22.4639	22.6177	21.9583	22.1992	22.5786	22.3588	23.039	23.3568	0.663697	0.08579	0.777374	0.100558
P78324	Tyrosine-protein phosphatase non-receptor type substrate 1	SIRPA	54.966	504	16.7112	16.6575	17.282	16.6786	16.9952	16.6334	16.4534	16.9832	16.839	16.7957	16.9108	16.8461	17.0469	17.7493	17.4166	16.6793	17.3516	16.5998	16.8153	17.088	16.7971	16.7818	17.1968	16.7744	16.5184	16.805	16.7881	16.9619	16.9153	17.3882	16.7494	16.7472	17.0636	16.8222	16.6502	16.7725	17.3708	16.7549	17.0771	16.9274	0.842385	0.0858237	1.02351	0.705418
P29034	Protein S100-A2	S100A2	11.117	98	20.9415	20.8769	19.4256	21.1349	20.3573	21.4696	20.6905	20.2369	20.3229	18.4712	18.8608	20.6619	19.4164	19.4821	20.682	20.397	19.3961	20.3734	18.9407	19.2104	19.4195	19.7607	19.5152	19.337	18.7202	19.0551	18.8792	19.7057	19.4586	19.2249	19.0326	18.9443	19.248	19.0527	19.2189	18.5368	19.1411	19.4472	19.5417	19.084	1.56985	0.085965	1.80404	0.000152636
Q06830	Peroxiredoxin-1	PRDX1	22.11	199	20.6154	21.2832	20.855	20.6606	20.705	21.163	20.7064	20.25	20.283	20.4392	20.3523	20.4896	20.5841	20.0399	20.321	20.8893	20.1987	20.2372	20.2995	20.9606	20.3897	20.5311	20.7374	20.3673	20.5003	20.3822	20.174	20.3888	20.6383	20.5117	20.5165	20.2474	20.3428	20.6216	20.2288	20.5615	20.304	20.4341	20.6268	20.2869	1.19653	0.086076	1.0921	0.133751
Q92621	Nuclear pore complex protein Nup205	NUP205	227.92	2012	18.269	18.3437	18.1061	18.3515	18.3774	18.546	18.3117	18.2499	18.5029	18.1396	18.1485	18.2243	18.0949	17.9214	18.2353	18.4958	18.222	18.2982	18.0326	18.3067	18.2459	18.3221	18.1692	18.1525	18.1108	18.2331	18.0599	18.3518	18.1718	18.2097	18.2527	18.131	18.1754	18.2349	18.7704	18.091	18.2283	18.1072	18.1455	18.1378	1.0881	0.0862411	1.03084	0.376389
Q9BQA1	Methylosome protein 50	WDR77	36.724	342	16.0279	16.5091	16.0979	16.1247	16.0505	16.3423	16.1647	16.0056	15.7223	16.264	16.4449	16.2795	16.2264	16.3255	16.3138	16.3531	16.1006	16.2812	16.4508	15.9985	16.4362	16.1785	16.2752	16.1811	16.3587	16.216	16.0699	16.22	16.0741	16.1051	16.298	16.284	16.2131	16.2735	15.899	16.3904	16.1701	16.2578	16.4707	16.2653	0.903436	0.0862741	0.980999	0.59886
Q9Y333	U6 snRNA-associated Sm-like protein LSm2	LSM2	10.834	95	17.2238	17.0099	17.5517	17.3189	17.7801	17.4403	17.6237	17.3113	17.0342	17.0709	17.2026	17.1034	17.1848	16.8718	17.1034	17.534	16.9638	17.1041	17.2394	17.2391	17.1654	17.0812	17.4852	17.144	17.1946	17.3019	16.9414	17.3843	17.3003	17.0224	17.376	17.2171	17.6312	17.6106	16.9872	17.0078	17.1659	17.3855	17.0662	16.5972	1.13432	0.086395	1.02976	0.58206
P17096	High mobility group protein HMG-I/HMG-Y	HMGA1	11.676	107	18.23	18.9925	18.1067	19.2193	18.357	18.9974	18.9355	18.2144	19.3713	17.7254	17.3021	18.7959	17.5874	17.2941	18.7496	19.5846	17.7116	18.0932	17.4479	18.1796	17.723	17.5148	18.7102	17.2011	17.1301	17.5622	17.3529	17.7006	17.4991	16.9193	17.9618	17.3311	17.4517	17.4153	17.1288	17.2499	16.9706	17.1207	17.8949	17.1886	1.45434	0.0864325	1.8576	1.85804e-05
Q6P1N0	Coiled-coil and C2 domain-containing protein 1A	CC2D1A	104.06	951	17.5324	17.5078	17.3674	17.4674	17.5319	17.6262	17.2724	17.5653	17.6347	17.6269	17.6264	17.4492	17.5163	18.0748	17.479	17.5221	17.5366	17.6637	17.8427	17.7262	17.5938	17.5882	17.4069	17.4432	17.2992	17.3902	17.3596	17.5945	17.6311	17.5262	17.5664	17.5802	17.3264	17.6514	17.012	17.2507	17.463	17.6914	17.7087	17.2672	0.913549	0.0864503	1.07995	0.0514379
O94952	F-box only protein 21	FBXO21	72.269	628	16.6557	17.3306	16.297	17.2022	17.1669	16.9177	16.0871	16.547	16.8312	16.7286	16.7386	16.2101	16.5692	16.1174	16.4045	16.8723	16.7233	16.4963	15.8433	16.8015	16.9012	16.5497	16.0557	15.9629	15.9183	16.0939	16.5248	16.476	16.4252	17.1226	16.9098	16.4045	16.3968	16.7442	16.4784	15.9211	15.9544	16.0304	16.1554	16.5783	1.23009	0.0866181	1.18661	0.0448027
Q9Y2X3	Nucleolar protein 58	NOP58	59.578	529	18.2474	18.7132	18.319	18.1495	18.1435	18.6366	18.4886	18.6282	18.2498	18.3932	18.1351	18.319	18.3306	18.4718	18.306	18.4301	18.1044	18.2265	18.073	18.1278	18.3334	18.231	18.0852	18.0704	17.9724	18.6456	18.0658	18.1154	18.0487	17.6664	18.2595	18.1398	18.1439	18.2403	17.9102	18.1762	18.4824	18.1215	18.14	18.0075	1.10532	0.0867071	1.13438	0.00572331
Q8NEY1	Neuron navigator 1	NAV1	202.47	1877	15.8247	16.0488	15.6077	15.8314	15.3553	15.2729	15.4579	15.0551	15.2347	15.4993	15.366	15.6348	15.6903	15.498	16.9517	15.7924	15.5932	16.4426	15.578	15.9564	15.3925	15.4876	15.4809	15.8351	15.7806	15.275	15.3293	15.6868	15.4852	16.3213	15.5314	15.7399	15.7448	15.47	15.7835	15.7852	15.5257	16.1784	15.5594	16.175	0.794686	0.0868746	1.0043	0.957809
Q9BX97	Plasmalemma vesicle-associated protein	PLVAP	50.594	442	16.9223	17.1285	17.5068	16.9231	17.0709	16.9318	16.9053	17.1851	16.9761	17.6456	17.6529	17.157	17.2871	17.2358	17.1943	17.1556	17.4434	17.0202	17.5748	17.3543	17.853	17.4635	17.4042	17.7414	17.6671	17.6146	17.7024	17.7604	17.6618	17.733	17.6827	17.6183	17.5196	17.9278	17.3772	17.7017	17.7262	17.7106	17.5793	17.5412	0.877827	0.086994	0.739306	3.35405e-08
P13671	Complement component C6	C6	104.79	934	18.9931	18.3433	19.2118	18.7664	18.246	18.2867	18.2451	18.0878	18.181	18.7733	18.7924	19.0779	18.8673	19.7242	18.8108	18.1044	18.9424	18.4954	19.1967	18.4935	18.6879	18.779	18.8394	19.328	18.8951	18.3901	18.9408	19.1486	19.0882	18.8799	18.1984	18.4774	18.3664	18.177	18.4513	18.5636	18.4932	19.2361	18.7439	19.083	0.791643	0.0871372	0.96167	0.653576
O75915	PRA1 family protein 3	ARL6IP5	21.614	188	15.3536	15.4068	15.5998	15.2932	15.8105	15.3899	15.384	15.6402	15.6412	16.0731	16.1149	15.674	16.0947	15.2063	15.7123	15.6942	15.8358	15.6202	16.0053	15.7096	15.8372	15.7461	16.0349	15.9091	15.9217	16.1413	16.4027	15.9026	15.9018	15.8674	16.0265	16.0002	15.9439	15.882	16.402	16.412	16.2755	15.3642	15.6598	16.2515	0.866042	0.0871776	0.794913	0.000373864
P21817	Ryanodine receptor 1	RYR1	565.17	5038	17.9895	17.7767	17.938	18.2005	18.2226	17.967	17.861	17.8757	18.2867	18.1391	18.2688	18.0474	18.2215	18.2442	18.3315	17.8844	20.2182	18.2174	18.4295	18.2543	18.2896	18.0655	18.2959	18.2472	18.4227	18.2048	19.5959	18.4868	18.2911	18.6026	17.9996	18.3517	18.6361	18.1435	20.4955	18.2186	17.9659	18.3843	18.2103	19.6704	0.76522	0.0873156	0.806546	0.0985732
Q86TP1	Protein prune homolog	PRUNE	50.199	453	15.5765	16.0167	15.8972	15.7704	15.8229	16.0227	15.7612	15.8559	16.054	15.9885	15.8379	16.1536	15.7501	16.065	16.1997	15.9138	16.0734	16.2256	16.001	15.8279	15.8589	15.7406	15.9076	15.7571	15.8445	15.8681	15.9438	15.7993	15.8808	16.0957	15.8612	15.804	15.9871	15.8261	15.8065	15.715	15.8267	16.0081	15.7386	16.2649	0.914966	0.0874462	1.04533	0.18917
Q96CX2	BTB/POZ domain-containing protein KCTD12	KCTD12	35.7	325	16.86	16.3751	16.9438	16.4947	16.7307	16.7616	16.5865	16.5442	16.4667	16.8201	17.0996	16.7532	17.1211	16.9078	16.5565	16.4828	17.0453	16.5306	17.1113	16.7877	17.0674	17.2058	16.984	17.1277	16.9826	16.755	17.017	17.0235	17.2486	17.2465	16.9475	17.3254	17.0755	16.9358	17.4488	17.1791	17.5492	16.8473	16.8783	17.0306	0.881933	0.0877196	0.787405	1.49473e-05
Q641Q2	WASH complex subunit FAM21A	FAM21A	147.18	1341	14.6045	14.9237	13.3792	15.1314	14.1173	13.9528	14.2274	14.5359	13.8036	13.6187	13.6958	13.934	13.4356	13.8013	13.8196	14.4106	13.7208	14.5025	13.5992	13.5691	14.3695	14.9465	13.3427	13.5368	13.204	14.0335	14.6562	14.0062	14.1457	13.9539	14.0078	13.7446	14.3861	13.7514	13.9173	13.7999	14.7476	13.834	13.5992	14.3574	1.30188	0.0878105	1.01545	0.884419
P49336	Cyclin-dependent kinase 8	CDK8	53.283	464	13.9962	14.5055	13.6526	14.0709	14.4333	14.3386	14.0064	14.1969	14.4992	13.7773	13.6982	13.9149	13.71	13.8894	14.2103	14.4617	13.6637	14.1559	13.2902	13.9406	14.3808	13.6376	13.5453	13.7147	13.5462	13.9707	13.6542	13.9354	13.7348	13.8754	14.3957	13.8715	13.9653	14.0018	13.8096	13.6693	13.9584	13.7176	13.9976	13.3902	1.19267	0.08796	1.13445	0.0597837
Q7Z3E2	Coiled-coil domain-containing protein 186	CCDC186	103.69	898	13.619	14.5474	13.4236	14.8923	14.8061	14.0695	14.2118	14.5539	14.5301	14.4185	13.3434	13.8001	13.5059	13.3592	13.8709	14.7017	13.454	15.0402	13.1221	14.3133	16.0545	15.8031	13.8357	14.8613	13.617	13.7623	14.0345	14.115	14.0195	14.26	15.0942	14.0925	13.682	15.4203	13.5736	13.9127	14.2199	13.8251	16.0293	14.1037	1.37187	0.0879898	0.79188	0.146348
Q96ME7	Zinc finger protein 512	ZNF512	64.681	567	14.7249	14.8643	14.7897	14.7419	15.0629	14.7023	14.87	14.669	14.9308	15.6755	15.0215	15.3253	14.9297	15.1978	15.1564	15.0889	14.9847	15.1072	14.9622	15.0805	14.8964	14.9809	14.8118	14.8405	14.9649	15.1264	14.8017	15.0192	14.7971	15.3495	15.0526	15.0086	15.2562	14.7762	14.7586	14.8527	14.8894	14.9751	14.643	14.6425	0.881306	0.0882807	1.05125	0.291198
P09210	Glutathione S-transferase A2	GSTA2	25.664	222	16.288	17.0437	17.6301	17.0165	17.1902	16.7232	17.152	16.3939	16.5678	17.4384	17.0716	16.9581	17.6364	17.606	16.6647	18.3743	17.0097	17.0088	17.371	17.4922	17.2037	16.6147	17.8975	17.3619	18.2521	16.8389	16.7073	17.1513	18.7432	17.0448	18.2685	18.228	16.6271	17.2845	17.4098	18.5907	17.1517	16.9856	17.0881	16.7758	0.771165	0.0884353	0.823914	0.142126
Q7Z5L9	Interferon regulatory factor 2-binding protein 2	IRF2BP2	61.024	587	17.2581	16.9763	17.0026	16.671	17.0584	16.9956	16.755	16.8077	17.0614	16.5387	16.6266	16.9464	16.8216	16.5307	16.884	16.9421	16.5392	16.9312	16.4233	16.8183	16.5374	16.5484	16.9317	16.3962	16.4671	16.6658	16.8342	16.5387	16.6159	16.6723	16.5799	16.8475	16.7051	16.3258	16.2679	16.6673	16.5595	16.7573	16.3809	17.2405	1.12204	0.0885655	1.15065	0.00654379
Q5HYK3	2-methoxy-6-polyprenyl-1,4-benzoquinol methylase, mitochondrial	COQ5	37.14	327	15.1851	15.091	15.6194	15.154	15.4978	15.2412	15.0272	15.1872	15.0925	15.8748	15.5261	15.5192	15.2675	16.065	16.6893	15.1363	15.8669	15.0071	15.6895	15.4246	15.7416	15.3078	15.6194	15.9339	15.7221	15.6492	16.2423	15.7264	15.8345	16.0158	15.4817	15.577	15.793	15.417	16.0725	15.3871	15.6173	16.0394	15.6991	15.918	0.799889	0.0885956	0.822632	0.014156
Q86U38	Nucleolar protein 9	NOP9	69.437	636	17.3517	17.1558	16.7223	17.5097	17.1813	16.8355	16.9185	16.9254	16.6886	16.7033	16.7359	16.6815	17.0026	16.4793	16.4901	16.8616	16.7191	17.0524	16.7883	17.1227	16.771	16.8837	16.5289	16.7736	16.7424	16.7728	16.3906	16.9955	16.8534	17.2523	16.7068	16.9436	16.9475	16.8942	16.7695	16.5772	16.5541	17.4088	16.7345	16.4772	1.15337	0.0887432	1.06983	0.240904
Q9BPX5	Actin-related protein 2/3 complex subunit 5-like protein	ARPC5L	16.941	153	17.3711	17.3457	17.4882	18.1285	17.1916	17.3836	17.3826	17.4269	17.3428	17.4101	17.3498	16.9331	17.1554	16.5451	17.3233	17.7042	17.1819	17.3906	17.0941	17.4813	17.3106	17.287	17.5953	16.9985	17.1419	17.2976	16.9699	17.1974	17.067	16.8725	17.4382	17.2508	17.308	17.298	16.8921	17.0702	17.2462	16.8712	17.1468	16.8387	1.17384	0.08876	1.13022	0.037725
Q9P2D3	HEAT repeat-containing protein 5B	HEATR5B	224.3	2071	17.8121	17.6653	17.9502	17.8039	17.7324	17.7514	17.6365	17.6465	17.9907	17.7062	17.8707	18.3022	17.6565	17.8671	18.291	17.8231	17.8723	17.5617	17.9916	17.976	17.8954	17.7943	18.0364	17.938	17.9251	17.8817	18.0228	17.796	17.7518	18.094	17.7813	17.6958	17.7542	17.8954	17.2748	17.8992	18.0501	18.4328	17.7345	18.3323	0.900186	0.0889564	0.96332	0.445967
Q8TDQ7	Glucosamine-6-phosphate isomerase 2	GNPDA2	31.084	276	18.0018	17.607	18.0237	17.256	17.5209	17.5151	17.8013	17.7685	17.4238	17.887	18.0304	17.717	18.1919	17.5219	17.6362	17.9377	17.9037	17.6484	18.1006	18.0762	17.6795	17.8281	17.8594	17.7133	17.9858	17.9988	17.535	17.9311	18.1053	17.9384	17.7562	17.9266	18.2879	17.8066	17.9819	18.0009	18.0477	17.6111	17.5899	17.535	0.873028	0.089064	0.947719	0.29699
P08493	Matrix Gla protein	MGP	12.353	103	17.5274	17.3452	17.2275	17.5184	17.9073	17.2393	17.3032	17.038	17.1036	17.3885	19.7234	17.7683	17.4438	17.4072	17.484	17.2824	17.4997	17.8481	20.0974	17.154	17.1187	17.1711	17.7556	17.0919	17.446	17.0638	18.5364	16.8724	16.7427	17.7109	17.068	17.0436	17.0695	16.9751	18.658	17.5719	17.3829	17.5376	16.939	17.5104	0.654745	0.0891226	1.2329	0.163751
Q9BYD1	39S ribosomal protein L13, mitochondrial	MRPL13	20.692	178	17.3542	17.3844	16.8347	17.8057	17.123	17.3569	16.9379	16.8349	17.0182	16.8311	16.5929	17.2616	16.6406	16.496	17.2455	17.2601	16.8321	17.088	16.613	16.9379	16.8639	17.3679	16.8091	16.7011	16.7038	17.0285	17.0486	17.3316	17.5317	17.0198	17.0104	16.7772	16.7378	16.7823	17.0746	16.9886	16.8441	16.8054	16.8249	17.024	1.19028	0.0892212	1.04151	0.518423
Q9Y4W2	Ribosomal biogenesis protein LAS1L	LAS1L	83.064	734	16.7341	17.249	16.0114	16.7116	15.8755	16.4067	16.5793	16.2907	16.4501	15.6174	15.6534	15.959	16.0813	15.7864	15.7259	16.907	15.8513	16.5818	15.5611	16.1931	16.0602	15.9769	15.8053	16.0046	15.7768	16.0452	15.7911	15.8845	15.8168	15.7911	16.3252	15.8288	15.6295	16.1268	15.6498	16.0646	15.8581	15.8482	16.3111	15.7124	1.28571	0.0892828	1.22768	0.0142934
P35555	Fibrillin-1	FBN1	312.3	2871	21.2357	21.0835	22.1152	21.1144	21.6012	20.7414	21.746	21.1954	21.0645	22.4084	21.9473	21.421	23.1281	21.658	21.465	21.7651	21.6375	21.4131	22.5739	21.6499	21.282	21.9791	22.5016	22.2171	21.4873	21.0666	22.5462	22.058	22.0266	21.511	21.3973	21.497	21.2709	21.9791	21.7107	21.7251	21.4701	21.9229	22.0351	21.2384	0.739541	0.0894707	0.934411	0.542087
P02675	Fibrinogen beta chain	FGB	55.928	491	22.7159	22.0156	24.0803	22.3709	21.8342	22.6074	22.1773	21.9313	22.64	22.1974	22.613	23.153	22.613	24.5206	23.412	22.4233	23.6419	22.9	22.3282	22.3734	23.0623	22.3902	23.5752	23.5483	22.5206	22.4233	22.5681	23.0161	22.64	23.221	22.4898	22.7923	22.9345	22.4898	22.2111	22.2435	22.6624	22.9	22.9	23.353	0.68738	0.0895349	0.952881	0.706164
P08238	Heat shock protein HSP 90-beta	HSP90AB1	83.263	724	21.5676	21.7477	21.3193	21.8069	21.4548	21.2612	21.1706	21.5985	21.6692	20.4735	20.7661	21.3509	21.0143	20.9305	21.4324	21.4252	21.3625	21.3152	20.8986	20.9252	21.0255	20.8807	21.243	20.7351	20.7128	20.8224	20.6561	20.8298	20.835	20.8794	21.0255	20.8005	20.8807	20.8807	20.5215	20.6776	21.0562	20.6776	21.1488	20.7447	1.2015	0.0896105	1.34056	2.27214e-05
Q96FH0	Protein MEF2BNB	MEF2BNB	13.403	119	15.6294	15.6257	15.7497	15.5354	16.0738	15.5646	15.2774	15.4627	15.9673	15.7943	15.777	15.2909	15.6791	15.0172	15.2334	15.4878	15.5521	15.2857	15.711	15.6834	16.004	15.5649	15.517	15.5676	15.7017	15.932	16.2124	15.3904	15.4754	15.4729	15.7596	15.7254	15.8427	15.7794	15.1551	15.6674	15.9408	16.0018	15.4527	16.1942	1.14573	0.0898452	0.902516	0.0885967
Q14520	Hyaluronan-binding protein 2	HABP2	62.671	560	16.572	16.5136	17.3725	16.5634	16.6316	16.5779	16.3118	16.2834	16.3888	17.0029	16.801	17.0899	17.1506	17.4162	16.9441	16.2447	17.0141	16.5887	17.0232	16.6191	17.1319	16.7542	17.0897	17.7134	17.1978	16.9817	16.9409	17.0123	16.8504	16.9228	16.5572	16.8414	16.524	17.335	16.6989	17.0954	17.0513	16.9561	17.0497	17.092	0.830836	0.0898953	0.85008	0.0227013
Q14012	Calcium/calmodulin-dependent protein kinase type 1	CAMK1	41.337	370	15.2213	15.6999	15.8539	15.6276	16.4405	15.7646	16.0681	15.8775	16.0906	16.1609	16.4703	16.0481	15.6002	15.9029	16.6027	15.6819	16.3638	16.5951	16.3278	16.0176	18.1685	16.2319	15.8667	16.4972	16.2836	16.3068	16.3494	16.5704	16.9017	16.8075	17.5719	16.5342	16.1993	16.6544	15.7753	16.2672	16.5915	16.0831	17.2155	16.396	0.823272	0.0901553	0.686409	0.000936216
Q02543	60S ribosomal protein L18a	RPL18A	20.762	176	17.4963	17.2612	17.3149	17.4601	17.4088	17.3271	17.1382	17.1179	17.3509	17.0692	16.9576	17.2691	17.1914	17.2218	17.3239	17.4245	16.7862	17.1004	16.5795	17.3525	16.7823	16.8768	17.5523	16.9048	16.7658	17.061	17.1078	16.98	17.0357	16.4224	16.8108	16.6416	16.921	16.8556	16.7392	16.8897	16.7985	16.6848	17.1377	17.2921	1.128	0.0905581	1.22654	0.000358691
P11217	Glycogen phosphorylase, muscle form	PYGM	97.091	842	17.8158	17.6082	17.8989	17.4393	17.6077	17.1597	17.7724	17.7865	18.0574	18.0736	18.1486	18.083	17.8034	18.5743	18.1596	17.2385	19.0296	17.368	17.9167	18.2772	17.9006	18.0688	18.417	18.1446	18.0964	17.9213	19.5303	18.3641	18.1751	18.3234	17.8139	18.3801	17.9624	17.8742	20.8293	17.7298	18.0232	17.6469	17.9202	19.5007	0.791176	0.0906459	0.737033	0.0332549
Q86T26	Transmembrane protease serine 11B	TMPRSS11B	46.337	416	14.8009	14.4776	15.1134	15.108	14.9978	14.9526	15.0027	14.8165	15.0486	15.2517	15.3566	14.6705	15.5841	15.2912	15.208	14.9487	15.4017	14.9394	16.181	14.7726	15.7751	15.5766	15.4317	15.7473	14.8231	15.1178	15.0358	16.7272	16.1672	14.9768	15.5841	14.808	15.7632	15.8407	15.7632	14.5909	14.8156	15.8064	17.2804	14.897	0.824518	0.090871	0.742153	0.0175851
Q9P013	Spliceosome-associated protein CWC15 homolog	CWC15	26.624	229	16.6467	16.5945	15.9346	16.3069	16.2424	16.7647	16.5372	16.3062	15.8298	16.1693	15.847	16.59	15.8983	16.0783	16.3747	16.5707	15.7603	15.9989	15.766	15.9663	16.1429	16.2188	16.0373	16.0026	15.7619	16.2867	15.6628	16.312	16.3939	15.7271	16.5198	16.1372	15.8921	16.2013	15.2347	16.3627	16.1235	15.9697	16.4479	15.3453	1.1877	0.0910192	1.12517	0.120867
Q96GC5	39S ribosomal protein L48, mitochondrial	MRPL48	23.934	212	13.4925	13.9044	13.5179	13.484	13.7919	14.0338	13.9155	13.8708	13.8106	13.7631	13.5179	13.7888	13.3976	13.0728	13.507	14.1687	13.8208	13.6911	13.1248	13.2858	13.9736	13.5426	13.4958	13.4502	13.4091	13.624	13.9387	13.6244	13.6544	13.1919	13.8783	14.1245	13.2528	13.7234	13.3927	13.9856	13.781	13.3615	13.7001	13.39	1.16546	0.0910805	1.01625	0.792667
P30043	Flavin reductase (NADPH)	BLVRB	22.119	206	18.7111	19.5705	19.1211	18.6767	19.0271	19.1366	19.2014	19.4468	19.0824	19.5844	20.0371	19.0729	19.1771	19.2953	19.5325	18.596	19.7198	19.2086	20.0773	20.6297	19.9781	19.4859	18.9361	19.7772	19.979	20.2148	19.3523	19.9179	19.7554	20.3878	20.0251	20.2305	20.0251	20.2054	19.1795	19.3621	19.7123	20.6527	19.8042	19.7386	0.769068	0.0913381	0.711631	0.00183952
Q15080	Neutrophil cytosol factor 4	NCF4	39.031	339	16.3166	16.2262	16.8009	16.9433	16.7556	16.0694	16.2003	16.15	16.5377	16.0121	16.274	16.6733	16.524	17.5463	16.9084	16.4158	16.7924	16.8141	16.1471	16.8265	16.3661	16.4208	16.842	16.1145	16.3573	16.8912	16.4776	16.4514	16.4961	16.9054	16.1283	16.4028	16.6958	16.3166	17.2014	16.7052	16.6349	16.5824	16.2236	16.7986	0.817345	0.0914472	0.997302	0.971114
P13647	Keratin, type II cytoskeletal 5	KRT5	62.378	590	24.282	24.282	23.1593	24.0663	24.0663	25.0121	23.5886	23.8255	24.8305	22.5927	22.6184	24.0294	22.6768	22.6768	23.5851	24.4637	22.8594	24.4637	22.6361	23.7271	24.0294	24.0294	23.2374	22.5404	22.4371	22.8594	22.2075	22.8651	23.1067	22.5677	24.282	23.4561	22.2207	23.3329	21.6833	23.0365	23.8345	22.594	23.3087	22.3436	1.51243	0.0914686	1.5949	0.00691469
Q8NI60	Atypical kinase ADCK3, mitochondrial	ADCK3	71.949	647	17.3977	17.4951	17.8957	17.5575	17.734	17.5714	17.3918	17.5011	17.8124	17.9345	17.8648	17.625	17.7086	17.8984	17.7989	17.6462	19.0733	17.5804	18.1929	17.6687	17.7203	17.8766	18.0932	17.8735	17.9687	17.9902	19.537	18.0842	17.7871	18.0247	17.7269	18.1281	18.2032	17.8021	20.1056	17.8774	17.7201	18.4079	17.7802	19.0653	0.825528	0.0915492	0.746796	0.0151638
Q12959	Disks large homolog 1	DLG1	100.45	904	18.5389	19.3765	18.6735	18.7646	18.5977	19.5349	18.9706	19.0423	19.4173	18.647	18.7564	18.9454	18.6944	18.3209	18.629	18.9753	18.4879	18.8095	18.8658	18.6942	18.9411	18.7502	18.7827	18.6432	18.599	18.8048	18.5316	18.6856	18.7562	18.463	19.0197	18.8319	18.3542	18.9779	18.036	18.667	18.7416	18.2225	18.8804	18.4172	1.17972	0.092057	1.13432	0.0526893
Q8TB22	Spermatogenesis-associated protein 20	SPATA20	87.898	786	13.688	13.8358	13.6773	14	13.6153	13.5225	14.267	13.6398	13.7022	13.933	14.1041	13.8358	13.8004	13.968	13.9998	14.0262	13.8835	13.6886	14.0455	13.9784	13.7391	13.7391	13.8477	14.0224	14.0073	13.7935	14.4018	13.7261	13.8958	14.057	13.7573	14.1257	14.1736	13.8115	14.0734	14.0321	13.9769	14.4636	14.1662	14.0162	0.904418	0.0920908	0.913349	0.0471649
Q5SRE5	Nucleoporin NUP188 homolog	NUP188	196.04	1749	18.099	17.8659	18.0314	18.0462	17.9094	18.2119	18.1453	18.0021	18.0047	17.8282	18.1305	18.0344	18.2249	18.091	18.0976	17.9828	18.0928	18.1586	18.5766	17.9525	18.0352	18.0007	18.0623	18.1251	18.1131	18.3145	18.6714	18.1625	18.0153	18.1955	17.9859	18.4412	18.4557	18.002	18.7739	17.93	18.2513	18.2965	18.3282	18.0562	0.920325	0.0921147	0.909706	0.0364962
O76031	ATP-dependent Clp protease ATP-binding subunit clpX-like, mitochondrial	CLPX	69.223	633	17.898	18.0889	17.617	18.124	17.6523	18.184	18.0658	17.7572	18.0731	17.5854	17.8536	17.7522	17.658	17.5494	17.745	17.9412	17.7815	17.8359	17.6463	17.8253	18.075	17.8343	17.4709	17.5835	17.5393	17.9234	17.8227	17.6361	17.5356	17.933	18.1296	18.0039	18.2473	18.0156	17.3574	17.675	17.6807	17.908	17.8987	17.8076	1.1063	0.0922825	1.01947	0.687069
[truncated: 4,579 more rows]

## Sheet: Dysregulated in LNM
Majority protein IDs	Protein names	Gene names	Mol. weight [kDa]	Sequence length	T1	T2	T3	T4	T5	T6	T7	T8	T9	T10	T11	T12	T13	T14	T15	T16	T17	T18	T19	T20	Ratio(LNM/NO)	P_value(LNM/NO)	Expression Patern
[truncated: 126 more rows]

## Sheet: Dysregulated in Tumor
Majority protein IDs	Protein names	Gene names	Mol. weight [kDa]	Sequence length	T1	T2	T3	T4	T5	T6	T7	T8	T9	T10	T11	T12	T13	T14	T15	T16	T17	T18	T19	T20	Pt1	Pt2	Pt3	Pt4	Pt5	Pt6	Pt7	Pt8	Pt9	Pt10	Pt11	Pt12	Pt13	Pt14	Pt15	Pt16	Pt17	Pt18	Pt19	Pt20	Ratio(T/Pt)	P_value(T/Pt)	Expression Patern
[truncated: 848 more rows]
