# Supplementary material for: Ribosomal Dysregulation in Metastatic Laryngeal Squamous Cell Carcinoma: Proteomic Insights and CX-5461’s Therapeutic Promise
Source: Toxics. 2024 May 13;12(5):363. doi: 10.3390/toxics12050363 (PMC11126056; doi:10.3390/toxics12050363)
Supplement: Supplementary file 1 [file toxics-12-00363-s001.zip › Table S5.xlsx]

## Sheet: Table S5A
Table S5 Data related to Figure 2C
Clinicopathological data of patients in LSCC cohort
Patients	Sex	Age	T	N
P1	Male	63	4	YES
P2	Male	61	4	YES
P3	Male	80	4	YES
P4	Male	69	3	YES
P5	Male	47	4	YES
P6	Male	67	3	YES
P7	Male	60	3	YES
P8	Male	63	4	YES
P9	Male	69	3	YES
P10	Male	58	4	YES
P11	Male	72	3	NO
P12	Male	58	4	NO
P13	Male	71	3	NO
P14	Male	66	4	NO
P15	Male	55	3	NO
P16	Male	66	3	NO
P17	Male	48	4	NO
P18	Male	69	3	NO
P19	Male	78	4	NO
P20	Male	76	4	NO
Expression matrix of proteins dysregulated in LNM with P < 0.01
	LNM										Non-LNM
Gene names	P1	P2	P3	P4	P5	P6	P7	P8	P9	P10	P11	P12	P13	P14	P15	P16	P17	P18	P19	P20
LY6D	1.86654	3.85861	-0.201895	1.45761	1.07691	3.09513	-0.334339	0.641634	1.60941	-0.424621	-2.11541	-0.755164	-0.015301	-0.350467	0.234975	1.39574	-0.764122	0.015301	-2.02417	-0.92877
PPIF	0.447396	0.953619	0.24551	1.0291	0.393806	0.872141	0.347479	-0.06905	0.830753	-0.579715	-0.616527	-0.348985	-0.298675	-0.809537	-0.127512	0.06905	-0.235824	0.114405	-0.612882	-0.164068
SERPINB3	1.36158	0.28385	0.747289	1.43915	1.52587	-0.0960765	0.318813	1.08012	0.206296	-0.502121	-0.00646284	-0.497547	0.00646284	0.380381	-0.321627	-0.0702842	-0.164254	-0.0262712	-0.136929	-0.218738
RPS26	0.790921	0.509305	0.376883	0.583227	-0.0401356	0.515224	0.581219	0.33657	-0.0368963	-0.115788	-0.547655	-0.573029	0.0368963	-0.51909	-0.772755	0.613341	-0.401332	0.0474317	-0.665318	-0.644523
EIF4B	1.2576	0.867663	0.00389585	0.790974	0.130968	0.341928	0.463531	0.524101	-0.257244	0.0110597	-0.543717	-0.267785	-0.0155986	-0.533837	-0.759198	0.627675	-0.371658	-0.00389585	-0.147367	-0.0970003
RPL27A	1.17466	0.327987	0.244661	1.16845	0.242612	0.435493	0.679073	0.0396155	-0.0533905	-0.073973	-0.436962	-0.0396155	0.0999463	-0.575089	-0.166991	0.844024	-0.319866	-0.0779618	-0.864788	-0.345301
SLC1A3	0.297096	-0.234937	0.185245	0.203368	0.0178803	1.05671	0.620387	0.467715	0.71493	0.0427385	-0.0631672	-0.311386	-0.336838	-0.627475	-0.509279	-0.348027	-0.397664	0.389828	-0.0178803	-0.394642
SNRPC	0.786027	0.866499	0.279143	0.845152	0.18304	0.329544	0.845822	0.504163	-0.23172	-0.280237	-1.04194	0.0781246	-0.0781246	-0.113694	-0.185383	0.767091	-0.167072	-0.180693	-0.631999	-0.295489
DHRS9	0.312075	-0.414791	0.872206	0.345019	1.28296	0.664571	0.936753	-0.37422	0.285181	0.152883	-0.278066	-0.583275	-0.0103749	0.0103749	-0.318956	0.41583	-0.0631585	-0.352811	-0.328436	-0.371722
SRSF9	0.447646	1.13275	-0.169024	-0.150069	0.746863	0.22719	0.329158	0.367398	0.799043	-0.0567695	-0.309251	-0.126522	-0.0439504	-0.749559	-0.222006	0.459849	-0.532758	0.103076	-0.629677	0.0439504
RPL35	0.562083	0.294711	0.173003	0.526446	0.203494	0.109262	0.283715	0.00778224	-0.566272	-0.223257	-0.894499	0.0867381	-0.702948	-1.05119	-0.158489	0.154535	-0.451859	-0.00778224	-1.01773	-0.0679435
RTN3	0.0274125	-0.0249374	0.353057	1.24168	0.462533	0.291766	-0.44097	0.201873	0.185624	0.823517	-0.67664	-0.199412	-0.0426756	0.467558	-0.574469	0.0249374	-0.310123	-0.426888	-0.155367	-0.445538
SF3B5	0.433291	0.588756	-0.0194243	0.420869	0.254298	0.452178	0.45136	0.247835	-0.0540416	-0.274108	-0.68012	0.0194243	-0.195714	-0.512664	-0.614324	0.27765	-0.583108	0.490303	-0.694027	-0.371221
NAP1L1	0.919831	1.03492	-0.047366	0.148299	-0.119134	0.997771	0.501436	0.608976	-0.301777	0.047366	-0.0991784	-0.113717	0.18398	-0.428111	-0.45196	0.0832642	-0.130732	0.241584	-0.431631	-0.421311
RPL29	0.552015	0.476419	0.0400034	0.712028	0.250541	0.272983	0.0872379	-0.0559127	-0.0400034	0.130087	-0.200798	-0.195615	-0.466503	-0.60754	-0.466503	0.334752	-0.48187	-0.316566	-0.703274	0.229034
VDAC2	0.512879	0.38775	-0.00768794	0.53609	0.0827723	0.920394	0.230867	0.582124	0.00768794	-0.412688	-0.444925	-0.244789	-0.0819215	-0.530047	-0.936408	0.36413	-0.177922	-0.132295	-0.496236	0.252812
RPS10	0.753844	0.191994	0.0982573	0.144715	0.174738	-0.220559	0.14467	0.022248	0.339664	0.115708	-0.720789	-0.221426	-0.022248	-0.652631	-0.556178	-0.293409	-0.259383	0.295994	-0.502836	-0.430901
ANKRD22	0.759118	0.3947	-0.0414881	0.785625	0.363579	0.698304	0.695026	-0.0242292	0.516252	-0.234701	-0.191822	-0.273561	-0.36067	0.0826658	-0.210279	-0.105287	0.0242292	-0.223334	0.16395	-0.10573
RPS28	0.904779	0.618382	-0.0406522	0.0814151	-0.503979	0.280008	0.49923	0.364294	0.323306	0.330201	-0.202564	-0.350999	-0.274403	-0.410611	-0.519978	0.130116	-0.545477	-0.00127802	-0.0594609	0.00127802
FAM91A1	0.376574	0.654736	-0.644966	0.18284	0.966303	0.259761	-0.0222715	0.0222715	0.239101	0.0419507	-0.822171	-0.37922	-0.523408	0.265252	-0.0398193	-0.216411	-0.52933	0.0360806	-0.546047	-0.251749
NSDHL	0.366928	0.227906	-0.371015	0.199021	0.300191	0.748609	0.238475	0.469451	0.896242	-0.716324	-0.465233	-0.020679	-0.377918	-0.487591	0.020679	-0.115295	-0.44894	0.16295	-0.599313	-0.364512
TANC2	0.639894	0.0774524	-0.265716	0.674499	0.361522	0.25186	0.332678	0.2222	0.537314	-0.707919	-0.694424	-0.0774524	-0.471808	0.118417	-0.0804508	-0.250904	-0.44866	0.109265	-0.605447	-0.521229
RPL24	0.546994	0.435609	-0.0112342	0.362916	-0.0694411	0.34013	0.165435	0.205053	0.460755	0.244223	-0.0472921	-0.0835156	-0.240118	-0.625018	-0.390552	0.415054	-0.192361	0.0112342	-0.475411	-0.417876
RPL13A	0.713337	0.532869	0.311353	0.53116	-0.0211087	0.189649	0.132847	0.131487	-0.216319	0.555814	-0.263336	-0.102128	-0.0527419	-0.279085	-0.165826	0.445463	-0.349162	-0.207241	-0.74456	0.0211087
RPL34	0.18537	0.387188	-0.456589	0.41569	0.293357	0.213138	0.313252	0.0108461	0.170273	-0.3059	-0.362749	0.0644776	-0.492039	-0.563572	-0.154921	0.0147512	-0.610518	-0.0108461	-0.737378	-0.464808
TFB2M	-0.0229044	0.252716	-0.213377	1.05213	0.563318	0.357844	0.312973	0.0229044	0.546268	0.165738	-0.186128	0.271259	-0.178989	-0.428679	0.507653	-0.205564	-0.073559	-0.508415	-0.21051	-0.473568
RPL3	0.312878	0.524587	-0.310695	0.508307	0.0109499	0.258898	0.403044	0.197305	-0.0109499	0.223693	-0.0472161	-0.120836	-0.324183	-0.407378	-0.417052	0.165194	-0.426047	0.119809	-0.727698	-0.205103
SLC25A6	0.316841	0.430714	-0.291423	0.360546	0.101003	0.349504	0.388541	0.51945	0.320772	-0.227228	-0.280139	-0.073218	0.0622198	-0.656315	-0.0622198	0.144829	-0.223028	-0.332834	-0.572036	-0.225305
LBR	0.247689	0.514003	0.197391	-0.0358777	0.576866	0.62317	0.495962	0.0222012	0.48789	-0.34702	-0.481178	0.0148048	0.240282	-0.377865	-0.0222412	-0.204407	-0.186284	-0.424687	-0.176177	-0.0148048
ERH	0.529237	0.321049	-0.0057667	0.151089	0.180912	0.569663	0.207524	0.257319	0.363592	-0.216113	-0.58331	-0.212681	0.0057667	-0.0883333	-0.292304	0.404843	-0.3431	-0.119221	-0.558977	-0.231656
FDPS	0.0989882	0.410744	0.0516926	0.333881	0.238505	0.468413	0.0270266	0.26213	0.494002	-0.0270266	-0.413609	-0.0460754	-0.0542334	-0.504614	-0.430743	-0.121127	-0.341339	0.0649068	-0.122761	-0.0477477
MRPL27	0.0595209	0.640303	-0.295466	-0.301028	0.0889795	0.264656	0.578218	0.327003	0.282255	0.0908326	-0.345332	0.0629229	-0.193755	-0.550298	-0.0595209	0.218894	-0.283883	-0.24135	-0.750027	-0.460341
MRPL19	0.254436	0.89374	-0.382092	0.104424	0.322214	0.456388	0.407078	0.151828	0.0750751	0.206203	-0.11805	-0.106724	-0.193255	-0.352917	-0.220152	0.587789	-0.0750751	-0.287106	-0.758006	-0.287695
NPC1	0.640561	0.399661	0.097438	-0.0525488	0.300503	0.592547	0.0545815	0.498764	-0.0437777	0.00994595	-0.356587	-0.0977327	0.218761	-0.197465	-0.576926	0.0597473	-0.373261	-0.280292	-0.00994595	-0.150969
UCHL5	0.342768	0.643741	0.103747	-0.0420419	0.421775	0.529279	0.149737	0.21124	0.0398748	0.199102	-0.512132	-0.176618	0.301948	-0.0398748	-0.244313	-0.16973	-0.12225	-0.123601	-0.366686	-0.147841
LYPLA1	0.551669	0.407696	-0.0158852	-0.0249588	0.21036	0.421872	0.135778	0.454288	-0.351129	0.135778	-0.200144	-0.0596688	0.097164	-0.376093	-0.927624	0.184182	-0.575536	0.0158852	-0.195223	-0.194029
RPL32	0.668428	0.745622	-0.18289	0.607451	0.0613709	0.543037	0.724437	0.334232	-0.0899376	-0.115786	-0.152984	-0.088249	0.0680252	-0.204204	-0.270017	0.0656761	-0.0613709	0.186855	-0.27191	-0.0911516
NELFB	0.536797	0.0302035	0.449142	0.0918344	-0.175275	-0.00732885	0.401179	0.086619	0.419181	-0.0937012	-0.615055	-0.413079	-0.125547	0.0943316	-0.425647	-0.00282797	-0.411059	-0.453851	0.00282797	0.0123792
CYCS	0.591323	-0.0402832	0.455191	0.786921	0.438948	0.668258	0.00893916	0.130756	-0.0189613	-0.160287	-0.172951	-0.177281	-0.303257	-0.372146	0.193304	0.117243	-0.00893916	-0.0698942	-0.518391	0.138631
RPL23A	0.334779	0.164572	-0.00677064	0.375549	0.160946	0.0585913	0.251738	0.131809	-0.30695	0.0731	-0.215537	-0.235587	-0.268769	-0.848132	-0.494847	0.34342	-0.362177	-0.242218	-0.477338	0.00677064
GTPBP10	0.37928	0.621433	-0.011508	0.321773	-0.278535	0.413276	0.504199	0.715279	0.0136841	-0.105331	0.0305679	0.170847	-0.0175267	-0.564187	-0.221813	0.011508	-0.242294	-0.384215	-0.112211	-0.113487
RPS27	0.0267897	0.271612	0.215576	0.599152	-0.0267897	0.0309584	0.0632454	0.0651379	0.0667771	-0.492554	-0.285882	-0.554132	-0.221829	-0.29704	-0.590666	0.109504	-0.175955	-0.52632	-0.554249	0.0950726
ITPA	0.4482	0.507061	0.00556377	-0.157979	0.441938	0.623657	0.313973	-0.0564921	0.0283606	-0.00556377	-0.676562	0.128939	0.213342	-0.338507	0.215372	-0.0698973	-0.231067	-0.0714202	-0.448081	-0.355022
RBM17	0.247519	0.698487	0.2531	0.187741	-0.0832464	0.428411	0.224305	0.630137	-0.0993654	-0.142288	-0.449067	0.025239	-0.119122	0.160254	-0.392542	0.175528	-0.09506	-0.240984	-0.307615	-0.025239
MDC1	0.179824	0.306524	-0.00418964	0.0517303	0.393516	-0.0875281	0.328197	-0.0286331	0.686783	0.134355	-0.268396	0.17538	-0.341803	-0.57016	0.46296	-0.251871	-0.456589	-0.208747	-0.189702	0.00418964
SRP9	0.298098	0.328811	0.252013	-0.11225	0.194848	0.325158	0.069613	0.159961	-0.346627	0.0558053	-0.313082	-0.0162011	-0.140679	-0.496669	-0.089696	0.227216	-0.508609	0.0162011	-0.724578	-0.312119
DKC1	0.331299	0.452171	-0.0898176	-0.0212193	0.0897079	0.535432	0.274681	0.215028	0.370307	-0.0126439	-0.308309	0.0103919	-0.202281	-0.559543	-0.0103919	0.378985	-0.307938	-0.10795	-0.359873	0.0791116
TOP1	0.148942	0.272687	-0.0391212	0.282857	0.424407	0.347151	0.165561	0.0356377	0.550845	-0.429193	-0.250506	0.0258104	-0.159101	-0.564251	0.194727	-0.0375142	-0.273872	-0.150728	-0.521608	-0.0258104
CCT3	0.323146	0.551212	0.0287232	0.167005	0.212261	0.0557035	-0.182473	0.0953591	0.100426	-0.10217	-0.264994	-0.182776	-0.0287232	-0.624494	-0.546651	0.117027	-0.30127	0.0504334	-0.442628	-0.0409382
SNRPD2	0.234621	0.472987	-0.00659411	0.0446523	0.325869	0.598781	0.274984	0.182125	0.273753	-0.247417	-0.221539	-0.139349	-0.139349	-0.313066	0.00659411	0.432018	-0.24106	-0.10766	-0.515365	-0.0802419
PRPF38A	0.110879	0.323404	0.0343512	0.132876	0.261606	0.263883	0.30724	0.359817	-0.0115785	-0.248601	-0.277241	-0.0118283	0.029264	-0.446382	-0.445273	0.00290278	-0.165712	-0.00290278	-0.200364	-0.258135
PTGES3	0.208897	0.733914	-0.0770236	0.0086162	0.223096	0.25667	0.071732	0.234501	0.142519	-0.0805198	-0.16082	-0.248122	-0.0529649	-0.0512813	-0.494716	-0.0086162	-0.407368	0.308474	-0.491039	0.0245248
MYCBP	0.044132	0.167386	0.111443	-0.208001	0.195085	0.335895	0.143559	0.12059	-0.166062	0.0850828	-0.172029	-0.0779252	-0.483274	-0.755916	-0.37057	0.195085	-0.411511	0.100027	-0.450399	-0.044132
EIF2S2	0.492628	0.527842	-0.318853	0.111625	0.140909	0.32353	0.074414	0.0303886	0.276363	-0.0652945	-0.370793	0.0596004	-0.129397	-0.385923	-0.0971755	-0.0303886	-0.237938	0.205553	-0.445995	-0.260093
LRRC41	0.737132	0.210704	-0.134569	0.421831	0.0826833	0.246762	0.271059	0.121239	0.0469177	-0.148789	-0.380953	-0.021915	-0.186013	-0.104591	-0.272633	0.021915	-0.319909	-0.062028	-0.302076	0.21353
RPS2	0.389045	0.269749	-0.229806	0.245004	0.0075808	0.242534	-0.0244807	0.0424664	0.332174	-0.059003	-0.17239	-0.0075808	-0.183141	-0.584057	-0.402539	0.0169498	-0.346368	0.119431	-0.510161	0.141592
EIF5A	0.507256	0.507256	-0.000234745	0.266822	0.289701	-0.119439	0.229455	0.000234745	0.169448	-0.166127	-0.349162	0.050135	-0.206396	-0.127873	-0.274107	0.0457534	-0.357251	0.266822	-0.483789	-0.00284709
MARCKSL1	0.0372278	0.0433459	-0.0794676	0.0399244	0.0964864	0.576598	-0.160901	0.122053	0.309306	0.313729	-0.495578	0.186739	-0.0683471	-0.147848	-0.285023	-0.347559	-0.583364	0.187162	-0.0372278	-0.224043
RPL4	0.295429	0.135196	0.127432	0.0185155	0.269539	-0.0244072	0.306917	0.171657	0.0948029	-0.0634866	-0.337924	0.200939	-0.241251	-0.321348	0.19248	-0.0185155	-0.402793	-0.0619859	-0.558016	-0.207147
VMP1	0.139152	0.506517	-0.0346513	0.116904	-0.170374	0.314797	0.482234	0.535379	0.230811	-0.263544	-0.217561	-0.0554476	-0.325067	0.0575876	0.0346513	-0.220563	-0.193552	-0.0631838	0.0374016	-0.225962
EIF4E	0.0135228	0.543506	-0.0603052	-0.000526637	0.0501271	0.493684	0.222624	-0.182976	0.00638534	0.395825	0.155141	-0.288154	0.000526637	-0.303494	-0.356369	-0.018243	-0.400083	-0.205314	-0.0263534	0.023306
RPS7	0.226164	0.0808864	0.0943736	0.410799	-0.00869946	0.139363	0.120287	0.0627068	-0.00730154	0.00730154	-0.213597	0.0666703	-0.384498	-0.714843	-0.0149972	0.30703	-0.364301	-0.0602362	-0.359999	-0.0305339
SRRM1	0.0290022	0.294636	-0.0259943	-0.113988	0.068793	0.317454	0.336378	0.509132	0.195915	-0.121559	-0.0437145	0.0201903	-0.333773	-0.485451	0.0837988	-0.280597	-0.25223	0.00503534	-0.095938	-0.00503534
VBP1	0.271583	0.533632	-0.0507684	0.00224051	0.406363	0.358523	0.102877	-0.00224051	0.19214	-0.0404025	-0.230156	0.148916	-0.129528	-0.267794	-0.0262127	0.041767	-0.178993	0.0351022	-0.225888	-0.264728
SCP2	0.104873	0.151309	0.0797182	-0.152023	0.354885	0.542172	0.128312	0.527067	0.0227102	-0.14802	-0.149048	-0.0769295	-0.0170753	-0.300377	-0.098545	0.0170753	-0.211112	0.220681	-0.361667	-0.213775
SSU72	0.345283	-0.0959125	-0.0643323	0.263609	0.0101552	0.483084	0.325217	0.145998	-0.0101552	0.211547	-0.0107354	-0.4131	0.0915275	-0.409964	-0.33349	0.177087	-0.166741	0.188632	-0.230779	-0.0796535
TARS	0.0508578	0.460103	0	0.407802	0.191656	-0.0659313	-0.108353	0.411075	0.191905	0.43182	-0.0550808	0.136509	-0.167543	0.254195	0	-0.211093	-0.404081	-0.00744437	-0.161206	-0.185047
EIF4A1	0.300447	0.352312	-0.331318	0.299827	-0.080969	0.118132	0.0914282	0.0637313	0.247654	0.0511302	-0.30537	-0.11071	-0.219708	-0.0380582	0.0190105	-0.0190105	-0.274104	0.0247132	-0.401864	-0.234019
EIF3D	0.369312	0.300629	-0.01441	0.307753	-0.0118707	0.389663	0.104075	0.204038	-0.00721143	0.201121	-0.101426	-0.0822838	0.0329084	-0.389555	-0.115233	0.185758	-0.195696	-0.0356435	-0.121882	0.00721143
BCAS2	0.225305	0.200906	0.225305	0.114924	-0.0183067	0.268454	0.173817	0.176254	-0.184364	-0.205521	-0.407047	-0.0449502	0.0183067	0.108319	-0.244999	0.0968032	-0.24012	-0.192137	-0.448275	-0.14839
EEF2	0.247597	0.106466	0.03901	0.020165	0.128605	-0.0384092	0.046942	-0.0832354	0.0211432	0.00358316	-0.27511	-0.114331	-0.114331	-0.579981	0.014488	-0.00358316	-0.411596	-0.114941	-0.39345	0.0827828
CLINT1	0.0642772	0.179788	0.215345	-0.239522	-0.144249	0.142072	0.13877	0.278648	0.226779	0.220799	-0.0490407	-0.0578804	-0.25117	-0.489551	-0.0389023	0.00232767	-0.245788	-0.0428022	-0.00232767	0.00907765
RPS5	0.120206	0.067147	-0.250899	0.196603	0.152417	-0.0197901	0.173187	-0.00778468	0.130222	0.00778468	-0.239824	0.0174079	-0.334729	-0.321291	0.0174079	0.0582063	-0.286547	-0.0578388	-0.348413	-0.139644
EIF3K	0.307273	0.108569	0.303014	-0.062831	0.0188561	0.361917	0.307463	0.212425	-0.156918	0.0689127	-0.13442	-0.0957051	-0.0188561	-0.192625	-0.0957051	-0.0725767	-0.209287	0.20039	-0.0465047	0.0596081
RPS3	0.116676	0.152813	-0.0403227	0.301553	0.0926293	-0.103688	0.0804869	0.173547	0.0674335	-0.00696873	0.00696873	0.12354	-0.333615	-0.355424	-0.163354	-0.067023	-0.193505	-0.0912912	-0.103688	0.0706852
IKBKAP	0.204006	0.118074	-0.0379366	0.174918	0.137428	0.0139814	0.0781996	0.163542	-0.186628	0.121877	-0.202788	0.138765	-0.209417	-0.253624	-0.195871	-0.0244007	0.0163297	-0.0297606	-0.0139814	-0.0442792
CDC42BPA	-0.177321	-0.141996	-0.216269	0.00984255	-0.0150495	-0.319447	0.0226974	-0.0926651	0.034611	-0.495576	0.113353	0.089923	0.223816	-0.00984255	0.143485	-0.0886814	0.14559	-0.140341	0.0642484	0.154251
RAD23A	-0.0826598	0.102315	-0.0583309	-0.270698	-0.509158	-0.0918916	-0.294931	-0.0115578	-0.105073	0.0277503	0.0803891	0.259065	-0.0532245	0.0491626	0.270132	0.0454384	-0.00594301	0.00594301	0.201917	0.192854
DMXL1	-0.306453	-0.209973	-0.0122557	-0.149749	-0.0750437	-0.138133	0.170286	0.222083	-0.168713	-0.124553	0.470684	0.0757628	0.0122557	0.229585	0.346549	0.0633308	-0.0620718	-0.0337904	0.267728	0.18929
TOR1B	-0.340173	-0.348159	0.048627	-0.257465	0.130923	-0.0556487	-0.00649713	-0.0456232	-0.176928	-0.289548	0.0895042	0.0721646	-0.0225814	0.327253	0.174583	-0.16934	0.0806161	0.167498	0.288922	0.00649713
EPB41L2	-0.446628	-0.159787	0.0970758	-0.213741	-0.196104	0.0203897	-0.05324	-0.182921	-0.191176	-0.0203897	0.100849	0.0725648	0.585802	-0.0511878	0.0594811	0.0952213	0.215181	-0.120905	0.0816776	0.0223529
SYNE1	-0.270569	-0.310502	0.273135	-0.235639	-0.0904585	-0.277166	-0.00601147	-0.106982	0.00601147	-0.197526	0.142259	0.110603	0.172142	0.451409	0.262714	-0.220533	0.211437	-0.191628	0.194679	0.0961464
MPZL1	-0.0821654	0.144458	-0.107946	-0.0707908	0.0300103	-0.118623	-0.095245	0.135483	-0.201032	-0.0935614	0.614235	0.335019	-0.0948868	0.0774538	0.341874	-0.0311937	-0.0300103	0.309209	0.36943	0.104157
MAP1A	-0.056177	-0.598129	-0.184346	-0.00400382	-0.0807027	-0.0870378	0.28318	-0.272738	-0.0553439	-0.316862	0.0677446	0.308813	0.0226326	-0.0629128	0.161707	0.0959033	0.304302	0.020975	0.173756	0.00400382
HACD4	-0.165285	-0.311375	0.153338	-0.220293	-0.33955	-0.354275	0.0404884	0.277535	-0.064422	-0.238211	0.345707	-0.104955	0.247382	0.145482	0.109794	-0.0404884	0.108866	0.21692	-0.068878	0.294034
FLOT2	-0.314029	-0.182871	0.356108	-0.148348	-0.192361	-0.0272896	-0.067885	0.0609884	-0.318352	-0.0237084	0.307554	-0.0365984	0.341923	-0.202578	0.332632	0.326751	0.311077	0.139913	0.120896	0.0237084
VWF	-0.202049	-0.492726	0.289696	-0.014519	0.0433153	-0.140201	-0.348562	-0.26002	-0.0774699	-0.219764	0.299608	-0.000949486	0.305213	0.33429	0.00223536	0.130212	0.126993	-0.177538	0.183691	0.000949486
PRPSAP1	-0.147518	0	0	-0.204371	-0.340227	0.0326063	-0.027994	-0.184156	-0.400743	0.225036	0.174022	0.33651	-0.161684	0.0499188	0.506673	0.178502	-0.0374327	-0.00528452	0.421106	0.189972
PKN1	-0.338496	-0.149321	-0.00596016	-0.152564	-0.0954607	-0.33514	0.16149	0.0328745	0.191953	-0.252207	0.00596016	0.477801	0.301439	0.57398	-0.0124668	-0.114145	0.362028	-0.0281206	0.0123651	0.267854
GBE1	-0.226226	-0.257532	0.0562818	-0.206788	-0.0286989	-0.327816	0.0200391	-0.153906	-0.0481055	0.148832	0.104513	0.0367081	-0.0200391	0.690211	0.13289	0.15299	0.581886	-0.0481248	0.176676	-0.0236821
FYCO1	-0.148505	-0.194898	0.103815	-0.0388888	-0.331715	-0.317366	-0.431701	-0.316094	-0.000228114	0.209992	0.000228114	-0.0775175	0.06847	0.149388	0.252663	0.123263	0.597094	-0.0219955	0.241038	0.0418442
GALK1	-0.151786	0.0739769	-0.142246	-0.180651	-0.11318	-0.163474	-0.139176	-0.241422	-0.0689815	0.132198	0.269909	-0.0821588	0.157813	0.442087	0.0419813	0.267598	-0.0265333	0.753763	0.0265333	0.0644438
XPC	-0.238295	-0.208085	0.131427	-0.426311	-0.314344	-0.393657	0.0480185	-0.21168	-0.113824	0.0600751	0.0737564	-0.00524436	0.326225	0.554578	0.138683	-0.023381	0.00524436	-0.230508	0.243945	0.194869
PREPL	-0.513092	-0.0230926	-0.00169023	-0.229519	-0.314216	-0.17707	-0.221735	0.116356	0.0331326	-0.0831015	0.166184	0.183188	-0.00893508	-0.0460077	0.00169023	0.288186	0.618566	0.0885467	0.234222	0.0746814
THEMIS2	-0.0108866	-0.104853	0.0196852	-0.144303	-0.0554096	-0.228796	-0.144318	-0.0155116	-0.112953	-0.105767	0.27291	0.0108866	0.297811	0.203564	0.181801	-0.274156	0.232809	0.0751124	0.184285	0.947441
ACPP	-0.163233	-0.247405	0.155735	-0.104073	0.0210609	-0.150624	-0.194546	-0.0686659	-0.0751322	0.200528	-0.165806	0.2153	0.471951	0.605311	0.139681	0.388209	-0.0556328	-0.0210609	0.431759	0.417374
TP53BP1	-0.186105	-0.402448	0.00380421	-0.0648781	-0.0059924	-0.33571	0.147737	-0.0339728	-0.191228	0.0472269	-0.123428	0.269036	-0.187998	0.270648	0.414041	-0.00380421	0.494836	0.0958118	0.121959	0.699094
STAT5A	-0.335244	-0.246477	0.0351496	-0.0418818	0.0102483	-0.426348	-0.194776	-0.22278	-0.0197613	0.12443	0.317984	-0.0857566	0.305909	0.237098	0.183958	-0.0102483	0.226042	-0.0182059	0.259757	0.408726
ITSN1	-0.0359178	-0.252515	-0.240521	0.299164	0.0295514	-0.102149	-0.498773	-0.55569	-0.443157	-0.144364	-0.0931672	0.095167	0.0420279	0.229625	0.00958868	0.0961305	-0.00958868	0.27493	0.11989	0.617116
ARAP1	-0.396105	-0.523503	0.0516197	-0.00501972	0.0528303	-0.346721	-0.244269	-0.240011	-0.0445095	-0.374434	-0.127622	0.239554	0.311393	0.550477	0.253965	0.00501972	0.135632	0.12936	-0.242219	0.0182205
MAN2C1	-0.170775	-0.327029	0.156756	0.23488	0.00112502	-0.591341	-0.213506	-0.309473	-0.468809	-0.024952	0.177711	0.535452	-0.00112502	0.158167	0.3686	0.115629	0.275033	-0.215578	0.319445	-0.08732
LAMA5	-0.505654	-0.592315	0.116939	-0.110172	-0.00214176	-0.327978	-0.499086	-0.232746	0.00214176	0.120306	0.315677	-0.00869928	0.185073	-0.0216882	0.10879	0.0403142	0.28954	-0.140761	0.548862	0.0364889
EHD3	-0.0591072	-0.497476	0.180294	0.0821983	-0.402804	-0.0179027	-0.188383	-0.250041	-0.245662	-0.250698	0.189813	0.213215	0.232519	0.370072	0.0179027	0.295878	0.558448	-0.0418328	-0.118827	0.0493171
SORBS3	-0.3839	-0.504218	-0.270685	-0.466727	-0.0170781	-0.313206	0.236407	-0.133427	-0.106877	0.110686	0.298587	-0.00151143	0.552412	-0.314031	0.0714846	0.22032	0.244982	0.00151143	0.523988	0.0538937
DAG1	-0.199422	-0.16557	0.126174	-0.0167115	-0.37292	-0.208761	-0.131212	-0.0825651	-0.125806	0.364775	0.575012	-0.110449	0.237042	0.126174	0.0167115	0.307855	0.847194	-0.158736	0.56481	0.306356
SNTB2	-0.374062	-0.368375	-0.0199923	-0.209652	-0.453803	-0.0777884	-0.181041	-0.347246	-0.32331	0.227363	0.1231	0.026346	0.0950985	0.743509	0.148664	0.0199923	0.284141	-0.26387	0.0592659	0.172748
LAMB2	-0.43241	-0.547607	0.167503	-0.102882	-0.0352184	-0.319266	-0.317557	-0.227492	-0.0858193	0.354095	0.493995	-0.0538339	0.128273	0.144523	0.207267	0.0752278	0.571144	-0.173342	0.575744	0.0352184
NBEAL2	-0.369827	-0.402477	0.0690849	-0.312632	0.00778891	-0.208784	-0.289255	-0.200225	0.0507097	-0.208969	0.220274	0.085527	-0.176908	0.703341	0.369619	0.021415	-0.00778891	-0.104651	0.397778	0.208172
MAN1A1	-0.349129	-0.551577	0.118812	-0.475029	-0.107288	-0.180475	-0.0678774	-0.328117	-0.325365	0.242297	0.655632	0.225302	0.111411	0.0240792	-0.0240792	-0.436235	0.0638536	0.131261	0.496903	0.341872
PROS1	-0.222445	-0.539911	0.116515	-0.235291	-0.399711	-0.301757	0.0632002	-0.351204	-0.0974448	-0.143043	0.0278333	0.468218	-0.0278333	0.849932	0.305631	0.055564	0.192212	0.0368867	0.0361274	-0.412984
PTK2B	-0.286358	-0.251194	0.0191515	0.0611446	-0.18291	-0.342961	0.11291	-0.110634	-0.084301	-0.144039	0.620469	-0.199635	-0.0212433	0.461571	0.109924	0.479042	-0.0191515	0.0796295	0.755415	0.319382
PGM1	-0.0125078	-0.303733	-0.12166	-0.268729	-0.236455	-0.361473	-0.244256	-0.056229	-0.275887	0.0670157	0.0125078	0.0336838	0.0786301	0.387514	0.223684	0.308219	0.639761	0.0944763	0.334116	-0.130035
SERPINF1	-0.237057	-0.600069	0.360672	-0.305362	-0.48054	-0.385	0.113515	-0.173328	-0.340416	0.180437	0.598242	0.288655	0.326393	-0.185206	0.113829	-0.0528429	0.47834	-0.162937	0.588094	0.0528429
ADD2	-0.421974	-0.281448	-0.54863	0.449174	-0.273293	0.141896	0.00950853	-0.128554	-0.462897	-0.226578	0.444616	-0.226551	0.471272	-0.130681	0.211225	0.719997	0.506811	0.28283	-0.00950853	0.0623445
CRNN	-0.238703	-0.794905	-0.0273755	-0.237685	0.319786	-0.246636	-0.677772	-0.537022	0.0987375	0.0273755	0.170907	0.484208	-0.0493017	0.651418	0.158295	-0.226755	0.131122	0.56417	-0.105214	0.113052
PDK2	-0.0317078	-0.276377	-0.0348493	-0.230108	-0.322462	-0.211976	-0.0410662	0.0222027	-0.122158	0.317592	0.826943	0.335785	0.372334	0.120302	0.492159	-0.218492	0.442701	-0.0222027	0.740969	0.186201
DDAH2	-0.276671	-0.426098	-0.06566	0.00580983	-0.385277	-0.0460229	-0.28807	-0.124626	-0.130874	0.698935	0.506282	0.19419	0.441918	0.499986	0.302086	-0.00580983	0.198924	-0.105246	0.758141	0.464083
TECPR1	-0.745135	-0.404927	0.0540023	-0.1806	-0.474565	-0.14396	-0.318658	-0.23577	0.102418	-0.0389633	0.496373	0.0540023	0.0833113	0.678727	0.375115	-0.295016	0.0389633	-0.0992683	0.474211	0.173293
CACNA2D1	-0.508339	-0.355752	-0.00166928	-0.274705	-0.303577	-0.421413	0.124072	-0.355879	-0.206835	-0.150246	0.212111	0.250228	0.35202	0.00166928	0.111999	0.232023	0.70787	-0.167114	0.310535	0.00727159
SYNM	-0.349481	-0.598139	0.00543142	-0.214073	-0.217775	-0.428247	-0.301717	-0.304836	0.138827	0.275447	0.590867	-0.0615778	-0.00543142	0.458575	0.0366014	-0.328617	0.744981	0.080697	0.98932	0.0914552
RNASE3	-0.378488	-0.44225	0.319284	0.00970955	0.561919	-0.014517	-0.527029	-0.460203	-0.559056	-0.41417	0.313184	0.197219	0.459386	0.919449	0.450946	-0.125994	0.59031	-0.0898731	0.0919406	-0.00970955
SPTA1	-0.289382	-0.61027	-0.113357	-0.174416	-0.00511292	-0.064655	-0.289615	-0.261169	0.00511292	0.0144917	0.609253	0.0347422	0.391681	0.308297	0.314059	-0.458958	0.945473	-0.025802	0.756672	0.197246
SERPIND1	-0.518405	-0.613717	0.277324	-0.26738	-0.260742	-0.242153	-0.257229	-0.381174	-0.315169	0.4818	0.55682	0.569318	0.272738	0.580043	0.228608	-0.468722	0.698584	-0.165555	0.341137	0.165555
AGL	-0.632273	-0.315876	0.00325633	-0.201447	-0.140422	0.0601741	-0.530667	-0.349324	-0.159242	0.247552	0.245204	0.213954	-0.00325633	0.39973	0.213954	0.808457	0.790673	-0.163726	0.44729	-0.0831121
SPTB	-0.244526	-0.684536	-0.174995	-0.0115486	0.123176	-0.133556	-0.422451	-0.280164	0.0356985	-0.00184422	0.36482	0.00184422	0.26487	0.459455	0.36873	-0.385905	1.44816	-0.0216825	0.497943	0.126834
SYNPO	-0.134111	-0.470395	-0.296987	-0.129568	-0.14048	-0.294037	-0.394001	0.104687	0.0119805	-0.0119805	1.10031	0.324537	0.139957	-0.0926873	0.176655	0.0600636	0.482638	0.503589	0.662258	-0.0709486
EPHX2	-0.44652	-0.387321	0.250441	-0.26972	-0.0792751	-0.324554	-0.72957	-0.612147	-0.381389	-0.000307546	0.442045	0.183924	0.000307546	0.168741	0.277478	0.422236	0.627327	-0.554412	0.483239	0.0915904
A4GALT	-0.414383	-0.434122	0.443093	-0.202068	-0.0843624	-0.353666	-0.00797559	-0.0549098	0.0466706	-0.133644	1.46832	0.539198	0.235904	0.723362	0.249533	0.145773	0.00797559	-0.0770496	0.815551	-0.156011
TMEM173	-0.161016	-0.542275	0.553282	-0.769399	-0.254455	-0.618279	-0.114393	-0.0467738	-0.662325	0.146193	0.416437	0.0467738	0.303311	0.629034	-0.0722415	-0.282411	0.225524	0.889838	0.275527	0.339448
OLFML1	-0.369959	-0.386639	-0.00194092	-0.110668	-0.253935	-0.205954	-0.0565445	-0.339413	-0.344497	0.257222	1.19001	0.00194092	0.278873	0.521959	0.057684	0.0110306	0.101104	-0.0055956	1.04177	0.251278
OLFML3	0.0528169	-0.462663	-0.0310771	0.0713148	-0.42151	-0.420757	-0.119239	-0.14201	-0.393526	-0.0188954	1.03541	0.0528169	0.413508	0.58739	0.0135862	-0.0135862	0.356254	-0.228423	0.967389	0.227969
C8B	-0.242114	-0.73459	0.0937947	0.0115957	-0.527147	-0.66518	-0.252895	-0.412608	-0.349191	0.0658014	0.730831	0.278597	0.193912	0.721351	-0.0101715	-0.506669	0.406931	0.0101715	0.745609	-0.164875
APOE	-0.46429	-0.433186	0.299372	-0.244064	-0.252755	-0.459758	-0.695971	0.0156406	-0.370238	0.074547	0.870384	0.047777	0.577122	0.563897	0.047777	-0.21953	-0.0156406	0.205018	0.895135	-0.083284
C4A	-0.380916	-0.607522	0.0784324	-0.0123918	-0.274147	-0.30219	-0.473133	-0.164443	-0.45597	0.0443402	0.350305	0.471496	0.260528	1.44277	0.377294	-0.47297	0.278024	-0.164926	0.6577	0.0123918
CPB2	-0.397652	-0.562285	0.048835	-0.260107	-0.533293	-0.476382	-0.048835	-0.38941	-0.119486	0.270676	0.409288	0.721509	0.0582565	1.30393	0.66606	-0.643013	0.152494	0.259791	0.568143	-0.187855
COL6A2	-0.400839	-0.788026	0.2186	-0.101459	-0.321332	-0.528719	-0.319028	-0.208474	-0.465937	0.630981	0.863193	0.265114	0.421806	0.152744	-0.0431964	0.0431964	0.450761	-0.289192	1.13982	0.730416
ZBED1	-0.885369	-0.482907	0.183828	-0.63121	-0.640684	-0.786639	0.0303545	-0.15271	-0.906881	0.081479	0.534113	0.314259	0.397274	-0.0957611	0.779514	-0.60447	0.00106151	0.311941	0.805784	-0.00106151
CA1	-0.39259	-0.822586	-0.306496	-0.254696	0.00775844	0.291001	-0.451611	-0.164775	-0.495336	0.19286	0.87959	-0.00775844	0.622673	0.771206	0.480996	-0.623532	0.744443	-0.0799346	0.950944	0.51709
COMP	-0.635501	-0.644226	-0.247081	0.000626554	-0.379069	-0.368734	-0.453202	-0.0662925	-0.447711	0.124509	0.425812	0.224388	0.91461	0.420889	0.411127	-0.26484	0.821175	-0.000626554	0.627579	0.0966383
ASPN	-0.392059	-0.0717997	-0.0413644	-0.0849645	-0.262485	-0.326679	-0.252637	-0.241317	0.172103	0.216623	1.30555	0.090551	1.7401	0.333912	0.0413644	-0.0729514	0.403657	-0.0832657	1.03699	0.800474
UCHL1	0.674246	-0.835709	0.0574588	-0.458931	-0.533232	-0.66074	-0.381364	-0.699293	-0.441013	-0.00746704	0.00746704	1.11467	0.687174	-0.0827053	0.833415	1.14769	0.825175	-0.597781	0.470257	0.377006
APOC1	-0.845426	-0.998294	0.247193	-0.56302	-0.134251	-0.255937	-0.370611	-0.278569	-0.137868	0.134251	0.927209	0.790498	0.136738	1.09681	1.49034	-0.680969	0.388747	0.195507	0.92268	-0.135825
COL8A1	-0.553813	-0.67125	-0.26848	-0.851567	0.0646352	-0.828123	0.146611	0.123841	-0.26819	-0.591975	1.45486	0.0125948	1.33826	-0.562373	0.458779	-0.0125948	-0.0355542	0.324363	1.57685	0.327735
VTN	-0.820798	-0.947488	0.162877	-0.861061	-0.79113	-0.872888	0.0320367	-0.471382	-0.66023	0.334982	1.68306	0.912712	0.313811	1.69224	0.861057	-1.03225	0.0894515	-0.0729203	1.67817	-0.0320367

## Sheet: TableS5B
Pathway enrichment analysis of UP-regulated proteins
Category	Term	Count	PValue	Genes
KEGG_pathway	Ribosome	20	6.31152e-20	RPL4, RPL3, RPL32, RPS7, RPS5, RPL34, MRPL19, MRPL27, RPL13A, RPL23A, RPS26, RPS28, RPS27, RPL27A, RPS3, RPL24, RPL35, RPS2, RPL29, RPS10
	Coronavirus disease - COVID-19	18	1.48721e-14	RPL4, RPL3, RPL32, RPS7, RPS5, RPL34, RPL13A, RPL23A, RPS26, RPS28, RPS27, RPL27A, RPS3, RPL24, RPL35, RPS2, RPL29, RPS10
	Spliceosome	7	0.00195696	SF3B5, RBM17, PRPF38A, SNRPD2, SNRPC, BCAS2, SRSF9
Biological processes	Cytoplasmic translation	18	5.52961e-25	RPL4, RPL3, RPL32, RPS7, RPS5, RPL34, RPL13A, RPL23A, RPS26, RPS28, RPS27, RPL27A, RPS3, RPL24, RPL35, RPS2, RPL29, RPS10
	Translation	20	2.9173e-21	RPL4, RPL3, RPL32, RPS7, RPS5, RPL34, MRPL19, MRPL27, RPL13A, RPL23A, RPS26, RPS28, RPS27, RPL27A, RPS3, RPL24, RPL35, RPS2, RPL29, RPS10
	Translational initiation	8	1.24312e-09	EIF4A1, EIF3K, RPS5, RPS3, EIF2S2, EIF3D, EIF4E, EIF4B
	mRNA splicing, via spliceosome	8	9.15089e-06	SF3B5, RBM17, PRPF38A, SNRPD2, SNRPC, BCAS2, SRRM1, SRSF9
	Ribosomal small subunit assembly	3	0.00156762	RPS28, RPS27, RPS5
	Formation of cytoplasmic translation initiation complex	3	0.00177239	EIF3K, EIF2S2, EIF3D
	Ribosomal small subunit biogenesis	4	0.00261086	RPS28, RPS27, RPS7, RPS5
	Ribosomal large subunit assembly	3	0.00325021	RPL3, RPL24, RPL23A
	Cholesterol biosynthetic process	3	0.00871392	FDPS, NSDHL, LBR
	mRNA processing	5	0.0117456	SNRPD2, SSU72, BCAS2, SRRM1, SRSF9
Pathway enrichment analysis of Down-regulated proteins
Category	Term	Count	PValue	Genes
KEGG_pathway	Complement and coagulation cascades	7	5.53817e-06	C4A, VTN, CPB2, VWF, SERPIND1, PROS1, C8B
	ECM-receptor interaction	7	6.76384e-06	COMP, LAMA5, VTN, VWF, LAMB2, COL6A2, DAG1
	Focal adhesion	6	0.0042642	COMP, LAMA5, VTN, VWF, LAMB2, COL6A2
Biological processes	Cell adhesion	9	0.000516061	COMP, VTN, THEMIS2, VWF, LAMB2, COL6A2, COL8A1, FLOT2, SORBS3
	Negative regulation of blood coagulation	3	0.000945233	VTN, PROS1, APOE
	Blood coagulation	4	0.00356963	CPB2, VWF, SERPIND1, PROS1
	Very-low-density lipoprotein particle clearance	2	0.00983801	APOC1, APOE
	Negative regulation of endopeptidase activity	3	0.01366	VTN, SERPIND1, SERPINF1
	Regulation of synaptic plasticity	3	0.0161622	MAP1A, DAG1, PTK2B
	Chylomicron remnant clearance	2	0.0163437	APOC1, APOE
	Regulation of cell adhesion	3	0.0166844	LAMA5, VTN, PTK2B
	Positive regulation of protein binding	3	0.0247243	SPTA1, VTN, ADD2
	Positive regulation of cholesterol esterification	2	0.0292291	APOC1, APOE
